# Supplementary material for: Transcriptome-Wide Identification of Coding and Noncoding RNA-Binding Proteins Defines the Comprehensive RNA Interactome of Leishmania mexicana
Source: PubMed Central journal article supplement (PMC8826732; doi:10.1128/spectrum.02422-21), 2022-02-09
Supplement: spectrum02422-21_supp_1_seq3.pdf [file spectrum02422-21_supp_1_seq3.pdf]

## Supplemental Material

### **Transcriptome-wide identification of coding and noncoding RNA-binding proteins defines the comprehensive RNA interactome of *Leishmania mexicana***

Karunakaran Kalesh,<sup>a\*</sup> Wenbin Wei,<sup>b</sup> Brian S. Mantilla,<sup>b</sup> Theodoros I. Roumeliotis,<sup>c</sup> Jyoti Choudhary,<sup>c</sup> Paul W. Denny<sup>b</sup>

<sup>a</sup>Department of Chemistry, Durham University, Durham, United Kingdom

<sup>b</sup>Department of Biosciences, Durham University, Durham, United Kingdom

<sup>c</sup>Functional Proteomics Group, The Institute of Cancer Research, London, United Kingdom

\*Address correspondence to Karunakaran Kalesh, [kalesh.karunakaran@durham.ac.uk](mailto:kalesh.karunakaran@durham.ac.uk)

FIG S1

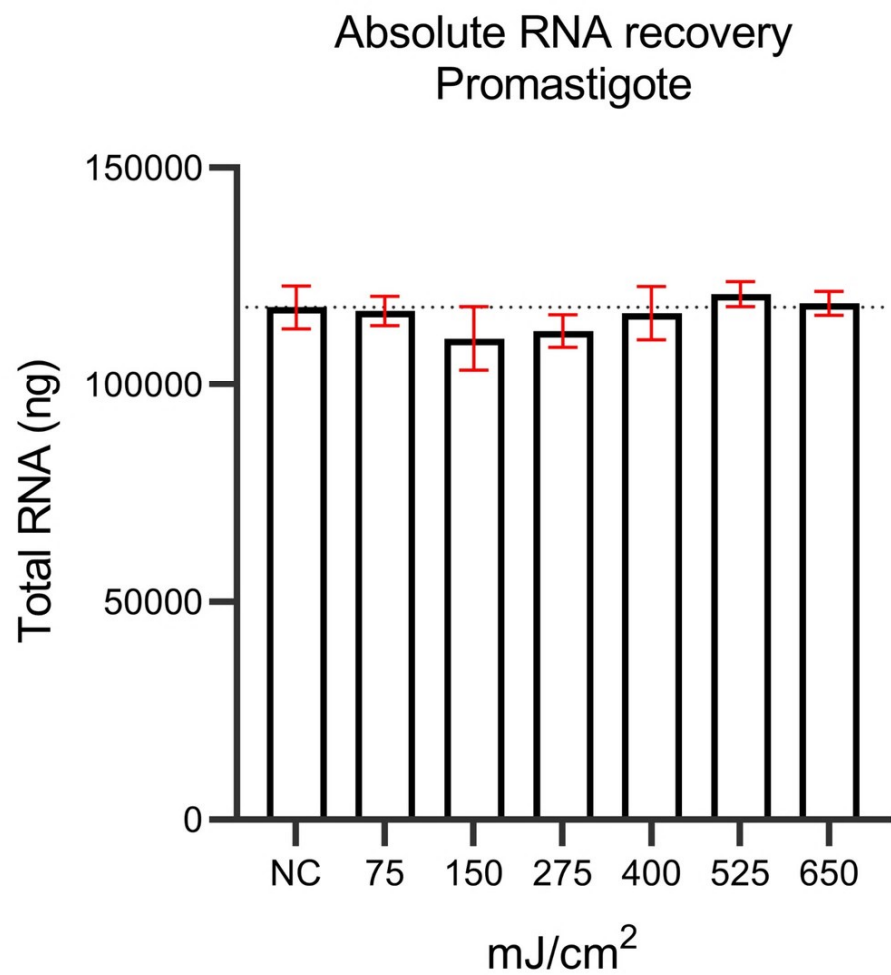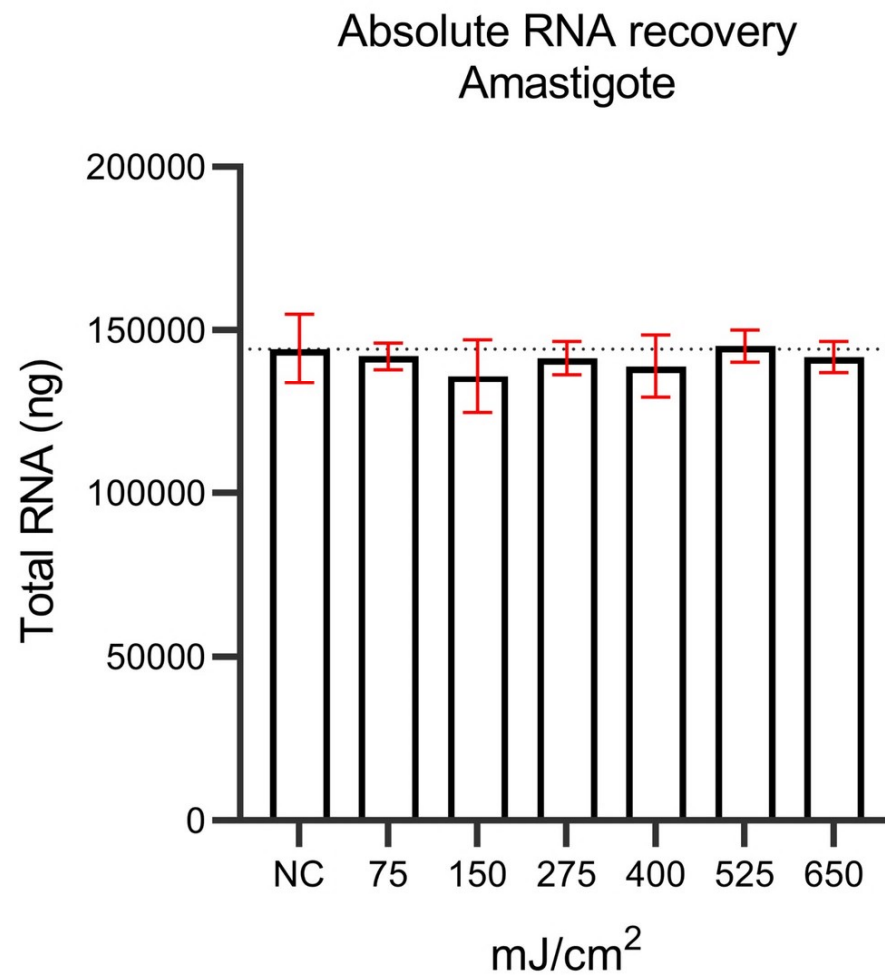

FIG S2 A

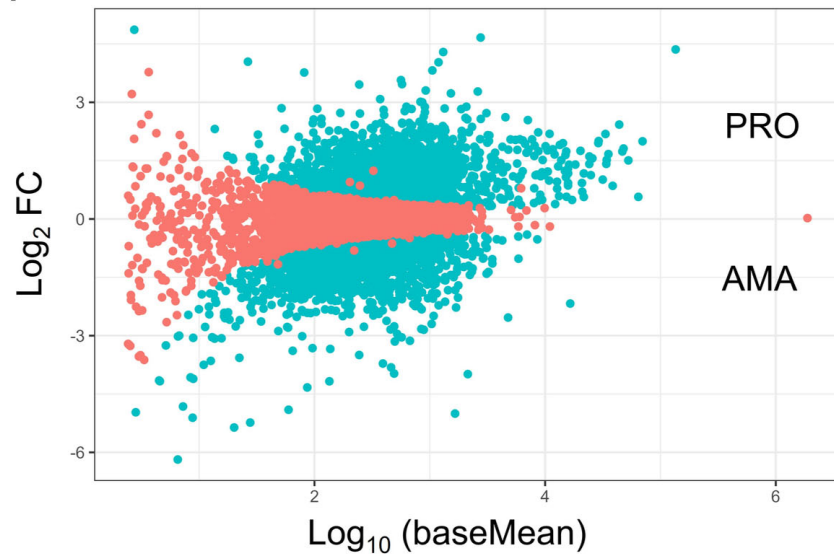

B

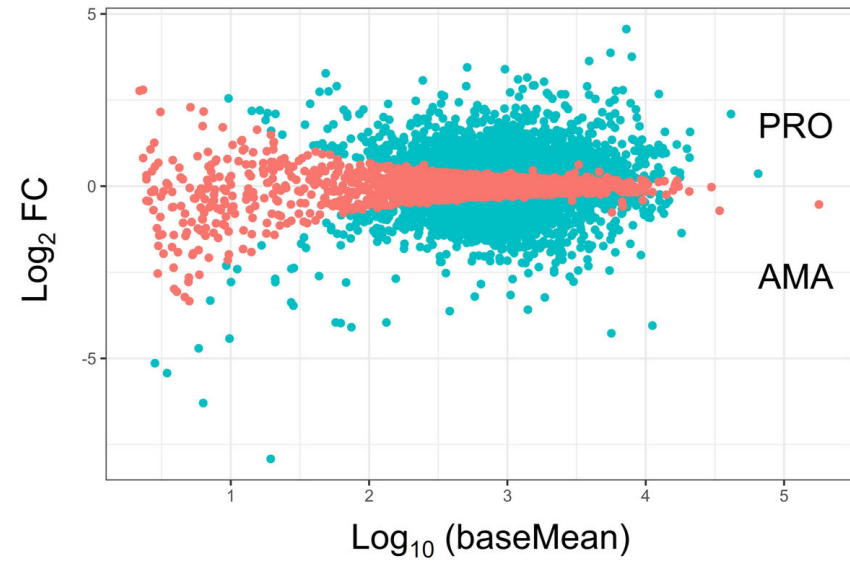

C

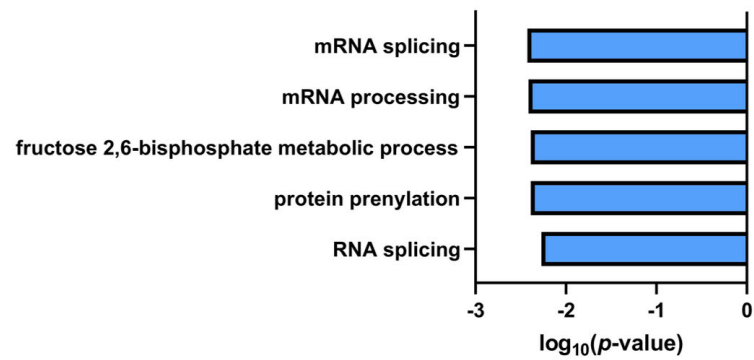

D

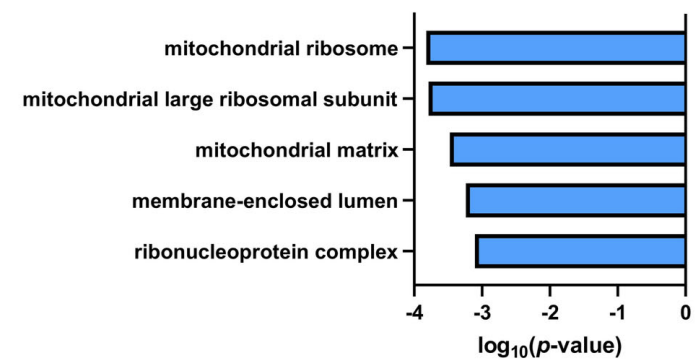

E

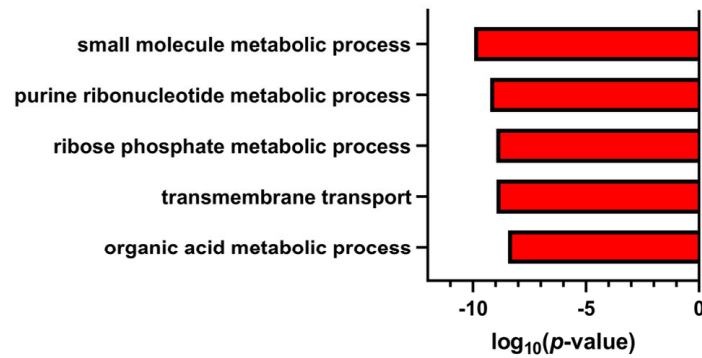

F

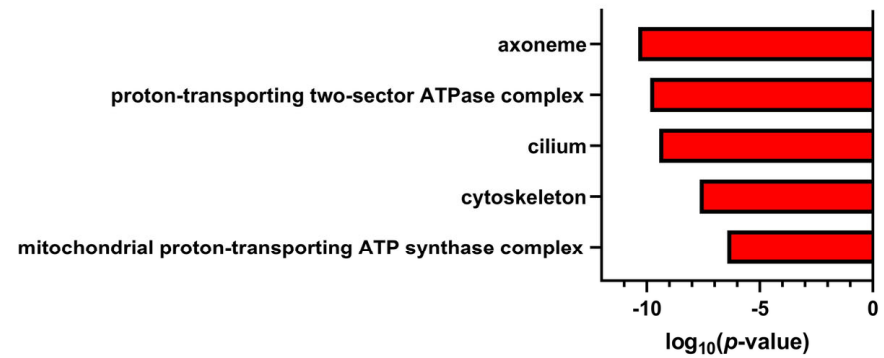

FIG S3

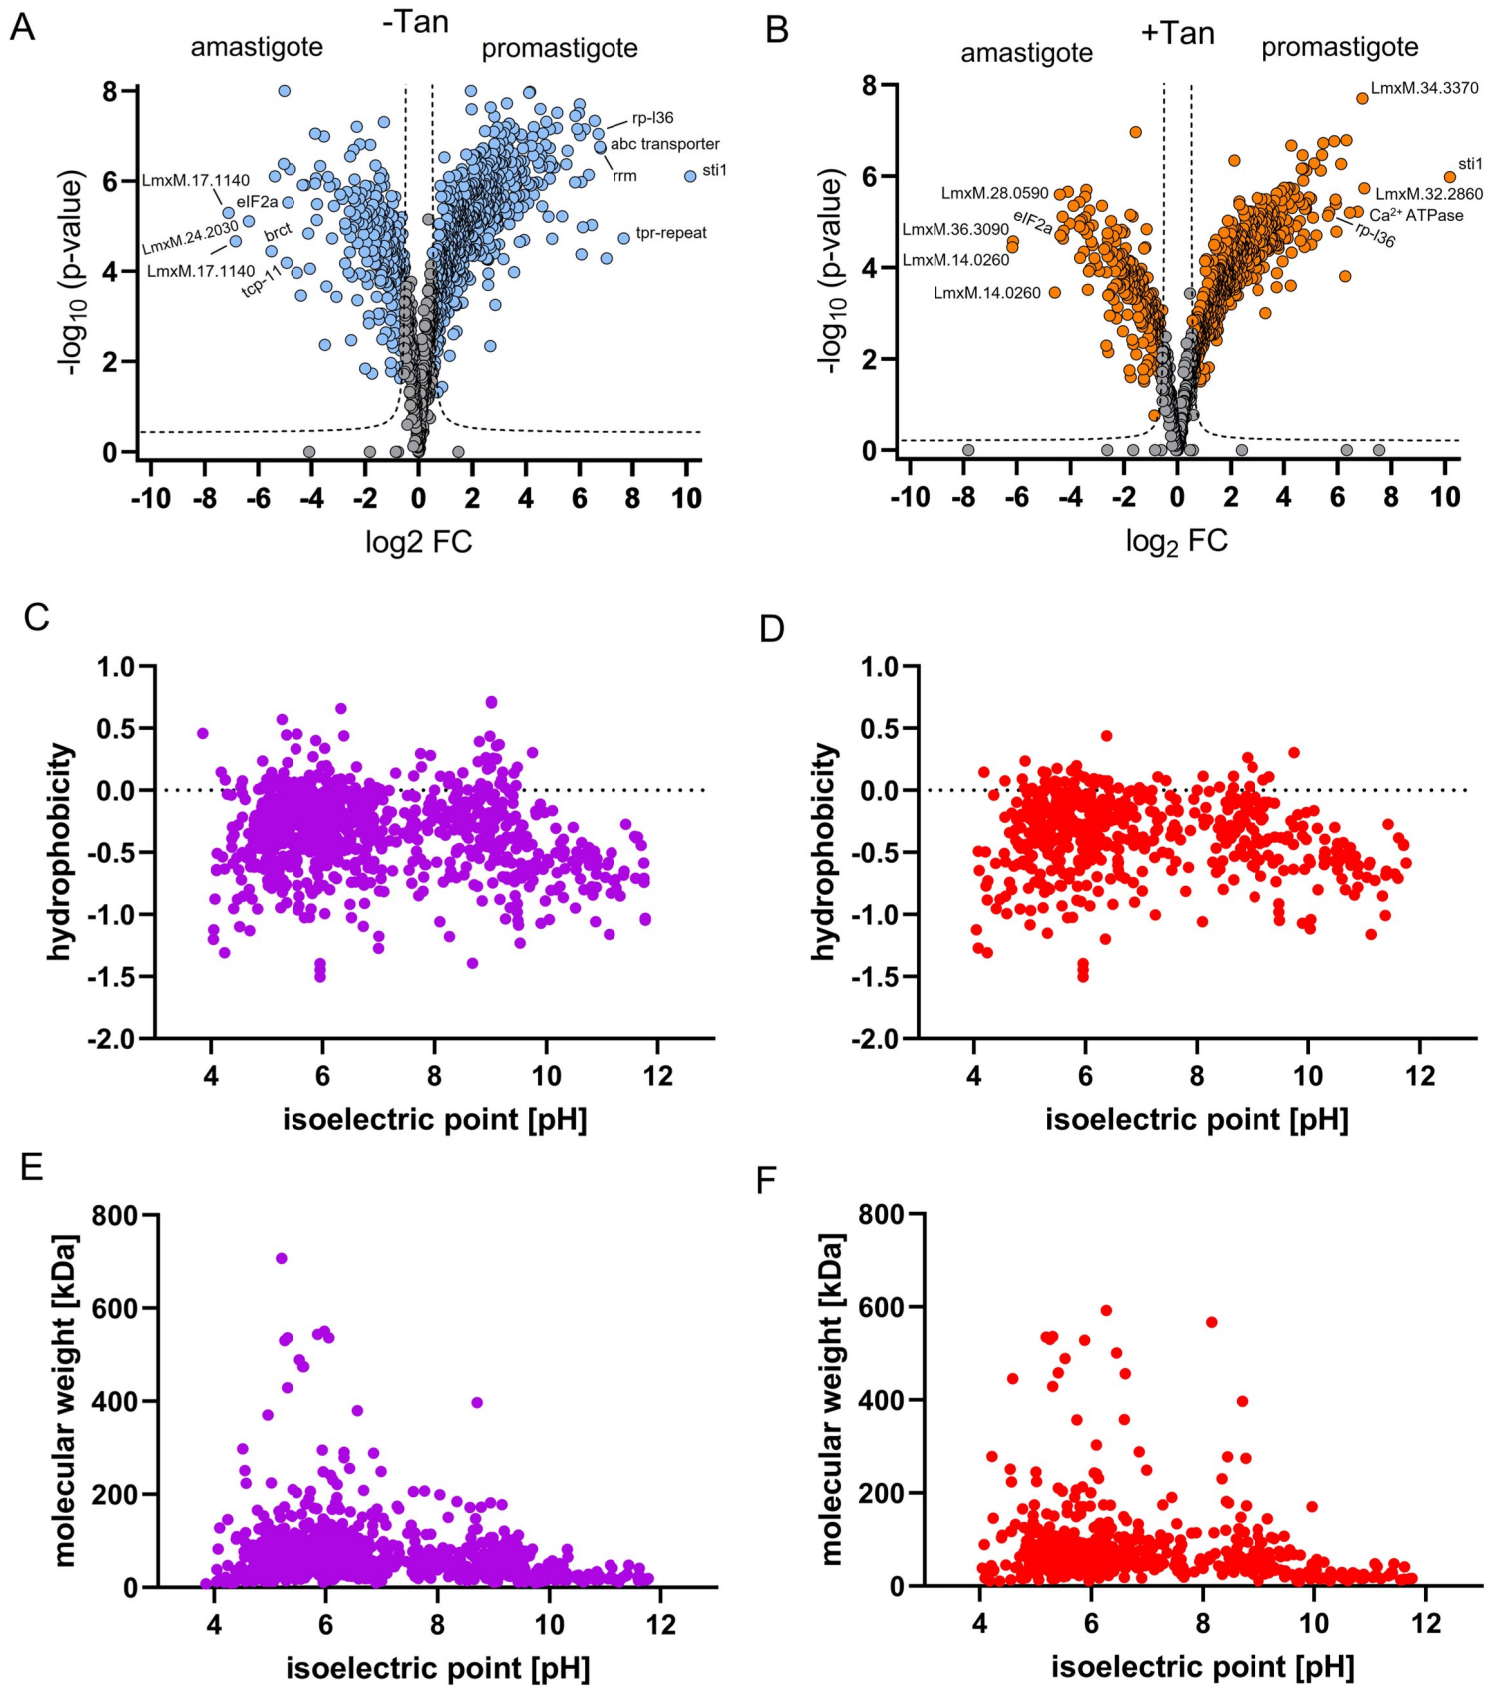

## SUPPLEMENTAL FIGURE LEGEND

**FIG. S1** Absolute quantification of the total recovered RNA (PBR + free RNA) in *L. mexicana* promastigotes and axenic amastigotes. Data shown as mean +/- SD of three independent experiments.

**FIG. S2** Differential gene expression analysis of RNA-seq data sets in *L. mexicana*. Scatter plots of mean of normalised read counts in log-scale ( $\log_{10}$  baseMean) versus  $\log_2$  fold change ( $\log_2$  FC) for promastigote (PRO) versus axenic amastigote (AMA) samples of NC (A) and CL (B) conditions with statistically significant hits ( $P_{\text{adj}} < 0.05$ ) shown in blue. BP and CC GO-Term enrichment analyses of the transcripts with significant ( $P_{\text{adj}} < 0.05$ ) differential expression between the two life cycle stages in the CL samples of axenic amastigotes (C and D) and promastigotes (E and F) respectively.

**FIG. S3** Tanespimycin affects the RBPs of *L. mexicana*. Volcano plots showing differential enrichment of RBPs in the promastigote and axenic amastigote life cycle stages of *L. mexicana* with vehicle (DMSO) treatment (A) and with tanespimycin (1  $\mu\text{M}$  for 16 h) treatment (B). A modified *t*-test with permutation based FDR statistics (250 permutations, FDR = 0.05) was applied to compare the +Tan and -Tan groups. (C) and (D), Scatter plots comparing isoelectric points and hydrophobicity of proteins in promastigotes and amastigotes respectively. (E) and (F) Scatter plots comparing isoelectric points and molecular weight of proteins in promastigotes and amastigotes respectively.

## Table Legends

**TABLE S1** Total RBPs identified with two or more unique peptides in *L. mexicana* promastigotes. The fold change (FC) of CL samples versus NC samples in log<sub>2</sub> scale and statistical significance of the reporter intensity quantifications across three independent replicates of CL versus NC samples as negative log of *t*-test P-values are also presented.

**TABLE S2.** Total RBPs identified with two or more unique peptides in *L. mexicana* axenic amastigotes. The fold change (FC) of CL samples versus NC samples in log<sub>2</sub> scale and statistical significance of the reporter intensity quantifications across three independent replicates of CL versus NC samples as negative log of *t*-test P-values are also presented.

**TABLE S3** *L. mexicana* poly(A) interactomes.

**TABLE S4** *L. mexicana* non-poly(A) interactomes.

**TABLE S5** Protein kinase genes identified in the CL transcripts of *L. mexicana* axenic amastigotes.

**TABLE S6** Protein kinase genes identified in the CL transcripts of *L. mexicana* promastigotes.

**TABLE S7** High-confidence tanespimycin-affected RBPs of *L. mexicana* promastigotes. Ribosomal proteins, proteasomal proteins and translation factors are highlighted in red, blue, and green respectively.

**TABLE S8** High-confidence tanespimycin-affected RBPs of *L. mexicana* axenic amastigotes. Ribosomal proteins, proteasomal proteins and translation factors are highlighted in red, blue, and green respectively.

**TABLE S9** Top-10 MF, CC and BP GO-Terms enriched in the tanespimycin-affected RBPs of *L. mexicana*.

**TABLE S10** Effect of tanespimycin on the RBPs of *L. mexicana* promastigotes compared with the effect on the synthesis of the nascent proteins revealed by BONCAT-iTRAQ quantitative proteomic MS (ref. 32). An increase (positive value of log<sub>2</sub> FC) or decrease (negative value of log<sub>2</sub> FC) of RNA-binding upon tanespimycin-treatment quantified by the MS3 dataset of the OOPS-TMTsixplex-LC/MS/MS is compared with the change in abundance of the nascent proteins revealed by the BONCAT-iTRAQ quantitative proteomic MS data set. Positively and negatively correlated RBPs are highlighted in blue and orange respectively.

Table S1. RBPs in *L. mexicana* promastigotes

| [-Log(P-value)] | log2 FC  | Protein IDs | Fasta headers                                                 | Unique peptides |
|-----------------|----------|-------------|---------------------------------------------------------------|-----------------|
| 1.961848106     | 7.299253 | E9AZ49      | tr E9AZ49 E9AZ49_LEIMU Uncharacterized protein OS=Leishm      | 2               |
| 4.878329476     | 7.008324 | E9AST6      | tr E9AST6 E9AST6_LEIMU Putative universal minicircle sequen   | 7               |
| 2.301493551     | 6.887898 | E9AUE0      | tr E9AUE0 E9AUE0_LEIMU DNA-directed RNA polymerase sub        | 2               |
| 3.656637374     | 6.581095 | E9ATA6      | tr E9ATA6 E9ATA6_LEIMU Putative 60S ribosomal protein L22     | 6               |
| 2.571398557     | 6.517256 | E9ASIO;E9A  | tr E9ASIO E9ASIO_LEIMU Putative ubiquitin/ribosomal protein   | 2               |
| 2.832939773     | 6.438545 | E9AXF0      | sp E9AXF0 IF5A_LEIMU Eukaryotic translation initiation factor | 4               |
| 2.142478368     | 6.391259 | E9AKC3      | tr E9AKC3 E9AKC3_LEIMU Uncharacterized protein OS=Leishm      | 2               |
| 3.368120282     | 6.368167 | E9AXI7      | tr E9AXI7 E9AXI7_LEIMU Uncharacterized protein OS=Leishma     | 3               |
| 3.998190677     | 6.309788 | E9AZ22;E9A  | tr E9AZ22 E9AZ22_LEIMU Putative histone H1 OS=Leishmania      | 3               |
| 3.163120188     | 6.146287 | E9B259      | tr E9B259 E9B259_LEIMU Putative calreticulin OS=Leishmania    | 4               |
| 3.026044848     | 6.09926  | E9AQA3      | tr E9AQA3 E9AQA3_LEIMU Tryparedoxin peroxidase OS=Leish       | 2               |
| 3.268432814     | 6.057908 | E9ARS6      | tr E9ARS6 E9ARS6_LEIMU Putative pumilio protein OS=Leishm     | 3               |
| 3.501259919     | 5.960386 | E9ARF9      | tr E9ARF9 E9ARF9_LEIMU Putative RNA-binding protein OS=Le     | 7               |
| 3.183339046     | 5.886726 | E9AMC0      | tr E9AMC0 E9AMC0_LEIMU Uncharacterized protein OS=Leish       | 3               |
| 3.822504621     | 5.851223 | E9B665      | tr E9B665 E9B665_LEIMU Putative 60S ribosomal protein L5 O    | 13              |
| 3.467393289     | 5.788977 | E9B721      | tr E9B721 E9B721_LEIMU Uncharacterized protein OS=Leishm      | 4               |
| 3.104835434     | 5.723198 | E9B1A6      | tr E9B1A6 E9B1A6_LEIMU Uncharacterized protein OS=Leishm      | 5               |
| 2.746713821     | 5.721594 | E9AQ02      | tr E9AQ02 E9AQ02_LEIMU NADH-cytochrome b5 reductase O'        | 2               |
| 3.80266801      | 5.675918 | E9B4X4      | tr E9B4X4 E9B4X4_LEIMU Uncharacterized protein OS=Leishm      | 8               |
| 3.130564033     | 5.667205 | E9AQE5;B8   | tr E9AQE5 E9AQE5_LEIMU Phosphodiesterase OS=Leishmania        | 2               |
| 2.924017189     | 5.655875 | E9B6F3      | tr E9B6F3 E9B6F3_LEIMU Galactokinase-like protein OS=Leishi   | 5               |
| 4.007541933     | 5.621325 | E9B3G8      | tr E9B3G8 E9B3G8_LEIMU Putative 60S ribosomal protein L2 C    | 12              |
| 3.128585319     | 5.616306 | E9AN31      | tr E9AN31 E9AN31_LEIMU Uncharacterized protein OS=Leishn      | 2               |
| 3.461752469     | 5.605793 | E9AK09      | tr E9AK09 E9AK09_LEIMU Uncharacterized protein OS=Leishm      | 2               |
| 3.978033564     | 5.60487  | E9AU61      | tr E9AU61 E9AU61_LEIMU Putative chaperone protein DNAj O      | 2               |
| 3.527433485     | 5.587635 | E9B303      | tr E9B303 E9B303_LEIMU Uncharacterized protein OS=Leishm      | 3               |
| 4.097576667     | 5.569937 | E9AW05      | tr E9AW05 E9AW05_LEIMU Peptidyl-prolyl cis-trans isomerase    | 3               |
| 3.607217518     | 5.553515 | E9AL77      | tr E9AL77 E9AL77_LEIMU Uncharacterized protein OS=Leishm:     | 6               |
| 3.676200758     | 5.529841 | E9B612      | tr E9B612 E9B612_LEIMU Uncharacterized protein OS=Leishm      | 2               |
| 3.726326694     | 5.525297 | E9AVM6      | tr E9AVM6 E9AVM6_LEIMU Putative 40S ribosomal protein S1      | 3               |
| 3.352228018     | 5.520797 | E9B3B7      | tr E9B3B7 E9B3B7_LEIMU Uncharacterized protein OS=Leishm      | 2               |
| 3.845791121     | 5.50551  | E9APW9      | tr E9APW9 E9APW9_LEIMU Uncharacterized protein OS=Leish       | 2               |
| 3.887356828     | 5.48731  | E9B469      | tr E9B469 E9B469_LEIMU Putative udp-glc 4-epimerase OS=Le     | 4               |
| 4.097149434     | 5.485994 | E9B6W8      | tr E9B6W8 E9B6W8_LEIMU Uncharacterized protein OS=Leish       | 3               |
| 3.64863245      | 5.464754 | E9AY76      | tr E9AY76 E9AY76_LEIMU Uncharacterized protein OS=Leishm      | 2               |
| 3.868565312     | 5.411219 | E9ARW1      | tr E9ARW1 E9ARW1_LEIMU Putative fibrillarin OS=Leishmania     | 6               |
| 3.824897764     | 5.409145 | E9AK40;A0   | tr E9AK40 E9AK40_LEIMU Putative spermidine synthase OS=Le     | 2               |
| 3.514571721     | 5.409109 | E9AS19      | tr E9AS19 E9AS19_LEIMU Putative U3 snoRNA-associated prot     | 2               |
| 4.153912396     | 5.392574 | E9AVY4      | tr E9AVY4 E9AVY4_LEIMU Putative 40S ribosomal protein L14     | 6               |
| 4.071001088     | 5.388751 | E9AKE4      | tr E9AKE4 E9AKE4_LEIMU Putative microtubule-associated prc    | 8               |
| 4.041881701     | 5.377602 | E9AYI0      | tr E9AYI0 E9AYI0_LEIMU Uncharacterized protein OS=Leishma     | 2               |
| 3.330216081     | 5.372909 | E9AXW8      | tr E9AXW8 E9AXW8_LEIMU Putative serine/threonine-protein      | 4               |
| 3.646984762     | 5.369988 | E9B6T1      | tr E9B6T1 E9B6T1_LEIMU RNA helicase OS=Leishmania mexica      | 2               |
| 4.044189534     | 5.365204 | E9ARG7      | tr E9ARG7 E9ARG7_LEIMU Uncharacterized protein OS=Leishn      | 2               |
| 3.758191067     | 5.35443  | E9APY5      | tr E9APY5 E9APY5_LEIMU Putative tyrosyl-tRNA synthetase OS    | 3               |
| 3.576533476     | 5.339412 | E9B5Y1;E9B  | tr E9B5Y1 E9B5Y1_LEIMU Putative casein kinase OS=Leishman     | 6               |
| 3.187094803     | 5.30895  | E9B600      | tr E9B600 E9B600_LEIMU Uncharacterized protein OS=Leishm      | 4               |
| 3.890759562     | 5.306946 | E9B4K7      | tr E9B4K7 E9B4K7_LEIMU Uncharacterized protein (Fragment)     | 3               |



|             |          |            |                                                              |    |
|-------------|----------|------------|--------------------------------------------------------------|----|
| 4.750000244 | 5.291805 | E9B2L1     | tr E9B2L1 E9B2L1_LEIMU Phenylalanyl-tRNA synthetase alpha    | 4  |
| 3.666692982 | 5.291691 | E9ANS8     | tr E9ANS8 E9ANS8_LEIMU Proteasome subunit beta OS=Leish      | 2  |
| 3.533555353 | 5.291658 | E9AUR8     | tr E9AUR8 E9AUR8_LEIMU Putative calpain-like cysteine pepti  | 3  |
| 3.978648038 | 5.286392 | E9ATX7     | tr E9ATX7 E9ATX7_LEIMU Putative branch point binding prote   | 3  |
| 4.488930376 | 5.280318 | E9ALD1     | tr E9ALD1 E9ALD1_LEIMU Proteasome regulatory non-ATP-ase     | 3  |
| 4.247058987 | 5.279893 | E9AMI1     | tr E9AMI1 E9AMI1_LEIMU Stress-induced protein sti1 OS=Leis   | 11 |
| 3.843594817 | 5.275613 | E9AWI0     | tr E9AWI0 E9AWI0_LEIMU Pyridoxal phosphate homeostasis p     | 3  |
| 3.617907431 | 5.275589 | E9AZ74     | tr E9AZ74 E9AZ74_LEIMU Uncharacterized protein OS=Leishm     | 3  |
| 4.082518479 | 5.272299 | E9AV53     | tr E9AV53 E9AV53_LEIMU Uncharacterized protein OS=Leishr     | 2  |
| 3.920527618 | 5.269508 | E8NHK6     | tr E8NHK6 E8NHK6_LEIMU WGS CADB00000000 data, contig 5       | 4  |
| 4.1299361   | 5.266336 | E9AMY4     | tr E9AMY4 E9AMY4_LEIMU Putative paraflagellar rod compon     | 3  |
| 4.605822151 | 5.25968  | E9B0I7     | tr E9B0I7 E9B0I7_LEIMU Ribosome biogenesis regulatory prot   | 4  |
| 4.083532584 | 5.256313 | E8NHE3     | tr E8NHE3 E8NHE3_LEIMU Putative 60S ribosomal protein L28    | 6  |
| 4.518419851 | 5.249299 | E9ARF8     | tr E9ARF8 E9ARF8_LEIMU Uncharacterized protein OS=Leishm     | 5  |
| 4.317122354 | 5.246743 | E9ASM7     | tr E9ASM7 E9ASM7_LEIMU Putative ribosomal protein L24 OS     | 4  |
| 2.928252176 | 5.237494 | E9B207     | tr E9B207 E9B207_LEIMU Uncharacterized protein OS=Leishm     | 4  |
| 3.724542359 | 5.228003 | E9ASR3     | tr E9ASR3 E9ASR3_LEIMU Putative translation elongation fact  | 7  |
| 3.936369798 | 5.222464 | E9ALB6     | tr E9ALB6 E9ALB6_LEIMU Putative nucleolar RNA-binding prot   | 7  |
| 4.560724006 | 5.22188  | E9B0V3     | tr E9B0V3 E9B0V3_LEIMU Uncharacterized protein OS=Leishm     | 4  |
| 4.198893413 | 5.206586 | E9AV21     | tr E9AV21 E9AV21_LEIMU Putative la RNA binding protein OS=   | 8  |
| 4.427065644 | 5.201057 | E9ASC2     | tr E9ASC2 E9ASC2_LEIMU Putative PUF1 OS=Leishmania mexic     | 5  |
| 3.50851126  | 5.196866 | E9AKJ8     | tr E9AKJ8 E9AKJ8_LEIMU Putative paraflagellar rod protein OS | 2  |
| 3.756026663 | 5.194477 | E9AQL0     | tr E9AQL0 E9AQL0_LEIMU Uncharacterized protein OS=Leishr     | 4  |
| 4.158798399 | 5.194172 | E9AJK8     | tr E9AJK8 E9AJK8_LEIMU Uncharacterized protein OS=Leishma    | 2  |
| 3.738681102 | 5.191606 | E9B0C5     | tr E9B0C5 E9B0C5_LEIMU Uncharacterized protein LMXM_28_      | 10 |
| 4.260478406 | 5.189936 | E9ALY9     | tr E9ALY9 E9ALY9_LEIMU Guanine deaminase OS=Leishmania       | 3  |
| 3.583958698 | 5.189722 | E9AQ39     | tr E9AQ39 E9AQ39_LEIMU Putative 60S acidic ribosomal prote   | 2  |
| 4.592335279 | 5.186861 | E9AV37     | tr E9AV37 E9AV37_LEIMU Putative ribonuclease L inhibitor OS  | 3  |
| 3.895340556 | 5.176087 | E9AWM7     | tr E9AWM7 E9AWM7_LEIMU Putative aspartate aminotransfe       | 3  |
| 4.000965525 | 5.173402 | E9AT36     | tr E9AT36 E9AT36_LEIMU Putative membrane-bound acid phc      | 9  |
| 3.887678101 | 5.168729 | E9AR18     | tr E9AR18 E9AR18_LEIMU Uncharacterized protein OS=Leishm     | 2  |
| 4.155726504 | 5.166524 | E9ARZ6     | tr E9ARZ6 E9ARZ6_LEIMU Putative nucleosome assembly prot     | 9  |
| 4.586434751 | 5.158922 | E9AZL5     | tr E9AZL5 E9AZL5_LEIMU 40S ribosomal protein S26 OS=Leish    | 8  |
| 4.246735094 | 5.157225 | E9AQS3     | tr E9AQS3 E9AQS3_LEIMU Tyrosyl or methionyl-tRNA synthet     | 4  |
| 4.115383177 | 5.151414 | E9AMM0     | tr E9AMM0 E9AMM0_LEIMU Uncharacterized protein OS=Leis       | 2  |
| 3.783832104 | 5.147222 | E9B602     | tr E9B602 E9B602_LEIMU Putative short chain dehydrogenase    | 4  |
| 3.918387097 | 5.140332 | E9AZP7     | tr E9AZP7 E9AZP7_LEIMU Putative RNA binding protein rbp16    | 3  |
| 4.460590846 | 5.121853 | E9ANS3     | tr E9ANS3 E9ANS3_LEIMU Uncharacterized protein OS=Leishr     | 3  |
| 4.287780618 | 5.12184  | E9B6J0     | tr E9B6J0 E9B6J0_LEIMU Uncharacterized protein OS=Leishma    | 2  |
| 4.199276917 | 5.120982 | E9B5P1;Q27 | tr E9B5P1 E9B5P1_LEIMU Pyruvate kinase OS=Leishmania me      | 8  |
| 3.848392249 | 5.115545 | E9APM8     | tr E9APM8 E9APM8_LEIMU Putative threonine synthase OS=L      | 4  |
| 4.323606951 | 5.114866 | E9AM64     | tr E9AM64 E9AM64_LEIMU Uncharacterized protein OS=Leish      | 2  |
| 4.249655984 | 5.110454 | E9AKP0     | tr E9AKP0 E9AKP0_LEIMU Peptidyl-prolyl cis-trans isomerase ( | 5  |
| 3.770498192 | 5.105175 | E9AVA8     | tr E9AVA8 E9AVA8_LEIMU Uncharacterized protein OS=Leishn     | 3  |
| 4.104110563 | 5.101669 | E9B2G1     | tr E9B2G1 E9B2G1_LEIMU Putative ATP-dependent RNA helica     | 25 |
| 3.752098844 | 5.08529  | E9B3U1;E9A | tr E9B3U1 E9B3U1_LEIMU Uncharacterized protein OS=Leishr     | 2  |
| 3.953527303 | 5.081966 | E9B5Y8     | tr E9B5Y8 E9B5Y8_LEIMU Uncharacterized protein OS=Leishm     | 4  |
| 4.073967018 | 5.081666 | E9AUU6     | tr E9AUU6 E9AUU6_LEIMU Putative 40S ribosomal protein S1:    | 12 |
| 3.376333407 | 5.073589 | E9AYS1     | tr E9AYS1 E9AYS1_LEIMU Proteasome endopeptidase comple       | 4  |
| 4.065646552 | 5.066343 | E9ARX5     | tr E9ARX5 E9ARX5_LEIMU Uncharacterized protein OS=Leishr     | 6  |
| 4.162697104 | 5.061596 | E9B687     | tr E9B687 E9B687_LEIMU Putative kinesin OS=Leishmania me     | 3  |
| 3.405917997 | 5.054957 | E9AKN1;Q6: | tr E9AKN1 E9AKN1_LEIMU Uncharacterized protein OS=Leishn     | 4  |

|             |          |            |                        |                                        |    |
|-------------|----------|------------|------------------------|----------------------------------------|----|
| 4.307172169 | 5.048908 | E9AQ06     | tr E9AQ06 E9AQ06_LEIMU | Heat shock protein HslVU, ATPase       | 3  |
| 3.824538645 | 5.046888 | E9ALI7     | tr E9ALI7 E9ALI7_LEIMU | Putative 60S ribosomal protein L39 O   | 2  |
| 4.15596028  | 5.046    | E9AN29     | tr E9AN29 E9AN29_LEIMU | Putative nucleolar protein OS=Leish    | 20 |
| 4.523905366 | 5.043848 | E9B479     | tr E9B479 E9B479_LEIMU | Putative GTPase protein OS=Leishm      | 2  |
| 4.915040033 | 5.040745 | E9AZ87     | tr E9AZ87 E9AZ87_LEIMU | Paraflagellar rod protein-like proteir | 2  |
| 4.34582652  | 5.038066 | E9AZZ3     | tr E9AZZ3 E9AZZ3_LEIMU | Uncharacterized protein OS=Leishm      | 3  |
| 4.285283362 | 5.027549 | E9B379     | tr E9B379 E9B379_LEIMU | ATP binding protein-like protein OS=   | 2  |
| 3.662978239 | 5.022456 | E9ALX2     | tr E9ALX2 E9ALX2_LEIMU | Uncharacterized protein OS=Leishm      | 4  |
| 3.687566601 | 5.020907 | E9B701     | tr E9B701 E9B701_LEIMU | Glycine cleavage system H protein C    | 2  |
| 3.977236312 | 5.01287  | Q95NJ3;E8M | tr Q95NJ3 Q95NJ3_LEIAM | Activated C kinase protein OS=Leish    | 9  |
| 4.021747268 | 5.011844 | E9B163     | tr E9B163 E9B163_LEIMU | Putative aldehyde dehydrogenase O      | 9  |
| 4.304645309 | 5.009508 | E9AZ16     | tr E9AZ16 E9AZ16_LEIMU | Putative intraflagellar transport prot | 2  |
| 4.190669139 | 5.007537 | E9APS5     | tr E9APS5 E9APS5_LEIMU | Uncharacterized protein OS=Leishm      | 4  |
| 4.238616268 | 5.004729 | E9AP12     | tr E9AP12 E9AP12_LEIMU | Uncharacterized protein OS=Leishm      | 9  |
| 4.501567933 | 5.004177 | E9AQ75     | tr E9AQ75 E9AQ75_LEIMU | Uncharacterized protein OS=Leishn      | 4  |
| 3.86007851  | 5.003963 | E9AUD1;A7  | tr E9AUD1 E9AUD1_LEIMU | Protein disulfide-isomerase OS=Lei     | 18 |
| 3.716055788 | 5.002199 | E9AL45     | tr E9AL45 E9AL45_LEIMU | Putative ATP-dependent DEAD/H RN       | 11 |
| 4.222572164 | 5.001174 | E9B201;E9B | tr E9B201 E9B201_LEIMU | Succinyl-diaminopimelate desucciny     | 4  |
| 3.811061228 | 4.999202 | E9AVX7     | tr E9AVX7 E9AVX7_LEIMU | Peptidyl-prolyl cis-trans isomerase (  | 2  |
| 3.689804475 | 4.995602 | E9B5M4     | tr E9B5M4 E9B5M4_LEIMU | H/ACA ribonucleoprotein complex        | 3  |
| 4.349384635 | 4.993931 | E9AWJ4     | tr E9AWJ4 E9AWJ4_LEIMU | Putative 60S ribosomal protein L17     | 10 |
| 4.251463452 | 4.991558 | E9AYA3;Q2! | tr E9AYA3 E9AYA3_LEIMU | Heat shock protein 70-related prote    | 20 |
| 4.223360727 | 4.988526 | E9B2C2     | tr E9B2C2 E9B2C2_LEIMU | Uncharacterized protein OS=Leishm      | 14 |
| 3.963742903 | 4.988015 | E9B5R8     | tr E9B5R8 E9B5R8_LEIMU | Uncharacterized protein OS=Leishm      | 2  |
| 4.260972879 | 4.986053 | E9AS20;E9A | tr E9AS20 E9AS20_LEIMU | Putative kinesin OS=Leishmania me      | 3  |
| 4.117147702 | 4.982308 | E9AVQ7     | tr E9AVQ7 E9AVQ7_LEIMU | Uncharacterized protein OS=Leishr      | 15 |
| 3.320567701 | 4.977921 | E9B4L7     | tr E9B4L7 E9B4L7_LEIMU | Putative importin beta-1 subunit OS=   | 3  |
| 4.415838227 | 4.976337 | E9AN72     | tr E9AN72 E9AN72_LEIMU | Uncharacterized protein OS=Leishn      | 5  |
| 4.386471838 | 4.974044 | E9AYP5     | tr E9AYP5 E9AYP5_LEIMU | Uncharacterized protein OS=Leishm      | 4  |
| 4.148556769 | 4.971588 | E9ALH7     | tr E9ALH7 E9ALH7_LEIMU | Putative 60S ribosomal protein L13     | 16 |
| 4.973464879 | 4.971583 | E9B5C7     | tr E9B5C7 E9B5C7_LEIMU | Glucose-6-phosphate 1-epimerase C      | 4  |
| 4.44676729  | 4.969713 | E9APK7;A0/ | tr E9APK7 E9APK7_LEIMU | Nucleoside hydrolase-like protein O    | 5  |
| 3.854008556 | 4.966382 | E9B5R2     | tr E9B5R2 E9B5R2_LEIMU | 60S ribosomal protein L30 OS=Leish     | 8  |
| 3.879850052 | 4.964643 | E9B1X5     | tr E9B1X5 E9B1X5_LEIMU | Nucleosome assembly protein-like p     | 7  |
| 4.140163336 | 4.962327 | E9B533;E9A | tr E9B533 E9B533_LEIMU | Putative ribosomal protein l35a OS=    | 7  |
| 4.00172119  | 4.962106 | E9B072     | tr E9B072 E9B072_LEIMU | Eukaryotic translation initiation fact | 3  |
| 4.048886136 | 4.9513   | E9ASX8     | tr E9ASX8 E9ASX8_LEIMU | Chaperonin HSP60, mitochondrial O      | 10 |
| 4.682723219 | 4.947998 | E9B2G7     | tr E9B2G7 E9B2G7_LEIMU | Putative prostaglandin f synthase O    | 2  |
| 3.870579971 | 4.946743 | E9B6H7     | tr E9B6H7 E9B6H7_LEIMU | Putative chaperone protein DNAj O      | 6  |
| 3.766786548 | 4.945303 | E9AL62;E9A | tr E9AL62 E9AL62_LEIMU | Putative 60S ribosomal protein L7a C   | 22 |
| 4.533531932 | 4.945115 | E9B0K5     | tr E9B0K5 E9B0K5_LEIMU | Mitochondrial oligo_U binding prote    | 3  |
| 4.670639953 | 4.944896 | E9AZN5     | tr E9AZN5 E9AZN5_LEIMU | Uncharacterized protein OS=Leishr      | 3  |
| 4.552747276 | 4.943446 | E9ATF7     | tr E9ATF7 E9ATF7_LEIMU | Putative 40S ribosomal protein S27-    | 6  |
| 4.315095328 | 4.941509 | E9B473     | tr E9B473 E9B473_LEIMU | Succinyl-CoA:3-ketoacid-coenzyme /     | 9  |
| 4.37007184  | 4.934802 | E9ANP0     | tr E9ANP0 E9ANP0_LEIMU | 40S ribosomal protein S5 OS=Leishi     | 8  |
| 3.478027071 | 4.933559 | E9AQE0     | tr E9AQE0 E9AQE0_LEIMU | Proliferating cell nuclear antigen O!  | 6  |
| 4.178227756 | 4.933235 | E9AQD3     | tr E9AQD3 E9AQD3_LEIMU | Putative nucleolar RNA binding pro     | 17 |
| 3.724735036 | 4.933114 | E9ARX0     | tr E9ARX0 E9ARX0_LEIMU | Uncharacterized protein OS=Leishr      | 4  |
| 4.132377333 | 4.928553 | E9AZT9     | tr E9AZT9 E9AZT9_LEIMU | Putative glucose-regulated protein 7   | 24 |
| 4.222322313 | 4.923381 | E9AQ19     | tr E9AQ19 E9AQ19_LEIMU | Putative 60S ribosomal protein L13     | 6  |
| 4.356449947 | 4.917143 | E9AL78     | tr E9AL78 E9AL78_LEIMU | Calcium-transporting ATPase OS=Lei     | 4  |
| 4.121919073 | 4.91675  | E9B4I1;A7U | tr E9B4I1 E9B4I1_LEIMU | Malate dehydrogenase OS=Leishman       | 11 |

|             |          |             |                        |                                       |    |
|-------------|----------|-------------|------------------------|---------------------------------------|----|
| 3.555658476 | 4.915267 | E9AK98      | tr E9AK98 E9AK98_LEIMU | Putative RNA-binding protein OS=Le    | 4  |
| 4.643970996 | 4.915213 | E9AWK3      | tr E9AWK3 E9AWK3_LEIMU | Ankyrin/TPR repeat protein OS=Le      | 4  |
| 4.257242149 | 4.910129 | E9B1Y7;E9B  | tr E9B1Y7 E9B1Y7_LEIMU | Mannosyltransferase-like protein (Fi  | 4  |
| 3.869091276 | 4.908611 | E9AJD4      | tr E9AJD4 E9AJD4_LEIMU | Putative fatty acyl CoA syntetase 1 C | 5  |
| 3.557218765 | 4.906328 | E9B659      | tr E9B659 E9B659_LEIMU | Uncharacterized protein OS=Leishm     | 2  |
| 4.116474831 | 4.904662 | E9AUA1;Q8   | tr E9AUA1 E9AUA1_LEIMU | 2,3-bisphosphoglycerate-independ      | 11 |
| 4.460503283 | 4.902499 | E9AUF4      | tr E9AUF4 E9AUF4_LEIMU | Uncharacterized protein OS=Leishr     | 3  |
| 4.189375816 | 4.900973 | E9AUN5      | tr E9AUN5 E9AUN5_LEIMU | 1,2-dihydroxy-3-keto-5-methylthi      | 2  |
| 4.430441694 | 4.899571 | E9ALU2      | tr E9ALU2 E9ALU2_LEIMU | Putative carnitine/choline acetyltra  | 7  |
| 4.065912006 | 4.895404 | E9AW84      | tr E9AW84 E9AW84_LEIMU | 3-ketoacyl-CoA thiolase-like prote    | 10 |
| 4.817574526 | 4.894423 | E9B2J1      | tr E9B2J1 E9B2J1_LEIMU | Putative OSM3-like kinesin OS=Leish   | 4  |
| 3.736819548 | 4.894353 | E9ARV9      | tr E9ARV9 E9ARV9_LEIMU | Uncharacterized protein OS=Leishr     | 4  |
| 4.04704754  | 4.89185  | E9B6S6      | tr E9B6S6 E9B6S6_LEIMU | Uncharacterized protein OS=Leishm     | 4  |
| 4.47677158  | 4.891267 | E9B139      | tr E9B139 E9B139_LEIMU | Uncharacterized protein OS=Leishm     | 3  |
| 4.010853742 | 4.887659 | E9AZ13      | tr E9AZ13 E9AZ13_LEIMU | Mitochondrial RNA binding protein :   | 2  |
| 3.956920253 | 4.88659  | E9ASN4      | tr E9ASN4 E9ASN4_LEIMU | Short chain 3-hydroxyacyl-CoA dehy    | 3  |
| 4.280778958 | 4.883558 | E9B6U6      | tr E9B6U6 E9B6U6_LEIMU | Uncharacterized protein OS=Leishr     | 2  |
| 4.492932504 | 4.883326 | E9AXP1      | tr E9AXP1 E9AXP1_LEIMU | Uncharacterized protein OS=Leishm     | 4  |
| 4.331599825 | 4.880981 | E9AMV3      | tr E9AMV3 E9AMV3_LEIMU | Uncharacterized protein OS=Leish      | 7  |
| 4.05758338  | 4.878036 | E9AMW3      | tr E9AMW3 E9AMW3_LEIMU | Mitochondrial RNA binding prot        | 6  |
| 4.452800042 | 4.87787  | E9B1Q4      | tr E9B1Q4 E9B1Q4_LEIMU | Biotin/lipoate protein ligase-like pr | 7  |
| 4.637768532 | 4.875647 | E9AZ04      | tr E9AZ04 E9AZ04_LEIMU | Uncharacterized protein OS=Leishm     | 3  |
| 4.452550041 | 4.872516 | E9B146      | tr E9B146 E9B146_LEIMU | Conserved TPR domain protein OS=l     | 13 |
| 4.113569397 | 4.871903 | E9ARV4      | tr E9ARV4 E9ARV4_LEIMU | Uncharacterized protein OS=Leishr     | 5  |
| 4.209839282 | 4.871797 | E9AM03      | tr E9AM03 E9AM03_LEIMU | Putative U3 small nucleolar ribonu    | 8  |
| 4.127534175 | 4.871164 | E9AN99      | tr E9AN99 E9AN99_LEIMU | Peptidylprolyl isomerase OS=Leishr    | 4  |
| 4.438006843 | 4.870943 | E9APF9      | tr E9APF9 E9APF9_LEIMU | Uncharacterized protein OS=Leishm     | 4  |
| 4.45099943  | 4.852258 | E9AL96      | tr E9AL96 E9AL96_LEIMU | Uncharacterized protein OS=Leishm     | 2  |
| 4.214131908 | 4.850253 | E9ATK5      | tr E9ATK5 E9ATK5_LEIMU | Uncharacterized protein OS=Leishm     | 3  |
| 3.68846551  | 4.845647 | E9ALX8      | tr E9ALX8 E9ALX8_LEIMU | Uncharacterized protein OS=Leishm     | 2  |
| 3.740033297 | 4.845043 | E8NHI9;E9A  | tr E8NHI9 E8NHI9_LEIMU | WGS CADB00000000 data, contig 4C      | 2  |
| 4.24468878  | 4.844882 | E9AMG3      | tr E9AMG3 E9AMG3_LEIMU | DNA polymerase OS=Leishmania i        | 5  |
| 3.710466106 | 4.843551 | E9AM76      | tr E9AM76 E9AM76_LEIMU | Ribosomal protein L3-like protein     | 3  |
| 4.335373303 | 4.840233 | E9ALU9      | tr E9ALU9 E9ALU9_LEIMU | Uncharacterized protein OS=Leishr     | 9  |
| 5.107721323 | 4.836508 | E9ATP0      | tr E9ATP0 E9ATP0_LEIMU | Uncharacterized protein OS=Leishm     | 3  |
| 3.396566313 | 4.827153 | E9ALI5;E9Al | tr E9ALI5 E9ALI5_LEIMU | Putative kinesin OS=Leishmania mexi   | 2  |
| 4.052502906 | 4.826559 | E9B064      | tr E9B064 E9B064_LEIMU | Putative vacuolar ATP synthase subu   | 10 |
| 4.345679618 | 4.826451 | E9B1G4      | tr E9B1G4 E9B1G4_LEIMU | DNA-directed RNA polymerase subu      | 6  |
| 4.26509077  | 4.82471  | E9AVW5      | tr E9AVW5 E9AVW5_LEIMU | Uncharacterized protein OS=Leish      | 3  |
| 4.589168769 | 4.824518 | E9AM67      | tr E9AM67 E9AM67_LEIMU | Proteasome regulatory non-ATPas       | 5  |
| 3.998772115 | 4.823161 | E9AR04      | tr E9AR04 E9AR04_LEIMU | Uncharacterized protein OS=Leishm     | 3  |
| 4.843961766 | 4.820549 | E9AW21      | tr E9AW21 E9AW21_LEIMU | Putative endoribonuclease L-PSP (     | 2  |
| 4.316082115 | 4.819971 | E9B4H8      | tr E9B4H8 E9B4H8_LEIMU | Putative adenylate kinase OS=Leish    | 5  |
| 4.034788583 | 4.819025 | E9AQ14      | tr E9AQ14 E9AQ14_LEIMU | Uncharacterized protein OS=Leishn     | 4  |
| 4.803301596 | 4.818797 | E9AV56      | tr E9AV56 E9AV56_LEIMU | Methionine aminopeptidase 2 OS=l      | 5  |
| 4.308410674 | 4.817174 | E9B6U3      | tr E9B6U3 E9B6U3_LEIMU | Polyadenylate-binding protein OS=l    | 20 |
| 3.816656566 | 4.816447 | E9AVR2      | tr E9AVR2 E9AVR2_LEIMU | NADH-cytochrome b5 reductase OS       | 4  |
| 4.507252971 | 4.816055 | E9B0Y0      | tr E9B0Y0 E9B0Y0_LEIMU | Uncharacterized protein OS=Leishm     | 2  |
| 4.159890598 | 4.815881 | E9APG0      | tr E9APG0 E9APG0_LEIMU | Uncharacterized protein OS=Leishn     | 9  |
| 4.497071359 | 4.812813 | E9B049      | tr E9B049 E9B049_LEIMU | DNA topoisomerase 2 OS=Leishman       | 8  |
| 4.0472879   | 4.812383 | E9AP92      | tr E9AP92 E9AP92_LEIMU | Uncharacterized protein OS=Leishm     | 2  |
| 3.967928306 | 4.808016 | E9ARJ2      | tr E9ARJ2 E9ARJ2_LEIMU | Uncharacterized protein OS=Leishm     | 8  |

|             |          |            |                        |                                        |    |
|-------------|----------|------------|------------------------|----------------------------------------|----|
| 4.270319582 | 4.807805 | E9AZ36     | tr E9AZ36 E9AZ36_LEIMU | Uncharacterized protein OS=Leishm      | 17 |
| 5.161041422 | 4.807398 | E9ANW9     | tr E9ANW9 E9ANW9_LEIMU | Uncharacterized protein OS=Leish       | 2  |
| 4.158125437 | 4.805698 | E9ASX7     | tr E9ASX7 E9ASX7_LEIMU | Chaperonin HSP60, mitochondrial O      | 10 |
| 4.235983953 | 4.803598 | E9AMA8     | tr E9AMA8 E9AMA8_LEIMU | Superoxide dismutase OS=Leishm         | 2  |
| 4.704479833 | 4.802929 | E9B018     | tr E9B018 E9B018_LEIMU | Uncharacterized protein OS=Leishm      | 9  |
| 4.418886755 | 4.802166 | E9ASL3     | tr E9ASL3 E9ASL3_LEIMU | Putative 40S ribosomal protein S18 C   | 22 |
| 3.912925874 | 4.801332 | E9B400     | tr E9B400 E9B400_LEIMU | Peptidyl-prolyl cis-trans isomerase C  | 4  |
| 4.328833073 | 4.800188 | E9AM77     | tr E9AM77 E9AM77_LEIMU | Transcription factor-like protein O    | 29 |
| 4.273141542 | 4.799866 | E9AUQ7;E9  | tr E9AUQ7 E9AUQ7_LEIMU | Calpain-like cysteine peptidase OS     | 9  |
| 4.180301877 | 4.799721 | E9AZR7     | tr E9AZR7 E9AZR7_LEIMU | Putative ribosomal protein S20 OS=     | 5  |
| 4.453654857 | 4.798772 | E9AZ28     | tr E9AZ28 E9AZ28_LEIMU | Uncharacterized protein OS=Leishm      | 6  |
| 3.990394951 | 4.79822  | E9B2M5     | tr E9B2M5 E9B2M5_LEIMU | Chaperonin containing t-complex        | 16 |
| 4.455658549 | 4.798162 | E9APJ2     | tr E9APJ2 E9APJ2_LEIMU | Pyrroline-5-carboxylate reductase O    | 2  |
| 4.645386083 | 4.792133 | E9B609     | tr E9B609 E9B609_LEIMU | Putative ubiquitin-conjugating enzym   | 2  |
| 4.117007169 | 4.791853 | E9AQV6;H6  | tr E9AQV6 E9AQV6_LEIMU | Paraflagellar rod protein 2C OS=Lei    | 2  |
| 3.726842399 | 4.785479 | E9AWL4     | tr E9AWL4 E9AWL4_LEIMU | Putative ATP-dependent RNA helic       | 3  |
| 4.69096878  | 4.784026 | Q8MTW1;E!  | tr Q8MTW1 Q8MTW1_LEIAM | Meta 2 protein OS=Leishmania ;         | 5  |
| 5.137824634 | 4.777753 | E9ARY1     | tr E9ARY1 E9ARY1_LEIMU | Putative RNA binding protein OS=Le     | 4  |
| 4.248034813 | 4.776988 | E9AVE2     | tr E9AVE2 E9AVE2_LEIMU | Uncharacterized protein OS=Leishm      | 8  |
| 4.050729281 | 4.773046 | E9AZE9     | tr E9AZE9 E9AZE9_LEIMU | Putative heat shock protein DNAJ O     | 11 |
| 4.130179722 | 4.770829 | E9AWM1     | tr E9AWM1 E9AWM1_LEIMU | Putative fumarate hydratase OS=        | 3  |
| 5.557499299 | 4.770423 | E9AUQ2     | tr E9AUQ2 E9AUQ2_LEIMU | DNAj-like protein OS=Leishmania r      | 2  |
| 4.506284598 | 4.767295 | E9AXQ3     | tr E9AXQ3 E9AXQ3_LEIMU | Pyruvate dehydrogenase E1 compc        | 7  |
| 4.290607706 | 4.767033 | E9B544     | tr E9B544 E9B544_LEIMU | Uncharacterized protein OS=Leishm      | 2  |
| 4.132812739 | 4.765162 | E9AUV1     | tr E9AUV1 E9AUV1_LEIMU | Uncharacterized protein OS=Leishr      | 3  |
| 3.455861803 | 4.761429 | E9B1E3     | tr E9B1E3 E9B1E3_LEIMU | Uncharacterized protein OS=Leishm      | 3  |
| 3.807954584 | 4.760477 | E9AZA7;E9A | tr E9AZA7 E9AZA7_LEIMU | Branched-chain-amino-acid aminoti      | 4  |
| 5.755390779 | 4.757569 | E9B1C1     | tr E9B1C1 E9B1C1_LEIMU | Uncharacterized protein OS=Leishm      | 2  |
| 4.31506708  | 4.755695 | E9AJY3;O09 | tr E9AJY3 E9AJY3_LEIMU | Calcium-transporting ATPase OS=Leis    | 8  |
| 4.312851669 | 4.754278 | E9ASQ6     | tr E9ASQ6 E9ASQ6_LEIMU | Transitional endoplasmic reticulum     | 19 |
| 4.32069055  | 4.751569 | E9ARL1     | tr E9ARL1 E9ARL1_LEIMU | Putative elongation factor Tu OS=Le    | 7  |
| 3.989121734 | 4.750888 | E9ASJ4     | tr E9ASJ4 E9ASJ4_LEIMU | Uncharacterized protein OS=Leishma     | 8  |
| 4.163751935 | 4.749356 | E9B3P3     | tr E9B3P3 E9B3P3_LEIMU | Uncharacterized protein OS=Leishm      | 2  |
| 4.583997083 | 4.748606 | E9APPO     | tr E9APPO E9APPO_LEIMU | Uncharacterized protein OS=Leishm      | 5  |
| 4.472295356 | 4.748371 | E9B361     | tr E9B361 E9B361_LEIMU | Proteasome regulatory non-ATP-ase      | 3  |
| 4.352030393 | 4.747399 | E9AZ37     | tr E9AZ37 E9AZ37_LEIMU | Putative arginyl-tRNA synthetase OS    | 14 |
| 4.373579468 | 4.74623  | E9ARI4     | tr E9ARI4 E9ARI4_LEIMU | Uncharacterized protein OS=Leishma     | 2  |
| 4.008028998 | 4.745887 | E9B0E2     | tr E9B0E2 E9B0E2_LEIMU | Putative 2-hydroxy-3-oxopropionate     | 2  |
| 4.59234154  | 4.744819 | E9AP18     | tr E9AP18 E9AP18_LEIMU | Uncharacterized protein OS=Leishm      | 2  |
| 4.451566289 | 4.743181 | E9ATS5     | tr E9ATS5 E9ATS5_LEIMU | Uncharacterized protein OS=Leishm      | 3  |
| 4.796998591 | 4.741402 | Q25310     | tr Q25310 Q25310_LEIME | Paraflagellar rod protein 2C OS=Leis   | 2  |
| 4.411757141 | 4.740721 | E9ALK3     | tr E9ALK3 E9ALK3_LEIMU | Putative GTP-binding protein OS=Lei    | 8  |
| 4.468890962 | 4.7401   | E9AK75     | tr E9AK75 E9AK75_LEIMU | Uncharacterized protein OS=Leishm      | 4  |
| 4.281610217 | 4.737068 | E9ALI1     | tr E9ALI1 E9ALI1_LEIMU | Uncharacterized protein OS=Leishma     | 3  |
| 3.949644842 | 4.733994 | E9B5P0     | tr E9B5P0 E9B5P0_LEIMU | Pyruvate kinase (Fragment) OS=Leis     | 2  |
| 4.131132804 | 4.733792 | E9ASP6;Q9l | tr E9ASP6 E9ASP6_LEIMU | Fructose-bisphosphate aldolase OS=     | 19 |
| 4.210599153 | 4.728694 | E9B2X4     | tr E9B2X4 E9B2X4_LEIMU | Putative 1-acyl-sn-glycerol-3-phosph   | 5  |
| 3.726285463 | 4.728356 | E9APE3     | tr E9APE3 E9APE3_LEIMU | Adenylosuccinate synthetase OS=Le      | 9  |
| 3.995485466 | 4.719959 | E9AM02     | tr E9AM02 E9AM02_LEIMU | Putative lipophosphoglycan biosyr      | 8  |
| 4.241761834 | 4.719142 | E9B297     | tr E9B297 E9B297_LEIMU | Putative acetyl-CoA carboxylase OS=    | 24 |
| 4.720620709 | 4.717098 | E9B573     | tr E9B573 E9B573_LEIMU | Regulatory subunit of protein kinase   | 13 |
| 4.45685294  | 4.71664  | E9B178     | tr E9B178 E9B178_LEIMU | Eukaryotic translation initiation fact | 10 |

|             |          |            |                        |                                        |    |
|-------------|----------|------------|------------------------|----------------------------------------|----|
| 4.180188875 | 4.715325 | E9AK23     | tr E9AK23 E9AK23_LEIMU | Uncharacterized protein OS=Leishm      | 2  |
| 4.171894828 | 4.714101 | E9AUX6     | tr E9AUX6 E9AUX6_LEIMU | Uncharacterized protein OS=Leishn      | 2  |
| 4.099138416 | 4.713525 | E9AMZ4     | tr E9AMZ4 E9AMZ4_LEIMU | Uncharacterized protein OS=Leish       | 4  |
| 4.298055191 | 4.712246 | E9B170;Q27 | tr E9B170 E9B170_LEIMU | Glyceraldehyde-3-phosphate dehyd       | 17 |
| 4.475707189 | 4.709979 | E9AVH4     | tr E9AVH4 E9AVH4_LEIMU | 40S ribosomal protein S6 OS=Leish      | 14 |
| 4.653104719 | 4.708751 | E9AQL3     | tr E9AQL3 E9AQL3_LEIMU | Putative orotidine-5-phosphate dec     | 3  |
| 4.995987345 | 4.708531 | E9AYV9     | tr E9AYV9 E9AYV9_LEIMU | Uncharacterized protein OS=Leishr      | 2  |
| 4.19844227  | 4.707336 | E9B384     | tr E9B384 E9B384_LEIMU | Uncharacterized protein OS=Leishm      | 11 |
| 4.186671723 | 4.706168 | E9ASC5     | tr E9ASC5 E9ASC5_LEIMU | Stress-inducible protein STI1 homol    | 6  |
| 4.767854983 | 4.705355 | E9B0P0     | tr E9B0P0 E9B0P0_LEIMU | Putative RNA-binding protein OS=Le     | 7  |
| 4.134399725 | 4.70444  | Q5MY89;E9  | tr Q5MY89 Q5MY89_LEIAM | Replication protein A subunit OS=      | 9  |
| 4.308213219 | 4.702472 | E9ANM6     | tr E9ANM6 E9ANM6_LEIMU | Uncharacterized protein OS=Leish       | 9  |
| 4.0492794   | 4.701459 | E9AZ73     | tr E9AZ73 E9AZ73_LEIMU | Putative eukaryotic translation relea  | 9  |
| 4.274742506 | 4.699359 | E9AN57;E9  | tr E9AN57 E9AN57_LEIMU | GP63, leishmanolysin OS=Leishman       | 5  |
| 4.241523675 | 4.697689 | E9AK49;E9  | tr E9AK49 E9AK49_LEIMU | Uncharacterized protein OS=Leishm      | 2  |
| 4.778622729 | 4.695471 | E9B007     | tr E9B007 E9B007_LEIMU | Uncharacterized protein OS=Leishm      | 6  |
| 4.373305388 | 4.694984 | E9B376;A0  | tr E9B376 E9B376_LEIMU | Nucleoside diphosphate kinase OS=l     | 9  |
| 4.277804521 | 4.694686 | E9B2K8     | tr E9B2K8 E9B2K8_LEIMU | Uncharacterized protein OS=Leishm      | 10 |
| 3.824507085 | 4.694287 | E9AR65     | tr E9AR65 E9AR65_LEIMU | Putative ATP-dependent RNA helica      | 2  |
| 4.863135481 | 4.690069 | E9AT16;E9  | tr E9AT16 E9AT16_LEIMU | Methyltransferase OS=Leishmania n      | 5  |
| 4.895252159 | 4.68851  | E9ALE1     | tr E9ALE1 E9ALE1_LEIMU | Uncharacterized protein OS=Leishm;     | 4  |
| 4.131378536 | 4.687196 | E9B686     | tr E9B686 E9B686_LEIMU | Putative calcium motive P-type ATP;    | 6  |
| 3.668242595 | 4.686811 | E9B4N7     | tr E9B4N7 E9B4N7_LEIMU | Uncharacterized protein OS=Leishr      | 4  |
| 4.308695384 | 4.686609 | E9AQ01     | tr E9AQ01 E9AQ01_LEIMU | Uncharacterized protein OS=Leishn      | 2  |
| 4.475384478 | 4.684926 | E9ATX0     | tr E9ATX0 E9ATX0_LEIMU | 2-methoxy-6-polyprenyl-1,4-benzoc      | 2  |
| 3.695544242 | 4.684751 | E9AW96     | tr E9AW96 E9AW96_LEIMU | Actin interacting protein-like prot    | 2  |
| 4.76419821  | 4.684366 | E9B5X5     | tr E9B5X5 E9B5X5_LEIMU | Uncharacterized protein OS=Leishm      | 4  |
| 5.090347859 | 4.684258 | E9ASG7     | tr E9ASG7 E9ASG7_LEIMU | Putative DNAJ domain protein OS=l      | 3  |
| 5.082354563 | 4.679578 | E9B733     | tr E9B733 E9B733_LEIMU | Uncharacterized protein OS=Leishm      | 2  |
| 4.167474861 | 4.678015 | E9AWR7     | tr E9AWR7 E9AWR7_LEIMU | Malic enzyme OS=Leishmania me;         | 9  |
| 4.422039682 | 4.677468 | E9B3G5     | tr E9B3G5 E9B3G5_LEIMU | Putative myosin heavy chain OS=Le      | 4  |
| 4.758030765 | 4.674883 | E9ATD2;E9  | tr E9ATD2 E9ATD2_LEIMU | Putative polyubiquitin (Fragment) C    | 6  |
| 5.009621339 | 4.673807 | E9AVB3     | tr E9AVB3 E9AVB3_LEIMU | Putative vesicle-associated memb       | 3  |
| 4.41701483  | 4.669634 | E9AXD1     | tr E9AXD1 E9AXD1_LEIMU | Uncharacterized protein OS=Leishn      | 9  |
| 4.530186592 | 4.668844 | E9B0I8     | tr E9B0I8 E9B0I8_LEIMU | Putative histidyl-tRNA synthetase OS-  | 5  |
| 4.173037155 | 4.667344 | E9B4K3     | tr E9B4K3 E9B4K3_LEIMU | Eukaryotic translation initiation fact | 14 |
| 4.379299552 | 4.666704 | E9APV6     | tr E9APV6 E9APV6_LEIMU | Putative kinesin K39 OS=Leishmani;     | 4  |
| 4.113477618 | 4.665544 | E9AJZ0     | tr E9AJZ0 E9AJZ0_LEIMU | DNA topoisomerase type IB small suk    | 11 |
| 4.830315828 | 4.662228 | E9AR51     | tr E9AR51 E9AR51_LEIMU | Ysine decarboxylase-like protein OS    | 5  |
| 4.378623841 | 4.655605 | E9B1B3     | tr E9B1B3 E9B1B3_LEIMU | Phosphoglycerate kinase OS=Leishr      | 2  |
| 4.388779262 | 4.654675 | E9ALD8;E9  | tr E9ALD8 E9ALD8_LEIMU | 40S ribosomal protein S19-like prot    | 7  |
| 4.386970168 | 4.652517 | E9B4A1     | tr E9B4A1 E9B4A1_LEIMU | Mitochondrial processing peptidase     | 2  |
| 4.18977966  | 4.651601 | E9ALK4     | tr E9ALK4 E9ALK4_LEIMU | Uncharacterized protein OS=Leishm      | 8  |
| 4.172099425 | 4.647217 | E9ATC6     | tr E9ATC6 E9ATC6_LEIMU | 2-oxoglutarate dehydrogenase E1 c      | 8  |
| 4.182302173 | 4.645184 | E9B1F7     | tr E9B1F7 E9B1F7_LEIMU | Uncharacterized protein OS=Leishm;     | 2  |
| 5.287144113 | 4.644109 | E9AKW6     | tr E9AKW6 E9AKW6_LEIMU | Putative acyl-coenzyme a dehydr        | 3  |
| 4.370785281 | 4.643485 | E9AT02;A0  | tr E9AT02 E9AT02_LEIMU | Developmentally regulated GTP-bin      | 6  |
| 4.090157167 | 4.642432 | E9AZ71     | tr E9AZ71 E9AZ71_LEIMU | Uncharacterized protein OS=Leishm      | 5  |
| 4.230054302 | 4.642331 | E9ALM8     | tr E9ALM8 E9ALM8_LEIMU | Putative fumarate hydratase (Frag      | 2  |
| 4.239918453 | 4.642256 | E9AZE0     | tr E9AZE0 E9AZE0_LEIMU | Obg-like ATPase 1 OS=Leishmania m      | 4  |
| 3.827937239 | 4.641953 | E9AZV4     | tr E9AZV4 E9AZV4_LEIMU | Haloacid dehalogenase-like hydrola     | 2  |
| 4.316564547 | 4.641394 | Q86PL4;E9  | tr Q86PL4 Q86PL4_LEIME | Paraflagellar rod protein 1D OS=Leis   | 22 |

|             |          |            |                                                                |    |
|-------------|----------|------------|----------------------------------------------------------------|----|
| 3.847213884 | 4.639051 | E9AQ51     | tr E9AQ51 E9AQ51_LEIMU Uncharacterized protein OS=Leishn       | 3  |
| 4.781985743 | 4.638579 | E9AKP2     | tr E9AKP2 E9AKP2_LEIMU Proteasome subunit beta OS=Leishr       | 2  |
| 5.444502683 | 4.634933 | E9B0P1     | tr E9B0P1 E9B0P1_LEIMU Importin subunit alpha OS=Leishma       | 3  |
| 4.606347611 | 4.633944 | E9B617     | tr E9B617 E9B617_LEIMU Mitochondrial processing peptidase      | 12 |
| 3.463468788 | 4.633626 | E9B496     | tr E9B496 E9B496_LEIMU Putative aminopeptidase OS=Leishr       | 3  |
| 4.098074126 | 4.631641 | E9APL2     | tr E9APL2 E9APL2_LEIMU Uncharacterized protein OS=Leishm       | 6  |
| 4.40697876  | 4.630817 | E9API9     | tr E9API9 E9API9_LEIMU Putative dynein heavy chain OS=Leisl    | 18 |
| 4.044959927 | 4.629406 | E9B3K6     | tr E9B3K6 E9B3K6_LEIMU Uncharacterized protein OS=Leishm       | 2  |
| 4.352045518 | 4.626033 | E9B2V1     | tr E9B2V1 E9B2V1_LEIMU Uncharacterized protein OS=Leishm       | 7  |
| 4.552039988 | 4.62569  | E9B528     | tr E9B528 E9B528_LEIMU Glycosyltransferase-like protein OS=    | 2  |
| 5.016306329 | 4.622611 | E9AP67     | tr E9AP67 E9AP67_LEIMU Putative flagellar radial spoke prote   | 2  |
| 4.574620285 | 4.622574 | E9AKB4     | tr E9AKB4 E9AKB4_LEIMU Serine/threonine-protein phosphat       | 4  |
| 5.019657317 | 4.622531 | E9AWL9     | tr E9AWL9 E9AWL9_LEIMU Uncharacterized protein OS=Leishi       | 2  |
| 4.531673384 | 4.622035 | E9AJY2;A0A | tr E9AJY2 E9AJY2_LEIMU Elongation initiation factor 2 alpha st | 14 |
| 4.457453919 | 4.621164 | E9ARK4     | tr E9ARK4 E9ARK4_LEIMU Uncharacterized protein OS=Leishr       | 4  |
| 4.090127315 | 4.618827 | E9B3Z8     | tr E9B3Z8 E9B3Z8_LEIMU Putative peptidase M20/M25/M40 (        | 7  |
| 4.701009415 | 4.617833 | E9AZQ3     | tr E9AZQ3 E9AZQ3_LEIMU Uncharacterized protein OS=Leishn       | 2  |
| 3.482446215 | 4.61736  | E9ALC3     | tr E9ALC3 E9ALC3_LEIMU Cation-transporting ATPase OS=Leis      | 4  |
| 5.290253359 | 4.617279 | E9AL69     | tr E9AL69 E9AL69_LEIMU Uncharacterized protein OS=Leishm       | 3  |
| 4.258702664 | 4.616615 | E9AVY6     | tr E9AVY6 E9AVY6_LEIMU Alanine--tRNA ligase OS=Leishmani       | 17 |
| 4.452341703 | 4.615842 | E9B099;Q07 | tr E9B099 E9B099_LEIMU Putative heat-shock protein hsp70 C     | 46 |
| 4.453979527 | 4.615142 | E9B2V7     | tr E9B2V7 E9B2V7_LEIMU Uncharacterized protein OS=Leishm       | 3  |
| 4.47231514  | 4.615122 | E9ANZ4     | tr E9ANZ4 E9ANZ4_LEIMU Cytochrome c oxidase subunit IV O       | 11 |
| 4.642062489 | 4.615051 | E9AZA6     | tr E9AZA6 E9AZA6_LEIMU D-lactate dehydrogenase-like prote      | 2  |
| 4.131261831 | 4.614142 | E9ASL8;E9A | tr E9ASL8 E9ASL8_LEIMU Putative 40S ribosomal protein S10 C    | 7  |
| 4.970636567 | 4.613015 | E9AMV4     | tr E9AMV4 E9AMV4_LEIMU Uncharacterized protein OS=Leish        | 2  |
| 4.395036051 | 4.612586 | E9ATF3     | tr E9ATF3 E9ATF3_LEIMU Uncharacterized protein OS=Leishm       | 2  |
| 3.892430128 | 4.612327 | E9B1R0     | tr E9B1R0 E9B1R0_LEIMU Putative N-acyl-L-amino acid amidol     | 3  |
| 5.271827108 | 4.612264 | E9AST1     | tr E9AST1 E9AST1_LEIMU Proteasome subunit alpha type OS=       | 6  |
| 3.841407452 | 4.609692 | E9AS04     | tr E9AS04 E9AS04_LEIMU Uncharacterized protein OS=Leishm       | 3  |
| 4.109706831 | 4.60931  | E9AW71     | tr E9AW71 E9AW71_LEIMU Kinesin-like protein OS=Leishmani       | 11 |
| 4.359268533 | 4.608993 | E9AS67     | tr E9AS67 E9AS67_LEIMU Uncharacterized protein OS=Leishm       | 11 |
| 4.628913559 | 4.605492 | E9B1D9     | tr E9B1D9 E9B1D9_LEIMU Ribosomal protein L15 OS=Leishma        | 2  |
| 4.470368179 | 4.605452 | E9AZ83;E9A | tr E9AZ83 E9AZ83_LEIMU Glycosomal phosphoenolpyruvate c        | 15 |
| 4.378582912 | 4.602144 | E9AW04;Q4  | tr E9AW04 E9AW04_LEIMU Peroxidoxin (Tryparedoxin peroxic       | 5  |
| 4.324335318 | 4.600704 | V5RIA5;E9A | tr V5RIA5 V5RIA5_LEIAM Calmodulin-like protein OS=Leishma      | 8  |
| 4.023490083 | 4.598209 | E9B3P7     | tr E9B3P7 E9B3P7_LEIMU Uncharacterized protein OS=Leishm       | 4  |
| 3.972575032 | 4.596599 | P36400;Q05 | sp P36400 LMCPB_LEIME Cysteine proteinase B OS=Leishmani       | 3  |
| 4.571287216 | 4.592189 | E9AN60     | tr E9AN60 E9AN60_LEIMU Uncharacterized protein OS=Leishn       | 10 |
| 4.673679082 | 4.590341 | E9AKK2     | tr E9AKK2 E9AKK2_LEIMU Dipeptidyl peptidase 3 OS=Leishma       | 13 |
| 4.298772399 | 4.589561 | E9AML1     | tr E9AML1 E9AML1_LEIMU Uncharacterized protein OS=Leishr       | 10 |
| 4.310421868 | 4.589346 | E9B226     | tr E9B226 E9B226_LEIMU Putative 3,2-trans-enoyl-CoA isomer     | 7  |
| 4.534353081 | 4.583811 | E9ATH3     | tr E9ATH3 E9ATH3_LEIMU Adenosylhomocysteinase OS=Leish         | 23 |
| 4.228264941 | 4.581954 | E9B6I9     | tr E9B6I9 E9B6I9_LEIMU Putative ATP-dependent RNA helicase     | 27 |
| 4.265343592 | 4.581874 | E9AQH3     | tr E9AQH3 E9AQH3_LEIMU Putative 50S ribosomal protein L17      | 2  |
| 4.0503584   | 4.580009 | E9AJD6     | tr E9AJD6 E9AJD6_LEIMU Putative long-chain-fatty-acid-CoA li   | 4  |
| 4.775038194 | 4.579861 | E9AMD0     | tr E9AMD0 E9AMD0_LEIMU Putative ribose-phosphate pyroph        | 2  |
| 4.48312826  | 4.579268 | E9AL72     | tr E9AL72 E9AL72_LEIMU Putative electron transfer flavoprote   | 3  |
| 4.214225965 | 4.578158 | E9AUA3     | tr E9AUA3 E9AUA3_LEIMU Uncharacterized protein OS=Leishr       | 3  |
| 4.154820142 | 4.576345 | E9ATU4     | tr E9ATU4 E9ATU4_LEIMU Uncharacterized protein OS=Leishr       | 31 |
| 5.044471868 | 4.574388 | E9ANP7     | tr E9ANP7 E9ANP7_LEIMU Uncharacterized protein OS=Leishn       | 9  |
| 4.333426305 | 4.571874 | E9AT99     | tr E9AT99 E9AT99_LEIMU 14-3-3 protein-like protein OS=Leish    | 7  |

|             |          |            |                        |                                       |    |
|-------------|----------|------------|------------------------|---------------------------------------|----|
| 4.406229742 | 4.571036 | E9AST7     | tr E9AST7 E9AST7_LEIMU | Proteasome subunit beta OS=Leishm     | 2  |
| 4.511206903 | 4.570394 | E9AL39     | tr E9AL39 E9AL39_LEIMU | Uncharacterized protein OS=Leishm     | 3  |
| 4.776030541 | 4.569565 | E9AQA6;Q4  | tr E9AQA6 E9AQA6_LEIMU | Tryparedoxin peroxidase OS=Leish      | 3  |
| 4.199134314 | 4.56807  | E9AY65     | tr E9AY65 E9AY65_LEIMU | Uncharacterized protein OS=Leishm     | 2  |
| 4.373039279 | 4.567862 | Q9NGK2;E9  | tr Q9NGK2 Q9NGK2_LEIAM | 40S ribosomal protein S24 OS=Lei      | 7  |
| 4.895654366 | 4.56665  | E9AY45;A7Y | tr E9AY45 E9AY45_LEIMU | Uncharacterized protein OS=Leishm     | 7  |
| 4.769681683 | 4.566345 | E9AXP2     | tr E9AXP2 E9AXP2_LEIMU | Uncharacterized protein OS=Leishm     | 5  |
| 4.467012945 | 4.56483  | E9AJG4     | tr E9AJG4 E9AJG4_LEIMU | Uncharacterized protein OS=Leishm     | 24 |
| 4.352971835 | 4.564827 | E9B3A4     | tr E9B3A4 E9B3A4_LEIMU | Uncharacterized protein OS=Leishm     | 3  |
| 4.443717841 | 4.564226 | E9B0G6     | tr E9B0G6 E9B0G6_LEIMU | WD-40 repeat protein OS=Leishmar      | 2  |
| 4.865994454 | 4.563367 | E9AL58     | tr E9AL58 E9AL58_LEIMU | Uncharacterized protein OS=Leishm     | 3  |
| 4.938435709 | 4.56335  | E9APY0     | tr E9APY0 E9APY0_LEIMU | Serine hydroxymethyltransferase O     | 3  |
| 4.743693284 | 4.559905 | E9B6Q4     | tr E9B6Q4 E9B6Q4_LEIMU | Putative 60S ribosomal protein L27    | 6  |
| 4.150940071 | 4.556869 | E9AV43     | tr E9AV43 E9AV43_LEIMU | Uncharacterized protein OS=Leishr     | 3  |
| 3.83648692  | 4.55521  | E9AZX3     | tr E9AZX3 E9AZX3_LEIMU | Putative DEAD box RNA helicase OS     | 4  |
| 5.067965189 | 4.552566 | E9B6J9     | tr E9B6J9 E9B6J9_LEIMU | Uncharacterized protein OS=Leishma    | 2  |
| 4.398117041 | 4.550439 | E9B6D4     | tr E9B6D4 E9B6D4_LEIMU | Putative RNA binding protein OS=Le    | 2  |
| 3.966760099 | 4.550187 | E9B2R2     | tr E9B2R2 E9B2R2_LEIMU | Uncharacterized protein OS=Leishm     | 5  |
| 4.572267555 | 4.543656 | E9B3L2;P27 | tr E9B3L2 E9B3L2_LEIMU | Heat shock protein 83-1 OS=Leishma    | 50 |
| 4.155912501 | 4.543582 | E9ANN2     | tr E9ANN2 E9ANN2_LEIMU | Uncharacterized protein OS=Leishi     | 2  |
| 4.322635603 | 4.536472 | E9AQ29     | tr E9AQ29 E9AQ29_LEIMU | Ribonucleoprotein p18, mitochond      | 10 |
| 4.789584736 | 4.536442 | E9AXU7;E9A | tr E9AXU7 E9AXU7_LEIMU | Succinate--CoA ligase [ADP-forming    | 9  |
| 4.506232142 | 4.534663 | E9ASD6     | tr E9ASD6 E9ASD6_LEIMU | Elongation factor 2 OS=Leishmania     | 50 |
| 4.430104568 | 4.53367  | E9AQP7;E8f | tr E9AQP7 E9AQP7_LEIMU | Uncharacterized protein OS=Leishr     | 5  |
| 4.646500511 | 4.532225 | E9B2L9     | tr E9B2L9 E9B2L9_LEIMU | Uncharacterized protein OS=Leishm     | 13 |
| 4.604435802 | 4.531846 | E9AYZ0     | tr E9AYZ0 E9AYZ0_LEIMU | Putative 2-oxoglutarate dehydrogen    | 11 |
| 4.120642992 | 4.53111  | E9AVJ6     | tr E9AVJ6 E9AVJ6_LEIMU | Putative GMP synthase (Putative glu   | 7  |
| 4.760262085 | 4.531003 | E9ANW2     | tr E9ANW2 E9ANW2_LEIMU | Uncharacterized protein OS=Leisl      | 4  |
| 4.634180289 | 4.530163 | E9AZS3     | tr E9AZS3 E9AZS3_LEIMU | Uncharacterized protein OS=Leishm     | 10 |
| 4.321326273 | 4.529904 | E9AX72     | tr E9AX72 E9AX72_LEIMU | Putative notchless homolog OS=Leis    | 2  |
| 4.627986217 | 4.529893 | E9B2G8     | tr E9B2G8 E9B2G8_LEIMU | Uncharacterized protein OS=Leishr     | 3  |
| 4.679311589 | 4.528704 | E9ATI7     | tr E9ATI7 E9ATI7_LEIMU | Uncharacterized protein OS=Leishma    | 3  |
| 4.274778363 | 4.528516 | E9B028     | tr E9B028 E9B028_LEIMU | Putative mitochondrial DEAD box pr    | 4  |
| 3.916794663 | 4.52803  | E9AL57     | tr E9AL57 E9AL57_LEIMU | Acyl-CoA dehydrogenase, mitochonc     | 4  |
| 4.300439674 | 4.528011 | E9B183     | tr E9B183 E9B183_LEIMU | Uncharacterized protein OS=Leishm     | 12 |
| 4.483876353 | 4.527052 | E9B713     | tr E9B713 E9B713_LEIMU | Proteasome subunit alpha type OS=     | 7  |
| 4.48805083  | 4.526699 | E9AQC3     | tr E9AQC3 E9AQC3_LEIMU | Putative cation transporter OS=Lei    | 3  |
| 5.09763158  | 4.524947 | E9AZE8     | tr E9AZE8 E9AZE8_LEIMU | Putative TPR-repeat protein OS=Leis   | 3  |
| 4.326845868 | 4.523338 | E9AUC7     | tr E9AUC7 E9AUC7_LEIMU | Putative T-complex protein 1, thet    | 18 |
| 4.30235345  | 4.521626 | E9ARX7     | tr E9ARX7 E9ARX7_LEIMU | Kinesin-like protein OS=Leishmania    | 4  |
| 4.569753831 | 4.520978 | E9AJJ4     | tr E9AJJ4 E9AJJ4_LEIMU | Uncharacterized protein OS=Leishmar   | 7  |
| 4.252855992 | 4.517017 | E9AU76     | tr E9AU76 E9AU76_LEIMU | Putative 40S ribosomal protein S8 (   | 3  |
| 4.362345566 | 4.51598  | E9AQV4     | tr E9AQV4 E9AQV4_LEIMU | Uncharacterized protein OS=Leishr     | 10 |
| 4.564144795 | 4.513886 | E9B307     | tr E9B307 E9B307_LEIMU | Uncharacterized protein OS=Leishm     | 4  |
| 3.741299096 | 4.513215 | E9APT0     | tr E9APT0 E9APT0_LEIMU | Putative calpain-like cysteine peptid | 3  |
| 4.383589703 | 4.512806 | E9AUV6;E9A | tr E9AUV6 E9AUV6_LEIMU | Putative aminoacylase OS=Leishma      | 4  |
| 4.28505352  | 4.51221  | E9AU41     | tr E9AU41 E9AU41_LEIMU | Uncharacterized protein OS=Leishn     | 12 |
| 3.993942242 | 4.510833 | E9AQK9     | tr E9AQK9 E9AQK9_LEIMU | Uncharacterized protein OS=Leishn     | 2  |
| 4.412774359 | 4.510586 | E9AUQ0     | tr E9AUQ0 E9AUQ0_LEIMU | Uncharacterized protein OS=Leishi     | 8  |
| 4.577137029 | 4.51048  | E9ALZ2     | tr E9ALZ2 E9ALZ2_LEIMU | High mobility group protein homolog   | 14 |
| 4.787542083 | 4.510458 | E9AXR4     | tr E9AXR4 E9AXR4_LEIMU | Uncharacterized protein OS=Leishr     | 8  |
| 4.355122782 | 4.510387 | E9AV52     | tr E9AV52 E9AV52_LEIMU | Uncharacterized protein OS=Leishr     | 9  |

|             |          |            |                        |                                      |    |
|-------------|----------|------------|------------------------|--------------------------------------|----|
| 4.388313453 | 4.509586 | E9AK60;E9A | tr E9AK60 E9AK60_LEIMU | Uncharacterized protein OS=Leishm    | 4  |
| 4.142871198 | 4.508958 | E9ASU7     | tr E9ASU7 E9ASU7_LEIMU | Uncharacterized protein OS=Leishr    | 2  |
| 3.761378081 | 4.507796 | E9B1K6     | tr E9B1K6 E9B1K6_LEIMU | Mevalonate kinase OS=Leishmania r    | 3  |
| 4.565850364 | 4.507367 | E9B2E2     | tr E9B2E2 E9B2E2_LEIMU | Uncharacterized protein OS=Leishm    | 19 |
| 4.332435544 | 4.503531 | E9B3B4     | tr E9B3B4 E9B3B4_LEIMU | Dihydrolipoyl dehydrogenase OS=Le    | 18 |
| 3.965301979 | 4.503512 | E9B549     | tr E9B549 E9B549_LEIMU | Uncharacterized protein OS=Leishm    | 12 |
| 4.515036841 | 4.503093 | E9AW01     | tr E9AW01 E9AW01_LEIMU | Uncharacterized protein OS=Leish     | 3  |
| 5.063996469 | 4.500839 | E9AXM1     | tr E9AXM1 E9AXM1_LEIMU | GTP-binding nuclear protein OS=L     | 10 |
| 4.347831871 | 4.500175 | E9B5M6     | tr E9B5M6 E9B5M6_LEIMU | Coatomer subunit alpha OS=Leishr     | 6  |
| 4.338029168 | 4.498854 | E9APZ2     | tr E9APZ2 E9APZ2_LEIMU | Uncharacterized protein OS=Leishm    | 30 |
| 4.38229603  | 4.497511 | E9ALJ9     | tr E9ALJ9 E9ALJ9_LEIMU | Aminopeptidase OS=Leishmania mex     | 2  |
| 3.857564154 | 4.497166 | E9B2F2     | tr E9B2F2 E9B2F2_LEIMU | Uncharacterized protein OS=Leishm:   | 3  |
| 4.787096547 | 4.493857 | E9B2E6     | tr E9B2E6 E9B2E6_LEIMU | Uncharacterized protein OS=Leishm    | 2  |
| 4.307947472 | 4.493536 | E9B5E9     | tr E9B5E9 E9B5E9_LEIMU | Adenosine kinase-like protein OS=Le  | 2  |
| 4.678297868 | 4.492359 | E9B215     | tr E9B215 E9B215_LEIMU | Prostaglandin f2-alpha synthase OS=  | 3  |
| 4.581751745 | 4.492131 | E9ASS0     | tr E9ASS0 E9ASS0_LEIMU | Uncharacterized protein OS=Leishm:   | 2  |
| 4.8708618   | 4.491774 | E9AZU1     | tr E9AZU1 E9AZU1_LEIMU | Uncharacterized protein OS=Leishr    | 11 |
| 4.944646776 | 4.489501 | E9AYY9     | tr E9AYY9 E9AYY9_LEIMU | Uncharacterized protein OS=Leishm    | 7  |
| 4.13486041  | 4.489487 | E9AZM2     | tr E9AZM2 E9AZM2_LEIMU | Putative dynein heavy chain OS=Lc    | 3  |
| 4.616591595 | 4.487623 | E9AM16     | tr E9AM16 E9AM16_LEIMU | Putative ABC transporter OS=Leish    | 10 |
| 3.657166352 | 4.486621 | E9B162     | tr E9B162 E9B162_LEIMU | Uncharacterized protein OS=Leishm    | 2  |
| 4.682221003 | 4.485247 | E9AWU0     | tr E9AWU0 E9AWU0_LEIMU | Putative replication factor C, subu  | 9  |
| 4.455085822 | 4.484336 | E9ATD8     | tr E9ATD8 E9ATD8_LEIMU | Putative cysteine synthase OS=Leisl  | 11 |
| 4.392620836 | 4.479818 | E9AVS9     | tr E9AVS9 E9AVS9_LEIMU | Uncharacterized protein OS=Leishm    | 2  |
| 4.445492184 | 4.479291 | E8NHG6;E8  | tr E8NHG6 E8NHG6_LEIMU | Uncharacterized protein LmxM_3C      | 22 |
| 4.730807728 | 4.479164 | E9B0M2     | tr E9B0M2 E9B0M2_LEIMU | Uncharacterized protein OS=Leish     | 2  |
| 4.488317531 | 4.478458 | E9AVP4     | tr E9AVP4 E9AVP4_LEIMU | Putative proteasome regulatory ATl   | 7  |
| 3.981629281 | 4.477621 | E9AM68     | tr E9AM68 E9AM68_LEIMU | Uncharacterized protein OS=Leish     | 5  |
| 4.607612649 | 4.475669 | E9B4Z0;P90 | tr E9B4Z0 E9B4Z0_LEIMU | ATP-dependent RNA helicase OS=Le     | 4  |
| 4.267275889 | 4.475094 | E9AYH5     | tr E9AYH5 E9AYH5_LEIMU | Putative mitotubule-associated pro   | 3  |
| 4.45583343  | 4.47241  | E9AXJ6;E9A | tr E9AXJ6 E9AXJ6_LEIMU | ATP synthase subunit beta OS=Leishr  | 25 |
| 4.754131178 | 4.46966  | E9B343     | tr E9B343 E9B343_LEIMU | Putative cystathionine beta-lyase O  | 4  |
| 4.366792198 | 4.468731 | E9AV58     | tr E9AV58 E9AV58_LEIMU | Hypoxanthine phosphoribosyltransf    | 2  |
| 4.308329543 | 4.467188 | E9AKB8     | tr E9AKB8 E9AKB8_LEIMU | Putative nucleolar RNA helicase II O | 7  |
| 4.270628949 | 4.463538 | E9B6Z8     | tr E9B6Z8 E9B6Z8_LEIMU | Uncharacterized protein OS=Leishm    | 2  |
| 4.372022031 | 4.461118 | E9AX96     | tr E9AX96 E9AX96_LEIMU | Uncharacterized protein OS=Leishm    | 3  |
| 4.432936976 | 4.460939 | E9ANC1     | tr E9ANC1 E9ANC1_LEIMU | Uncharacterized protein OS=Leishn    | 7  |
| 4.482964121 | 4.459012 | E9AK97     | tr E9AK97 E9AK97_LEIMU | Putative fructose-1,6-bisphosphatas  | 4  |
| 4.503298373 | 4.452558 | E9AWE0     | tr E9AWE0 E9AWE0_LEIMU | T-complex protein 1 subunit gamr     | 18 |
| 4.298516483 | 4.451755 | E9APH0     | tr E9APH0 E9APH0_LEIMU | Programmed cell death 6 protein-li   | 2  |
| 4.31811569  | 4.45104  | E9AJY9     | tr E9AJY9 E9AJY9_LEIMU | Uncharacterized protein OS=Leishma   | 7  |
| 4.182939566 | 4.450441 | Q9BLW4;E9  | tr Q9BLW4 Q9BLW4_LEIME | GDP-mannose pyrophosphorylase        | 3  |
| 4.720223382 | 4.450234 | E9AU22     | tr E9AU22 E9AU22_LEIMU | Uncharacterized protein OS=Leishn    | 4  |
| 4.534735569 | 4.44954  | E9AM10     | tr E9AM10 E9AM10_LEIMU | Putative RNA-binding protein OS=     | 6  |
| 4.841322177 | 4.447065 | E9ATE6     | tr E9ATE6 E9ATE6_LEIMU | Uncharacterized protein OS=Leishm    | 6  |
| 4.450553445 | 4.446656 | E9AST4     | tr E9AST4 E9AST4_LEIMU | Clathrin heavy chain OS=Leishmania   | 22 |
| 3.978076459 | 4.446415 | E9AYU4     | tr E9AYU4 E9AYU4_LEIMU | Ribokinase OS=Leishmania mexican     | 5  |
| 5.927804415 | 4.446279 | E9ARJ9;E9A | tr E9ARJ9 E9ARJ9_LEIMU | Putative ATP-dependent zinc metallc  | 2  |
| 4.680738542 | 4.44444  | E9ATM0     | tr E9ATM0 E9ATM0_LEIMU | Proteasome regulatory ATPase sul     | 6  |
| 4.628928765 | 4.442332 | E9B189     | tr E9B189 E9B189_LEIMU | Uncharacterized protein OS=Leishm    | 3  |
| 4.380819534 | 4.441414 | E9AR50     | tr E9AR50 E9AR50_LEIMU | GMP reductase OS=Leishmania mex      | 6  |
| 4.433993678 | 4.439243 | E9AZA2     | tr E9AZA2 E9AZA2_LEIMU | Putative rRNA methyltransferase O    | 7  |



|             |          |            |                        |                                       |    |
|-------------|----------|------------|------------------------|---------------------------------------|----|
| 4.573300109 | 4.438265 | E9B191     | tr E9B191 E9B191_LEIMU | Uncharacterized protein OS=Leishm     | 3  |
| 4.155536887 | 4.436174 | E9AR29     | tr E9AR29 E9AR29_LEIMU | Putative P-type ATPase OS=Leishma     | 3  |
| 3.714803495 | 4.435421 | E9AMW9     | tr E9AMW9 E9AMW9_LEIMU | Uncharacterized protein OS=Leis       | 3  |
| 4.498254275 | 4.433536 | E9APE7;E9A | tr E9APE7 E9APE7_LEIMU | 40S ribosomal protein S4 OS=Leishn    | 20 |
| 4.377871967 | 4.432763 | E9AK64     | tr E9AK64 E9AK64_LEIMU | Pescadillo homolog OS=Leishmania      | 6  |
| 4.955571494 | 4.429458 | E9AW66     | tr E9AW66 E9AW66_LEIMU | Uncharacterized protein OS=Leish      | 2  |
| 4.520879363 | 4.429301 | Q9GRU2;E9  | tr Q9GRU2 Q9GRU2_LEIME | Mitogen-activated protein kinase      | 2  |
| 4.514404255 | 4.429047 | E9AV93     | tr E9AV93 E9AV93_LEIMU | T-complex protein 1 subunit delta C   | 15 |
| 4.563708181 | 4.427856 | E9AUS9     | tr E9AUS9 E9AUS9_LEIMU | Putative axoneme central apparatus    | 2  |
| 4.421099371 | 4.427815 | E9ARY6     | tr E9ARY6 E9ARY6_LEIMU | Uncharacterized protein OS=Leishm     | 2  |
| 4.689431517 | 4.427182 | E9ANK8;E9A | tr E9ANK8 E9ANK8_LEIMU | Putative aminopeptidase (Metallo-     | 5  |
| 4.528836032 | 4.426241 | E9AYH6     | tr E9AYH6 E9AYH6_LEIMU | Uncharacterized protein OS=Leishr     | 22 |
| 4.635307465 | 4.42449  | E9AT24     | tr E9AT24 E9AT24_LEIMU | Putative acid phosphatase OS=Leish    | 4  |
| 4.254599811 | 4.422241 | E9AT49     | tr E9AT49 E9AT49_LEIMU | Putative mitochondrial ATP-depend     | 3  |
| 4.490653212 | 4.421295 | E9ARK6;E9A | tr E9ARK6 E9ARK6_LEIMU | Citrate synthase OS=Leishmania me     | 8  |
| 4.641568724 | 4.419774 | E9AJI7     | tr E9AJI7 E9AJI7_LEIMU | Uncharacterized protein OS=Leishmar   | 2  |
| 4.30385079  | 4.418518 | E9AVW9     | tr E9AVW9 E9AVW9_LEIMU | Intraflagellar transport protein-lik  | 2  |
| 4.322960456 | 4.417589 | E9AJY1     | tr E9AJY1 E9AJY1_LEIMU | Uncharacterized protein OS=Leishma    | 3  |
| 5.29494103  | 4.417089 | E9AQU6     | tr E9AQU6 E9AQU6_LEIMU | DNA-directed rna polymerase I lar     | 7  |
| 4.476706692 | 4.416758 | E9AUG6     | tr E9AUG6 E9AUG6_LEIMU | Midasin OS=Leishmania mexicana        | 50 |
| 4.125678788 | 4.415422 | E9AP30     | tr E9AP30 E9AP30_LEIMU | Uncharacterized protein OS=Leishm     | 2  |
| 4.479545184 | 4.415207 | E8NHJ8;E8N | tr E8NHJ8 E8NHJ8_LEIMU | 60S acidic ribosomal protein P0 OS=   | 12 |
| 4.329016325 | 4.414466 | E9B063     | tr E9B063 E9B063_LEIMU | Dihydrolipoamide acetyltransferase    | 8  |
| 4.43348004  | 4.413774 | E9B3E6     | tr E9B3E6 E9B3E6_LEIMU | 3-hydroxyisobutyryl-CoA hydrolase,    | 2  |
| 5.321301974 | 4.410081 | E9AWI3     | tr E9AWI3 E9AWI3_LEIMU | V-type proton ATPase subunit a OS     | 5  |
| 4.437039655 | 4.409282 | E9APC4     | tr E9APC4 E9APC4_LEIMU | Uncharacterized protein OS=Leishm     | 2  |
| 4.908251754 | 4.409128 | E9B0H0     | tr E9B0H0 E9B0H0_LEIMU | Eukaryotic translation initiation fac | 3  |
| 4.386186739 | 4.408287 | Q867J9;E9A | tr Q867J9 Q867J9_LEIME | Histone H2A OS=Leishmania mexicar     | 3  |
| 4.329887203 | 4.408197 | E9AXQ9     | tr E9AXQ9 E9AXQ9_LEIMU | Putative 3-oxo-5-alpha-steroid 4-de   | 6  |
| 4.395339362 | 4.406196 | E9AX71     | tr E9AX71 E9AX71_LEIMU | Putative fatty-acid desaturase OS=L   | 5  |
| 3.954451377 | 4.405593 | E9B3T7     | tr E9B3T7 E9B3T7_LEIMU | Uncharacterized protein OS=Leishm     | 3  |
| 4.573339046 | 4.405397 | E9B4N8     | tr E9B4N8 E9B4N8_LEIMU | Uncharacterized protein OS=Leishr     | 8  |
| 4.445576161 | 4.399104 | E9AP80;E9A | tr E9AP80 E9AP80_LEIMU | Putative 60S ribosomal protein L18    | 8  |
| 4.355783038 | 4.398801 | E9B350;E9B | tr E9B350 E9B350_LEIMU | Putative ribosomal protein L27 OS=l   | 10 |
| 5.233413193 | 4.396739 | E9B6S3;A0A | tr E9B6S3 E9B6S3_LEIMU | Putative PRP8 protein homologue (L    | 5  |
| 4.036166657 | 4.396021 | E9AXF3     | tr E9AXF3 E9AXF3_LEIMU | Uncharacterized protein OS=Leishm     | 10 |
| 4.590765911 | 4.395027 | E9ANI1     | tr E9ANI1 E9ANI1_LEIMU | Putative 14-3-3 protein OS=Leishma    | 5  |
| 4.642486646 | 4.393151 | E9AT08     | tr E9AT08 E9AT08_LEIMU | Uncharacterized protein OS=Leishm     | 3  |
| 4.610022635 | 4.392486 | E9AZM9     | tr E9AZM9 E9AZM9_LEIMU | Uncharacterized protein OS=Leish      | 2  |
| 3.558616049 | 4.390036 | E9AJZ6     | tr E9AJZ6 E9AJZ6_LEIMU | Putative exosome complex exonuclea    | 3  |
| 4.464900349 | 4.389818 | Q7Z031;E9A | tr Q7Z031 Q7Z031_LEIAM | Acidocalcisomal pyrophosphatase C     | 4  |
| 4.354049154 | 4.389596 | E9AYU0     | tr E9AYU0 E9AYU0_LEIMU | Putative nucleoporin OS=Leishman      | 8  |
| 4.226048175 | 4.387573 | E9AW91;Q5  | tr E9AW91 E9AW91_LEIMU | Putative mitochondrial RNA bindir     | 6  |
| 4.15706624  | 4.386764 | E9B1G2     | tr E9B1G2 E9B1G2_LEIMU | Putative ubiquitin hydrolase OS=Lei   | 2  |
| 5.129683093 | 4.386232 | E9AWK0     | tr E9AWK0 E9AWK0_LEIMU | Uncharacterized protein OS=Leish      | 3  |
| 4.479386682 | 4.385478 | E9ART6     | tr E9ART6 E9ART6_LEIMU | Plasma membrane ATPase OS=Leish       | 15 |
| 4.738453993 | 4.383259 | E9AW42     | tr E9AW42 E9AW42_LEIMU | ABC transporter-like protein OS=L     | 10 |
| 4.462875219 | 4.382646 | Q95PT4;E9A | tr Q95PT4 Q95PT4_LEIME | Myo-inositol-1-phosphate synthase     | 8  |
| 4.323318588 | 4.3821   | E9AKR8     | tr E9AKR8 E9AKR8_LEIMU | Putative 60S ribosomal protein L19    | 12 |
| 4.664174407 | 4.380975 | E9ANF6     | tr E9ANF6 E9ANF6_LEIMU | Putative seryl-tRNA synthetase OS=    | 10 |
| 4.411762896 | 4.377092 | E9B423     | tr E9B423 E9B423_LEIMU | Nucleolar GTP-binding protein 1 OS=   | 11 |
| 4.102575524 | 4.375415 | E9AQD9     | tr E9AQD9 E9AQD9_LEIMU | Putative glutaminyl-tRNA syntheta     | 5  |

|             |          |            |                        |                                        |    |
|-------------|----------|------------|------------------------|----------------------------------------|----|
| 4.504543927 | 4.374321 | E9AK89     | tr E9AK89 E9AK89_LEIMU | Uncharacterized protein OS=Leishm      | 5  |
| 4.490340816 | 4.373672 | E9ARS2     | tr E9ARS2 E9ARS2_LEIMU | Putative pyruvate dehydrogenase E:     | 6  |
| 4.257526325 | 4.373346 | E9AKI1     | tr E9AKI1 E9AKI1_LEIMU | Uncharacterized protein OS=Leishma     | 3  |
| 4.601544834 | 4.372769 | E9AWN5;E9  | tr E9AWN5 E9AWN5_LEIMU | Uncharacterized protein LMXM_2         | 7  |
| 4.581204461 | 4.372341 | E9AMIO     | tr E9AMIO E9AMIO_LEIMU | Uncharacterized protein OS=Leishr      | 15 |
| 3.47317929  | 4.371387 | E9ALY1     | tr E9ALY1 E9ALY1_LEIMU | Uncharacterized protein OS=Leishm:     | 2  |
| 4.790972707 | 4.370804 | E9AKE1;Q0  | tr E9AKE1 E9AKE1_LEIMU | Trypanothione reductase OS=Leishn      | 10 |
| 4.756191316 | 4.369925 | E9ARW2     | tr E9ARW2 E9ARW2_LEIMU | Clathrin light chain OS=Leishmani:     | 2  |
| 4.704201863 | 4.3698   | E9BOL7     | tr E9BOL7 E9BOL7_LEIMU | Putative adenosine kinase OS=Leishr    | 8  |
| 4.397110695 | 4.367035 | E9AQJ6;O7  | tr E9AQJ6 E9AQJ6_LEIMU | Uncharacterized protein OS=Leishm      | 6  |
| 4.95980164  | 4.366692 | E9AZ99     | tr E9AZ99 E9AZ99_LEIMU | Uncharacterized protein OS=Leishm      | 6  |
| 4.182639455 | 4.364806 | E9AZH5     | tr E9AZH5 E9AZH5_LEIMU | Putative pantothenate kinase subur     | 4  |
| 4.217947897 | 4.363154 | E9AJQ8     | tr E9AJQ8 E9AJQ8_LEIMU | Putative long chain fatty Acyl CoA sy  | 2  |
| 5.521174702 | 4.362964 | E8NHS4;E8  | tr E8NHS4 E8NHS4_LEIMU | WGS CADB00000000 data, contig 9        | 3  |
| 4.519489386 | 4.361781 | E9AQIO     | tr E9AQIO E9AQIO_LEIMU | Protein tyrosine phosphatase-like pr   | 5  |
| 4.50432575  | 4.36067  | E9ARD0;I3  | tr E9ARD0 E9ARD0_LEIMU | Elongation factor 1-alpha OS=Leish     | 26 |
| 4.540139387 | 4.359393 | E9ATM4     | tr E9ATM4 E9ATM4_LEIMU | ATP-dependent RNA helicase-like        | 5  |
| 4.746585379 | 4.357753 | E9AT19     | tr E9AT19 E9AT19_LEIMU | Dipeptidyl-peptidase 8-like serine pe  | 6  |
| 3.867693331 | 4.357639 | E9AVK1     | tr E9AVK1 E9AVK1_LEIMU | Uncharacterized protein OS=Leishr      | 4  |
| 4.396545734 | 4.356114 | E9B3H7     | tr E9B3H7 E9B3H7_LEIMU | Putative GIPL galf transferase OS=L    | 16 |
| 4.559171643 | 4.354874 | E9B6L0     | tr E9B6L0 E9B6L0_LEIMU | Uncharacterized protein OS=Leishm:     | 7  |
| 4.411447405 | 4.354275 | E9APW3;Q3  | tr E9APW3 E9APW3_LEIMU | Enolase OS=Leishmania mexicana         | 23 |
| 4.362278028 | 4.354148 | E9AYA1     | tr E9AYA1 E9AYA1_LEIMU | Uncharacterized protein OS=Leishr      | 2  |
| 3.7358792   | 4.35295  | E9AQP2     | tr E9AQP2 E9AQP2_LEIMU | Uncharacterized protein OS=Leishr      | 2  |
| 4.490700831 | 4.350309 | E9AXG9     | tr E9AXG9 E9AXG9_LEIMU | Peptidyl-prolyl cis-trans isomerase    | 12 |
| 4.396666306 | 4.349349 | E9AMD5     | tr E9AMD5 E9AMD5_LEIMU | Translation initiation factor-like p   | 4  |
| 4.259192292 | 4.348836 | E9ATF9     | tr E9ATF9 E9ATF9_LEIMU | Nascent polypeptide-associated con     | 7  |
| 4.869749801 | 4.346368 | E9AN80     | tr E9AN80 E9AN80_LEIMU | Uncharacterized protein OS=Leishn      | 4  |
| 4.447764951 | 4.345979 | E8NHIO     | tr E8NHIO E8NHIO_LEIMU | 40S ribosomal protein S3a OS=Leishi    | 18 |
| 4.860186037 | 4.34306  | E9AJV2     | tr E9AJV2 E9AJV2_LEIMU | Uncharacterized protein OS=Leishm:     | 13 |
| 4.704151769 | 4.342545 | P16126;E9A | sp P16126 DRTS_LEIAM   | Bifunctional dihydrofolate reductase-t | 4  |
| 4.987380783 | 4.340873 | E9B703     | tr E9B703 E9B703_LEIMU | Glyceraldehyde-3-phosphate dehyd       | 3  |
| 4.183098278 | 4.340106 | E9AST5     | tr E9AST5 E9AST5_LEIMU | Putative poly-zinc finger protein 2 O  | 6  |
| 4.284327189 | 4.339221 | E9AUU5     | tr E9AUU5 E9AUU5_LEIMU | Phosphatase-like protein OS=Leish      | 4  |
| 5.042065795 | 4.334729 | E9ALW2     | tr E9ALW2 E9ALW2_LEIMU | Uncharacterized protein OS=Leishi      | 2  |
| 4.471304047 | 4.333689 | E9ARB0     | tr E9ARB0 E9ARB0_LEIMU | Protein SDA1 OS=Leishmania mexic       | 9  |
| 4.537596603 | 4.330687 | E9B2C5     | tr E9B2C5 E9B2C5_LEIMU | Uncharacterized protein OS=Leishm      | 5  |
| 4.22895905  | 4.329699 | Q9GU60;E9  | tr Q9GU60 Q9GU60_LEIAM | Kinetoplast membrane protein 11        | 9  |
| 4.848173638 | 4.328427 | E9ANA1     | tr E9ANA1 E9ANA1_LEIMU | Putative small GTP-binding protein     | 4  |
| 4.90848489  | 4.327483 | E9AM73     | tr E9AM73 E9AM73_LEIMU | Putative tryptophanyl-tRNA synth       | 4  |
| 4.677901997 | 4.326282 | E9B3B0     | tr E9B3B0 E9B3B0_LEIMU | Putative chaperonin alpha subunit C    | 12 |
| 4.519917089 | 4.32547  | E9APU4     | tr E9APU4 E9APU4_LEIMU | ADP/ATP mitochondrial carrier-like     | 5  |
| 4.664736605 | 4.323398 | E9AVY2     | tr E9AVY2 E9AVY2_LEIMU | Putative ATP-dependent DEAD/H RI       | 5  |
| 4.559169239 | 4.322961 | E9B5F8     | tr E9B5F8 E9B5F8_LEIMU | Vacuolar ATP synthase catalytic sub    | 9  |
| 5.125972865 | 4.321648 | E9B0G8     | tr E9B0G8 E9B0G8_LEIMU | Sulfhydryl oxidase OS=Leishmania r     | 2  |
| 4.243483652 | 4.318453 | E9AV59     | tr E9AV59 E9AV59_LEIMU | Xanthine phosphoribosyltransferase     | 4  |
| 4.498426211 | 4.31819  | E9AX84     | tr E9AX84 E9AX84_LEIMU | Putative poly(A)-binding protein OS    | 18 |
| 4.301181497 | 4.317601 | E9AKJ5     | tr E9AKJ5 E9AKJ5_LEIMU | Uncharacterized protein OS=Leishma     | 7  |
| 4.530329356 | 4.316114 | E8NHJ5;E9A | tr E8NHJ5 E8NHJ5_LEIMU | WGS CADB00000000 data, contig 4:       | 9  |
| 3.721408382 | 4.314204 | Q9GNZ4;F6  | tr Q9GNZ4 Q9GNZ4_LEIME | 3-nucleotidase/nuclease OS=Leishi      | 2  |
| 4.398056939 | 4.313627 | E9B4G0     | tr E9B4G0 E9B4G0_LEIMU | Coatomer subunit beta OS=Leishma       | 2  |
| 4.49633777  | 4.3135   | E9B5S0     | tr E9B5S0 E9B5S0_LEIMU | Putative serine palmitoyltransferase   | 2  |

|             |          |            |                        |                                        |    |
|-------------|----------|------------|------------------------|----------------------------------------|----|
| 5.048554478 | 4.312972 | E9B506;A7Y | tr E9B506 E9B506_LEIMU | Uncharacterized protein OS=Leishm      | 3  |
| 4.697625752 | 4.312806 | E9ARS1     | tr E9ARS1 E9ARS1_LEIMU | Putative heat shock protein OS=Leis    | 39 |
| 4.355166098 | 4.308777 | E9AME1     | tr E9AME1 E9AME1_LEIMU | Uncharacterized protein OS=Leish       | 4  |
| 4.426697665 | 4.306828 | E9AV89     | tr E9AV89 E9AV89_LEIMU | Putative 60S ribosomal protein L9 C    | 12 |
| 4.462225928 | 4.305661 | E9AS06     | tr E9AS06 E9AS06_LEIMU | Methionine aminopeptidase OS=Lei:      | 4  |
| 4.548188887 | 4.305485 | E9AQB1     | tr E9AQB1 E9AQB1_LEIMU | 60S acidic ribosomal protein P2 OS     | 7  |
| 3.951471654 | 4.305338 | E9B1E9     | tr E9B1E9 E9B1E9_LEIMU | Putative 5-methyltetrahydropteroyl     | 5  |
| 4.744880868 | 4.304094 | E9B699     | tr E9B699 E9B699_LEIMU | Putative RNA-binding protein OS=Le     | 18 |
| 4.479322123 | 4.303351 | E9AQA0     | tr E9AQA0 E9AQA0_LEIMU | NAD-specific glutamate dehydroge       | 33 |
| 4.022114486 | 4.30165  | E9APM1     | tr E9APM1 E9APM1_LEIMU | Uncharacterized protein OS=Leish       | 2  |
| 4.64127     | 4.299084 | E9B405;A0A | tr E9B405 E9B405_LEIMU | Thiamine biosynthesis-like protein C   | 3  |
| 4.894086636 | 4.298455 | E9ALL7     | tr E9ALL7 E9ALL7_LEIMU | Uncharacterized protein OS=Leishma     | 3  |
| 5.390603815 | 4.297575 | E9B0Q0     | tr E9B0Q0 E9B0Q0_LEIMU | Small nuclear ribonucleoprotein E C    | 3  |
| 4.603582889 | 4.297204 | E9AT09     | tr E9AT09 E9AT09_LEIMU | Glucokinase 1-like protein OS=Leish    | 2  |
| 4.94918191  | 4.29398  | E9ARY2     | tr E9ARY2 E9ARY2_LEIMU | RNA binding protein OS=Leishmania      | 2  |
| 4.646337104 | 4.293507 | E9AYD6     | tr E9AYD6 E9AYD6_LEIMU | Putative thimet oligopeptidase (Me     | 9  |
| 4.137183131 | 4.292901 | E9AR41     | tr E9AR41 E9AR41_LEIMU | Uncharacterized protein OS=Leishm      | 2  |
| 4.861618568 | 4.291593 | E9B1E7     | tr E9B1E7 E9B1E7_LEIMU | Putative 60S acidic ribosomal protei   | 5  |
| 4.946099205 | 4.288986 | E9B078     | tr E9B078 E9B078_LEIMU | Putative 40S ribosomal protein S17     | 12 |
| 4.454958327 | 4.286884 | E9AWK5     | tr E9AWK5 E9AWK5_LEIMU | Uncharacterized protein OS=Leish       | 3  |
| 4.708632173 | 4.286208 | E9AWR8     | tr E9AWR8 E9AWR8_LEIMU | Putative malic enzyme OS=Leishm        | 10 |
| 4.678798314 | 4.284525 | E9ATT5;E9A | tr E9ATT5 E9ATT5_LEIMU | 40S ribosomal protein SA OS=Leishn     | 13 |
| 5.738550753 | 4.283511 | E9B081     | tr E9B081 E9B081_LEIMU | Putative splicing factor 3B subunit 1  | 2  |
| 6.180479657 | 4.28234  | E9AZH7     | tr E9AZH7 E9AZH7_LEIMU | Putative RNA binding protein OS=Le     | 2  |
| 4.075531433 | 4.282051 | E9ARN1     | tr E9ARN1 E9ARN1_LEIMU | Uncharacterized protein OS=Leishn      | 3  |
| 4.242595703 | 4.281824 | E9AZF7     | tr E9AZF7 E9AZF7_LEIMU | Uncharacterized protein OS=Leishm      | 4  |
| 4.452038646 | 4.279998 | E9ARI2     | tr E9ARI2 E9ARI2_LEIMU | Carboxypeptidase OS=Leishmania m       | 5  |
| 4.085719358 | 4.279871 | E9AQQ7     | tr E9AQQ7 E9AQQ7_LEIMU | Uncharacterized protein OS=Leish       | 2  |
| 4.633389742 | 4.27908  | E9ARD9     | tr E9ARD9 E9ARD9_LEIMU | Diphosphomevalonate decarboxyla        | 3  |
| 4.327339677 | 4.276823 | E9ATU9     | tr E9ATU9 E9ATU9_LEIMU | Uncharacterized protein OS=Leishr      | 12 |
| 4.425858588 | 4.275005 | E9B5F7     | tr E9B5F7 E9B5F7_LEIMU | Transmembrane 9 superfamily mem        | 3  |
| 4.51372415  | 4.273684 | E9AUG4     | tr E9AUG4 E9AUG4_LEIMU | Uncharacterized protein OS=Leishr      | 2  |
| 3.793061761 | 4.272842 | E9AYF0     | tr E9AYF0 E9AYF0_LEIMU | Putative cytochrome c oxidase subu     | 3  |
| 4.66828532  | 4.271143 | E9ALG1     | tr E9ALG1 E9ALG1_LEIMU | Uncharacterized protein OS=Leishm      | 6  |
| 5.146588409 | 4.269538 | E9AXI5     | tr E9AXI5 E9AXI5_LEIMU | Uncharacterized protein OS=Leishma     | 3  |
| 4.840803368 | 4.267678 | E9AV28     | tr E9AV28 E9AV28_LEIMU | Putative RNA helicase OS=Leishmar      | 4  |
| 4.889638864 | 4.264493 | E9ANJ3     | tr E9ANJ3 E9ANJ3_LEIMU | Putative pumilio-repeat, RNA-bindin    | 8  |
| 4.850048718 | 4.264327 | E9ALY6;Q9L | tr E9ALY6 E9ALY6_LEIMU | Putative ADP ribosylation factor 3 O'  | 11 |
| 5.51985851  | 4.263415 | E9AUN0     | tr E9AUN0 E9AUN0_LEIMU | Uncharacterized protein OS=Leishr      | 2  |
| 4.631222783 | 4.261697 | Q8MPM3;E!  | tr Q8MPM3 Q8MPM3_LEIME | Transketolase OS=Leishmania m          | 8  |
| 4.159841845 | 4.26096  | E9AQC4     | tr E9AQC4 E9AQC4_LEIMU | Uncharacterized protein OS=Leishr      | 2  |
| 4.436902133 | 4.260145 | E9B6R4     | tr E9B6R4 E9B6R4_LEIMU | T-complex protein 1 subunit eta OS:    | 19 |
| 4.294343718 | 4.259554 | E9B552     | tr E9B552 E9B552_LEIMU | RuvB-like helicase OS=Leishmania m     | 9  |
| 4.589408617 | 4.253597 | E9ASK9     | tr E9ASK9 E9ASK9_LEIMU | Eukaryotic translation initiation fact | 2  |
| 5.084352871 | 4.251351 | E9ATX3     | tr E9ATX3 E9ATX3_LEIMU | Putative NADH dehydrogenase OS=l       | 9  |
| 4.384045209 | 4.249657 | E9ALW5;E9, | tr E9ALW5 E9ALW5_LEIMU | Putative ribosomal protein L1a OS      | 14 |
| 4.064653837 | 4.246875 | E9B5I1     | tr E9B5I1 E9B5I1_LEIMU | Putative dynein heavy chain OS=Leish   | 5  |
| 4.797955809 | 4.246707 | E9AQL1;Q9I | tr E9AQL1 E9AQL1_LEIMU | Dihydroorotate dehydrogenase (fur      | 3  |
| 4.609125153 | 4.246606 | E9AKT6     | tr E9AKT6 E9AKT6_LEIMU | Putative 60S ribosomal protein L23a    | 9  |
| 4.803899422 | 4.246218 | E9AXE9     | tr E9AXE9 E9AXE9_LEIMU | Uncharacterized protein OS=Leishm      | 5  |
| 4.81475679  | 4.24403  | E9ATH0     | tr E9ATH0 E9ATH0_LEIMU | Eukaryotic translation initiation fact | 7  |
| 5.076164907 | 4.243891 | E9AT43     | tr E9AT43 E9AT43_LEIMU | Dihydrolipoamide acetyltransferase     | 6  |

|             |          |            |                                                               |    |
|-------------|----------|------------|---------------------------------------------------------------|----|
| 4.770197002 | 4.243636 | E9B632     | tr E9B632 E9B632_LEIMU Putative reiske iron-sulfur protein O  | 3  |
| 4.222213114 | 4.243266 | E9AT78     | tr E9AT78 E9AT78_LEIMU Putative ATP-dependent RNA helica      | 4  |
| 4.591758333 | 4.241166 | E9ALV7     | tr E9ALV7 E9ALV7_LEIMU Tryparedoxin OS=Leishmania mexic       | 6  |
| 5.463667758 | 4.240902 | E9AMI9     | tr E9AMI9 E9AMI9_LEIMU Uncharacterized protein OS=Leishr      | 3  |
| 4.574043615 | 4.237132 | E9APJ0     | tr E9APJ0 E9APJ0_LEIMU Putative chaperonin TCP20 OS=Leish     | 12 |
| 4.609232289 | 4.236643 | E9B6K2     | tr E9B6K2 E9B6K2_LEIMU Putative cystathione gamma lyase C     | 14 |
| 4.150937053 | 4.236375 | E9AU90     | tr E9AU90 E9AU90_LEIMU Similarity to endo-1-like protein OS   | 5  |
| 6.399349307 | 4.236069 | Q8T381;E9A | tr Q8T381 Q8T381_LEIME Mercaptopyruvate sulfurtransferase     | 4  |
| 4.545842777 | 4.23214  | E9AN39     | tr E9AN39 E9AN39_LEIMU Isocitrate dehydrogenase [NADP] C      | 15 |
| 4.751328746 | 4.230022 | E9AVE1     | tr E9AVE1 E9AVE1_LEIMU Putative RNA helicase OS=Leishman      | 11 |
| 4.322058745 | 4.229974 | E9AU26     | tr E9AU26 E9AU26_LEIMU Uncharacterized protein OS=Leishn      | 2  |
| 4.384850476 | 4.22939  | E9B6C6     | tr E9B6C6 E9B6C6_LEIMU Uncharacterized protein OS=Leishm      | 4  |
| 4.882179344 | 4.228798 | E9APB2     | tr E9APB2 E9APB2_LEIMU Uncharacterized protein OS=Leishr      | 16 |
| 4.605129086 | 4.227731 | E9B483     | tr E9B483 E9B483_LEIMU Uncharacterized protein OS=Leishm      | 16 |
| 4.773992447 | 4.227601 | E9ASB9     | tr E9ASB9 E9ASB9_LEIMU Histone H4 OS=Leishmania mexican       | 4  |
| 4.065392894 | 4.225651 | E9APU2     | tr E9APU2 E9APU2_LEIMU Uncharacterized protein OS=Leishn      | 2  |
| 4.366821935 | 4.225566 | E9AXI8     | tr E9AXI8 E9AXI8_LEIMU Uncharacterized protein OS=Leishma     | 3  |
| 4.689965553 | 4.223897 | E9AT73     | tr E9AT73 E9AT73_LEIMU Succinate--CoA ligase [ADP-forming]    | 12 |
| 4.610497702 | 4.22219  | E9B478     | tr E9B478 E9B478_LEIMU Putative heat shock protein OS=Leis    | 27 |
| 4.683378702 | 4.221973 | E9AT13     | tr E9AT13 E9AT13_LEIMU Putative tyrosine aminotransferase     | 7  |
| 4.569379371 | 4.221841 | E9B5D9     | tr E9B5D9 E9B5D9_LEIMU RuvB-like helicase OS=Leishmania n     | 4  |
| 4.485136971 | 4.218553 | E9AZQ5     | tr E9AZQ5 E9AZQ5_LEIMU Ribonucleoside-diphosphate reduct      | 4  |
| 4.357822232 | 4.216757 | E9ANI6     | tr E9ANI6 E9ANI6_LEIMU Tubulin-tyrsoine ligase-like protein C | 3  |
| 4.5128421   | 4.215613 | E9AWJ0     | tr E9AWJ0 E9AWJ0_LEIMU Uncharacterized protein OS=Leishr      | 3  |
| 5.334225101 | 4.214588 | E9B264     | tr E9B264 E9B264_LEIMU Acetoin dehydrogenase e3 compon        | 2  |
| 4.468584966 | 4.213154 | E9B2I6     | tr E9B2I6 E9B2I6_LEIMU Uncharacterized protein OS=Leishma     | 3  |
| 4.204896365 | 4.212838 | E9AVH3     | tr E9AVH3 E9AVH3_LEIMU Putative ATP synthase F1 subunit g     | 6  |
| 4.957346667 | 4.210697 | E9B010     | tr E9B010 E9B010_LEIMU Uncharacterized protein OS=Leishm      | 3  |
| 4.841634225 | 4.208288 | E9AJU1     | tr E9AJU1 E9AJU1_LEIMU Uncharacterized protein OS=Leishm      | 3  |
| 4.197599405 | 4.204196 | E9B1S5     | tr E9B1S5 E9B1S5_LEIMU p-glycoprotein e OS=Leishmania me:     | 2  |
| 4.784723945 | 4.201804 | E9B494     | tr E9B494 E9B494_LEIMU Isocitrate dehydrogenase [NADP] O      | 3  |
| 4.940194165 | 4.200603 | E9ANP4     | tr E9ANP4 E9ANP4_LEIMU Pyruvate, phosphate dikinase OS=L      | 11 |
| 4.566433527 | 4.200523 | E9AS22     | tr E9AS22 E9AS22_LEIMU Putative kinesin OS=Leishmania me      | 6  |
| 4.720486523 | 4.199375 | E9AVE7     | tr E9AVE7 E9AVE7_LEIMU Uncharacterized protein OS=Leishr      | 4  |
| 4.71162467  | 4.198147 | E9ARC2     | tr E9ARC2 E9ARC2_LEIMU Uncharacterized protein OS=Leishr      | 20 |
| 4.495476032 | 4.19565  | E9AZD6     | tr E9AZD6 E9AZD6_LEIMU Transcription elongation regulator-l   | 6  |
| 4.900405017 | 4.193182 | E9AZK8     | tr E9AZK8 E9AZK8_LEIMU Carbonic anhydrase-like protein OS-    | 5  |
| 5.014130687 | 4.192996 | E9AU73     | tr E9AU73 E9AU73_LEIMU Uncharacterized protein OS=Leishn      | 3  |
| 5.164678417 | 4.192703 | E9ARY5     | tr E9ARY5 E9ARY5_LEIMU Uncharacterized protein OS=Leishm      | 3  |
| 4.583079286 | 4.191442 | E9ANU8     | tr E9ANU8 E9ANU8_LEIMU Proteasome regulatory ATPase suk       | 5  |
| 5.149845107 | 4.190928 | E9AXR6     | tr E9AXR6 E9AXR6_LEIMU Uncharacterized protein OS=Leishr      | 3  |
| 4.013362955 | 4.190516 | Q4TZP8;E9E | tr Q4TZP8 Q4TZP8_LEIME Putative mitogen-activated protein     | 2  |
| 4.479120307 | 4.18767  | E9ASE5     | tr E9ASE5 E9ASE5_LEIMU Uncharacterized protein OS=Leishm      | 2  |
| 4.265635568 | 4.187265 | E9AYV3     | tr E9AYV3 E9AYV3_LEIMU Putative radial spoke protein 3 OS=l   | 3  |
| 5.192226095 | 4.18491  | E9B5D3     | tr E9B5D3 E9B5D3_LEIMU DNA topoisomerase I OS=Leishman        | 9  |
| 4.258245013 | 4.183767 | E9ANC5     | tr E9ANC5 E9ANC5_LEIMU Uncharacterized protein OS=Leishn      | 5  |
| 4.728116878 | 4.18358  | E9B660     | tr E9B660 E9B660_LEIMU Uncharacterized protein OS=Leishm      | 3  |
| 4.623940834 | 4.183223 | E9AJC9     | tr E9AJC9 E9AJC9_LEIMU 40S ribosomal protein S7 OS=Leishm     | 10 |
| 4.889839984 | 4.183153 | E9B6I5     | tr E9B6I5 E9B6I5_LEIMU Putative ubiquitin-activating enzyme   | 6  |
| 4.601106259 | 4.183043 | E9B2E8     | tr E9B2E8 E9B2E8_LEIMU Uncharacterized protein OS=Leishm      | 11 |
| 4.958085624 | 4.179914 | E9AJU3     | tr E9AJU3 E9AJU3_LEIMU Putative arginine N-methyltransfera    | 4  |
| 5.110737029 | 4.178759 | E9AKQ4     | tr E9AKQ4 E9AKQ4_LEIMU Putative 5-3 exonuclease OS=Leish      | 8  |

|             |          |            |                        |                                        |    |
|-------------|----------|------------|------------------------|----------------------------------------|----|
| 5.268938879 | 4.178293 | E9B4X7     | tr E9B4X7 E9B4X7_LEIMU | Uncharacterized protein OS=Leishm      | 3  |
| 3.868245113 | 4.178242 | E9ATM9     | tr E9ATM9 E9ATM9_LEIMU | Putative mitochondrial intermedia      | 6  |
| 4.929500431 | 4.177617 | E9AW59     | tr E9AW59 E9AW59_LEIMU | Putative 5-3 exonuclease XRNC OS=      | 2  |
| 4.241790485 | 4.175285 | E9B340     | tr E9B340 E9B340_LEIMU | Uncharacterized protein OS=Leishm      | 2  |
| 4.375912606 | 4.17481  | E9ARA1     | tr E9ARA1 E9ARA1_LEIMU | Putative translation initiation factoi | 11 |
| 5.430603791 | 4.173894 | E9ARJ6     | tr E9ARJ6 E9ARJ6_LEIMU | Putative RNA binding protein OS=Lei    | 2  |
| 4.763572592 | 4.173634 | Q4KXA7;E9  | tr Q4KXA7 Q4KXA7_LEIME | Cytoplasmic dynein heavy chain 2.2     | 5  |
| 4.672916637 | 4.173228 | E9AJH6     | tr E9AJH6 E9AJH6_LEIMU | Uncharacterized protein OS=Leishm      | 2  |
| 4.766688537 | 4.172762 | E9AW40     | tr E9AW40 E9AW40_LEIMU | Putative NADP-dependent alcoh          | 12 |
| 4.670977183 | 4.172743 | E9AXH6     | tr E9AXH6 E9AXH6_LEIMU | Putative dynein heavy chain OS=Lei     | 16 |
| 4.60341456  | 4.168922 | E9AV90;Q8  | tr E9AV90 E9AV90_LEIMU | Putative 40S ribosomal protein S23     | 4  |
| 3.912037069 | 4.167286 | E9ALT4     | tr E9ALT4 E9ALT4_LEIMU | Uncharacterized protein OS=Leishm;     | 2  |
| 4.087461166 | 4.166427 | E9AQC1     | tr E9AQC1 E9AQC1_LEIMU | DNA topoisomerase 2 OS=Leishma         | 2  |
| 4.59362843  | 4.165991 | E9AZR2     | tr E9AZR2 E9AZR2_LEIMU | 40S ribosomal protein S14 OS=Leish     | 5  |
| 4.085573765 | 4.164075 | E9B1T9     | tr E9B1T9 E9B1T9_LEIMU | Uncharacterized protein OS=Leishm      | 2  |
| 4.621615685 | 4.163196 | E9AMH0     | tr E9AMH0 E9AMH0_LEIMU | Uncharacterized protein OS=Leish       | 6  |
| 5.730657611 | 4.160995 | E9AYX1     | tr E9AYX1 E9AYX1_LEIMU | Uncharacterized protein OS=Leishm      | 5  |
| 4.579470346 | 4.160739 | E9B1D4     | tr E9B1D4 E9B1D4_LEIMU | Putative ATP synthase, epsilon chai    | 4  |
| 4.947148921 | 4.160733 | E9AW86     | tr E9AW86 E9AW86_LEIMU | Acetyl-coenzyme A synthetase OS        | 8  |
| 4.642216551 | 4.160393 | E9ANH0     | tr E9ANH0 E9ANH0_LEIMU | Proteasome subunit alpha type OS       | 2  |
| 3.530460357 | 4.160236 | E9AV30     | tr E9AV30 E9AV30_LEIMU | Putative phosphoglucomutase OS=l       | 2  |
| 5.088818504 | 4.1593   | E9B5N7     | tr E9B5N7 E9B5N7_LEIMU | Uncharacterized protein OS=Leishr      | 3  |
| 4.838608552 | 4.1576   | O46368;E9E | tr O46368 O46368_LEIME | Surface protein amastin OS=Leishm      | 2  |
| 4.63362482  | 4.15553  | E9AQU2;A0  | tr E9AQU2 E9AQU2_LEIMU | Putative cytochrome c OS=Leishm;       | 3  |
| 4.826370937 | 4.154951 | E9AJS7;E9A | tr E9AJS7 E9AJS7_LEIMU | Putative 60S acidic ribosomal protein  | 4  |
| 5.34596858  | 4.153853 | E9AM90     | tr E9AM90 E9AM90_LEIMU | Uncharacterized protein OS=Leish       | 5  |
| 5.792417834 | 4.153403 | E9B601     | tr E9B601 E9B601_LEIMU | Putative short chain dehydrogenase     | 2  |
| 4.770953492 | 4.151824 | E9AUZ2;E9  | tr E9AUZ2 E9AUZ2_LEIMU | Phosphotransferase OS=Leishmania;      | 30 |
| 4.752166845 | 4.151677 | E9AQL8;Q9I | tr E9AQL8 E9AQL8_LEIMU | Putative carbamoyl-phosphate synt      | 32 |
| 4.954872689 | 4.151448 | E9AKI8     | tr E9AKI8 E9AKI8_LEIMU | Uncharacterized protein OS=Leishma     | 3  |
| 5.063067918 | 4.149425 | E9B2F7     | tr E9B2F7 E9B2F7_LEIMU | Uncharacterized protein OS=Leishm;     | 7  |
| 5.052378632 | 4.147141 | E9AZQ9     | tr E9AZQ9 E9AZQ9_LEIMU | Uncharacterized protein OS=Leishn      | 5  |
| 5.143430404 | 4.147026 | E9B714     | tr E9B714 E9B714_LEIMU | Uncharacterized protein OS=Leishm      | 6  |
| 4.693668294 | 4.146379 | E9B545     | tr E9B545 E9B545_LEIMU | Uncharacterized protein OS=Leishm      | 11 |
| 4.376804373 | 4.144608 | E9B258     | tr E9B258 E9B258_LEIMU | Uncharacterized protein OS=Leishm      | 3  |
| 4.094374699 | 4.143764 | E9AKF2     | tr E9AKF2 E9AKF2_LEIMU | Nucleolar GTP-binding protein 2 OS=    | 5  |
| 3.849283536 | 4.143093 | E9B4I7     | tr E9B4I7 E9B4I7_LEIMU | Uncharacterized protein OS=Leishma     | 3  |
| 4.135917595 | 4.139071 | E9B012     | tr E9B012 E9B012_LEIMU | Putative zinc transporter OS=Leishr    | 3  |
| 4.631211586 | 4.138833 | E9AP13     | tr E9AP13 E9AP13_LEIMU | NADH:flavin oxidoreductase/NADH        | 10 |
| 4.676725059 | 4.138083 | E9AM47     | tr E9AM47 E9AM47_LEIMU | Uncharacterized protein OS=Leish       | 4  |
| 5.397404525 | 4.136553 | Q0QW09;E9  | tr Q0QW09 Q0QW09_LEIME | Malate dehydrogenase OS=Leish          | 2  |
| 4.875064979 | 4.134963 | E9AXN4     | tr E9AXN4 E9AXN4_LEIMU | Uncharacterized protein OS=Leishn      | 8  |
| 4.778892058 | 4.131978 | E9B2G6;E9  | tr E9B2G6 E9B2G6_LEIMU | 40S ribosomal protein S2 OS=Leishr     | 11 |
| 4.506185669 | 4.13121  | E9B6N3     | tr E9B6N3 E9B6N3_LEIMU | Uncharacterized protein OS=Leishr      | 2  |
| 4.792035678 | 4.130556 | E9APT6     | tr E9APT6 E9APT6_LEIMU | Glutathione synthetase OS=Leishma      | 2  |
| 4.458633111 | 4.129048 | E9ARI8     | tr E9ARI8 E9ARI8_LEIMU | Aconitate hydratase OS=Leishmania      | 18 |
| 5.148050182 | 4.128405 | E9AKU4     | tr E9AKU4 E9AKU4_LEIMU | Putative lanosterol synthase OS=Le     | 3  |
| 4.079573116 | 4.128014 | E9B6Q0     | tr E9B6Q0 E9B6Q0_LEIMU | Uncharacterized protein OS=Leishn      | 6  |
| 5.577650589 | 4.127724 | E9B0Q4;A0  | tr E9B0Q4 E9B0Q4_LEIMU | Putative Pyridoxal kinase OS=Leishr    | 3  |
| 4.779969786 | 4.125448 | E9AS23     | tr E9AS23 E9AS23_LEIMU | Glycosomal malate dehydrogenase (      | 15 |
| 5.147499882 | 4.12399  | E9AXK5     | tr E9AXK5 E9AXK5_LEIMU | Uncharacterized protein OS=Leishm      | 2  |
| 4.847596855 | 4.123145 | E9B1E2     | tr E9B1E2 E9B1E2_LEIMU | Uncharacterized protein OS=Leishm      | 14 |

|             |          |            |                        |                                        |    |
|-------------|----------|------------|------------------------|----------------------------------------|----|
| 4.60243871  | 4.120336 | E9ATG7     | tr E9ATG7 E9ATG7_LEIMU | Uncharacterized protein OS=Leishr      | 2  |
| 4.714828547 | 4.119899 | E9B0D0     | tr E9B0D0 E9B0D0_LEIMU | Uncharacterized protein OS=Leishr      | 3  |
| 4.983080045 | 4.119805 | E9ARJ0     | tr E9ARJ0 E9ARJ0_LEIMU | Uncharacterized protein OS=Leishm      | 3  |
| 4.733373566 | 4.118867 | E9AUK8     | tr E9AUK8 E9AUK8_LEIMU | rRNA biogenesis protein-like protei    | 4  |
| 3.754551528 | 4.118788 | E9AJX4     | tr E9AJX4 E9AJX4_LEIMU | Putative peter pan protein OS=Leishr   | 2  |
| 4.513012572 | 4.117922 | E9ARW7     | tr E9ARW7 E9ARW7_LEIMU | Putative aminopeptidase OS=Leisl       | 11 |
| 4.437827898 | 4.116673 | E9B2N1     | tr E9B2N1 E9B2N1_LEIMU | Putative dynein OS=Leishmania me       | 6  |
| 4.11351191  | 4.115729 | E9AL20     | tr E9AL20 E9AL20_LEIMU | Pitrylsin-like metalloprotease (Meta   | 2  |
| 5.627006233 | 4.112806 | E9AUT3     | tr E9AUT3 E9AUT3_LEIMU | Uncharacterized protein OS=Leishr      | 3  |
| 5.019007475 | 4.111107 | E9AS17     | tr E9AS17 E9AS17_LEIMU | Uncharacterized protein OS=Leishm      | 2  |
| 4.967429829 | 4.110908 | E9B1G7     | tr E9B1G7 E9B1G7_LEIMU | Putative nucleolar protein OS=Leish    | 6  |
| 4.125815431 | 4.110104 | E9AN53;E9A | tr E9AN53 E9AN53_LEIMU | GP63, leishmanolysin OS=Leishman       | 2  |
| 4.309074076 | 4.108772 | E9B1B4     | tr E9B1B4 E9B1B4_LEIMU | Putative CAS/CSE/importin domain       | 2  |
| 4.721180441 | 4.108329 | E9B0H1;E9A | tr E9B0H1 E9B0H1_LEIMU | Putative aspartyl-tRNA synthetase (    | 9  |
| 5.010246277 | 4.107738 | E9B073     | tr E9B073 E9B073_LEIMU | Putative acyl-CoA dehydrogenase O      | 7  |
| 3.823659175 | 4.104739 | E9AMB3     | tr E9AMB3 E9AMB3_LEIMU | Uncharacterized protein OS=Leish       | 2  |
| 4.488587835 | 4.104374 | E9ASN7     | tr E9ASN7 E9ASN7_LEIMU | Uncharacterized protein OS=Leishr      | 4  |
| 4.584872111 | 4.103311 | E9ARW8     | tr E9ARW8 E9ARW8_LEIMU | Uncharacterized protein OS=Leish       | 9  |
| 4.705661698 | 4.102575 | E9AX57     | tr E9AX57 E9AX57_LEIMU | Uncharacterized protein OS=Leishm      | 11 |
| 4.662430618 | 4.101624 | Q86PL7;E9A | tr Q86PL7 Q86PL7_LEIME | Putative small GTP-binding protein (   | 2  |
| 4.826529485 | 4.101616 | E9B6L6     | tr E9B6L6 E9B6L6_LEIMU | Uncharacterized protein OS=Leishm      | 2  |
| 4.996882244 | 4.099674 | E9AUS4     | tr E9AUS4 E9AUS4_LEIMU | Coatomer subunit beta OS=Leishm        | 2  |
| 4.55508227  | 4.095538 | E9ALY7     | tr E9ALY7 E9ALY7_LEIMU | Uncharacterized protein OS=Leishm      | 4  |
| 4.880573929 | 4.095078 | E9ALH3     | tr E9ALH3 E9ALH3_LEIMU | ATP-dependent 6-phosphofructokin       | 11 |
| 4.474538299 | 4.094961 | E9AZE5     | tr E9AZE5 E9AZE5_LEIMU | Uncharacterized protein OS=Leishm      | 3  |
| 4.596706651 | 4.091661 | E9B578;E9B | tr E9B578 E9B578_LEIMU | Putative ribosomal protein L3 OS=Le    | 12 |
| 4.757682577 | 4.089052 | E9AZ29     | tr E9AZ29 E9AZ29_LEIMU | Putative T-complex protein 1, beta s   | 17 |
| 4.823480139 | 4.087936 | E9AVT0     | tr E9AVT0 E9AVT0_LEIMU | Uncharacterized protein OS=Leishr      | 2  |
| 4.653035713 | 4.080778 | E9AK58     | tr E9AK58 E9AK58_LEIMU | Putative 60S ribosomal protein L10     | 14 |
| 4.33597353  | 4.079774 | E9AVS5;E9A | tr E9AVS5 E9AVS5_LEIMU | Uncharacterized protein OS=Leishm      | 2  |
| 4.34060589  | 4.079068 | E9AMQ3     | tr E9AMQ3 E9AMQ3_LEIMU | Uncharacterized protein OS=Leisl       | 5  |
| 4.609432841 | 4.078252 | E9ASQ3     | tr E9ASQ3 E9ASQ3_LEIMU | Putative N-acetyltransferase subun     | 9  |
| 4.629683072 | 4.076005 | E9ANF3     | tr E9ANF3 E9ANF3_LEIMU | Uncharacterized protein OS=Leishr      | 9  |
| 4.547327886 | 4.075115 | Q2TUW2;E9  | tr Q2TUW2 Q2TUW2_LEIAM | Inosine-5-monophosphate dehydc         | 7  |
| 4.58581574  | 4.072902 | E9AR70     | tr E9AR70 E9AR70_LEIMU | Uncharacterized protein OS=Leishm      | 2  |
| 5.302752814 | 4.071939 | E9APN6     | tr E9APN6 E9APN6_LEIMU | Uncharacterized protein OS=Leishn      | 9  |
| 5.643211159 | 4.07001  | E9B4B4     | tr E9B4B4 E9B4B4_LEIMU | Putative translation initiation factor | 6  |
| 4.737165428 | 4.069283 | E9AX88     | tr E9AX88 E9AX88_LEIMU | Putative electron transfer flavoprot   | 4  |
| 4.754751383 | 4.068411 | E9B476     | tr E9B476 E9B476_LEIMU | Uncharacterized protein OS=Leishm      | 2  |
| 5.077934046 | 4.066804 | E9ARL9     | tr E9ARL9 E9ARL9_LEIMU | Uncharacterized protein OS=Leishm      | 23 |
| 4.79843644  | 4.06634  | E9ANJ4     | tr E9ANJ4 E9ANJ4_LEIMU | Uncharacterized protein OS=Leishm      | 7  |
| 4.435344102 | 4.066075 | E9AZU3     | tr E9AZU3 E9AZU3_LEIMU | Putative p450 reductase OS=Leishr      | 2  |
| 6.168411861 | 4.064124 | E9B584     | tr E9B584 E9B584_LEIMU | Uncharacterized protein OS=Leishm      | 2  |
| 4.397198858 | 4.063594 | E9AK29     | tr E9AK29 E9AK29_LEIMU | 60S ribosomal protein L11 (L5, L16)    | 9  |
| 4.538472565 | 4.062717 | E9AM28     | tr E9AM28 E9AM28_LEIMU | Cofilin-like protein OS=Leishmania     | 6  |
| 4.659198674 | 4.062222 | E9AJD9     | tr E9AJD9 E9AJD9_LEIMU | Putative long-chain-fatty-acid-CoA li  | 10 |
| 4.635142102 | 4.061834 | E9B155     | tr E9B155 E9B155_LEIMU | Putative chaperonin HSP60/CNP60 (      | 5  |
| 4.061595636 | 4.061659 | E9AMM1     | tr E9AMM1 E9AMM1_LEIMU | Uncharacterized protein OS=Leis        | 3  |
| 4.106163422 | 4.061101 | E9AQG1     | tr E9AQG1 E9AQG1_LEIMU | Uncharacterized protein OS=Leishi      | 2  |
| 4.855069818 | 4.060434 | E9AMJ4     | tr E9AMJ4 E9AMJ4_LEIMU | Uncharacterized protein OS=Leishn      | 2  |
| 5.370916146 | 4.05913  | E9B4W6;E9  | tr E9B4W6 E9B4W6_LEIMU | D-isomer specific 2-hydroxyacid de     | 6  |
| 4.849934674 | 4.058836 | E9B683     | tr E9B683 E9B683_LEIMU | 60S ribosomal protein L32 OS=Leish     | 3  |

|             |          |            |                                                              |    |
|-------------|----------|------------|--------------------------------------------------------------|----|
| 4.956578109 | 4.057016 | E9AN73     | tr E9AN73 E9AN73_LEIMU Flagellar glycoprotein-like protein C | 7  |
| 4.596482978 | 4.056966 | E9AKH0     | tr E9AKH0 E9AKH0_LEIMU Uncharacterized protein OS=Leishn     | 2  |
| 4.75345573  | 4.052226 | E9AT76     | tr E9AT76 E9AT76_LEIMU Uncharacterized protein OS=Leishm     | 2  |
| 4.387369073 | 4.051739 | E9B2Z5     | tr E9B2Z5 E9B2Z5_LEIMU Uncharacterized protein OS=Leishm     | 8  |
| 6.09465134  | 4.050217 | E9AVE4     | tr E9AVE4 E9AVE4_LEIMU Uncharacterized protein OS=Leishr     | 2  |
| 4.73370078  | 4.048598 | E9AM37     | tr E9AM37 E9AM37_LEIMU Uncharacterized protein OS=Leish      | 2  |
| 4.983310632 | 4.048317 | E9AVH9     | tr E9AVH9 E9AVH9_LEIMU Proteasome subunit alpha type OS:     | 5  |
| 4.986786597 | 4.047498 | E9B047     | tr E9B047 E9B047_LEIMU Putative glycosomal membrane prof     | 2  |
| 4.690703614 | 4.046009 | E9AVH2     | tr E9AVH2 E9AVH2_LEIMU Centromere/microtubule binding p      | 9  |
| 5.197617017 | 4.045705 | E9B2W2     | tr E9B2W2 E9B2W2_LEIMU Chaperonin HSP60, mitochondrial,      | 2  |
| 5.163377702 | 4.045561 | E9APD3     | tr E9APD3 E9APD3_LEIMU Putative proteasome regulatory AT     | 6  |
| 5.187505924 | 4.045263 | E9APT8     | tr E9APT8 E9APT8_LEIMU Putative immunodominant antigen       | 7  |
| 4.871358184 | 4.045032 | E9AW70     | tr E9AW70 E9AW70_LEIMU Putative ubiquitin-activating enzy    | 6  |
| 5.425162267 | 4.043655 | E9AXZ5     | tr E9AXZ5 E9AXZ5_LEIMU Adenine phosphoribosyltransferase     | 2  |
| 4.890635239 | 4.038624 | E9AVG6     | tr E9AVG6 E9AVG6_LEIMU Proteasome subunit alpha type OS:     | 6  |
| 3.634691716 | 4.038263 | E9ATD6     | tr E9ATD6 E9ATD6_LEIMU Putative signal recognition particle  | 2  |
| 4.933781743 | 4.036706 | E9AYL9     | tr E9AYL9 E9AYL9_LEIMU Uncharacterized protein OS=Leishm;    | 5  |
| 4.770553917 | 4.036265 | E9AKY4;A7Y | tr E9AKY4 E9AKY4_LEIMU Protein disulfide isomerase OS=Leis   | 3  |
| 4.889999034 | 4.03326  | E9AZK7     | tr E9AZK7 E9AZK7_LEIMU Uncharacterized protein OS=Leishm     | 2  |
| 4.582392768 | 4.032574 | E9AUN1     | tr E9AUN1 E9AUN1_LEIMU Uncharacterized protein OS=Leish      | 20 |
| 4.838594684 | 4.03105  | E9B013     | tr E9B013 E9B013_LEIMU Uncharacterized protein OS=Leishm     | 5  |
| 4.893698772 | 4.030637 | E9B730     | tr E9B730 E9B730_LEIMU Polyadenylate-binding protein OS=L    | 17 |
| 4.712931047 | 4.027733 | E9B1C6     | tr E9B1C6 E9B1C6_LEIMU S-adenosylmethionine synthase OS=     | 12 |
| 4.775850208 | 4.027638 | E9B508     | tr E9B508 E9B508_LEIMU Uncharacterized protein OS=Leishm     | 2  |
| 4.957113337 | 4.027464 | E9AUL9     | tr E9AUL9 E9AUL9_LEIMU Putative vesicle-fusing ATPase OS=L   | 5  |
| 4.40873186  | 4.025496 | E9AQ80     | tr E9AQ80 E9AQ80_LEIMU Uncharacterized protein OS=Leishn     | 2  |
| 4.252820663 | 4.02401  | E9ATN0     | tr E9ATN0 E9ATN0_LEIMU Uncharacterized protein OS=Leishr     | 4  |
| 3.92947531  | 4.023628 | E9AZV0     | tr E9AZV0 E9AZV0_LEIMU Putative ATP-dependent RNA helica     | 2  |
| 4.676927208 | 4.023285 | E9B2U4     | tr E9B2U4 E9B2U4_LEIMU Uncharacterized protein OS=Leishr     | 2  |
| 3.958377889 | 4.022379 | E9AXB9     | tr E9AXB9 E9AXB9_LEIMU Uncharacterized protein OS=Leishr     | 2  |
| 4.400342763 | 4.020901 | E9AYN0     | tr E9AYN0 E9AYN0_LEIMU Uncharacterized protein OS=Leishr     | 2  |
| 5.624422001 | 4.02031  | E9ATB8     | tr E9ATB8 E9ATB8_LEIMU 60S ribosomal protein L29 OS=Leish    | 3  |
| 4.400857628 | 4.019273 | E9AJN6     | tr E9AJN6 E9AJN6_LEIMU Putative peptidyl dipeptidase OS=Le   | 3  |
| 4.505179443 | 4.018773 | E9AXH8     | tr E9AXH8 E9AXH8_LEIMU Uncharacterized protein OS=Leishn     | 3  |
| 4.709858785 | 4.018494 | E9AP50     | tr E9AP50 E9AP50_LEIMU Uncharacterized protein OS=Leishm     | 4  |
| 5.307965919 | 4.017132 | E9B3L1     | tr E9B3L1 E9B3L1_LEIMU Putative ATP-binding cassette protei  | 5  |
| 4.678499724 | 4.017121 | E9ANG1     | tr E9ANG1 E9ANG1_LEIMU Uncharacterized protein OS=Leishr     | 8  |
| 4.70292899  | 4.014951 | E9ANI7     | tr E9ANI7 E9ANI7_LEIMU Ribosome biogenesis protein BOP1 b    | 3  |
| 4.807780023 | 4.014874 | E9AT85     | tr E9AT85 E9AT85_LEIMU Fibrillarin OS=Leishmania mexicana    | 8  |
| 4.670576458 | 4.014721 | E9B193     | tr E9B193 E9B193_LEIMU 3-hydroxy-3-methylglutaryl coenzyn    | 5  |
| 4.755404785 | 4.007758 | E9ARW6     | tr E9ARW6 E9ARW6_LEIMU Uncharacterized protein OS=Leish      | 7  |
| 4.889733773 | 4.005431 | E9AQ10     | tr E9AQ10 E9AQ10_LEIMU Putative ATP-dependent RNA helica     | 4  |
| 5.102272722 | 4.004009 | E9B174     | tr E9B174 E9B174_LEIMU Putative Lsm5p OS=Leishmania mex      | 2  |
| 4.601970638 | 4.002697 | E9AS18     | tr E9AS18 E9AS18_LEIMU DNA-directed RNA polymerase, alph     | 5  |
| 4.497345129 | 4.001471 | E9B4Q3;E9E | tr E9B4Q3 E9B4Q3_LEIMU Elongation factor 1-beta OS=Leishr    | 6  |
| 4.802141554 | 3.997688 | E9B199     | tr E9B199 E9B199_LEIMU Putative glutamyl-tRNA synthetase (   | 8  |
| 5.416753352 | 3.997546 | E9B234     | tr E9B234 E9B234_LEIMU Putative p-nitrophenylphosphatase     | 3  |
| 4.493574839 | 3.996218 | E9B187     | tr E9B187 E9B187_LEIMU Putative valyl-tRNA synthetase OS=L   | 5  |
| 4.86021483  | 3.992205 | E9ARY4     | tr E9ARY4 E9ARY4_LEIMU Intraflagellar transport protein com  | 2  |
| 4.079459318 | 3.991401 | E9APD5     | tr E9APD5 E9APD5_LEIMU Uncharacterized protein OS=Leishr     | 2  |
| 4.529864819 | 3.991051 | E9ARQ8     | tr E9ARQ8 E9ARQ8_LEIMU Putative prolyl-tRNA synthetase OS    | 3  |
| 5.012026147 | 3.990458 | E9APD4;A0/ | tr E9APD4 E9APD4_LEIMU Putative leucyl-tRNA synthetase OS    | 12 |

|             |          |            |                                                              |    |
|-------------|----------|------------|--------------------------------------------------------------|----|
| 4.726764128 | 3.989556 | E9AV01     | tr E9AV01 E9AV01_LEIMU Mitochondrial processing peptidase    | 9  |
| 5.626806735 | 3.987444 | E9ANE2     | tr E9ANE2 E9ANE2_LEIMU Uncharacterized protein OS=Leishn     | 3  |
| 4.676479435 | 3.985146 | E9AV48     | tr E9AV48 E9AV48_LEIMU Uncharacterized protein OS=Leishn     | 21 |
| 5.240623681 | 3.983334 | E9B6L3;BOF | tr E9B6L3 E9B6L3_LEIMU 6-phosphogluconate dehydrogenase      | 7  |
| 4.831746009 | 3.982151 | E9ANZ0     | tr E9ANZ0 E9ANZ0_LEIMU Putative alanine aminotransferase (   | 4  |
| 4.350728718 | 3.982032 | E9AMI2     | tr E9AMI2 E9AMI2_LEIMU Uncharacterized protein OS=Leishn     | 2  |
| 4.444115686 | 3.981233 | E9AUS1     | tr E9AUS1 E9AUS1_LEIMU Putative calpain-like cysteine peptic | 3  |
| 4.740689401 | 3.980772 | E9AXT8     | tr E9AXT8 E9AXT8_LEIMU Uncharacterized protein OS=Leishm     | 2  |
| 5.027140901 | 3.98063  | E9B2K7     | tr E9B2K7 E9B2K7_LEIMU Uncharacterized protein OS=Leishm     | 2  |
| 5.03790636  | 3.97914  | E9AX44     | tr E9AX44 E9AX44_LEIMU Uncharacterized protein OS=Leishm     | 5  |
| 4.162154876 | 3.978292 | E9AY81     | tr E9AY81 E9AY81_LEIMU Putative dynein heavy chain OS=Leis   | 4  |
| 4.182461419 | 3.978062 | Q2PQD2;E9  | tr Q2PQD2 Q2PQD2_LEIME MPK10 OS=Leishmania mexicana (        | 2  |
| 4.228100185 | 3.975541 | E9AN97;Q9  | tr E9AN97 E9AN97_LEIMU Histone H3 OS=Leishmania mexicar      | 5  |
| 4.685315947 | 3.974966 | E9ANL6     | tr E9ANL6 E9ANL6_LEIMU Uncharacterized protein OS=Leishn     | 2  |
| 4.465814737 | 3.973782 | E9AU33     | tr E9AU33 E9AU33_LEIMU Uncharacterized protein OS=Leishn     | 4  |
| 4.061786278 | 3.97378  | E9ATG0     | tr E9ATG0 E9ATG0_LEIMU Uncharacterized protein OS=Leishn     | 5  |
| 4.636283176 | 3.973271 | E9APC3     | tr E9APC3 E9APC3_LEIMU Uncharacterized protein OS=Leishm     | 2  |
| 4.117002733 | 3.972381 | E9B4I2     | tr E9B4I2 E9B4I2_LEIMU Putative malate dehydrogenase OS=L    | 2  |
| 4.652002349 | 3.969245 | E9B4K6     | tr E9B4K6 E9B4K6_LEIMU Uncharacterized protein (Fragment)    | 3  |
| 5.786240359 | 3.967183 | E9B0Q7     | tr E9B0Q7 E9B0Q7_LEIMU Uncharacterized protein OS=Leishn     | 2  |
| 4.605712883 | 3.966057 | E9B700     | tr E9B700 E9B700_LEIMU Uncharacterized protein OS=Leishm     | 14 |
| 4.76005447  | 3.96283  | E9AVR1     | tr E9AVR1 E9AVR1_LEIMU Putative NADH-cytochrome b5 redu      | 7  |
| 4.858317368 | 3.962476 | E9B0G2     | tr E9B0G2 E9B0G2_LEIMU Putative phosphatase 2C OS=Leishn     | 3  |
| 4.654219832 | 3.961707 | E9B3W9     | tr E9B3W9 E9B3W9_LEIMU Cysteine conjugate beta-lyase,ami     | 4  |
| 4.669605624 | 3.961304 | E9AJT7     | tr E9AJT7 E9AJT7_LEIMU Putative 26S protease regulatory sub  | 4  |
| 4.296476408 | 3.960821 | E9AUB1     | tr E9AUB1 E9AUB1_LEIMU Uncharacterized protein OS=Leishn     | 5  |
| 4.692100299 | 3.960817 | E9ALK7     | tr E9ALK7 E9ALK7_LEIMU Rab GDP dissociation inhibitor OS=L   | 4  |
| 5.417887732 | 3.959734 | E9AU34     | tr E9AU34 E9AU34_LEIMU Uncharacterized protein OS=Leishn     | 3  |
| 4.446524132 | 3.952987 | E9B1B8     | tr E9B1B8 E9B1B8_LEIMU Uncharacterized protein OS=Leishm     | 6  |
| 5.284048531 | 3.95199  | E9B263     | tr E9B263 E9B263_LEIMU 2-oxoglutarate dehydrogenase, e3 c    | 2  |
| 4.299986401 | 3.951207 | E9AX02     | tr E9AX02 E9AX02_LEIMU Uncharacterized protein OS=Leishm     | 2  |
| 4.668990465 | 3.949835 | E9AQK4     | tr E9AQK4 E9AQK4_LEIMU Putative 60S ribosomal protein L21    | 7  |
| 4.555949811 | 3.948825 | E9B5Z7;E9B | tr E9B5Z7 E9B5Z7_LEIMU Putative NADH-dependent fumarate      | 7  |
| 5.62993991  | 3.946679 | E9AQS9     | tr E9AQS9 E9AQS9_LEIMU Coatomer subunit delta OS=Leishm      | 6  |
| 4.660579427 | 3.946393 | E8NHQ7;E9  | tr E8NHQ7 E8NHQ7_LEIMU Putative ATPase alpha subunit OS-     | 18 |
| 4.84962204  | 3.944696 | E9AZU7     | tr E9AZU7 E9AZU7_LEIMU Putative phenylalanine-4-hydroxyla    | 4  |
| 4.043133976 | 3.943151 | E9ARU5     | tr E9ARU5 E9ARU5_LEIMU Uncharacterized protein OS=Leishn     | 2  |
| 4.670788483 | 3.943065 | E9B3K3     | tr E9B3K3 E9B3K3_LEIMU Thiol-dependent reductase 1 OS=Le     | 3  |
| 3.946307604 | 3.942149 | E9AYL8     | tr E9AYL8 E9AYL8_LEIMU Uncharacterized protein OS=Leishm;    | 2  |
| 4.37954886  | 3.94161  | E9AYI1     | tr E9AYI1 E9AYI1_LEIMU Uncharacterized protein OS=Leishma    | 5  |
| 4.313329009 | 3.940532 | E9AQ55     | tr E9AQ55 E9AQ55_LEIMU Uncharacterized protein OS=Leishn     | 2  |
| 5.128451734 | 3.940353 | E9AVX3     | tr E9AVX3 E9AVX3_LEIMU Putative centrin (Ca2+-binding ef-h   | 5  |
| 4.716973459 | 3.93955  | E9ANV2     | tr E9ANV2 E9ANV2_LEIMU Putative cysteinyl-tRNA synthetase    | 9  |
| 4.628150454 | 3.938524 | E9AXE4     | tr E9AXE4 E9AXE4_LEIMU Putative epsin OS=Leishmania mexic    | 7  |
| 3.977019652 | 3.938249 | E9AWM2     | tr E9AWM2 E9AWM2_LEIMU Uncharacterized protein OS=Leis       | 3  |
| 4.65235109  | 3.938218 | E9AQJ5     | tr E9AQJ5 E9AQJ5_LEIMU Putative tubulin tyrosine ligase OS=L | 2  |
| 4.462781558 | 3.938128 | E9AVN0     | tr E9AVN0 E9AVN0_LEIMU Uncharacterized protein OS=Leishn     | 4  |
| 4.764605712 | 3.937897 | E9AZ89;A5J | tr E9AZ89 E9AZ89_LEIMU Putative trypanothione synthetase (   | 4  |
| 5.194446395 | 3.937004 | E9AMU9     | tr E9AMU9 E9AMU9_LEIMU Elongation factor-1 gamma OS=Le       | 8  |
| 4.44890903  | 3.935202 | E9AUN2     | tr E9AUN2 E9AUN2_LEIMU Uncharacterized protein OS=Leishn     | 3  |
| 4.523131232 | 3.933611 | E9AZG6     | tr E9AZG6 E9AZG6_LEIMU Uncharacterized protein OS=Leishn     | 3  |
| 4.556669151 | 3.932363 | E9B4S1;Q9  | tr E9B4S1 E9B4S1_LEIMU p-glycoprotein OS=Leishmania mexic    | 8  |



|             |          |             |                          |                                                                 |    |
|-------------|----------|-------------|--------------------------|-----------------------------------------------------------------|----|
| 4.967902548 | 3.931527 | E9B2A8      | tr E9B2A8 E9B2A8_LEIMU   | Putative peptidase OS=Leishmania                                | 4  |
| 4.891012062 | 3.931062 | E9AJE9      | tr E9AJE9 E9AJE9_LEIMU   | Uncharacterized protein OS=Leishmania                           | 2  |
| 5.122380456 | 3.927659 | E9ALL2      | tr E9ALL2 E9ALL2_LEIMU   | Uncharacterized protein OS=Leishmania                           | 7  |
| 5.573300408 | 3.9269   | E9B1W4;E9   | tr E9B1W4 E9B1W4_LEIMU   | Thiolase protein-like protein OS=Leishmania                     | 4  |
| 5.02297911  | 3.92323  | E9ASW6      | tr E9ASW6 E9ASW6_LEIMU   | Putative 60S ribosomal protein L3 OS=Leishmania                 | 2  |
| 4.907323211 | 3.921328 | E9B2F6      | tr E9B2F6 E9B2F6_LEIMU   | Uncharacterized protein OS=Leishmania                           | 8  |
| 5.443407694 | 3.920776 | E9B2A6;E9B  | tr E9B2A6 E9B2A6_LEIMU   | Iron/zinc transporter protein-like protein OS=Leishmania        | 2  |
| 5.383313596 | 3.920771 | E9B5J3      | tr E9B5J3 E9B5J3_LEIMU   | Nucleolar protein family a member-like OS=Leishmania            | 6  |
| 4.63349561  | 3.920763 | E9B6L7      | tr E9B6L7 E9B6L7_LEIMU   | Uncharacterized protein OS=Leishmania                           | 2  |
| 4.427422435 | 3.920558 | E9AMV9;E9A  | tr E9AMV9 E9AMV9_LEIMU   | Putative eukaryotic translation initiation factor OS=Leishmania | 9  |
| 4.913594447 | 3.919469 | E9AP62;E8M  | tr E9AP62 E9AP62_LEIMU   | Tubulin alpha chain OS=Leishmania                               | 37 |
| 4.639713357 | 3.918029 | E9AYB7      | tr E9AYB7 E9AYB7_LEIMU   | Prefoldin subunit 3 OS=Leishmania                               | 4  |
| 4.863929057 | 3.917586 | E9B0J8      | tr E9B0J8 E9B0J8_LEIMU   | GrpE protein homolog OS=Leishmania                              | 8  |
| 5.090409109 | 3.917311 | E9B0S3      | tr E9B0S3 E9B0S3_LEIMU   | Putative kinesin OS=Leishmania mexicana                         | 3  |
| 4.292940114 | 3.916954 | E9ALV8;A5J  | tr E9ALV8 E9ALV8_LEIMU   | Putative trypanothione synthase OS=Leishmania                   | 3  |
| 4.956841907 | 3.916562 | E9AWB3      | tr E9AWB3 E9AWB3_LEIMU   | Uncharacterized protein OS=Leishmania                           | 4  |
| 4.585547344 | 3.914568 | E9AK81      | tr E9AK81 E9AK81_LEIMU   | Uncharacterized protein OS=Leishmania                           | 14 |
| 5.128911307 | 3.914    | E9AX08      | tr E9AX08 E9AX08_LEIMU   | Succinate dehydrogenase [ubiquinol oxidase] OS=Leishmania       | 12 |
| 4.627200129 | 3.91282  | E9AV44      | tr E9AV44 E9AV44_LEIMU   | Proteasome regulatory non-ATP-ase OS=Leishmania                 | 3  |
| 4.224711401 | 3.912214 | E9B5M9      | tr E9B5M9 E9B5M9_LEIMU   | Proteasome subunit beta OS=Leishmania                           | 2  |
| 4.518307273 | 3.910712 | E9AR16      | tr E9AR16 E9AR16_LEIMU   | Uncharacterized protein OS=Leishmania                           | 4  |
| 4.931298699 | 3.90814  | E9AZB9      | tr E9AZB9 E9AZB9_LEIMU   | Uncharacterized protein OS=Leishmania                           | 3  |
| 4.246881398 | 3.902327 | E9AU28      | tr E9AU28 E9AU28_LEIMU   | Uncharacterized protein OS=Leishmania                           | 2  |
| 5.468888867 | 3.899726 | E9AJM8      | tr E9AJM8 E9AJM8_LEIMU   | Uncharacterized protein OS=Leishmania                           | 5  |
| 4.73889497  | 3.899369 | E9ALE4      | tr E9ALE4 E9ALE4_LEIMU   | Uncharacterized protein OS=Leishmania                           | 4  |
| 3.92518319  | 3.897258 | E9AJD5      | tr E9AJD5 E9AJD5_LEIMU   | Beta eliminating lyase, putative OS=Leishmania                  | 3  |
| 5.009105205 | 3.896212 | E9B493      | tr E9B493 E9B493_LEIMU   | Putative carboxypeptidase OS=Leishmania                         | 10 |
| 4.716195268 | 3.892809 | E9AWW4      | tr E9AWW4 E9AWW4_LEIMU   | Uncharacterized protein OS=Leishmania                           | 2  |
| 4.980978701 | 3.892804 | Q6TUIJ5;E9B | tr Q6TUIJ5 Q6TUIJ5_LEIMU | Arginase OS=Leishmania mexicana                                 | 8  |
| 4.460759924 | 3.89241  | E9B6Q7      | tr E9B6Q7 E9B6Q7_LEIMU   | Putative 60S ribosomal protein L23 OS=Leishmania                | 7  |
| 4.503330089 | 3.892346 | E9B344      | tr E9B344 E9B344_LEIMU   | Uncharacterized protein OS=Leishmania                           | 2  |
| 4.651049873 | 3.890501 | E9AVA9      | tr E9AVA9 E9AVA9_LEIMU   | Putative adenylate kinase OS=Leishmania                         | 7  |
| 4.485278858 | 3.888812 | E9ARD8      | tr E9ARD8 E9ARD8_LEIMU   | Uncharacterized protein OS=Leishmania                           | 8  |
| 4.848945817 | 3.888259 | E9AXZ8;E9A  | tr E9AXZ8 E9AXZ8_LEIMU   | Putative 60S ribosomal protein L7 OS=Leishmania                 | 12 |
| 4.369777384 | 3.887773 | E9AXG0      | tr E9AXG0 E9AXG0_LEIMU   | Prefoldin subunit 4 OS=Leishmania                               | 3  |
| 3.199316218 | 3.887572 | E9AZG5      | tr E9AZG5 E9AZG5_LEIMU   | Uncharacterized protein OS=Leishmania                           | 3  |
| 4.024647444 | 3.887023 | E9AYE2      | tr E9AYE2 E9AYE2_LEIMU   | Putative 40S ribosomal protein S33 OS=Leishmania                | 3  |
| 5.364636773 | 3.886075 | E9ANQ5      | tr E9ANQ5 E9ANQ5_LEIMU   | Uncharacterized protein OS=Leishmania                           | 7  |
| 5.218374543 | 3.884272 | E9AZ50      | tr E9AZ50 E9AZ50_LEIMU   | Uncharacterized protein OS=Leishmania                           | 4  |
| 4.69937929  | 3.88305  | E9ASH6;O0   | tr E9ASH6 E9ASH6_LEIMU   | Elongation factor G, mitochondrial OS=Leishmania                | 6  |
| 3.58643992  | 3.88177  | E9AS31      | tr E9AS31 E9AS31_LEIMU   | Putative signal recognition particle protein OS=Leishmania      | 2  |
| 4.89415085  | 3.880177 | E9AMS8;A7   | tr E9AMS8 E9AMS8_LEIMU   | Oligopeptidase b OS=Leishmania                                  | 5  |
| 5.095203346 | 3.879864 | E9B669;E9A  | tr E9B669 E9B669_LEIMU   | Putative 60S Ribosomal protein L36 OS=Leishmania                | 7  |
| 4.765305154 | 3.879016 | E9ANQ3;C7   | tr E9ANQ3 E9ANQ3_LEIMU   | Putative lanosterol 14-alpha-demethylase OS=Leishmania          | 5  |
| 4.871576804 | 3.878402 | E9B182      | tr E9B182 E9B182_LEIMU   | Putative homoserine kinase OS=Leishmania                        | 2  |
| 4.683426067 | 3.876645 | E9ATZ6      | tr E9ATZ6 E9ATZ6_LEIMU   | Putative isoleucyl-tRNA synthetase OS=Leishmania                | 11 |
| 4.823385379 | 3.875745 | E9ATW8      | tr E9ATW8 E9ATW8_LEIMU   | Uncharacterized protein OS=Leishmania                           | 6  |
| 5.376248752 | 3.875367 | E9B5H9      | tr E9B5H9 E9B5H9_LEIMU   | Small nuclear ribonucleoprotein Sm D2 OS=Leishmania             | 2  |
| 5.658149395 | 3.875222 | E9B1S0      | tr E9B1S0 E9B1S0_LEIMU   | Putative vacuolar-type proton translocator OS=Leishmania        | 5  |
| 4.543315972 | 3.873174 | E9AYP1      | tr E9AYP1 E9AYP1_LEIMU   | Uncharacterized protein OS=Leishmania                           | 2  |
| 4.821142152 | 3.872102 | E9ATG6      | tr E9ATG6 E9ATG6_LEIMU   | Putative glycyl tRNA synthetase OS=Leishmania                   | 13 |
| 4.883172781 | 3.866894 | E9ATA7      | tr E9ATA7 E9ATA7_LEIMU   | Uncharacterized protein OS=Leishmania                           | 7  |

|             |          |            |                        |                                        |    |
|-------------|----------|------------|------------------------|----------------------------------------|----|
| 4.214783696 | 3.865961 | E9AKR1     | tr E9AKR1 E9AKR1_LEIMU | Uncharacterized protein OS=Leishr      | 3  |
| 5.193676496 | 3.864197 | E9AZT2     | tr E9AZT2 E9AZT2_LEIMU | Putative electron-transfer-flavoprot   | 5  |
| 4.909963991 | 3.863464 | E9ASV1     | tr E9ASV1 E9ASV1_LEIMU | Putative exoribonuclease 2 OS=Leisl    | 4  |
| 5.069589328 | 3.862456 | E9B369     | tr E9B369 E9B369_LEIMU | Uncharacterized protein OS=Leishm      | 2  |
| 5.428228031 | 3.86187  | E9B529     | tr E9B529 E9B529_LEIMU | DNAJ-like protein OS=Leishmania m      | 3  |
| 5.486811014 | 3.853285 | E9ANY1;P42 | tr E9ANY1 E9ANY1_LEIMU | Glucose-6-phosphate isomerase OS       | 7  |
| 4.521837235 | 3.85004  | E9B0V2     | tr E9B0V2 E9B0V2_LEIMU | Putative queuine tRNA-ribosyltransf    | 6  |
| 4.752892023 | 3.844936 | E9AUD5     | tr E9AUD5 E9AUD5_LEIMU | Putative eukaryotic translation init   | 15 |
| 3.815342284 | 3.843708 | E9AMV0     | tr E9AMV0 E9AMV0_LEIMU | Uncharacterized protein OS=Leish       | 2  |
| 4.909690159 | 3.839574 | E9B466     | tr E9B466 E9B466_LEIMU | Uncharacterized protein OS=Leishm      | 4  |
| 4.787975359 | 3.835709 | E9AY41     | tr E9AY41 E9AY41_LEIMU | Putative 10 kDa heat shock protein (   | 4  |
| 4.90445252  | 3.833887 | E9AW08     | tr E9AW08 E9AW08_LEIMU | Uncharacterized protein OS=Leish       | 14 |
| 5.013963341 | 3.828831 | E9AST0     | tr E9AST0 E9AST0_LEIMU | Uncharacterized protein OS=Leishm      | 2  |
| 5.831141867 | 3.828497 | E9AU45     | tr E9AU45 E9AU45_LEIMU | Uncharacterized protein OS=Leishn      | 2  |
| 5.376776152 | 3.827591 | E9B2X2     | tr E9B2X2 E9B2X2_LEIMU | Putative heat shock protein-like pro   | 3  |
| 4.709354481 | 3.827513 | E9AYA9     | tr E9AYA9 E9AYA9_LEIMU | Uncharacterized protein OS=Leishr      | 25 |
| 5.331035569 | 3.826853 | E9B6R2     | tr E9B6R2 E9B6R2_LEIMU | Proteasome subunit beta OS=Leishr      | 3  |
| 4.682329918 | 3.825996 | E9AKW5     | tr E9AKW5 E9AKW5_LEIMU | Uncharacterized protein OS=Leish       | 2  |
| 4.974610326 | 3.824035 | E9AX53     | tr E9AX53 E9AX53_LEIMU | 40S ribosomal protein S8 OS=Leishn     | 9  |
| 4.735486738 | 3.822934 | E9B5S5     | tr E9B5S5 E9B5S5_LEIMU | Putative ATP-dependent DEAD-box f      | 7  |
| 5.606007653 | 3.82283  | E9B2X1     | tr E9B2X1 E9B2X1_LEIMU | Uncharacterized protein OS=Leishm      | 8  |
| 4.713408867 | 3.819468 | E9AY83     | tr E9AY83 E9AY83_LEIMU | Uncharacterized protein OS=Leishm      | 3  |
| 5.271683271 | 3.816902 | E9B492     | tr E9B492 E9B492_LEIMU | Uncharacterized protein OS=Leishm      | 3  |
| 4.124295033 | 3.816831 | E9ATF1     | tr E9ATF1 E9ATF1_LEIMU | Uncharacterized protein OS=Leishm      | 2  |
| 5.280180465 | 3.815642 | E9ANY7     | tr E9ANY7 E9ANY7_LEIMU | Uncharacterized protein OS=Leishr      | 3  |
| 4.855065714 | 3.814173 | E9AXD9     | tr E9AXD9 E9AXD9_LEIMU | DNA-directed RNA polymerase subu       | 2  |
| 5.016493803 | 3.813162 | E9ASE2     | tr E9ASE2 E9ASE2_LEIMU | eIF3-interacting protein-like protein  | 9  |
| 5.160863567 | 3.810977 | E9ATK7     | tr E9ATK7 E9ATK7_LEIMU | Uncharacterized protein OS=Leishm      | 11 |
| 5.216014079 | 3.807854 | E9B038     | tr E9B038 E9B038_LEIMU | Uncharacterized protein OS=Leishm      | 12 |
| 4.65191377  | 3.805648 | Q4TZP6;E9A | tr Q4TZP6 Q4TZP6_LEIME | Glutamine synthetase OS=Leishman       | 10 |
| 4.627431069 | 3.798865 | E9AYD4     | tr E9AYD4 E9AYD4_LEIMU | Trifunctional enzyme alpha subunit     | 2  |
| 4.414040713 | 3.797199 | E9B705     | tr E9B705 E9B705_LEIMU | Putative peptidyl-prolyl cis-trans iso | 4  |
| 5.142874331 | 3.791908 | E9AMD6     | tr E9AMD6 E9AMD6_LEIMU | Uncharacterized protein OS=Leish       | 4  |
| 5.478257066 | 3.789674 | E9B3U9     | tr E9B3U9 E9B3U9_LEIMU | Putative pumilio protein OS=Leishr     | 11 |
| 5.467000047 | 3.787272 | E9AWH9     | tr E9AWH9 E9AWH9_LEIMU | Uncharacterized protein OS=Leish       | 5  |
| 5.913568164 | 3.787107 | E9AUL2     | tr E9AUL2 E9AUL2_LEIMU | Uncharacterized protein OS=Leishr      | 2  |
| 5.2765197   | 3.78671  | E9B645     | tr E9B645 E9B645_LEIMU | Putative 60S ribosomal protein L26 (   | 2  |
| 5.062264082 | 3.785912 | E9B677     | tr E9B677 E9B677_LEIMU | Uncharacterized protein OS=Leishm      | 6  |
| 6.039656275 | 3.785133 | E9ANB6     | tr E9ANB6 E9ANB6_LEIMU | Uncharacterized protein OS=Leishr      | 2  |
| 5.195603964 | 3.782846 | E9B0D7     | tr E9B0D7 E9B0D7_LEIMU | Alkyl dihydroxyacetonephosphate s      | 6  |
| 5.362972141 | 3.782113 | E9B1P8     | tr E9B1P8 E9B1P8_LEIMU | Uncharacterized protein OS=Leishm      | 6  |
| 5.31093676  | 3.781922 | E9AV22     | tr E9AV22 E9AV22_LEIMU | Dihydrolipoamide acetyltransferase     | 3  |
| 4.683742298 | 3.781487 | E9ALS3;E8N | tr E9ALS3 E9ALS3_LEIMU | Uncharacterized protein OS=Leishm      | 3  |
| 3.917529633 | 3.779873 | E9ASD1     | tr E9ASD1 E9ASD1_LEIMU | Uncharacterized protein OS=Leishr      | 2  |
| 5.230279193 | 3.779117 | E9AXJ1     | tr E9AXJ1 E9AXJ1_LEIMU | Aldehyde dehydrogenase, mitochon       | 10 |
| 5.186484636 | 3.778769 | E9ATB0     | tr E9ATB0 E9ATB0_LEIMU | Putative actin-like protein OS=Leish   | 2  |
| 4.266080818 | 3.772958 | E9AT88     | tr E9AT88 E9AT88_LEIMU | Putative ATP synthase OS=Leishmar      | 3  |
| 4.349505119 | 3.770957 | E9APZ6     | tr E9APZ6 E9APZ6_LEIMU | Putative glutathione-S-transferase/g   | 3  |
| 4.186255925 | 3.770187 | E9AWA7;Q5  | tr E9AWA7 E9AWA7_LEIMU | Cytosolic leucyl aminopeptidase (      | 3  |
| 5.054674829 | 3.769315 | E9AZ84     | tr E9AZ84 E9AZ84_LEIMU | Uncharacterized protein OS=Leishm      | 8  |
| 4.909657775 | 3.765752 | E9AYZ5     | tr E9AYZ5 E9AYZ5_LEIMU | Putative isovaleryl-coA dehydrogen     | 5  |
| 5.347010472 | 3.765585 | E9APB1     | tr E9APB1 E9APB1_LEIMU | Mitochondrial processing peptidase     | 8  |

|             |          |            |                        |                                        |    |
|-------------|----------|------------|------------------------|----------------------------------------|----|
| 4.852606994 | 3.761787 | E9B052     | tr E9B052 E9B052_LEIMU | Eukaryotic translation initiation fact | 5  |
| 5.187535683 | 3.758348 | E9AJW8     | tr E9AJW8 E9AJW8_LEIMU | Uncharacterized protein OS=Leishr      | 7  |
| 4.445292919 | 3.757989 | E9B1R9     | tr E9B1R9 E9B1R9_LEIMU | Uncharacterized protein OS=Leishm      | 3  |
| 5.02438489  | 3.752437 | E9ASA6     | tr E9ASA6 E9ASA6_LEIMU | Peptidylprolyl isomerase OS=Leishr     | 7  |
| 4.737837571 | 3.747609 | E9AY61     | tr E9AY61 E9AY61_LEIMU | Putative asparagine synthetase a (P    | 7  |
| 4.595286249 | 3.747593 | E9B2E4     | tr E9B2E4 E9B2E4_LEIMU | Dynein light chain OS=Leishmania m     | 2  |
| 5.174313006 | 3.747526 | E9B1B6     | tr E9B1B6 E9B1B6_LEIMU | Uncharacterized protein OS=Leishm      | 3  |
| 4.673036841 | 3.747321 | E9B398     | tr E9B398 E9B398_LEIMU | Uncharacterized protein OS=Leishm      | 3  |
| 5.350600414 | 3.74562  | E9AZ25     | tr E9AZ25 E9AZ25_LEIMU | Uncharacterized protein OS=Leishm      | 9  |
| 5.066229449 | 3.741154 | E9AQN5     | tr E9AQN5 E9AQN5_LEIMU | Transaldolase OS=Leishmania mex        | 5  |
| 4.628716377 | 3.738142 | E9APD0     | tr E9APD0 E9APD0_LEIMU | NADH-cytochrome b5 reductase OS        | 2  |
| 4.220376605 | 3.737502 | E9B5K8     | tr E9B5K8 E9B5K8_LEIMU | Uncharacterized protein OS=Leishm      | 2  |
| 4.232713807 | 3.734085 | E9B5Z2;E9B | tr E9B5Z2 E9B5Z2_LEIMU | Oligosaccharyl transferase-like prote  | 3  |
| 5.139846361 | 3.73182  | E9ATK1;A1Y | tr E9ATK1 E9ATK1_LEIMU | Putative oxidoreductase OS=Leishm      | 7  |
| 5.1475509   | 3.731137 | E9ASF6     | tr E9ASF6 E9ASF6_LEIMU | Uncharacterized protein OS=Leishm      | 4  |
| 4.551478459 | 3.730113 | E9AQ99;E9E | tr E9AQ99 E9AQ99_LEIMU | 60S ribosomal protein L6 OS=Leishi     | 11 |
| 4.327356438 | 3.730058 | E9AZH2     | tr E9AZH2 E9AZH2_LEIMU | Proteasome subunit beta OS=Leishi      | 2  |
| 4.360806291 | 3.726575 | E9AP69     | tr E9AP69 E9AP69_LEIMU | Uncharacterized protein OS=Leishm      | 6  |
| 4.710356855 | 3.716446 | E9B560     | tr E9B560 E9B560_LEIMU | Uncharacterized protein OS=Leishm      | 5  |
| 4.760334672 | 3.716432 | E9ATU7     | tr E9ATU7 E9ATU7_LEIMU | Uncharacterized protein OS=Leishr      | 2  |
| 4.355595603 | 3.712297 | E9AWL7     | tr E9AWL7 E9AWL7_LEIMU | Dynein intermediate-chain-like pro     | 3  |
| 4.317574752 | 3.709748 | E9AZY4     | tr E9AZY4 E9AZY4_LEIMU | Uncharacterized protein OS=Leishm      | 2  |
| 4.21817367  | 3.708354 | E9AZZ2     | tr E9AZZ2 E9AZZ2_LEIMU | Proteasome regulatory non-ATP-ase      | 5  |
| 4.7549718   | 3.70811  | E9API2     | tr E9API2 E9API2_LEIMU | Ubiquitin-conjugating enzyme-like pr   | 3  |
| 4.994148144 | 3.707471 | E9AVK4     | tr E9AVK4 E9AVK4_LEIMU | Uncharacterized protein OS=Leishr      | 20 |
| 4.150714501 | 3.70615  | E9B158     | tr E9B158 E9B158_LEIMU | Uncharacterized protein OS=Leishm      | 2  |
| 4.717634973 | 3.705839 | O61059;E9A | tr O61059 O61059_LEIME | Glucose transporter OS=Leishmania      | 5  |
| 4.221294773 | 3.700783 | E9AZB6     | tr E9AZB6 E9AZB6_LEIMU | Putative RNA-binding protein OS=Le     | 6  |
| 5.80616239  | 3.694184 | E9B485     | tr E9B485 E9B485_LEIMU | Uncharacterized protein OS=Leishm      | 6  |
| 4.7090433   | 3.693969 | E9B1M1     | tr E9B1M1 E9B1M1_LEIMU | Putative ATP-dependent zinc meta       | 2  |
| 5.455264927 | 3.693897 | E9AQY7     | tr E9AQY7 E9AQY7_LEIMU | Uncharacterized protein OS=Leishn      | 3  |
| 6.066195919 | 3.688719 | E9AKI9     | tr E9AKI9 E9AKI9_LEIMU | S-methyl-5-thioadenosine phosphory     | 2  |
| 5.305382223 | 3.687896 | E9B760     | tr E9B760 E9B760_LEIMU | Uncharacterized protein OS=Leishm      | 6  |
| 5.003351468 | 3.687547 | E9B0V4     | tr E9B0V4 E9B0V4_LEIMU | Putative splicing factor 3a OS=Leish   | 3  |
| 4.703562696 | 3.687438 | E9ASZ0     | tr E9ASZ0 E9ASZ0_LEIMU | Putative DEAD box RNA helicase OS-     | 7  |
| 4.770750083 | 3.687358 | E9AJT5     | tr E9AJT5 E9AJT5_LEIMU | Uncharacterized protein OS=Leishma     | 5  |
| 4.708251541 | 3.677104 | E9AK26     | tr E9AK26 E9AK26_LEIMU | Putative calpain-like cysteine peptic  | 5  |
| 4.906835243 | 3.668107 | E9AXX5     | tr E9AXX5 E9AXX5_LEIMU | Uncharacterized protein OS=Leishm      | 7  |
| 5.352997054 | 3.664499 | E9ANQ6     | tr E9ANQ6 E9ANQ6_LEIMU | Putative eukaryotic release factor     | 7  |
| 5.356544105 | 3.663555 | E9AXX0     | tr E9AXX0 E9AXX0_LEIMU | Uncharacterized protein OS=Leishm      | 3  |
| 5.22652991  | 3.661301 | E9AV10     | tr E9AV10 E9AV10_LEIMU | Uncharacterized protein OS=Leishr      | 8  |
| 4.757038173 | 3.659657 | E9AXH4     | tr E9AXH4 E9AXH4_LEIMU | Tubulin gamma chain OS=Leishmar        | 3  |
| 3.744200089 | 3.658121 | E9AZB2     | tr E9AZB2 E9AZB2_LEIMU | Uncharacterized protein OS=Leishm      | 2  |
| 5.804905186 | 3.657656 | E9B2F8     | tr E9B2F8 E9B2F8_LEIMU | Protein SEY1 homolog OS=Leishman       | 2  |
| 4.81776419  | 3.656165 | E9B6B5     | tr E9B6B5 E9B6B5_LEIMU | Putative aminopeptidase P OS=Leisl     | 3  |
| 5.125976108 | 3.653711 | E9AYX8     | tr E9AYX8 E9AYX8_LEIMU | Putative small GTP-binding protein I   | 5  |
| 5.075823132 | 3.649798 | E9B5U7     | tr E9B5U7 E9B5U7_LEIMU | Uncharacterized protein OS=Leishr      | 8  |
| 5.273715687 | 3.649065 | E9B4C7     | tr E9B4C7 E9B4C7_LEIMU | Uncharacterized protein OS=Leishm      | 6  |
| 4.505134972 | 3.647882 | E9ANM5     | tr E9ANM5 E9ANM5_LEIMU | Uncharacterized protein OS=Leisl       | 7  |
| 5.142493021 | 3.646413 | E9B759     | tr E9B759 E9B759_LEIMU | Putative isomerase (Isopentenyl-dip    | 4  |
| 4.472858974 | 3.644298 | E9B378     | tr E9B378 E9B378_LEIMU | Tubulin-specific chaperone A OS=Le     | 2  |
| 5.26387181  | 3.643989 | E9AX67     | tr E9AX67 E9AX67_LEIMU | Putative 60S ribosomal protein L12     | 2  |

|             |          |            |                                                              |    |
|-------------|----------|------------|--------------------------------------------------------------|----|
| 5.034982913 | 3.640759 | E9AL86     | tr E9AL86 E9AL86_LEIMU Uncharacterized protein OS=Leishm     | 2  |
| 5.477420858 | 3.640547 | E9AVJ1     | tr E9AVJ1 E9AVJ1_LEIMU Transcription factor-like protein OS= | 2  |
| 4.908755457 | 3.637644 | E9AP81     | tr E9AP81 E9AP81_LEIMU 40S ribosomal protein S12 OS=Leish    | 7  |
| 5.22648906  | 3.63747  | Q71PB4;E9E | tr Q71PB4 Q71PB4_LEIME Broad specificity aminotransferase    | 6  |
| 4.434726476 | 3.637227 | E9AP97     | tr E9AP97 E9AP97_LEIMU Ubiquitin-like protein OS=Leishman    | 2  |
| 4.672656223 | 3.63648  | E9B2J9     | tr E9B2J9 E9B2J9_LEIMU Putative RNA binding protein OS=Lei   | 11 |
| 3.258747708 | 3.636145 | E9B6C8     | tr E9B6C8 E9B6C8_LEIMU Uncharacterized protein OS=Leishm     | 2  |
| 6.244127931 | 3.636123 | E9AT66     | tr E9AT66 E9AT66_LEIMU Uncharacterized protein OS=Leishm     | 2  |
| 4.972684214 | 3.635275 | E9AUK0     | tr E9AUK0 E9AUK0_LEIMU CTP synthase OS=Leishmania mexic      | 5  |
| 5.14026192  | 3.634692 | E9AWS4     | tr E9AWS4 E9AWS4_LEIMU Uncharacterized protein OS=Leish      | 2  |
| 5.156170011 | 3.634431 | E9AU86     | tr E9AU86 E9AU86_LEIMU Uncharacterized protein OS=Leishn     | 2  |
| 4.557155864 | 3.63356  | E9B2S6     | tr E9B2S6 E9B2S6_LEIMU Putative ATP-dependent zinc metall    | 3  |
| 4.605031963 | 3.630113 | E9B414     | tr E9B414 E9B414_LEIMU Uncharacterized protein OS=Leishm     | 8  |
| 5.272922232 | 3.630087 | E9AJL7     | tr E9AJL7 E9AJL7_LEIMU Uncharacterized protein OS=Leishma    | 3  |
| 4.825481183 | 3.628848 | E9ASP5;E9A | tr E9ASP5 E9ASP5_LEIMU Putative 40S ribosomal protein S9 O   | 7  |
| 4.61714563  | 3.625839 | E9B1S3     | tr E9B1S3 E9B1S3_LEIMU Uncharacterized protein OS=Leishm     | 2  |
| 4.839127111 | 3.624257 | E9B520     | tr E9B520 E9B520_LEIMU Putative asparaginyl-tRNA synthetas   | 9  |
| 4.771993721 | 3.620057 | E9AXI9     | tr E9AXI9 E9AXI9_LEIMU DNAj-like protein OS=Leishmania me    | 3  |
| 4.567514656 | 3.616625 | E9AJR2     | tr E9AJR2 E9AJR2_LEIMU Uncharacterized protein OS=Leishma    | 3  |
| 5.052224472 | 3.616265 | E9AJR0     | tr E9AJR0 E9AJR0_LEIMU Putative ribosomal protein L38 OS=L   | 5  |
| 4.334160153 | 3.614684 | E9APH2     | tr E9APH2 E9APH2_LEIMU Putative Ran-binding protein 1 OS=    | 2  |
| 5.044403028 | 3.613212 | E9B1Z2     | tr E9B1Z2 E9B1Z2_LEIMU Putative dihydrouridine synthase (D   | 2  |
| 5.401927271 | 3.611268 | E9B074     | tr E9B074 E9B074_LEIMU Uncharacterized protein OS=Leishm     | 2  |
| 5.110947323 | 3.606343 | E9AXK0     | tr E9AXK0 E9AXK0_LEIMU Uncharacterized protein OS=Leishm     | 6  |
| 4.364270677 | 3.60369  | E9AMU6     | tr E9AMU6 E9AMU6_LEIMU Uncharacterized protein OS=Leish      | 5  |
| 4.701672593 | 3.602744 | E9B6Z9     | tr E9B6Z9 E9B6Z9_LEIMU Putative MCAK-like kinesin OS=Leish   | 5  |
| 4.773901248 | 3.601375 | E9AQ77     | tr E9AQ77 E9AQ77_LEIMU Uncharacterized protein OS=Leishn     | 13 |
| 4.244302912 | 3.599925 | E9AQL2;Q9I | tr E9AQL2 E9AQL2_LEIMU Putative aspartate carbamoyltransf    | 4  |
| 4.449026241 | 3.599174 | E9AVT1     | tr E9AVT1 E9AVT1_LEIMU Uncharacterized protein OS=Leishm     | 3  |
| 4.909774469 | 3.598224 | E9AKL5;E8N | tr E9AKL5 E9AKL5_LEIMU Uncharacterized protein OS=Leishm     | 5  |
| 5.163511464 | 3.594256 | E9ALV6     | tr E9ALV6 E9ALV6_LEIMU Uncharacterized protein OS=Leishm     | 2  |
| 4.650251526 | 3.591768 | E9B5X8;E9B | tr E9B5X8 E9B5X8_LEIMU Aldose 1-epimerase-like protein OS=   | 3  |
| 4.898273507 | 3.583246 | E9AL83     | tr E9AL83 E9AL83_LEIMU Topoisomerase-related function pro    | 4  |
| 4.861057088 | 3.58257  | E9B2V9;E9E | tr E9B2V9 E9B2V9_LEIMU Superoxide dismutase OS=Leishmar      | 3  |
| 5.545995881 | 3.577925 | E9ATL1     | tr E9ATL1 E9ATL1_LEIMU Uncharacterized protein OS=Leishm     | 5  |
| 4.831825154 | 3.57511  | E9AX62     | tr E9AX62 E9AX62_LEIMU Uncharacterized protein OS=Leishm     | 4  |
| 4.874282896 | 3.574859 | E9AT87     | tr E9AT87 E9AT87_LEIMU Uncharacterized protein OS=Leishm     | 3  |
| 3.785548924 | 3.572887 | E9AY79     | tr E9AY79 E9AY79_LEIMU Uncharacterized protein OS=Leishm     | 2  |
| 4.826358686 | 3.570502 | E9B2Z9     | tr E9B2Z9 E9B2Z9_LEIMU Uncharacterized protein OS=Leishm     | 5  |
| 5.282931007 | 3.570046 | E9B6Z2     | tr E9B6Z2 E9B6Z2_LEIMU Uncharacterized protein OS=Leishm     | 3  |
| 5.828944639 | 3.5667   | E9ALH0     | tr E9ALH0 E9ALH0_LEIMU Uncharacterized protein OS=Leishm     | 5  |
| 5.081562348 | 3.564918 | E9APM4     | tr E9APM4 E9APM4_LEIMU Proteasome subunit alpha type OS      | 3  |
| 4.031736989 | 3.560864 | E9B2V2     | tr E9B2V2 E9B2V2_LEIMU Uncharacterized protein OS=Leishm     | 2  |
| 5.23121764  | 3.560352 | E9ATU0     | tr E9ATU0 E9ATU0_LEIMU Uncharacterized protein OS=Leishn     | 4  |
| 4.203208028 | 3.559825 | E9B1A1     | tr E9B1A1 E9B1A1_LEIMU Uncharacterized protein OS=Leishm     | 2  |
| 4.443358211 | 3.559701 | E9AWF1     | tr E9AWF1 E9AWF1_LEIMU Putative dynein heavy chain OS=L      | 4  |
| 4.830204209 | 3.556686 | E9AQH1     | tr E9AQH1 E9AQH1_LEIMU Eukaryotic translation initiation fac | 5  |
| 4.865465824 | 3.556137 | E9B5P8     | tr E9B5P8 E9B5P8_LEIMU Uncharacterized protein OS=Leishm     | 4  |
| 4.745169851 | 3.549092 | E9B0U8     | tr E9B0U8 E9B0U8_LEIMU Uncharacterized protein OS=Leishn     | 2  |
| 4.963973353 | 3.548466 | E9ARZ1     | tr E9ARZ1 E9ARZ1_LEIMU Putative 40S ribosomal protein S13    | 8  |
| 3.996728476 | 3.546169 | E9B357     | tr E9B357 E9B357_LEIMU Uncharacterized protein OS=Leishm     | 2  |
| 4.553327808 | 3.542215 | E9ASM6     | tr E9ASM6 E9ASM6_LEIMU Uncharacterized protein OS=Leishi     | 5  |

|             |          |            |                                                             |    |
|-------------|----------|------------|-------------------------------------------------------------|----|
| 5.088928276 | 3.534271 | E9AQ94     | tr E9AQ94 E9AQ94_LEIMU Putative 40S ribosomal protein S3 (  | 5  |
| 4.820166185 | 3.533384 | E9AZ67     | tr E9AZ67 E9AZ67_LEIMU Uncharacterized protein OS=Leishm    | 4  |
| 5.214424821 | 3.533139 | E9AMB1     | tr E9AMB1 E9AMB1_LEIMU Putative mitochondrial associated    | 3  |
| 4.607424625 | 3.528509 | E9AJV8     | tr E9AJV8 E9AJV8_LEIMU Uncharacterized protein OS=Leishm:   | 3  |
| 4.772899272 | 3.522369 | E9AMX3     | tr E9AMX3 E9AMX3_LEIMU Putative AAA family ATPase OS=Le     | 4  |
| 4.7739801   | 3.515034 | E9AKM1     | tr E9AKM1 E9AKM1_LEIMU V-type proton ATPase subunit OS=     | 2  |
| 5.146598093 | 3.514084 | E9AVN9     | tr E9AVN9 E9AVN9_LEIMU Putative proteasome regulatory AT    | 2  |
| 4.582753689 | 3.507886 | E9AQX4     | tr E9AQX4 E9AQX4_LEIMU Putative prohibitin OS=Leishmania    | 3  |
| 4.741596337 | 3.50737  | E9AMC2     | tr E9AMC2 E9AMC2_LEIMU Uncharacterized protein OS=Leish     | 7  |
| 4.644757428 | 3.505534 | E9ANG0     | tr E9ANG0 E9ANG0_LEIMU Uncharacterized protein OS=Leishr    | 3  |
| 4.415898479 | 3.500182 | E9AVC8     | tr E9AVC8 E9AVC8_LEIMU Uncharacterized protein OS=Leishr    | 2  |
| 5.172339964 | 3.489302 | E9B620     | tr E9B620 E9B620_LEIMU Putative threonyl-tRNA synthetase (  | 15 |
| 4.876175001 | 3.48726  | E9B260;Q25 | tr E9B260 E9B260_LEIMU DNA-directed RNA polymerase subu     | 7  |
| 4.883234219 | 3.482195 | E9AV88     | tr E9AV88 E9AV88_LEIMU Putative kinesin OS=Leishmania me    | 3  |
| 5.269415532 | 3.473055 | E9ANM2;E9  | tr E9ANM2 E9ANM2_LEIMU Putative 40S ribosomal protein S2    | 3  |
| 4.709719936 | 3.471505 | E9B6X6     | tr E9B6X6 E9B6X6_LEIMU Uncharacterized protein OS=Leishm    | 4  |
| 5.163210426 | 3.469893 | E9B2N8     | tr E9B2N8 E9B2N8_LEIMU Uncharacterized protein OS=Leishr    | 2  |
| 4.240631963 | 3.468148 | E9B694     | tr E9B694 E9B694_LEIMU Uncharacterized protein OS=Leishm    | 2  |
| 4.998078995 | 3.467073 | E9B547     | tr E9B547 E9B547_LEIMU Uncharacterized protein OS=Leishm    | 4  |
| 5.163368087 | 3.465377 | E9B6X2     | tr E9B6X2 E9B6X2_LEIMU Putative mitochondrial phosphate ti  | 5  |
| 4.200241969 | 3.462568 | E9B360     | tr E9B360 E9B360_LEIMU Putative RNA-binding protein OS=Le   | 2  |
| 4.40019318  | 3.462121 | E9AKY6     | tr E9AKY6 E9AKY6_LEIMU Putative deoxyribose-phosphate ald   | 2  |
| 4.369822865 | 3.457567 | E9B4E9     | tr E9B4E9 E9B4E9_LEIMU Uncharacterized protein OS=Leishm    | 3  |
| 4.610741097 | 3.448931 | O76285;E9A | tr O76285 O76285_LEIAM Ribonucleotide reductase M2 subur    | 4  |
| 4.945842701 | 3.448687 | E9ANN4     | tr E9ANN4 E9ANN4_LEIMU Putative 60S ribosomal protein L24   | 2  |
| 4.646623798 | 3.446906 | E9AV16     | tr E9AV16 E9AV16_LEIMU Putative DnaJ protein OS=Leishman    | 6  |
| 4.572938209 | 3.443773 | E9APA5     | tr E9APA5 E9APA5_LEIMU Uncharacterized protein OS=Leishr    | 2  |
| 4.573597912 | 3.437887 | E9AKA4;C6k | tr E9AKA4 E9AKA4_LEIMU Actin OS=Leishmania mexicana (stri   | 14 |
| 5.475413569 | 3.431223 | E9APQ1     | tr E9APQ1 E9APQ1_LEIMU Uncharacterized protein OS=Leishr    | 5  |
| 4.7404212   | 3.430161 | E9AKM5     | tr E9AKM5 E9AKM5_LEIMU Uncharacterized protein OS=Leish     | 2  |
| 5.398136564 | 3.429595 | E9AZ08     | tr E9AZ08 E9AZ08_LEIMU Putative cysteine desulfurase OS=Le  | 6  |
| 5.196162899 | 3.426702 | E9B0B0     | tr E9B0B0 E9B0B0_LEIMU Putative dynein heavy chain OS=Lei:  | 5  |
| 5.304626929 | 3.423057 | E9B397     | tr E9B397 E9B397_LEIMU Pyrroline-5-carboxylate synthetase-  | 2  |
| 4.860292282 | 3.419999 | E9AVC7     | tr E9AVC7 E9AVC7_LEIMU 2-oxoisovalerate dehydrogenase su    | 4  |
| 4.653507393 | 3.414946 | E9B4N4     | tr E9B4N4 E9B4N4_LEIMU Proteasome regulatory non-ATP-as     | 2  |
| 4.683851871 | 3.411289 | E9AN96     | tr E9AN96 E9AN96_LEIMU Uncharacterized protein OS=Leishn    | 2  |
| 5.471825393 | 3.408538 | E9AMC1     | tr E9AMC1 E9AMC1_LEIMU Uncharacterized protein OS=Leish     | 5  |
| 4.872016181 | 3.407445 | E9AW77     | tr E9AW77 E9AW77_LEIMU Uncharacterized protein OS=Leish     | 2  |
| 4.416633859 | 3.403603 | E9AKC2     | tr E9AKC2 E9AKC2_LEIMU Dihydrolipoamide acetyltransferase   | 2  |
| 4.384719132 | 3.398496 | E9AXT6     | tr E9AXT6 E9AXT6_LEIMU Uncharacterized protein OS=Leishm    | 2  |
| 4.830928628 | 3.394872 | E9AW79     | tr E9AW79 E9AW79_LEIMU Uncharacterized protein OS=Leish     | 5  |
| 5.297507614 | 3.393244 | E9B722     | tr E9B722 E9B722_LEIMU Uncharacterized protein OS=Leishm    | 3  |
| 4.358765995 | 3.39286  | E9AV20     | tr E9AV20 E9AV20_LEIMU Uncharacterized protein OS=Leishr    | 2  |
| 5.15107825  | 3.391143 | E9ALB7     | tr E9ALB7 E9ALB7_LEIMU RNA binding protein-like protein OS: | 14 |
| 5.006592522 | 3.387983 | E9AV49;A0/ | tr E9AV49 E9AV49_LEIMU Putative methionyl-tRNA synthetase   | 8  |
| 5.224660291 | 3.383366 | E9AVM8     | tr E9AVM8 E9AVM8_LEIMU Uncharacterized protein OS=Leish     | 2  |
| 4.666660423 | 3.379459 | E9AQ24     | tr E9AQ24 E9AQ24_LEIMU Lysine--tRNA ligase OS=Leishmania    | 8  |
| 4.580218978 | 3.376836 | Q86PL6;E9A | tr Q86PL6 Q86PL6_LEIME Paraflagellar rod protein 4 OS=Leish | 2  |
| 4.252126178 | 3.37118  | E9AU70     | tr E9AU70 E9AU70_LEIMU Uncharacterized protein OS=Leishn    | 2  |
| 4.82052355  | 3.368586 | E9B4G7     | tr E9B4G7 E9B4G7_LEIMU Uncharacterized protein OS=Leishr    | 6  |
| 5.050324271 | 3.365063 | E9AVW8     | tr E9AVW8 E9AVW8_LEIMU Putative farnesyl pyrophosphate s    | 2  |
| 5.43027655  | 3.362785 | E9B1Q2     | tr E9B1Q2 E9B1Q2_LEIMU Uncharacterized protein OS=Leishn    | 6  |

|             |          |            |                                                               |    |
|-------------|----------|------------|---------------------------------------------------------------|----|
| 5.230951522 | 3.361893 | E9AQX3     | tr E9AQX3 E9AQX3_LEIMU Uncharacterized protein OS=Leishr      | 6  |
| 5.400652788 | 3.355206 | E9AU12     | tr E9AU12 E9AU12_LEIMU tRNA (adenine(58)-N(1))-methyltra      | 3  |
| 5.074083381 | 3.350886 | E9ANB3     | tr E9ANB3 E9ANB3_LEIMU RNA-binding protein-like protein O     | 5  |
| 5.162012577 | 3.348813 | E9ARK0     | tr E9ARK0 E9ARK0_LEIMU Putative 60S ribosomal protein L10;    | 6  |
| 5.747158347 | 3.347594 | E9AQM8     | tr E9AQM8 E9AQM8_LEIMU Uncharacterized protein OS=Leish       | 3  |
| 4.535135067 | 3.341085 | E9AP43     | tr E9AP43 E9AP43_LEIMU Putative carboxypeptidase (Metallo     | 2  |
| 4.923372877 | 3.332406 | E9AVL4     | tr E9AVL4 E9AVL4_LEIMU Uncharacterized protein OS=Leishm      | 10 |
| 4.892696602 | 3.33127  | E9AR48     | tr E9AR48 E9AR48_LEIMU Uncharacterized protein OS=Leishm      | 4  |
| 5.443283685 | 3.323018 | E9B4J8     | tr E9B4J8 E9B4J8_LEIMU Uncharacterized protein OS=Leishma     | 7  |
| 4.672330521 | 3.321522 | E9AU20     | tr E9AU20 E9AU20_LEIMU Uncharacterized protein OS=Leishn      | 10 |
| 4.444266698 | 3.317315 | E9AK43     | tr E9AK43 E9AK43_LEIMU Uncharacterized protein OS=Leishm      | 3  |
| 6.273276399 | 3.300904 | E9AR97     | tr E9AR97 E9AR97_LEIMU RNA cytidine acetyltransferase OS=l    | 4  |
| 4.472234189 | 3.298798 | E9AZZ7     | tr E9AZZ7 E9AZZ7_LEIMU DNA topoisomerase OS=Leishmania        | 2  |
| 4.717014816 | 3.295271 | E9AYV1     | tr E9AYV1 E9AYV1_LEIMU Putative calpain-like cysteine peptic  | 8  |
| 4.463899128 | 3.29449  | E9AJV4     | tr E9AJV4 E9AJV4_LEIMU Uncharacterized protein OS=Leishm;     | 2  |
| 5.256539952 | 3.28231  | E9AYA4     | tr E9AYA4 E9AYA4_LEIMU Uncharacterized protein OS=Leishr      | 4  |
| 4.75069592  | 3.278465 | E9AXM2     | tr E9AXM2 E9AXM2_LEIMU Uncharacterized protein OS=Leish       | 16 |
| 5.102262701 | 3.278154 | E9ALG7     | tr E9ALG7 E9ALG7_LEIMU Putative serine/threonine-protein k    | 4  |
| 5.287702711 | 3.274379 | E9B276     | tr E9B276 E9B276_LEIMU Uncharacterized protein OS=Leishm      | 4  |
| 4.663476646 | 3.272696 | E9AUB0     | tr E9AUB0 E9AUB0_LEIMU Putative prolyl oligopeptidase OS=l    | 6  |
| 6.095810419 | 3.269946 | E9AWD4     | tr E9AWD4 E9AWD4_LEIMU Putative coronin OS=Leishmania r       | 3  |
| 4.851840352 | 3.26629  | E8NHN7;E9  | tr E8NHN7 E8NHN7_LEIMU WGS CADB00000000 data, contig          | 4  |
| 5.10340543  | 3.266183 | Q25332;Q2  | tr Q25332 Q25332_LEIME Secreted acid phosphatase 1 (SAP1)     | 11 |
| 5.336868389 | 3.264125 | E9AR33;E9A | tr E9AR33 E9AR33_LEIMU Uncharacterized protein OS=Leishm      | 4  |
| 5.751810724 | 3.257864 | E9B430     | tr E9B430 E9B430_LEIMU Putative phosphoribosylpyrophosph      | 2  |
| 5.54149575  | 3.255627 | E9AV82     | tr E9AV82 E9AV82_LEIMU Uncharacterized protein OS=Leishr      | 8  |
| 4.687973406 | 3.25399  | E9B2Q9     | tr E9B2Q9 E9B2Q9_LEIMU Cleavage and polyadenylation spec      | 5  |
| 4.555191585 | 3.252728 | E9AZ92     | tr E9AZ92 E9AZ92_LEIMU Uncharacterized protein OS=Leishm      | 2  |
| 4.96344843  | 3.249777 | E9ALA4     | tr E9ALA4 E9ALA4_LEIMU Splicing factor ptrs1-like protein OS- | 21 |
| 5.426569672 | 3.245074 | E9ARE6     | tr E9ARE6 E9ARE6_LEIMU Putative alpha glucosidase II subuni   | 2  |
| 6.992249506 | 3.240934 | E9AXU5     | tr E9AXU5 E9AXU5_LEIMU Uncharacterized protein OS=Leishn      | 2  |
| 4.234364103 | 3.223638 | E9B235     | tr E9B235 E9B235_LEIMU Uncharacterized protein OS=Leishm      | 2  |
| 4.907902624 | 3.215418 | E9AYF9     | tr E9AYF9 E9AYF9_LEIMU Uncharacterized protein OS=Leishm      | 17 |
| 5.539805353 | 3.214923 | E9B4H4;Q8I | tr E9B4H4 E9B4H4_LEIMU Glucose-6-phosphate 1-dehydroger       | 7  |
| 5.713772845 | 3.212655 | E9AWS6;A0  | tr E9AWS6 E9AWS6_LEIMU Triosephosphate isomerase OS=Le        | 2  |
| 4.114178579 | 3.20737  | E9AY72     | tr E9AY72 E9AY72_LEIMU Uncharacterized protein OS=Leishm      | 2  |
| 3.654440686 | 3.206979 | E9ANX1     | tr E9ANX1 E9ANX1_LEIMU Uncharacterized protein OS=Leishn      | 2  |
| 4.652933656 | 3.204494 | E9AW60     | tr E9AW60 E9AW60_LEIMU Uncharacterized protein OS=Leish       | 2  |
| 4.976169847 | 3.199362 | E9AWK2     | tr E9AWK2 E9AWK2_LEIMU Guanine nucleotide-binding prote       | 2  |
| 5.277805835 | 3.194966 | E9AYP0     | tr E9AYP0 E9AYP0_LEIMU Uncharacterized protein OS=Leishm      | 2  |
| 5.011254391 | 3.194503 | E9AQQ4;A0  | tr E9AQQ4 E9AQQ4_LEIMU Sucrose-phosphate synthase-like p      | 3  |
| 5.475512874 | 3.193815 | E9B6P8     | tr E9B6P8 E9B6P8_LEIMU Putative Gim5A protein (Glycosoma      | 3  |
| 4.695658709 | 3.193683 | E9B2W9     | tr E9B2W9 E9B2W9_LEIMU Uncharacterized protein OS=Leish       | 4  |
| 4.349118829 | 3.184145 | E9AXP7     | tr E9AXP7 E9AXP7_LEIMU Uncharacterized protein OS=Leishm      | 2  |
| 4.909684955 | 3.180896 | E9B278     | tr E9B278 E9B278_LEIMU Putative ADP-ribosylation factor OS-   | 2  |
| 5.05264027  | 3.180808 | Q6T9E2;E9A | tr Q6T9E2 Q6T9E2_LEIAM Uncharacterized protein OS=Leishr      | 2  |
| 4.981015202 | 3.17272  | E9APV8;E8M | tr E9APV8 E9APV8_LEIMU Putative kinesin K39 OS=Leishmani;     | 5  |
| 5.592540496 | 3.172146 | E9AXC4     | tr E9AXC4 E9AXC4_LEIMU Uncharacterized protein OS=Leishm      | 3  |
| 5.137325278 | 3.163223 | E9AJN3     | tr E9AJN3 E9AJN3_LEIMU Putative ATP-dependent Clp proteas     | 8  |
| 4.74189293  | 3.143224 | E9AYK0     | tr E9AYK0 E9AYK0_LEIMU Uncharacterized protein OS=Leishm      | 2  |
| 5.689169539 | 3.139943 | E9ARF2     | tr E9ARF2 E9ARF2_LEIMU Serine/threonine protein phosphata     | 4  |
| 4.466355518 | 3.129149 | E9AS74     | tr E9AS74 E9AS74_LEIMU Uncharacterized protein OS=Leishm      | 3  |

|             |          |            |                        |                                                        |    |
|-------------|----------|------------|------------------------|--------------------------------------------------------|----|
| 5.381602127 | 3.124825 | E9B0Z8     | tr E9B0Z8 E9B0Z8_LEIMU | Conserved zinc-finger protein OS=Leishm                | 3  |
| 5.165697817 | 3.120547 | Q25327;E9A | tr Q25327 Q25327_LEIME | Membrane-bound acid phosphatase OS=Leishm              | 9  |
| 4.802031188 | 3.116186 | E9AZN4     | tr E9AZN4 E9AZN4_LEIMU | Uncharacterized protein OS=Leishm                      | 3  |
| 4.822097903 | 3.102993 | E9AT28     | tr E9AT28 E9AT28_LEIMU | Nuclear pore protein OS=Leishmani                      | 3  |
| 4.791916106 | 3.095139 | E9B1D2     | tr E9B1D2 E9B1D2_LEIMU | Putative serine/threonine-protein kinase OS=Leishm     | 11 |
| 4.007540076 | 3.090742 | E9AJE1     | tr E9AJE1 E9AJE1_LEIMU | Uncharacterized protein OS=Leishm                      | 3  |
| 4.795129158 | 3.089192 | E9B4S8     | tr E9B4S8 E9B4S8_LEIMU | Putative mitochondrial ATP-dependent protein OS=Leishm | 2  |
| 4.895260888 | 3.088432 | E9AQE3     | tr E9AQE3 E9AQE3_LEIMU | Putative ribosomal protein S6 (Nph) OS=Leishm          | 2  |
| 4.927975999 | 3.083321 | E9AX01     | tr E9AX01 E9AX01_LEIMU | Uncharacterized protein OS=Leishm                      | 8  |
| 4.917112125 | 3.055813 | E9B3C6;E9B | tr E9B3C6 E9B3C6_LEIMU | Uncharacterized protein (Fragment) OS=Leishm           | 5  |
| 5.732265685 | 3.049799 | E9B4J1     | tr E9B4J1 E9B4J1_LEIMU | Uncharacterized protein OS=Leishm                      | 3  |
| 4.676183403 | 3.045488 | E9AVZ3     | tr E9AVZ3 E9AVZ3_LEIMU | Uncharacterized protein OS=Leishm                      | 7  |
| 5.022486891 | 3.038962 | E9AKL0;Q86 | tr E9AKL0 E9AKL0_LEIMU | Stomatin-like protein OS=Leishmani                     | 5  |
| 5.018531568 | 3.016406 | E9B548     | tr E9B548 E9B548_LEIMU | Uncharacterized protein OS=Leishm                      | 5  |
| 5.570732669 | 3.013945 | E8NHL4     | tr E8NHL4 E8NHL4_LEIMU | Brix domain containing-like protein OS=Leishm          | 5  |
| 5.306355485 | 3.008605 | E9AXT3     | tr E9AXT3 E9AXT3_LEIMU | Uncharacterized protein OS=Leishm                      | 3  |
| 5.02947255  | 2.999018 | E9B3Y6     | tr E9B3Y6 E9B3Y6_LEIMU | Uncharacterized protein OS=Leishm                      | 2  |
| 5.116469035 | 2.998301 | E9B2B1     | tr E9B2B1 E9B2B1_LEIMU | Uncharacterized protein OS=Leishm                      | 8  |
| 5.36184668  | 2.988921 | E9AVG8     | tr E9AVG8 E9AVG8_LEIMU | 60S ribosomal protein L32 OS=Leishm                    | 3  |
| 5.275404834 | 2.970933 | E9B6K7     | tr E9B6K7 E9B6K7_LEIMU | Putative 60S ribosomal subunit protein OS=Leishm       | 10 |
| 4.59807765  | 2.967065 | E9ATR2     | tr E9ATR2 E9ATR2_LEIMU | Uncharacterized protein OS=Leishm                      | 3  |
| 4.564426639 | 2.96693  | E9B228     | tr E9B228 E9B228_LEIMU | Uncharacterized protein OS=Leishm                      | 3  |
| 5.138027001 | 2.96421  | E9B6R8     | tr E9B6R8 E9B6R8_LEIMU | Uncharacterized protein OS=Leishm                      | 2  |
| 5.118054889 | 2.962158 | E9AKC8;E9A | tr E9AKC8 E9AKC8_LEIMU | Putative viscerotropic leishmaniasis protein OS=Leishm | 2  |
| 6.118007142 | 2.958272 | E9AUC8     | tr E9AUC8 E9AUC8_LEIMU | Uncharacterized protein OS=Leishm                      | 3  |
| 4.186130222 | 2.95767  | E9AZ12     | tr E9AZ12 E9AZ12_LEIMU | Uncharacterized protein OS=Leishm                      | 6  |
| 5.29987572  | 2.947287 | E9AQZ4     | tr E9AQZ4 E9AQZ4_LEIMU | Cystathionine beta-synthase OS=Leishm                  | 5  |
| 4.340597733 | 2.943685 | E9B1H3     | tr E9B1H3 E9B1H3_LEIMU | Uncharacterized protein OS=Leishm                      | 2  |
| 4.339769299 | 2.943571 | E9AN63     | tr E9AN63 E9AN63_LEIMU | Uncharacterized protein OS=Leishm                      | 3  |
| 5.031213942 | 2.938602 | E9AK24     | tr E9AK24 E9AK24_LEIMU | Uncharacterized protein OS=Leishm                      | 8  |
| 5.698588913 | 2.932472 | E9AQY8     | tr E9AQY8 E9AQY8_LEIMU | Uncharacterized protein OS=Leishm                      | 4  |
| 5.468555416 | 2.929178 | E9AW99     | tr E9AW99 E9AW99_LEIMU | Uncharacterized protein OS=Leishm                      | 2  |
| 4.363829786 | 2.925803 | E9AVW4     | tr E9AVW4 E9AVW4_LEIMU | Uncharacterized protein OS=Leishm                      | 6  |
| 4.548047944 | 2.924732 | E9ALS6     | tr E9ALS6 E9ALS6_LEIMU | Uncharacterized protein OS=Leishm                      | 7  |
| 4.849703064 | 2.919084 | E9AP27     | tr E9AP27 E9AP27_LEIMU | Arginine N-methyltransferase-like protein OS=Leishm    | 3  |
| 4.150424412 | 2.917714 | E9AVX8     | tr E9AVX8 E9AVX8_LEIMU | I/6 autoantigen-like protein OS=Leishm                 | 6  |
| 4.247234142 | 2.895426 | E9ATV9     | tr E9ATV9 E9ATV9_LEIMU | Uncharacterized protein OS=Leishm                      | 2  |
| 4.428054926 | 2.881882 | E9B0K3     | tr E9B0K3 E9B0K3_LEIMU | Uncharacterized protein OS=Leishm                      | 3  |
| 5.567739738 | 2.875933 | E9B2D5     | tr E9B2D5 E9B2D5_LEIMU | Uncharacterized protein OS=Leishm                      | 3  |
| 4.544979092 | 2.854872 | E9ALP4     | tr E9ALP4 E9ALP4_LEIMU | Putative 40S ribosomal protein S15A OS=Leishm          | 4  |
| 4.599908804 | 2.853579 | E9AL32     | tr E9AL32 E9AL32_LEIMU | Uncharacterized protein OS=Leishm                      | 4  |
| 4.627462554 | 2.811471 | E9AY66;Q86 | tr E9AY66 E9AY66_LEIMU | Putative 40S ribosomal protein S16 OS=Leishm           | 9  |
| 4.51252764  | 2.807166 | E9AJ92     | tr E9AJ92 E9AJ92_LEIMU | Uncharacterized protein OS=Leishm                      | 3  |
| 4.505070979 | 2.802599 | E9AYS6     | tr E9AYS6 E9AYS6_LEIMU | Kinetoplast-associated protein-like protein OS=Leishm  | 2  |
| 5.449521223 | 2.771585 | E9AS32     | tr E9AS32 E9AS32_LEIMU | Putative ABC transporter OS=Leishm                     | 7  |
| 5.169508245 | 2.771491 | E9B4W0     | tr E9B4W0 E9B4W0_LEIMU | Uncharacterized protein OS=Leishm                      | 4  |
| 4.248749993 | 2.749655 | E9B2Z3     | tr E9B2Z3 E9B2Z3_LEIMU | Uncharacterized protein OS=Leishm                      | 2  |
| 4.890192674 | 2.722991 | E9ATF6;E9A | tr E9ATF6 E9ATF6_LEIMU | Putative 60S ribosomal protein L34 OS=Leishm           | 6  |
| 4.649838528 | 2.674762 | E9AM51     | tr E9AM51 E9AM51_LEIMU | Uncharacterized protein OS=Leishm                      | 2  |
| 4.999453024 | 2.663591 | E9AS55     | tr E9AS55 E9AS55_LEIMU | Putative phenylalanyl-tRNA synthetase OS=Leishm        | 2  |
| 5.175178061 | 2.630855 | E9AQU8     | tr E9AQU8 E9AQU8_LEIMU | Uncharacterized protein OS=Leishm                      | 2  |
| 4.792658665 | 2.629485 | E9ANM7     | tr E9ANM7 E9ANM7_LEIMU | Uncharacterized protein OS=Leishm                      | 2  |

|             |          |           |                        |                                      |   |
|-------------|----------|-----------|------------------------|--------------------------------------|---|
| 5.363423966 | 2.547973 | E9AYN3    | tr E9AYN3 E9AYN3_LEIMU | Uncharacterized protein OS=Leishm    | 2 |
| 5.229068014 | 2.501087 | E9AWQ4;E9 | tr E9AWQ4 E9AWQ4_LEIMU | Kinesin-like protein OS=Leishman     | 4 |
| 4.840316994 | 2.440564 | Q4KXA6;E9 | tr Q4KXA6 Q4KXA6_LEIME | Cytoplasmic dynein heavy chain 2.1   | 7 |
| 4.499561328 | 2.429992 | E9ARN6    | tr E9ARN6 E9ARN6_LEIMU | UTP--glucose-1-phosphate uridylyl    | 3 |
| 4.509381547 | 2.356462 | Q0PKV3;E9 | tr Q0PKV3 Q0PKV3_LEIME | Putative glycogen synthase kinase 3  | 4 |
| 4.442143305 | 2.32498  | E9AMT0    | tr E9AMT0 E9AMT0_LEIMU | Uncharacterized protein OS=Leish     | 2 |
| 4.527856296 | 2.271343 | E9AQ88    | tr E9AQ88 E9AQ88_LEIMU | Putative ABC transporter OS=Leishi   | 2 |
| 4.573868156 | 2.126379 | E9B2X8    | tr E9B2X8 E9B2X8_LEIMU | Uncharacterized protein OS=Leishm    | 2 |
| 4.173792163 | 2.124404 | E9ANN3    | tr E9ANN3 E9ANN3_LEIMU | Uncharacterized protein OS=Leishi    | 4 |
| 5.303734683 | 2.117087 | E9AP91    | tr E9AP91 E9AP91_LEIMU | Putative lectin OS=Leishmania mexi   | 2 |
| 4.490107836 | 1.952153 | E9B0E9    | tr E9B0E9 E9B0E9_LEIMU | Putative ubiquitin hydrolase OS=Leis | 2 |



Table S2. RBPs in *L. mexicana* axenic amastigotes

| [-Log(P-value)] | log2 FC | Protein IDs | Fasta headers                                       | Unique peptides |
|-----------------|---------|-------------|-----------------------------------------------------|-----------------|
| 4.129283892     | 4.4868  | E9B4D7      | tr E9B4D7 E9B4D7_LEIMU Uncharacterized protein C    | 2               |
| 4.867424935     | 3.6974  | E9AN57;E9A  | tr E9AN57 E9AN57_LEIMU GP63, leishmanolysin OS=     | 4               |
| 4.769553812     | 3.6853  | E9B600      | tr E9B600 E9B600_LEIMU Uncharacterized protein C    | 2               |
| 5.136589823     | 3.6298  | E9AM02      | tr E9AM02 E9AM02_LEIMU Putative lipophosphogly      | 11              |
| 4.607237662     | 3.4678  | E9AJC9      | tr E9AJC9 E9AJC9_LEIMU 40S ribosomal protein S7 C   | 7               |
| 4.964889836     | 3.2813  | E9ASR3      | tr E9ASR3 E9ASR3_LEIMU Putative translation elonga  | 4               |
| 4.184398215     | 3.2614  | E9AP91      | tr E9AP91 E9AP91_LEIMU Putative lectin OS=Leishm    | 2               |
| 4.397830244     | 3.2327  | E9B350;E9B  | tr E9B350 E9B350_LEIMU Putative ribosomal proteir   | 5               |
| 4.594648105     | 3.2096  | E9AL18      | tr E9AL18 E9AL18_LEIMU Putative Golgi/lysosome gl   | 2               |
| 4.434616824     | 3.1653  | E9B078      | tr E9B078 E9B078_LEIMU Putative 40S ribosomal pro   | 4               |
| 4.270588588     | 3.1577  | E9AWA7;Q9   | tr E9AWA7 E9AWA7_LEIMU Cytosolic leucyl aminop      | 2               |
| 4.649272969     | 3.132   | E9AXU1      | tr E9AXU1 E9AXU1_LEIMU Uncharacterized protein C    | 2               |
| 4.659491177     | 3.109   | E9ARJ2      | tr E9ARJ2 E9ARJ2_LEIMU Uncharacterized protein O    | 2               |
| 4.626068418     | 3.0983  | E9AW91;Q5   | tr E9AW91 E9AW91_LEIMU Putative mitochondrial F     | 5               |
| 4.446869606     | 3.0684  | E9B714      | tr E9B714 E9B714_LEIMU Uncharacterized protein C    | 2               |
| 4.849581393     | 3.0605  | E9B4Q3;E9B  | tr E9B4Q3 E9B4Q3_LEIMU Elongation factor 1-beta C   | 6               |
| 4.354295499     | 2.9856  | O46368;E9B  | tr O46368 O46368_LEIME Surface protein amastin O    | 2               |
| 4.992450042     | 2.9713  | E9AKP0      | tr E9AKP0 E9AKP0_LEIMU Peptidyl-prolyl cis-trans is | 4               |
| 4.80810464      | 2.9711  | E9AK98      | tr E9AK98 E9AK98_LEIMU Putative RNA-binding prot    | 3               |
| 4.73356256      | 2.9278  | E9AY45;A7Y  | tr E9AY45 E9AY45_LEIMU Uncharacterized protein C    | 11              |
| 4.550747248     | 2.8976  | E9AR33;E9A  | tr E9AR33 E9AR33_LEIMU Uncharacterized protein C    | 2               |
| 4.290695534     | 2.8846  | E9AQ05      | tr E9AQ05 E9AQ05_LEIMU Uncharacterized protein C    | 3               |
| 4.620602607     | 2.8712  | E9B170;Q27  | tr E9B170 E9B170_LEIMU Glyceraldehyde-3-phospha     | 15              |
| 4.869830786     | 2.8709  | E9B5N7      | tr E9B5N7 E9B5N7_LEIMU Uncharacterized protein C    | 3               |
| 5.290132585     | 2.8536  | E9B189      | tr E9B189 E9B189_LEIMU Uncharacterized protein C    | 3               |
| 4.920548023     | 2.8314  | E9AM03      | tr E9AM03 E9AM03_LEIMU Putative U3 small nuclec     | 4               |
| 4.768822084     | 2.8187  | E9AZT9      | tr E9AZT9 E9AZT9_LEIMU Putative glucose-regulatec   | 24              |
| 3.821320124     | 2.8112  | E9AW79      | tr E9AW79 E9AW79_LEIMU Uncharacterized protein      | 6               |
| 4.498217421     | 2.809   | E9AQY8      | tr E9AQY8 E9AQY8_LEIMU Uncharacterized protein C    | 5               |
| 4.422706147     | 2.8048  | E9AYU4      | tr E9AYU4 E9AYU4_LEIMU Ribokinase OS=Leishmani      | 2               |
| 5.08943538      | 2.7902  | E9AUB1      | tr E9AUB1 E9AUB1_LEIMU Uncharacterized protein C    | 11              |
| 4.582388089     | 2.7804  | E9B1V7      | tr E9B1V7 E9B1V7_LEIMU Putative cytochrome c oxi    | 2               |
| 4.271056255     | 2.7403  | E9AUZ2;E9A  | tr E9AUZ2 E9AUZ2_LEIMU Phosphotransferase OS=L      | 20              |
| 5.413434965     | 2.7362  | E9AT36      | tr E9AT36 E9AT36_LEIMU Putative membrane-boun       | 3               |
| 4.639027831     | 2.7345  | E9AR51      | tr E9AR51 E9AR51_LEIMU Ysine decarboxylase-like p   | 6               |
| 4.541879368     | 2.725   | E9AVK9      | tr E9AVK9 E9AVK9_LEIMU Uncharacterized protein C    | 3               |
| 5.119057263     | 2.7178  | E9ART5      | tr E9ART5 E9ART5_LEIMU Putative P-type H+-ATPase    | 2               |
| 4.16506619      | 2.7145  | E9AWI3      | tr E9AWI3 E9AWI3_LEIMU V-type proton ATPase su      | 6               |
| 4.450159833     | 2.7122  | E9B5Z0      | tr E9B5Z0 E9B5Z0_LEIMU Uncharacterized protein O    | 3               |
| 4.280164332     | 2.7102  | E9AWP2      | tr E9AWP2 E9AWP2_LEIMU Putative DNAJ domain p       | 2               |
| 4.291790976     | 2.6972  | E9B716      | tr E9B716 E9B716_LEIMU Uncharacterized protein C    | 3               |
| 3.597875693     | 2.6883  | E9B548      | tr E9B548 E9B548_LEIMU Uncharacterized protein C    | 3               |
| 3.985650553     | 2.6824  | E9AQA9      | tr E9AQA9 E9AQA9_LEIMU Uncharacterized protein      | 4               |
| 4.383514431     | 2.6822  | E9AXI5      | tr E9AXI5 E9AXI5_LEIMU Uncharacterized protein OS   | 2               |
| 4.170254393     | 2.6742  | E9AMV6      | tr E9AMV6 E9AMV6_LEIMU Phospholipid:diacylglyce     | 3               |
| 4.499118852     | 2.6685  | E9AU51      | tr E9AU51 E9AU51_LEIMU Uncharacterized protein C    | 2               |

|             |        |            |                        |                             |    |
|-------------|--------|------------|------------------------|-----------------------------|----|
| 4.51463173  | 2.6669 | E9AS79     | tr E9AS79 E9AS79_LEIMU | Uncharacterized protein O   | 2  |
| 4.980552148 | 2.6562 | E9AK97     | tr E9AK97 E9AK97_LEIMU | Putative fructose-1,6-bisp  | 3  |
| 4.376754374 | 2.6287 | E9B5I2     | tr E9B5I2 E9B5I2_LEIMU | Uncharacterized protein OS  | 2  |
| 4.511353054 | 2.6193 | E9AS47     | tr E9AS47 E9AS47_LEIMU | Peptidylprolyl isomerase C  | 2  |
| 4.663968302 | 2.6181 | E9AKL0;Q86 | tr E9AKL0 E9AKL0_LEIMU | Stomatin-like protein OS=L  | 10 |
| 3.761135618 | 2.6131 | E9B5Z2;E9B | tr E9B5Z2 E9B5Z2_LEIMU | Oligosaccharyl transferase  | 6  |
| 4.851203164 | 2.607  | E9AU66     | tr E9AU66 E9AU66_LEIMU | Serine/threonine-protein    | 5  |
| 3.88667969  | 2.6024 | E9AJK8     | tr E9AJK8 E9AJK8_LEIMU | Uncharacterized protein O'  | 8  |
| 4.467553438 | 2.5949 | E9ARW0     | tr E9ARW0 E9ARW0_LEIMU | Uncharacterized proteir     | 5  |
| 4.75346917  | 2.577  | E9AZ96     | tr E9AZ96 E9AZ96_LEIMU | Uncharacterized protein C   | 2  |
| 4.003731693 | 2.5644 | E9ANW2     | tr E9ANW2 E9ANW2_LEIMU | Uncharacterized protei      | 2  |
| 3.824511047 | 2.5632 | E9B2V9;E9B | tr E9B2V9 E9B2V9_LEIMU | Superoxide dismutase OS-    | 2  |
| 3.232529957 | 2.5631 | E9AU11;E9A | tr E9AU11 E9AU11_LEIMU | Uncharacterized protein O   | 2  |
| 4.047066395 | 2.561  | E9ALR2     | tr E9ALR2 E9ALR2_LEIMU | Transmembrane 9 superfa     | 2  |
| 4.156283175 | 2.5598 | E9AJM9     | tr E9AJM9 E9AJM9_LEIMU | Putative mitochondrial ca   | 2  |
| 3.884414239 | 2.5583 | E9AY83     | tr E9AY83 E9AY83_LEIMU | Uncharacterized protein C   | 7  |
| 4.699770496 | 2.5409 | E9AXI9     | tr E9AXI9 E9AXI9_LEIMU | DNAj-like protein OS=Leishi | 5  |
| 4.021328138 | 2.5358 | E9ALS3;E8N | tr E9ALS3 E9ALS3_LEIMU | Uncharacterized protein O   | 2  |
| 5.375954618 | 2.5182 | E9B560     | tr E9B560 E9B560_LEIMU | Uncharacterized protein C   | 4  |
| 4.951062372 | 2.5142 | E9ASU7     | tr E9ASU7 E9ASU7_LEIMU | Uncharacterized protein C   | 3  |
| 3.881372059 | 2.503  | E9AUJ5     | tr E9AUJ5 E9AUJ5_LEIMU | Uncharacterized protein O   | 2  |
| 4.204360405 | 2.4692 | E9B1S0     | tr E9B1S0 E9B1S0_LEIMU | Putative vacuolar-type pro  | 12 |
| 4.300514304 | 2.4653 | E9B612     | tr E9B612 E9B612_LEIMU | Uncharacterized protein C   | 8  |
| 3.836603209 | 2.4545 | E9B5E6     | tr E9B5E6 E9B5E6_LEIMU | Uncharacterized protein O   | 2  |
| 4.459116643 | 2.4387 | E9ASZ2     | tr E9ASZ2 E9ASZ2_LEIMU | Putative COP-coated vesicl  | 2  |
| 4.47041267  | 2.437  | E9B632     | tr E9B632 E9B632_LEIMU | Putative reiske iron-sulfur | 5  |
| 3.750183079 | 2.4337 | E9ALD0     | tr E9ALD0 E9ALD0_LEIMU | Uncharacterized protein C   | 2  |
| 4.279177508 | 2.4264 | E9B2C7     | tr E9B2C7 E9B2C7_LEIMU | Putative syntaxin 5 OS=Lei  | 2  |
| 3.606438935 | 2.4252 | E9B259     | tr E9B259 E9B259_LEIMU | Putative calreticulin OS=Le | 4  |
| 3.299344148 | 2.4249 | E9AR71     | tr E9AR71 E9AR71_LEIMU | Uncharacterized protein C   | 2  |
| 4.472024826 | 2.4227 | E9ARV5;E9A | tr E9ARV5 E9ARV5_LEIMU | Histone H2B OS=Leishma      | 2  |
| 4.523601779 | 2.4216 | E9AUD1;A7  | tr E9AUD1 E9AUD1_LEIMU | Protein disulfide-isomera   | 19 |
| 4.577975306 | 2.4198 | E9B3B4     | tr E9B3B4 E9B3B4_LEIMU | Dihydrolipoyl dehydrogen    | 8  |
| 4.225107992 | 2.3995 | E9ALL2     | tr E9ALL2 E9ALL2_LEIMU | Uncharacterized protein O'  | 9  |
| 4.158901016 | 2.3958 | E9AZI2     | tr E9AZI2 E9AZI2_LEIMU | Histone H2B OS=Leishmani    | 2  |
| 4.281036315 | 2.3947 | E9B700     | tr E9B700 E9B700_LEIMU | Uncharacterized protein C   | 11 |
| 4.258216073 | 2.3946 | E9AXJ2     | tr E9AXJ2 E9AXJ2_LEIMU | Putative cytochrome c oxid  | 2  |
| 4.091593027 | 2.3894 | E9ALH3     | tr E9ALH3 E9ALH3_LEIMU | ATP-dependent 6-phosph      | 13 |
| 4.108036993 | 2.3886 | E9ANS8     | tr E9ANS8 E9ANS8_LEIMU | Proteasome subunit beta     | 2  |
| 4.734206294 | 2.3864 | E9AR37;E9A | tr E9AR37 E9AR37_LEIMU | Uncharacterized protein C   | 2  |
| 3.109355858 | 2.3749 | E9AP45     | tr E9AP45 E9AP45_LEIMU | SURF1-like protein OS=Lei   | 2  |
| 2.72099939  | 2.3744 | E9APE1     | tr E9APE1 E9APE1_LEIMU | Uncharacterized protein C   | 2  |
| 3.834271451 | 2.3675 | E9AYS3     | tr E9AYS3 E9AYS3_LEIMU | Uncharacterized protein O   | 2  |
| 3.914394171 | 2.3645 | E9AX53     | tr E9AX53 E9AX53_LEIMU | 40S ribosomal protein S8 (  | 6  |
| 4.102105235 | 2.362  | E9B047     | tr E9B047 E9B047_LEIMU | Putative glycosomal meml    | 5  |
| 4.699031338 | 2.3611 | E9AKY4;A7Y | tr E9AKY4 E9AKY4_LEIMU | Protein disulfide isomeras  | 6  |
| 4.31503506  | 2.3527 | E9B158     | tr E9B158 E9B158_LEIMU | Uncharacterized protein C   | 2  |
| 4.073984301 | 2.3507 | E9ARR3;E9A | tr E9ARR3 E9ARR3_LEIMU | Uncharacterized protein C   | 3  |
| 5.035155089 | 2.3461 | E9ALB7     | tr E9ALB7 E9ALB7_LEIMU | RNA binding protein-like p  | 2  |
| 3.857571748 | 2.3408 | E9B5F7     | tr E9B5F7 E9B5F7_LEIMU | Transmembrane 9 superfa     | 4  |

|             |        |            |                                                   |    |
|-------------|--------|------------|---------------------------------------------------|----|
| 2.865893882 | 2.3325 | E9AN91     | tr E9AN91 E9AN91_LEIMU Uncharacterized protein (  | 2  |
| 4.544497557 | 2.33   | E9APH2     | tr E9APH2 E9APH2_LEIMU Putative Ran-binding prot  | 3  |
| 4.299544501 | 2.3287 | E9B0T3     | tr E9B0T3 E9B0T3_LEIMU Uncharacterized protein O  | 2  |
| 4.595449214 | 2.3243 | E9AVK2     | tr E9AVK2 E9AVK2_LEIMU Uncharacterized protein (  | 2  |
| 2.780529322 | 2.32   | E9AMB3     | tr E9AMB3 E9AMB3_LEIMU Uncharacterized protein    | 2  |
| 4.190592091 | 2.3177 | E9APY1     | tr E9APY1 E9APY1_LEIMU Uncharacterized protein C  | 2  |
| 3.999283679 | 2.3169 | E9B3W5     | tr E9B3W5 E9B3W5_LEIMU Putative ABC transporte    | 2  |
| 4.808393556 | 2.3142 | E9B2E8     | tr E9B2E8 E9B2E8_LEIMU Uncharacterized protein O  | 10 |
| 4.571943547 | 2.3116 | E9B506;A7Y | tr E9B506 E9B506_LEIMU Uncharacterized protein C  | 2  |
| 3.92918048  | 2.3088 | E9AK24     | tr E9AK24 E9AK24_LEIMU Uncharacterized protein C  | 3  |
| 3.943984992 | 2.3063 | E9B4R2     | tr E9B4R2 E9B4R2_LEIMU Uncharacterized protein C  | 2  |
| 4.131502326 | 2.3033 | E9B428     | tr E9B428 E9B428_LEIMU Uncharacterized protein C  | 2  |
| 3.102496205 | 2.3022 | E9B065     | tr E9B065 E9B065_LEIMU Uncharacterized protein C  | 3  |
| 4.215895326 | 2.2998 | E9AJK7     | tr E9AJK7 E9AJK7_LEIMU Uncharacterized protein O  | 9  |
| 3.895416321 | 2.2988 | E9ATF6;E9A | tr E9ATF6 E9ATF6_LEIMU Putative 60S ribosomal pro | 2  |
| 4.57253755  | 2.2958 | E9B4N4     | tr E9B4N4 E9B4N4_LEIMU Proteasome regulatory nc   | 2  |
| 4.356931633 | 2.2921 | E9AMG3     | tr E9AMG3 E9AMG3_LEIMU DNA polymerase OS=Le       | 2  |
| 3.914653079 | 2.2918 | E9B466     | tr E9B466 E9B466_LEIMU Uncharacterized protein C  | 2  |
| 3.946613935 | 2.2836 | E9API4     | tr E9API4 E9API4_LEIMU Uncharacterized protein OS | 2  |
| 3.276929454 | 2.2831 | E9B444     | tr E9B444 E9B444_LEIMU Uncharacterized protein C  | 4  |
| 4.345817472 | 2.2797 | E9AVH9     | tr E9AVH9 E9AVH9_LEIMU Proteasome subunit alph    | 3  |
| 3.829987167 | 2.2776 | E9B4B3     | tr E9B4B3 E9B4B3_LEIMU Uncharacterized protein C  | 5  |
| 3.42388994  | 2.2736 | E9B2Y0     | tr E9B2Y0 E9B2Y0_LEIMU Uncharacterized protein O  | 2  |
| 4.282070247 | 2.2718 | E9AML1     | tr E9AML1 E9AML1_LEIMU Uncharacterized protein    | 6  |
| 2.601644272 | 2.2702 | E9ASV7     | tr E9ASV7 E9ASV7_LEIMU Putative DEAD box RNA he   | 2  |
| 4.013246028 | 2.2606 | E9AL77     | tr E9AL77 E9AL77_LEIMU Uncharacterized protein O  | 5  |
| 2.843807202 | 2.254  | E9AKA5     | tr E9AKA5 E9AKA5_LEIMU Uncharacterized protein (  | 3  |
| 4.60201836  | 2.2416 | E9AQE3     | tr E9AQE3 E9AQE3_LEIMU Putative ribosomal protei  | 2  |
| 3.381579468 | 2.2354 | E9APS4     | tr E9APS4 E9APS4_LEIMU Uncharacterized protein C  | 2  |
| 4.156463391 | 2.2302 | E9B3B3     | tr E9B3B3 E9B3B3_LEIMU Putative chaperone protei  | 2  |
| 3.691949672 | 2.23   | E9AXQ9     | tr E9AXQ9 E9AXQ9_LEIMU Putative 3-oxo-5-alpha-st  | 6  |
| 4.37610563  | 2.226  | E9ALL3     | tr E9ALL3 E9ALL3_LEIMU Uncharacterized protein O  | 4  |
| 4.008617839 | 2.2207 | E9B4H8     | tr E9B4H8 E9B4H8_LEIMU Putative adenylate kinase  | 6  |
| 4.070745688 | 2.2164 | E9APM2     | tr E9APM2 E9APM2_LEIMU Uncharacterized protein    | 2  |
| 3.897797181 | 2.2135 | E9B5N9     | tr E9B5N9 E9B5N9_LEIMU Uncharacterized protein (  | 8  |
| 4.133660863 | 2.2134 | E9AVH4     | tr E9AVH4 E9AVH4_LEIMU 40S ribosomal protein S6   | 5  |
| 4.114599306 | 2.2094 | E9B226     | tr E9B226 E9B226_LEIMU Putative 3,2-trans-enoyl-C | 5  |
| 4.28788069  | 2.2093 | E9AVL4     | tr E9AVL4 E9AVL4_LEIMU Uncharacterized protein C  | 12 |
| 4.096170899 | 2.2034 | E9B4K6     | tr E9B4K6 E9B4K6_LEIMU Uncharacterized protein (I | 2  |
| 3.628907029 | 2.1992 | E9AN97;Q9I | tr E9AN97 E9AN97_LEIMU Histone H3 OS=Leishmani    | 4  |
| 4.090034138 | 2.1976 | E9B630     | tr E9B630 E9B630_LEIMU Uncharacterized protein C  | 3  |
| 3.38587833  | 2.1932 | E9AT12;Q01 | tr E9AT12 E9AT12_LEIMU Glyceraldehyde-3-phosph    | 3  |
| 3.806243243 | 2.1927 | E9AYB0     | tr E9AYB0 E9AYB0_LEIMU Uncharacterized protein C  | 3  |
| 4.492908888 | 2.1909 | E9ALJ3     | tr E9ALJ3 E9ALJ3_LEIMU Enoyl-CoA hydratase/isome  | 2  |
| 3.238789856 | 2.1829 | E9ATTO     | tr E9ATTO E9ATTO_LEIMU Uncharacterized protein C  | 3  |
| 4.031439785 | 2.1829 | E9B126     | tr E9B126 E9B126_LEIMU Uncharacterized protein C  | 2  |
| 4.436419222 | 2.1802 | E9AKM1     | tr E9AKM1 E9AKM1_LEIMU V-type proton ATPase su    | 2  |
| 3.99554468  | 2.1789 | E9AKL1     | tr E9AKL1 E9AKL1_LEIMU Uncharacterized protein O  | 3  |
| 4.844753362 | 2.178  | E9AUR9     | tr E9AUR9 E9AUR9_LEIMU Uncharacterized protein (  | 2  |
| 3.75747327  | 2.1766 | E9AKU9     | tr E9AKU9 E9AKU9_LEIMU Uncharacterized protein (  | 6  |

|             |        |            |                                                   |    |
|-------------|--------|------------|---------------------------------------------------|----|
| 3.998109209 | 2.1758 | E9AQW6     | tr E9AQW6 E9AQW6_LEIMU Putative endoplasmic r     | 2  |
| 2.816064869 | 2.1755 | E9ARR2     | tr E9ARR2 E9ARR2_LEIMU Uncharacterized protein C  | 2  |
| 4.128742675 | 2.1751 | E9B5K8     | tr E9B5K8 E9B5K8_LEIMU Uncharacterized protein C  | 7  |
| 3.996561301 | 2.1732 | E9ANC1     | tr E9ANC1 E9ANC1_LEIMU Uncharacterized protein C  | 2  |
| 3.851506975 | 2.1719 | E9AVE9     | tr E9AVE9 E9AVE9_LEIMU Uncharacterized protein C  | 2  |
| 3.499149844 | 2.1697 | E9AQK4     | tr E9AQK4 E9AQK4_LEIMU Putative 60S ribosomal p   | 5  |
| 4.167517234 | 2.1685 | E9AWT2     | tr E9AWT2 E9AWT2_LEIMU DNA helicase OS=Leishm     | 3  |
| 3.795604188 | 2.1665 | E9AU24     | tr E9AU24 E9AU24_LEIMU Uncharacterized protein C  | 7  |
| 3.713701782 | 2.1606 | E9ATC9     | tr E9ATC9 E9ATC9_LEIMU Uncharacterized protein C  | 2  |
| 4.454048994 | 2.1577 | E9AW08     | tr E9AW08 E9AW08_LEIMU Uncharacterized protein    | 10 |
| 3.818318777 | 2.1554 | E9B6X6     | tr E9B6X6 E9B6X6_LEIMU Uncharacterized protein C  | 2  |
| 4.264262498 | 2.1536 | E9ANG0     | tr E9ANG0 E9ANG0_LEIMU Uncharacterized protein    | 3  |
| 3.628248076 | 2.1532 | E9ALP0     | tr E9ALP0 E9ALP0_LEIMU Uncharacterized protein O  | 3  |
| 4.256730281 | 2.1523 | E9AKF5     | tr E9AKF5 E9AKF5_LEIMU Uncharacterized protein C  | 5  |
| 3.929262141 | 2.1494 | E9B665     | tr E9B665 E9B665_LEIMU Putative 60S ribosomal pr  | 5  |
| 3.957653074 | 2.1481 | E9B3A9     | tr E9B3A9 E9B3A9_LEIMU Glucosamine-6-phosphate    | 2  |
| 4.232415818 | 2.1406 | E9AWU9     | tr E9AWU9 E9AWU9_LEIMU Putative DNAJ domain p     | 2  |
| 4.174776079 | 2.1369 | E9AUE8     | tr E9AUE8 E9AUE8_LEIMU Uncharacterized protein C  | 3  |
| 4.131583488 | 2.1355 | E9AS15     | tr E9AS15 E9AS15_LEIMU Putative histone H3 varian | 2  |
| 4.34250683  | 2.1333 | V5RIA5;E9A | tr V5RIA5 V5RIA5_LEIAM Calmodulin-like protein OS | 2  |
| 3.84328802  | 2.1315 | E9B617     | tr E9B617 E9B617_LEIMU Mitochondrial processing   | 11 |
| 2.433476208 | 2.1286 | E9ASP4     | tr E9ASP4 E9ASP4_LEIMU Uncharacterized protein C  | 2  |
| 4.627463113 | 2.128  | E9AL16     | tr E9AL16 E9AL16_LEIMU Putative cytochrome c1, h  | 4  |
| 3.827506172 | 2.1271 | E9AWS6;A0, | tr E9AWS6 E9AWS6_LEIMU Triosephosphate isomer     | 2  |
| 4.631641669 | 2.1245 | E9ASS9     | tr E9ASS9 E9ASS9_LEIMU Uncharacterized protein O  | 2  |
| 3.688647562 | 2.1222 | E9AP80;E9A | tr E9AP80 E9AP80_LEIMU Putative 60S ribosomal pr  | 2  |
| 4.32471427  | 2.1219 | E9AX30     | tr E9AX30 E9AX30_LEIMU Hypothetical predicted m   | 3  |
| 3.41376112  | 2.1207 | E9AYE1     | tr E9AYE1 E9AYE1_LEIMU Phosphatidate cytidyltra   | 2  |
| 4.325498844 | 2.1201 | E9ARZ1     | tr E9ARZ1 E9ARZ1_LEIMU Putative 40S ribosomal pr  | 3  |
| 3.722933508 | 2.1171 | E9AUC8     | tr E9AUC8 E9AUC8_LEIMU Uncharacterized protein C  | 4  |
| 3.646873293 | 2.1131 | E9AQD7     | tr E9AQD7 E9AQD7_LEIMU Putative mismatch repai    | 3  |
| 4.121833834 | 2.1121 | E9AXM2     | tr E9AXM2 E9AXM2_LEIMU Uncharacterized protein    | 2  |
| 3.037657575 | 2.1109 | E9B2V2     | tr E9B2V2 E9B2V2_LEIMU Uncharacterized protein C  | 4  |
| 4.198362774 | 2.1099 | E9ASB9     | tr E9ASB9 E9ASB9_LEIMU Histone H4 OS=Leishmani    | 3  |
| 4.12575727  | 2.1043 | E9B649     | tr E9B649 E9B649_LEIMU Uncharacterized protein C  | 2  |
| 2.810970709 | 2.1025 | E9ANM2;E9  | tr E9ANM2 E9ANM2_LEIMU Putative 40S ribosomal     | 2  |
| 3.865177739 | 2.1002 | E9B6Q4     | tr E9B6Q4 E9B6Q4_LEIMU Putative 60S ribosomal pr  | 3  |
| 4.553048686 | 2.0982 | E9AY47     | tr E9AY47 E9AY47_LEIMU Uncharacterized protein C  | 2  |
| 3.982956974 | 2.0943 | E9AYW6     | tr E9AYW6 E9AYW6_LEIMU Uncharacterized protein    | 3  |
| 3.144320955 | 2.0939 | E9B263     | tr E9B263 E9B263_LEIMU 2-oxoglutarate dehydroge   | 3  |
| 3.678995228 | 2.0939 | E9AQK9     | tr E9AQK9 E9AQK9_LEIMU Uncharacterized protein C  | 2  |
| 4.950722902 | 2.0936 | E9ALJ0     | tr E9ALJ0 E9ALJ0_LEIMU Uncharacterized protein OS | 2  |
| 3.839562558 | 2.092  | E9AR74     | tr E9AR74 E9AR74_LEIMU Uncharacterized protein C  | 5  |
| 3.56386285  | 2.0919 | E9AN94     | tr E9AN94 E9AN94_LEIMU Uncharacterized protein C  | 2  |
| 3.52647071  | 2.0918 | E9APS3     | tr E9APS3 E9APS3_LEIMU Uncharacterized protein C  | 3  |
| 3.704610099 | 2.0918 | E9ALL1     | tr E9ALL1 E9ALL1_LEIMU Uncharacterized protein O  | 2  |
| 3.84353383  | 2.0895 | E9ASN7     | tr E9ASN7 E9ASN7_LEIMU Uncharacterized protein C  | 4  |
| 3.987546439 | 2.0885 | E9AMK8     | tr E9AMK8 E9AMK8_LEIMU Putative RNA helicase O    | 5  |
| 4.291995229 | 2.0847 | E9AJT5     | tr E9AJT5 E9AJT5_LEIMU Uncharacterized protein O  | 5  |
| 2.800227596 | 2.0843 | E9AR16     | tr E9AR16 E9AR16_LEIMU Uncharacterized protein C  | 2  |

|             |        |            |                                                     |    |
|-------------|--------|------------|-----------------------------------------------------|----|
| 4.44944402  | 2.0798 | E9AJU4     | tr E9AJU4 E9AJU4_LEIMU Kinase-like protein OS=Leish | 2  |
| 3.832819516 | 2.0777 | E9B6Y0     | tr E9B6Y0 E9B6Y0_LEIMU Uncharacterized protein O    | 3  |
| 3.296319082 | 2.0704 | E9AKC2     | tr E9AKC2 E9AKC2_LEIMU Dihydrolipoamide acetyltr    | 4  |
| 4.001846453 | 2.0695 | Q867J9;E9A | tr Q867J9 Q867J9_LEIME Histone H2A OS=Leishmani     | 2  |
| 4.51256507  | 2.0689 | E9APV6     | tr E9APV6 E9APV6_LEIMU Putative kinesin K39 OS=L    | 5  |
| 3.989325665 | 2.0684 | E9AVG7     | tr E9AVG7 E9AVG7_LEIMU Putative cytochrome c ox     | 7  |
| 3.220781209 | 2.0644 | E9B602     | tr E9B602 E9B602_LEIMU Putative short chain dehy    | 3  |
| 4.016250044 | 2.0643 | E9AM47     | tr E9AM47 E9AM47_LEIMU Uncharacterized protein      | 4  |
| 4.514576459 | 2.0636 | E9APB2     | tr E9APB2 E9APB2_LEIMU Uncharacterized protein C    | 2  |
| 3.91699857  | 2.0635 | E9AT08     | tr E9AT08 E9AT08_LEIMU Uncharacterized protein C    | 2  |
| 3.931560641 | 2.0632 | E9AKR8     | tr E9AKR8 E9AKR8_LEIMU Putative 60S ribosomal pr    | 2  |
| 3.805733545 | 2.0629 | E9AYQ6     | tr E9AYQ6 E9AYQ6_LEIMU CAAX prenyl protease OS=     | 4  |
| 4.096309185 | 2.0627 | E9AL39     | tr E9AL39 E9AL39_LEIMU Uncharacterized protein O    | 3  |
| 5.001073779 | 2.0624 | E9ATE1     | tr E9ATE1 E9ATE1_LEIMU Uncharacterized protein C    | 3  |
| 4.469088794 | 2.06   | E9ART6     | tr E9ART6 E9ART6_LEIMU Plasma membrane ATPase       | 7  |
| 3.948021999 | 2.0586 | E9B6X2     | tr E9B6X2 E9B6X2_LEIMU Putative mitochondrial ph    | 6  |
| 4.413228259 | 2.0558 | E9ARF8     | tr E9ARF8 E9ARF8_LEIMU Uncharacterized protein C    | 9  |
| 4.044783833 | 2.0532 | E9AJY0     | tr E9AJY0 E9AJY0_LEIMU Uncharacterized protein O    | 3  |
| 4.203995033 | 2.0519 | E9AVP7     | tr E9AVP7 E9AVP7_LEIMU Uncharacterized protein C    | 4  |
| 3.217573343 | 2.0517 | E9B0Y3     | tr E9B0Y3 E9B0Y3_LEIMU Uncharacterized protein O    | 5  |
| 3.780525796 | 2.0503 | E9AZ76     | tr E9AZ76 E9AZ76_LEIMU Uncharacterized protein C    | 2  |
| 3.614258219 | 2.0493 | E9B4C7     | tr E9B4C7 E9B4C7_LEIMU Uncharacterized protein C    | 2  |
| 3.40837376  | 2.0474 | E9AL69     | tr E9AL69 E9AL69_LEIMU Uncharacterized protein O    | 3  |
| 3.611987864 | 2.0465 | E9AKR1     | tr E9AKR1 E9AKR1_LEIMU Uncharacterized protein C    | 2  |
| 4.664581793 | 2.0464 | E9B0M2     | tr E9B0M2 E9B0M2_LEIMU Uncharacterized protein      | 2  |
| 3.161131598 | 2.046  | E8NHJ5;E9A | tr E8NHJ5 E8NHJ5_LEIMU WGS CADB00000000 data        | 8  |
| 3.567617274 | 2.0448 | E9B304     | tr E9B304 E9B304_LEIMU RNA helicase OS=Leishma      | 3  |
| 4.011371587 | 2.0446 | E9AVW4     | tr E9AVW4 E9AVW4_LEIMU Uncharacterized proteir      | 12 |
| 3.229314466 | 2.0425 | E9B127     | tr E9B127 E9B127_LEIMU Uncharacterized protein C    | 2  |
| 3.476885954 | 2.0425 | E9AXA9     | tr E9AXA9 E9AXA9_LEIMU Uncharacterized protein C    | 2  |
| 4.19375771  | 2.0422 | E9APT4     | tr E9APT4 E9APT4_LEIMU Uncharacterized protein C    | 2  |
| 3.990358644 | 2.0414 | E9APM4     | tr E9APM4 E9APM4_LEIMU Proteasome subunit alpl      | 2  |
| 4.105219775 | 2.0399 | E9AQY7     | tr E9AQY7 E9AQY7_LEIMU Uncharacterized protein C    | 6  |
| 4.110552588 | 2.039  | E9AK06     | tr E9AK06 E9AK06_LEIMU Uncharacterized protein C    | 2  |
| 3.866992602 | 2.0362 | E9B6G8     | tr E9B6G8 E9B6G8_LEIMU Uncharacterized protein C    | 3  |
| 4.184908937 | 2.0351 | E9AKX9     | tr E9AKX9 E9AKX9_LEIMU Uncharacterized protein C    | 2  |
| 4.353075534 | 2.0336 | E9B376;A0A | tr E9B376 E9B376_LEIMU Nucleoside diphosphate ki    | 5  |
| 2.824660203 | 2.0328 | E9AUZ6     | tr E9AUZ6 E9AUZ6_LEIMU Uncharacterized protein C    | 2  |
| 3.999944024 | 2.0315 | E9B0N9     | tr E9B0N9 E9B0N9_LEIMU Putative DREV methyltrar     | 2  |
| 3.571762582 | 2.0294 | E9ANW6     | tr E9ANW6 E9ANW6_LEIMU Uncharacterized proteir      | 2  |
| 4.233999471 | 2.029  | E9B2E1     | tr E9B2E1 E9B2E1_LEIMU Uncharacterized protein O    | 2  |
| 3.86772471  | 2.029  | E9B0I4     | tr E9B0I4 E9B0I4_LEIMU Uncharacterized protein OS   | 2  |
| 3.607624609 | 2.0287 | E9ANG4     | tr E9ANG4 E9ANG4_LEIMU Uncharacterized protein      | 2  |
| 4.338775578 | 2.0221 | E9AQ06     | tr E9AQ06 E9AQ06_LEIMU Heat shock protein HslVU     | 9  |
| 4.148760223 | 2.0217 | E9ATD2;E9B | tr E9ATD2 E9ATD2_LEIMU Putative polyubiquitin (Fr   | 2  |
| 3.909441145 | 2.0203 | E9AW66     | tr E9AW66 E9AW66_LEIMU Uncharacterized protein      | 2  |
| 4.152715891 | 2.0191 | E9B5K2     | tr E9B5K2 E9B5K2_LEIMU Uncharacterized protein C    | 5  |
| 3.571432461 | 2.019  | E9AQR6     | tr E9AQR6 E9AQR6_LEIMU Uncharacterized protein      | 2  |
| 4.003705417 | 2.0183 | E9ASL7     | tr E9ASL7 E9ASL7_LEIMU Uncharacterized protein O    | 2  |
| 4.441571883 | 2.0166 | E9B370     | tr E9B370 E9B370_LEIMU Uncharacterized protein C    | 2  |

|             |        |            |                                                     |    |
|-------------|--------|------------|-----------------------------------------------------|----|
| 3.741484283 | 2.0157 | E9ATG0     | tr E9ATG0 E9ATG0_LEIMU Uncharacterized protein C    | 2  |
| 4.082090313 | 2.0107 | E9B2L1     | tr E9B2L1 E9B2L1_LEIMU Phenylalanyl-tRNA synthet    | 6  |
| 3.797273095 | 2.0104 | E9B429     | tr E9B429 E9B429_LEIMU Uncharacterized protein C    | 2  |
| 4.606777904 | 2.0088 | E9ATU7     | tr E9ATU7 E9ATU7_LEIMU Uncharacterized protein C    | 3  |
| 3.719999843 | 2.0086 | E9ATN6     | tr E9ATN6 E9ATN6_LEIMU Uncharacterized protein C    | 7  |
| 3.693298864 | 2.008  | E9ANM9     | tr E9ANM9 E9ANM9_LEIMU Uncharacterized protein C    | 4  |
| 4.157378496 | 2.0057 | E9B1H3     | tr E9B1H3 E9B1H3_LEIMU Uncharacterized protein C    | 11 |
| 3.935992299 | 2.005  | E9AJR0     | tr E9AJR0 E9AJR0_LEIMU Putative ribosomal protein   | 3  |
| 3.492795064 | 2.0043 | E9AUV2     | tr E9AUV2 E9AUV2_LEIMU Uncharacterized protein      | 3  |
| 3.345361633 | 2.0042 | E9ASK1     | tr E9ASK1 E9ASK1_LEIMU Uncharacterized protein C    | 4  |
| 3.687388643 | 2.0037 | E9AKX0     | tr E9AKX0 E9AKX0_LEIMU Uncharacterized protein C    | 2  |
| 3.053425998 | 2.0036 | E9B4M8     | tr E9B4M8 E9B4M8_LEIMU Uncharacterized protein      | 2  |
| 3.792545682 | 2.0027 | E9B052     | tr E9B052 E9B052_LEIMU Eukaryotic translation initi | 11 |
| 4.45145847  | 2.0022 | E9B6H7     | tr E9B6H7 E9B6H7_LEIMU Putative chaperone prote     | 7  |
| 4.024819927 | 2.0015 | E9AK81     | tr E9AK81 E9AK81_LEIMU Uncharacterized protein C    | 2  |
| 5.04986212  | 2.0013 | E9APR1     | tr E9APR1 E9APR1_LEIMU Elongation of fatty acids p  | 2  |
| 3.683190177 | 2.001  | E9B2P1     | tr E9B2P1 E9B2P1_LEIMU Elongation of fatty acids p  | 2  |
| 4.12605236  | 2.0009 | E9B027     | tr E9B027 E9B027_LEIMU Threonylcarbamoyl-AMP s      | 3  |
| 4.274744143 | 1.9986 | E9B3A4     | tr E9B3A4 E9B3A4_LEIMU Uncharacterized protein C    | 3  |
| 3.808172651 | 1.9978 | E9AN60     | tr E9AN60 E9AN60_LEIMU Uncharacterized protein C    | 4  |
| 4.076755345 | 1.9976 | E9AV01     | tr E9AV01 E9AV01_LEIMU Mitochondrial processing     | 13 |
| 4.068526693 | 1.9952 | E9B0W0     | tr E9B0W0 E9B0W0_LEIMU Adenylate kinase isoenz      | 2  |
| 4.615063911 | 1.995  | E9ARE6     | tr E9ARE6 E9ARE6_LEIMU Putative alpha glucosidase   | 6  |
| 3.659895971 | 1.994  | E9B3Z9     | tr E9B3Z9 E9B3Z9_LEIMU Uncharacterized protein O    | 4  |
| 3.864227326 | 1.9922 | E9AVW9     | tr E9AVW9 E9AVW9_LEIMU Intraflagellar transport p   | 5  |
| 4.196271476 | 1.9921 | E9ATV2     | tr E9ATV2 E9ATV2_LEIMU Putative aldehyde dehydr     | 8  |
| 3.46317233  | 1.9921 | E9AKQ0     | tr E9AKQ0 E9AKQ0_LEIMU Uncharacterized protein C    | 5  |
| 3.467075565 | 1.9886 | E9B3Y5     | tr E9B3Y5 E9B3Y5_LEIMU Uncharacterized protein O    | 3  |
| 3.988109703 | 1.9882 | E9B533;E9A | tr E9B533 E9B533_LEIMU Putative ribosomal protein   | 5  |
| 3.811144396 | 1.986  | E9AKG6     | tr E9AKG6 E9AKG6_LEIMU Uncharacterized protein C    | 2  |
| 3.466898421 | 1.9844 | E9AKB0     | tr E9AKB0 E9AKB0_LEIMU Putative major vault prote   | 4  |
| 3.48902142  | 1.9838 | E9B2I5     | tr E9B2I5 E9B2I5_LEIMU Uncharacterized protein OS   | 2  |
| 3.750541875 | 1.9838 | E9AQ98     | tr E9AQ98 E9AQ98_LEIMU Putative succinate dehyd     | 3  |
| 3.86492979  | 1.9837 | Q7Z031;E9A | tr Q7Z031 Q7Z031_LEIAM Acidocalcisomal pyrophos     | 5  |
| 3.996669918 | 1.9836 | E9AV86     | tr E9AV86 E9AV86_LEIMU Putative dynein arm light    | 4  |
| 3.729677873 | 1.9832 | E9AZL7     | tr E9AZL7 E9AZL7_LEIMU Uncharacterized protein O    | 3  |
| 4.128908196 | 1.9829 | E9AJD6     | tr E9AJD6 E9AJD6_LEIMU Putative long-chain-fatty-a  | 2  |
| 3.472056986 | 1.9829 | E9B5G2     | tr E9B5G2 E9B5G2_LEIMU Uncharacterized protein C    | 2  |
| 3.885382464 | 1.9829 | E9AUD3     | tr E9AUD3 E9AUD3_LEIMU Uncharacterized protein      | 3  |
| 3.680041331 | 1.982  | E9AXC1     | tr E9AXC1 E9AXC1_LEIMU Putative transcription fact  | 2  |
| 4.17858307  | 1.981  | E9AYS1     | tr E9AYS1 E9AYS1_LEIMU Proteasome endopeptidas      | 3  |
| 4.581839308 | 1.9803 | E9AQB1     | tr E9AQB1 E9AQB1_LEIMU 60S acidic ribosomal prot    | 2  |
| 3.523367481 | 1.9785 | E9AWY9     | tr E9AWY9 E9AWY9_LEIMU Uncharacterized protein      | 2  |
| 3.483113917 | 1.9767 | E9ALG5     | tr E9ALG5 E9ALG5_LEIMU Uncharacterized protein C    | 2  |
| 4.349734376 | 1.9757 | E9APB1     | tr E9APB1 E9APB1_LEIMU Mitochondrial processing     | 9  |
| 4.19405473  | 1.9752 | E9AW71     | tr E9AW71 E9AW71_LEIMU Kinesin-like protein OS=     | 4  |
| 3.360635127 | 1.9751 | E9AYI3     | tr E9AYI3 E9AYI3_LEIMU Uncharacterized protein OS   | 2  |
| 4.001606945 | 1.9744 | E9AXP1     | tr E9AXP1 E9AXP1_LEIMU Uncharacterized protein C    | 6  |
| 4.069564502 | 1.9733 | E9AKY9     | tr E9AKY9 E9AKY9_LEIMU Uncharacterized protein C    | 4  |
| 4.218390116 | 1.973  | E9B2Q3     | tr E9B2Q3 E9B2Q3_LEIMU Putative RNA polymerase      | 2  |

|             |        |                                    |                             |    |
|-------------|--------|------------------------------------|-----------------------------|----|
| 3.852677976 | 1.9711 | E9AWN5;E9 tr E9AWN5 E9AWN5_LEIMU   | Uncharacterized protein     | 4  |
| 3.913505807 | 1.971  | E9ANQ3;C7I tr E9ANQ3 E9ANQ3_LEIMU  | Putative lanosterol 14-al   | 9  |
| 3.426989922 | 1.9703 | E9B584 tr E9B584 E9B584_LEIMU      | Uncharacterized protein C   | 4  |
| 4.164929346 | 1.9702 | E9AUE0 tr E9AUE0 E9AUE0_LEIMU      | DNA-directed RNA polym      | 3  |
| 4.130217693 | 1.9701 | E9AQB0 tr E9AQB0 E9AQB0_LEIMU      | Uncharacterized protein     | 2  |
| 3.614521377 | 1.9699 | E9ASJ1 tr E9ASJ1 E9ASJ1_LEIMU      | Uncharacterized protein OS  | 2  |
| 2.981775734 | 1.9695 | E9B1J8;E8NI tr E9B1J8 E9B1J8_LEIMU | Uncharacterized protein OS  | 2  |
| 3.848445878 | 1.9693 | E9B6K4 tr E9B6K4 E9B6K4_LEIMU      | Putative replication factor | 4  |
| 4.351910502 | 1.9692 | E9B334 tr E9B334 E9B334_LEIMU      | Putative AMP deaminase (    | 2  |
| 4.068756873 | 1.9692 | E9B443 tr E9B443 E9B443_LEIMU      | Uncharacterized protein C   | 2  |
| 3.90778376  | 1.9673 | E9B033 tr E9B033 E9B033_LEIMU      | Putative cullin 2 OS=Leishr | 2  |
| 3.509167772 | 1.9672 | E9B3U1;E9A tr E9B3U1 E9B3U1_LEIMU  | Uncharacterized protein (   | 7  |
| 3.407127398 | 1.9669 | E9AX23 tr E9AX23 E9AX23_LEIMU      | Fatty acid transporter pro  | 3  |
| 4.525267726 | 1.9651 | E9ARZ6 tr E9ARZ6 E9ARZ6_LEIMU      | Putative nucleosome asse    | 8  |
| 4.115208646 | 1.965  | E9ATB7 tr E9ATB7 E9ATB7_LEIMU      | Uncharacterized protein C   | 3  |
| 3.190787311 | 1.9643 | E9B3P3 tr E9B3P3 E9B3P3_LEIMU      | Uncharacterized protein C   | 3  |
| 3.159400852 | 1.9642 | E9AV99 tr E9AV99 E9AV99_LEIMU      | Uncharacterized protein C   | 2  |
| 3.728619974 | 1.9642 | E9B5H5 tr E9B5H5 E9B5H5_LEIMU      | Uncharacterized protein C   | 2  |
| 3.683578381 | 1.9622 | E9ALI5;E9AL tr E9ALI5 E9ALI5_LEIMU | Putative kinesin OS=Leishm: | 4  |
| 3.86500779  | 1.9597 | E9AT49 tr E9AT49 E9AT49_LEIMU      | Putative mitochondrial AT   | 3  |
| 3.919278633 | 1.9589 | E9AWB2 tr E9AWB2 E9AWB2_LEIMU      | Uncharacterized proteir     | 3  |
| 4.438073276 | 1.9573 | E9AT16;E9A tr E9AT16 E9AT16_LEIMU  | Methyltransferase OS=Lei:   | 10 |
| 4.028066583 | 1.9572 | E9AJG4 tr E9AJG4 E9AJG4_LEIMU      | Uncharacterized protein O   | 20 |
| 3.987311579 | 1.957  | E9B4H3 tr E9B4H3 E9B4H3_LEIMU      | Putative ascorbate-depen    | 2  |
| 3.812711672 | 1.9567 | E9B4M5 tr E9B4M5 E9B4M5_LEIMU      | Uncharacterized protein     | 3  |
| 3.718686823 | 1.9566 | E9AZB2 tr E9AZB2 E9AZB2_LEIMU      | Uncharacterized protein C   | 3  |
| 4.438517671 | 1.9566 | E9B369 tr E9B369 E9B369_LEIMU      | Uncharacterized protein C   | 2  |
| 3.436316905 | 1.9566 | E9B465 tr E9B465 E9B465_LEIMU      | Glycosyl hydrolase-like pro | 2  |
| 3.776895065 | 1.9565 | E9AW42 tr E9AW42 E9AW42_LEIMU      | ABC transporter-like pro    | 3  |
| 4.031229284 | 1.9559 | E9AKK2 tr E9AKK2 E9AKK2_LEIMU      | Dipeptidyl peptidase 3 OS   | 4  |
| 4.309670069 | 1.9547 | E9ANK4 tr E9ANK4 E9ANK4_LEIMU      | 3-methylcrotonoyl-CoA c     | 3  |
| 3.999507849 | 1.9542 | E9B686 tr E9B686 E9B686_LEIMU      | Putative calcium motive P-  | 6  |
| 3.852182854 | 1.954  | E9AMX7 tr E9AMX7 E9AMX7_LEIMU      | Uncharacterized protein     | 2  |
| 4.293974621 | 1.9524 | E9AS80 tr E9AS80 E9AS80_LEIMU      | Uncharacterized protein C   | 3  |
| 3.685958134 | 1.9517 | E9B041 tr E9B041 E9B041_LEIMU      | Uncharacterized protein C   | 5  |
| 3.46068181  | 1.9516 | E9B2B1 tr E9B2B1 E9B2B1_LEIMU      | Uncharacterized protein C   | 5  |
| 3.622411695 | 1.9509 | E9ASW0 tr E9ASW0 E9ASW0_LEIMU      | Uncharacterized protein     | 3  |
| 4.054963314 | 1.9501 | E9AQA3 tr E9AQA3 E9AQA3_LEIMU      | Tryparedoxin peroxidase     | 2  |
| 3.586697844 | 1.9498 | E9B5X9 tr E9B5X9 E9B5X9_LEIMU      | Uncharacterized protein C   | 2  |
| 4.372749205 | 1.9495 | E9B5N2 tr E9B5N2 E9B5N2_LEIMU      | Cell differentiation protei | 7  |
| 3.84034216  | 1.9487 | E9AVY4 tr E9AVY4 E9AVY4_LEIMU      | Putative 40S ribosomal pr   | 2  |
| 3.313266739 | 1.9486 | E9ATF7 tr E9ATF7 E9ATF7_LEIMU      | Putative 40S ribosomal pro  | 3  |
| 4.018545506 | 1.9471 | E9AUV5 tr E9AUV5 E9AUV5_LEIMU      | Uncharacterized protein     | 2  |
| 3.786961466 | 1.9471 | E9AYD3 tr E9AYD3 E9AYD3_LEIMU      | Uncharacterized protein C   | 2  |
| 3.46978413  | 1.9458 | E9AJN6 tr E9AJN6 E9AJN6_LEIMU      | Putative peptidyl dipeptidi | 3  |
| 4.043144701 | 1.9453 | E9AZC8 tr E9AZC8 E9AZC8_LEIMU      | Putative ribosomal proteir  | 2  |
| 3.682215889 | 1.9452 | E9B5M2 tr E9B5M2 E9B5M2_LEIMU      | Defective in cullin neddy   | 2  |
| 4.352069006 | 1.9448 | E9AQI6 tr E9AQI6 E9AQI6_LEIMU      | Putative proteasome 26S r   | 4  |
| 3.257653754 | 1.9438 | E9B0U3 tr E9B0U3 E9B0U3_LEIMU      | Putative small GTP-bindin   | 2  |
| 3.980581719 | 1.9436 | E9ANY7 tr E9ANY7 E9ANY7_LEIMU      | Uncharacterized protein C   | 2  |

|             |        |            |                        |                             |    |
|-------------|--------|------------|------------------------|-----------------------------|----|
| 3.828729688 | 1.9434 | E9AQV3     | tr E9AQV3 E9AQV3_LEIMU | Uncharacterized protein     | 5  |
| 3.433563234 | 1.943  | E9B013     | tr E9B013 E9B013_LEIMU | Uncharacterized protein C   | 2  |
| 4.27193826  | 1.9425 | E9B4S1;Q9X | tr E9B4S1 E9B4S1_LEIMU | p-glycoprotein OS=Leishm    | 9  |
| 3.772357027 | 1.9423 | E9AKC3     | tr E9AKC3 E9AKC3_LEIMU | Uncharacterized protein C   | 2  |
| 4.082258986 | 1.9421 | E9AXP4     | tr E9AXP4 E9AXP4_LEIMU | Uncharacterized protein C   | 3  |
| 5.267129153 | 1.942  | E9AP69     | tr E9AP69 E9AP69_LEIMU | Uncharacterized protein C   | 6  |
| 5.105429599 | 1.942  | E9AM16     | tr E9AM16 E9AM16_LEIMU | Putative ABC transporte     | 4  |
| 4.150193947 | 1.9415 | E9B6R2     | tr E9B6R2 E9B6R2_LEIMU | Proteasome subunit beta     | 2  |
| 4.130103383 | 1.9408 | E9AS57     | tr E9AS57 E9AS57_LEIMU | Uncharacterized protein C   | 4  |
| 4.140190489 | 1.9399 | E9AV21     | tr E9AV21 E9AV21_LEIMU | Putative Ia RNA binding p   | 2  |
| 3.645101404 | 1.9397 | E9AJR2     | tr E9AJR2 E9AJR2_LEIMU | Uncharacterized protein O   | 2  |
| 3.647784363 | 1.9395 | E9ANC5     | tr E9ANC5 E9ANC5_LEIMU | Uncharacterized protein C   | 2  |
| 4.056111968 | 1.9392 | E9AKL7     | tr E9AKL7 E9AKL7_LEIMU | Uncharacterized protein C   | 2  |
| 3.492588964 | 1.9389 | E9B2D4     | tr E9B2D4 E9B2D4_LEIMU | Uncharacterized protein C   | 5  |
| 3.502300765 | 1.9382 | E9B1R1     | tr E9B1R1 E9B1R1_LEIMU | Putative monoglyceride liq  | 2  |
| 4.261537649 | 1.938  | E9AM67     | tr E9AM67 E9AM67_LEIMU | Proteasome regulatory r     | 13 |
| 3.084460071 | 1.9378 | E9B0E3     | tr E9B0E3 E9B0E3_LEIMU | Uncharacterized protein C   | 3  |
| 3.610624057 | 1.9375 | E9AWK5     | tr E9AWK5 E9AWK5_LEIMU | Uncharacterized protein     | 2  |
| 3.682257499 | 1.9371 | E9AJY9     | tr E9AJY9 E9AJY9_LEIMU | Uncharacterized protein O   | 2  |
| 3.926803904 | 1.9365 | E9B430     | tr E9B430 E9B430_LEIMU | Putative phosphoribosylp    | 2  |
| 3.856495755 | 1.9351 | E9B3J3     | tr E9B3J3 E9B3J3_LEIMU | Uncharacterized protein O   | 2  |
| 4.063784579 | 1.9338 | E9AX57     | tr E9AX57 E9AX57_LEIMU | Uncharacterized protein C   | 5  |
| 3.397811346 | 1.9329 | E9B5Y8     | tr E9B5Y8 E9B5Y8_LEIMU | Uncharacterized protein C   | 2  |
| 3.777211076 | 1.9328 | E9B099;Q07 | tr E9B099 E9B099_LEIMU | Putative heat-shock protei  | 28 |
| 4.383714417 | 1.9309 | E9ASL3     | tr E9ASL3 E9ASL3_LEIMU | Putative 40S ribosomal prc  | 10 |
| 3.441000758 | 1.9305 | E9B415     | tr E9B415 E9B415_LEIMU | Uncharacterized protein C   | 3  |
| 4.357765589 | 1.9285 | E9AZ71     | tr E9AZ71 E9AZ71_LEIMU | Uncharacterized protein C   | 4  |
| 4.156489964 | 1.9269 | E9ATJ9     | tr E9ATJ9 E9ATJ9_LEIMU | Uncharacterized protein O   | 4  |
| 3.939306188 | 1.9269 | E9B0F9     | tr E9B0F9 E9B0F9_LEIMU | Kinesin-like protein OS=Lei | 4  |
| 3.670997013 | 1.9267 | E9AZY3     | tr E9AZY3 E9AZY3_LEIMU | Uncharacterized protein C   | 3  |
| 4.345779399 | 1.9265 | E9B3B7     | tr E9B3B7 E9B3B7_LEIMU | Uncharacterized protein C   | 4  |
| 3.96120559  | 1.9256 | E9AQU9     | tr E9AQU9 E9AQU9_LEIMU | Putative ADP-ribosylatio    | 4  |
| 3.8722981   | 1.9246 | E9B2U9     | tr E9B2U9 E9B2U9_LEIMU | Coatomer subunit epsilon    | 4  |
| 5.261912638 | 1.924  | E9B1M5     | tr E9B1M5 E9B1M5_LEIMU | Uncharacterized protein     | 2  |
| 4.025435387 | 1.9233 | E9AUX9     | tr E9AUX9 E9AUX9_LEIMU | DNA topoisomerase 1A O      | 2  |
| 4.071803825 | 1.9225 | E9APW9     | tr E9APW9 E9APW9_LEIMU | Uncharacterized protein     | 6  |
| 3.067424124 | 1.922  | E9AQI7     | tr E9AQI7 E9AQI7_LEIMU | Uncharacterized protein C   | 2  |
| 3.909985719 | 1.9216 | E9B1E9     | tr E9B1E9 E9B1E9_LEIMU | Putative 5-methyltetrahyd   | 4  |
| 3.981164173 | 1.9213 | E9ALU6     | tr E9ALU6 E9ALU6_LEIMU | Putative ATP-dependent C    | 12 |
| 3.689598131 | 1.921  | E9AZ79     | tr E9AZ79 E9AZ79_LEIMU | Uncharacterized protein C   | 2  |
| 3.637347532 | 1.9209 | E9AR29     | tr E9AR29 E9AR29_LEIMU | Putative P-type ATPase O    | 8  |
| 3.47368537  | 1.9208 | E9AP56     | tr E9AP56 E9AP56_LEIMU | Putative small Rab GTP bir  | 2  |
| 3.987116117 | 1.9202 | E9AK89     | tr E9AK89 E9AK89_LEIMU | Uncharacterized protein C   | 4  |
| 4.060525422 | 1.919  | E9AZG1     | tr E9AZG1 E9AZG1_LEIMU | Uncharacterized protein C   | 2  |
| 4.202249078 | 1.9189 | E9B5D9     | tr E9B5D9 E9B5D9_LEIMU | RuvB-like helicase OS=Lei   | 13 |
| 3.697531825 | 1.9188 | E9AV90;Q86 | tr E9AV90 E9AV90_LEIMU | Putative 40S ribosomal pr   | 4  |
| 3.504490599 | 1.9186 | E9AM99;J7F | tr E9AM99 E9AM99_LEIMU | Uncharacterized protein     | 7  |
| 4.046299489 | 1.9179 | E9AZH2     | tr E9AZH2 E9AZH2_LEIMU | Proteasome subunit beta     | 2  |
| 3.85823011  | 1.9177 | E9B2D6     | tr E9B2D6 E9B2D6_LEIMU | Uncharacterized protein C   | 2  |
| 3.86129737  | 1.9174 | E9AXJ1     | tr E9AXJ1 E9AXJ1_LEIMU | Aldehyde dehydrogenase, i   | 11 |



|             |        |            |                                                    |    |
|-------------|--------|------------|----------------------------------------------------|----|
| 3.772770989 | 1.9173 | E9AZL6     | tr E9AZL6 E9AZL6_LEIMU DNA repair protein RAD51    | 2  |
| 3.265111672 | 1.9163 | E9AR77     | tr E9AR77 E9AR77_LEIMU Hydrolase-like protein (Es  | 2  |
| 4.207803924 | 1.9162 | E9B3U3     | tr E9B3U3 E9B3U3_LEIMU Putative guanylate kinase   | 2  |
| 3.58213811  | 1.9157 | E9B3Y6     | tr E9B3Y6 E9B3Y6_LEIMU Uncharacterized protein O   | 3  |
| 3.829542811 | 1.9152 | E9ANN1     | tr E9ANN1 E9ANN1_LEIMU Putative kinesin OS=Leisl   | 2  |
| 3.984548023 | 1.915  | E9AUA1;Q8  | tr E9AUA1 E9AUA1_LEIMU 2,3-bisphosphoglycerate-    | 8  |
| 2.596371758 | 1.9146 | E9ANE2     | tr E9ANE2 E9ANE2_LEIMU Uncharacterized protein (   | 2  |
| 3.04404178  | 1.9145 | E9B479     | tr E9B479 E9B479_LEIMU Putative GTPase protein O   | 2  |
| 3.550860661 | 1.9144 | E9AXP2     | tr E9AXP2 E9AXP2_LEIMU Uncharacterized protein C   | 2  |
| 3.725275479 | 1.9141 | E9B3R5     | tr E9B3R5 E9B3R5_LEIMU Putative 2,4-dienoyl-coa ri | 2  |
| 3.971586103 | 1.9139 | E9AVH3     | tr E9AVH3 E9AVH3_LEIMU Putative ATP synthase F1    | 5  |
| 4.064859546 | 1.9137 | E9ANC9     | tr E9ANC9 E9ANC9_LEIMU Flagellar protofilament ril | 2  |
| 3.690673443 | 1.9134 | E9ALJ4     | tr E9ALJ4 E9ALJ4_LEIMU Ubiquitinyl hydrolase 1 OS= | 2  |
| 3.78827272  | 1.9122 | E9ATA7     | tr E9ATA7 E9ATA7_LEIMU Uncharacterized protein C   | 6  |
| 4.421971195 | 1.9121 | E9AYV6     | tr E9AYV6 E9AYV6_LEIMU Putative replication factor | 3  |
| 3.803840967 | 1.9113 | E9AVE2     | tr E9AVE2 E9AVE2_LEIMU Uncharacterized protein C   | 12 |
| 4.361374733 | 1.911  | E9B6B8     | tr E9B6B8 E9B6B8_LEIMU Uncharacterized protein C   | 2  |
| 4.033834676 | 1.9103 | E9B6G4     | tr E9B6G4 E9B6G4_LEIMU Uncharacterized protein C   | 3  |
| 3.537785663 | 1.9101 | E9ATT5;E9A | tr E9ATT5 E9ATT5_LEIMU 40S ribosomal protein SA (  | 12 |
| 3.767757696 | 1.9094 | E9B1M1     | tr E9B1M1 E9B1M1_LEIMU Putative ATP-dependent      | 4  |
| 3.121231644 | 1.9093 | E9AS66     | tr E9AS66 E9AS66_LEIMU Uncharacterized protein O   | 3  |
| 4.151645049 | 1.9088 | E9AMW3     | tr E9AMW3 E9AMW3_LEIMU Mitochondrial RNA bir       | 6  |
| 3.892843103 | 1.908  | E9AVS5;E9A | tr E9AVS5 E9AVS5_LEIMU Uncharacterized protein C   | 3  |
| 3.632353888 | 1.9073 | E9AWR3     | tr E9AWR3 E9AWR3_LEIMU Signal recognition partic   | 5  |
| 3.549865955 | 1.907  | E9B6F6     | tr E9B6F6 E9B6F6_LEIMU Uncharacterized protein O   | 2  |
| 3.76860894  | 1.9068 | E9APL6     | tr E9APL6 E9APL6_LEIMU Uncharacterized protein O   | 2  |
| 3.857070394 | 1.9068 | E9B007     | tr E9B007 E9B007_LEIMU Uncharacterized protein C   | 5  |
| 4.288442706 | 1.9065 | E9B063     | tr E9B063 E9B063_LEIMU Dihydrolipoamide acetyltr   | 7  |
| 3.748565969 | 1.9062 | E9B4N7     | tr E9B4N7 E9B4N7_LEIMU Uncharacterized protein (   | 3  |
| 4.118942215 | 1.9057 | E9AKS5     | tr E9AKS5 E9AKS5_LEIMU ATP-NAD kinase-like prote   | 2  |
| 3.448082608 | 1.9042 | E9ARB0     | tr E9ARB0 E9ARB0_LEIMU Protein SDA1 OS=Leishma     | 3  |
| 3.988557232 | 1.9041 | E9APD0     | tr E9APD0 E9APD0_LEIMU NADH-cytochrome b5 rec      | 3  |
| 3.292335275 | 1.9037 | E9AR26     | tr E9AR26 E9AR26_LEIMU Uncharacterized protein C   | 2  |
| 4.247046019 | 1.9032 | E9AK94     | tr E9AK94 E9AK94_LEIMU Putative cytochrome c oxi   | 2  |
| 3.696330493 | 1.9031 | E9B6H6     | tr E9B6H6 E9B6H6_LEIMU Uncharacterized protein C   | 3  |
| 3.142395685 | 1.9026 | E9B5E1     | tr E9B5E1 E9B5E1_LEIMU Peroxisome biosynthesis p   | 2  |
| 4.119135936 | 1.9025 | E9AXJ6;E9A | tr E9AXJ6 E9AXJ6_LEIMU ATP synthase subunit beta   | 26 |
| 4.306264494 | 1.9016 | E9B0Q3     | tr E9B0Q3 E9B0Q3_LEIMU Putative calcium-binding    | 3  |
| 3.902432924 | 1.9015 | E9B258     | tr E9B258 E9B258_LEIMU Uncharacterized protein C   | 6  |
| 3.797462682 | 1.9005 | E9ALW5;E9A | tr E9ALW5 E9ALW5_LEIMU Putative ribosomal prote    | 10 |
| 4.093107753 | 1.8998 | E9B1E3     | tr E9B1E3 E9B1E3_LEIMU Uncharacterized protein O   | 8  |
| 3.737160465 | 1.8991 | E9AWD5     | tr E9AWD5 E9AWD5_LEIMU Uncharacterized proteir     | 2  |
| 3.495710841 | 1.8988 | E9B1H1;E9B | tr E9B1H1 E9B1H1_LEIMU Uncharacterized protein C   | 2  |
| 3.755423464 | 1.8977 | E9AZL2     | tr E9AZL2 E9AZL2_LEIMU Uncharacterized protein O   | 2  |
| 3.891835753 | 1.8975 | E9AWL4     | tr E9AWL4 E9AWL4_LEIMU Putative ATP-dependent      | 5  |
| 3.324159552 | 1.8969 | E9AU67     | tr E9AU67 E9AU67_LEIMU Uncharacterized protein (   | 2  |
| 3.582749115 | 1.8968 | E9AYR8     | tr E9AYR8 E9AYR8_LEIMU Uncharacterized protein C   | 2  |
| 3.756908628 | 1.8963 | E9AKZ7     | tr E9AKZ7 E9AKZ7_LEIMU Uncharacterized protein C   | 2  |
| 3.606441802 | 1.8956 | E9AS17     | tr E9AS17 E9AS17_LEIMU Uncharacterized protein O   | 7  |
| 4.171648865 | 1.8953 | E9B699     | tr E9B699 E9B699_LEIMU Putative RNA-binding prot   | 7  |

|             |        |            |                                                     |    |
|-------------|--------|------------|-----------------------------------------------------|----|
| 3.83046564  | 1.8949 | E9AJX7     | tr E9AJX7 E9AJX7_LEIMU Uncharacterized protein O'   | 2  |
| 4.010212493 | 1.8949 | E9ALA4     | tr E9ALA4 E9ALA4_LEIMU Splicing factor ptrs1-like p | 7  |
| 4.107213958 | 1.8947 | E8NHG6;E8I | tr E8NHG6 E8NHG6_LEIMU Uncharacterized protein      | 26 |
| 4.101739024 | 1.8946 | E9AJT7     | tr E9AJT7 E9AJT7_LEIMU Putative 26S protease regu   | 6  |
| 4.289694528 | 1.8946 | E9AJ97     | tr E9AJ97 E9AJ97_LEIMU Glutaredoxin-like protein C  | 3  |
| 3.852032484 | 1.8945 | E9AZP1     | tr E9AZP1 E9AZP1_LEIMU Uncharacterized protein C    | 3  |
| 3.764366747 | 1.8944 | E9B593;Q0P | tr E9B593 E9B593_LEIMU Uncharacterized protein C    | 3  |
| 4.040802051 | 1.8943 | E9AYV4     | tr E9AYV4 E9AYV4_LEIMU Uncharacterized protein C    | 2  |
| 4.020988017 | 1.894  | E9B0G8     | tr E9B0G8 E9B0G8_LEIMU Sulfhydryl oxidase OS=Lei    | 2  |
| 4.393214685 | 1.8938 | E9AXD1     | tr E9AXD1 E9AXD1_LEIMU Uncharacterized protein (    | 4  |
| 3.603077232 | 1.8937 | E9AZJ4     | tr E9AZJ4 E9AZJ4_LEIMU Putative rrp44p homologue    | 2  |
| 3.565770994 | 1.8931 | E9AYS2     | tr E9AYS2 E9AYS2_LEIMU Uncharacterized protein O    | 2  |
| 4.07335371  | 1.8921 | E9ASX7     | tr E9ASX7 E9ASX7_LEIMU Chaperonin HSP60, mitoch     | 12 |
| 4.311001904 | 1.8911 | E9AXL1     | tr E9AXL1 E9AXL1_LEIMU Serine/threonine-protein p   | 2  |
| 3.595196023 | 1.8907 | E8NHH1     | tr E8NHH1 E8NHH1_LEIMU WGS CADB00000000 dat         | 4  |
| 4.001310322 | 1.8905 | E9AYP5     | tr E9AYP5 E9AYP5_LEIMU Uncharacterized protein C    | 2  |
| 4.140254441 | 1.8897 | E9ASX8     | tr E9ASX8 E9ASX8_LEIMU Chaperonin HSP60, mitoch     | 11 |
| 4.212821776 | 1.8897 | E9B3K3     | tr E9B3K3 E9B3K3_LEIMU Thiol-dependent reductas     | 2  |
| 4.247891787 | 1.8892 | E9AMM2     | tr E9AMM2 E9AMM2_LEIMU Heat shock protein Hsl       | 8  |
| 4.147827458 | 1.8885 | E8NHS4;E8N | tr E8NHS4 E8NHS4_LEIMU WGS CADB00000000 dat         | 2  |
| 3.882040523 | 1.8883 | E9AK75     | tr E9AK75 E9AK75_LEIMU Uncharacterized protein C    | 3  |
| 4.030819314 | 1.8876 | E9B361     | tr E9B361 E9B361_LEIMU Proteasome regulatory no     | 6  |
| 3.983571542 | 1.8873 | E9B2L9     | tr E9B2L9 E9B2L9_LEIMU Uncharacterized protein O    | 9  |
| 3.635408206 | 1.8872 | E9B4J8     | tr E9B4J8 E9B4J8_LEIMU Uncharacterized protein O'   | 7  |
| 4.07414572  | 1.8869 | E9ALB6     | tr E9ALB6 E9ALB6_LEIMU Putative nucleolar RNA-bir   | 3  |
| 3.945040467 | 1.8868 | E9B1C1     | tr E9B1C1 E9B1C1_LEIMU Uncharacterized protein C    | 4  |
| 3.88065306  | 1.8867 | E9B4T9     | tr E9B4T9 E9B4T9_LEIMU Uncharacterized protein O    | 2  |
| 3.538029923 | 1.8866 | E9B106     | tr E9B106 E9B106_LEIMU Uncharacterized protein C    | 3  |
| 3.968688959 | 1.8866 | E9B3F9     | tr E9B3F9 E9B3F9_LEIMU Uncharacterized protein O    | 3  |
| 3.869842533 | 1.8864 | E9B570     | tr E9B570 E9B570_LEIMU Uncharacterized protein C    | 5  |
| 3.762050076 | 1.8862 | E9B656     | tr E9B656 E9B656_LEIMU Putative DNA polymerase      | 3  |
| 4.593887812 | 1.8859 | E9AZ25     | tr E9AZ25 E9AZ25_LEIMU Uncharacterized protein C    | 11 |
| 4.23528803  | 1.8848 | E9AQS3     | tr E9AQS3 E9AQS3_LEIMU Tyrosyl or methionyl-tRN     | 5  |
| 4.524502049 | 1.8846 | E9AJI9     | tr E9AJI9 E9AJI9_LEIMU Small GTP binding protein ra | 3  |
| 4.076776576 | 1.8831 | E9AS67     | tr E9AS67 E9AS67_LEIMU Uncharacterized protein O    | 8  |
| 3.770576243 | 1.8824 | E9B5L5     | tr E9B5L5 E9B5L5_LEIMU Uncharacterized protein O    | 2  |
| 3.616419862 | 1.8822 | E9B4I1;A7U | tr E9B4I1 E9B4I1_LEIMU Malate dehydrogenase OS=     | 9  |
| 3.985690181 | 1.8821 | E9ALH0     | tr E9ALH0 E9ALH0_LEIMU Uncharacterized protein C    | 4  |
| 3.798449094 | 1.8812 | E9AKI8     | tr E9AKI8 E9AKI8_LEIMU Uncharacterized protein O'   | 7  |
| 4.041730184 | 1.8812 | E9APG0     | tr E9APG0 E9APG0_LEIMU Uncharacterized protein (    | 11 |
| 4.075172054 | 1.8811 | E9AJF8     | tr E9AJF8 E9AJF8_LEIMU Putative ubiquitin activatin | 2  |
| 3.609881569 | 1.8795 | E9AV52     | tr E9AV52 E9AV52_LEIMU Uncharacterized protein C    | 12 |
| 4.100301071 | 1.8789 | E9B278     | tr E9B278 E9B278_LEIMU Putative ADP-ribosylation    | 7  |
| 3.480034877 | 1.8789 | E9B4R3     | tr E9B4R3 E9B4R3_LEIMU Uncharacterized protein C    | 2  |
| 4.006293111 | 1.8784 | E9B675     | tr E9B675 E9B675_LEIMU Uncharacterized protein C    | 3  |
| 3.871451307 | 1.8783 | E9AZ26     | tr E9AZ26 E9AZ26_LEIMU Uncharacterized protein C    | 2  |
| 3.556057979 | 1.8783 | E9APU4     | tr E9APU4 E9APU4_LEIMU ADP/ATP mitochondrial c      | 4  |
| 3.719887334 | 1.8775 | E9B6R8     | tr E9B6R8 E9B6R8_LEIMU Uncharacterized protein C    | 7  |
| 4.092302515 | 1.8772 | Q6Y8G9;E9A | tr Q6Y8G9 Q6Y8G9_LEIME Beta adaptin OS=Leishma      | 2  |
| 3.82833255  | 1.8771 | E9AZW2     | tr E9AZW2 E9AZW2_LEIMU Putative DNA polymeras       | 3  |

|             |        |            |                                                    |    |
|-------------|--------|------------|----------------------------------------------------|----|
| 4.169636808 | 1.8769 | E9AVB3     | tr E9AVB3 E9AVB3_LEIMU Putative vesicle-associat   | 2  |
| 4.339399226 | 1.8769 | E9ATU9     | tr E9ATU9 E9ATU9_LEIMU Uncharacterized protein (   | 4  |
| 3.870960011 | 1.8763 | E9B3N2     | tr E9B3N2 E9B3N2_LEIMU Uncharacterized protein (   | 2  |
| 3.953247106 | 1.8762 | E9B5V6     | tr E9B5V6 E9B5V6_LEIMU Conserved CBS domain pr     | 3  |
| 3.636898169 | 1.8757 | E9B406     | tr E9B406 E9B406_LEIMU DNA polymerase OS=Leish     | 6  |
| 3.940903506 | 1.8755 | E9AYL3     | tr E9AYL3 E9AYL3_LEIMU Uncharacterized protein O   | 2  |
| 3.539605442 | 1.8755 | E9AZ99     | tr E9AZ99 E9AZ99_LEIMU Uncharacterized protein C   | 4  |
| 3.215746021 | 1.8755 | E9ASN8     | tr E9ASN8 E9ASN8_LEIMU Uncharacterized protein (   | 3  |
| 3.88582438  | 1.8748 | E9ANK8;E9A | tr E9ANK8 E9ANK8_LEIMU Putative aminopeptidase     | 4  |
| 3.86147902  | 1.8743 | E9AV05     | tr E9AV05 E9AV05_LEIMU Uncharacterized protein (   | 3  |
| 3.659091454 | 1.8742 | E9AMS6     | tr E9AMS6 E9AMS6_LEIMU Putative acyl-CoA bindin    | 2  |
| 3.715710078 | 1.8738 | E9B397     | tr E9B397 E9B397_LEIMU Pyrroline-5-carboxylate sy  | 3  |
| 4.28043938  | 1.8738 | E9AK40;A0A | tr E9AK40 E9AK40_LEIMU Putative spermidine synth   | 3  |
| 4.148074929 | 1.8737 | E9B1Y7;E9B | tr E9B1Y7 E9B1Y7_LEIMU Mannosyltransferase-like    | 4  |
| 3.929707226 | 1.8736 | E9B735     | tr E9B735 E9B735_LEIMU Uncharacterized protein C   | 2  |
| 3.783412616 | 1.8736 | E9AZQ3     | tr E9AZQ3 E9AZQ3_LEIMU Uncharacterized protein (   | 2  |
| 3.871171059 | 1.8731 | E9AVN8     | tr E9AVN8 E9AVN8_LEIMU Kinesin-like protein OS=L   | 2  |
| 4.018843206 | 1.873  | E9ASZ4     | tr E9ASZ4 E9ASZ4_LEIMU Uncharacterized protein O   | 2  |
| 4.141845377 | 1.8729 | E9ATM0     | tr E9ATM0 E9ATM0_LEIMU Proteasome regulatory /     | 9  |
| 3.825416621 | 1.8723 | E9B081     | tr E9B081 E9B081_LEIMU Putative splicing factor 3B | 7  |
| 3.613723961 | 1.8723 | E9ATM8     | tr E9ATM8 E9ATM8_LEIMU Uncharacterized protein     | 2  |
| 3.8312262   | 1.8722 | E9AT56     | tr E9AT56 E9AT56_LEIMU Uncharacterized protein C   | 4  |
| 4.218060682 | 1.8719 | E9AZZ2     | tr E9AZZ2 E9AZZ2_LEIMU Proteasome regulatory no    | 12 |
| 4.043323537 | 1.8716 | E9AQS6     | tr E9AQS6 E9AQS6_LEIMU Uncharacterized protein (   | 2  |
| 3.999368687 | 1.8704 | E9ARQ0     | tr E9ARQ0 E9ARQ0_LEIMU Putative ras-related prote  | 3  |
| 3.353825557 | 1.87   | E9AM37     | tr E9AM37 E9AM37_LEIMU Uncharacterized protein     | 2  |
| 3.71244501  | 1.8699 | E9B6Z2     | tr E9B6Z2 E9B6Z2_LEIMU Uncharacterized protein O   | 7  |
| 3.952423458 | 1.8698 | E9B3A6     | tr E9B3A6 E9B3A6_LEIMU Putative dynein light inter | 3  |
| 4.042996055 | 1.8694 | E9B313     | tr E9B313 E9B313_LEIMU Putative cytochrome-b5 re   | 3  |
| 3.996073867 | 1.8692 | E9AM09     | tr E9AM09 E9AM09_LEIMU Uncharacterized protein     | 2  |
| 3.635961217 | 1.869  | E9AYL9     | tr E9AYL9 E9AYL9_LEIMU Uncharacterized protein O   | 9  |
| 3.326332515 | 1.869  | E9AJY3;O09 | tr E9AJY3 E9AJY3_LEIMU Calcium-transporting ATPa:  | 17 |
| 4.049122578 | 1.8689 | E9ATX7     | tr E9ATX7 E9ATX7_LEIMU Putative branch point binc  | 3  |
| 3.003646277 | 1.8667 | E9APM1     | tr E9APM1 E9APM1_LEIMU Uncharacterized protein     | 2  |
| 3.529300707 | 1.8666 | E9AV20     | tr E9AV20 E9AV20_LEIMU Uncharacterized protein (   | 5  |
| 3.334942725 | 1.8666 | E9B398     | tr E9B398 E9B398_LEIMU Uncharacterized protein C   | 5  |
| 3.571165983 | 1.8662 | E9AWA2     | tr E9AWA2 E9AWA2_LEIMU Quinone oxidoreductas       | 2  |
| 3.805765314 | 1.8662 | E9ASF4     | tr E9ASF4 E9ASF4_LEIMU Phosphatidylinositol-4-phc  | 3  |
| 3.563726624 | 1.8657 | E9B1F7     | tr E9B1F7 E9B1F7_LEIMU Uncharacterized protein O   | 4  |
| 3.930780665 | 1.8655 | E9B4Z0;P90 | tr E9B4Z0 E9B4Z0_LEIMU ATP-dependent RNA helic     | 2  |
| 4.004184416 | 1.8654 | E9AJU6     | tr E9AJU6 E9AJU6_LEIMU Uncharacterized protein O   | 3  |
| 3.850991979 | 1.8643 | E9B1Z6     | tr E9B1Z6 E9B1Z6_LEIMU Tryparedoxin-like protein ( | 2  |
| 3.234607586 | 1.8637 | E9B555     | tr E9B555 E9B555_LEIMU Uncharacterized protein C   | 2  |
| 3.442297756 | 1.8637 | E9AQJ6;O76 | tr E9AQJ6 E9AQJ6_LEIMU Uncharacterized protein C   | 4  |
| 3.962703052 | 1.8634 | E9AJB7     | tr E9AJB7 E9AJB7_LEIMU Putative acidocalcisomal e: | 4  |
| 3.758996052 | 1.8631 | E9B1B6     | tr E9B1B6 E9B1B6_LEIMU Uncharacterized protein C   | 4  |
| 3.669711539 | 1.8624 | E9AQG1     | tr E9AQG1 E9AQG1_LEIMU Uncharacterized protein     | 4  |
| 4.081880358 | 1.8623 | E9ANK2     | tr E9ANK2 E9ANK2_LEIMU Transcription modulator/    | 2  |
| 3.589710032 | 1.8617 | E9ASH9     | tr E9ASH9 E9ASH9_LEIMU Uncharacterized protein (   | 2  |
| 4.21309888  | 1.8617 | E9ANV2     | tr E9ANV2 E9ANV2_LEIMU Putative cysteinyl-tRNA s   | 6  |

|             |        |            |                                                     |    |
|-------------|--------|------------|-----------------------------------------------------|----|
| 3.578577782 | 1.8614 | E9AYH8     | tr E9AYH8 E9AYH8_LEIMU Uncharacterized protein C    | 2  |
| 3.908751579 | 1.8612 | E9B0C5     | tr E9B0C5 E9B0C5_LEIMU Uncharacterized protein L    | 3  |
| 4.330628788 | 1.8611 | E9AT43     | tr E9AT43 E9AT43_LEIMU Dihydrolipoamide acetyltr    | 15 |
| 4.567858439 | 1.8611 | E9AV33     | tr E9AV33 E9AV33_LEIMU Metallo-beta-lactamase fa    | 2  |
| 3.799737573 | 1.8603 | E9AZT8     | tr E9AZT8 E9AZT8_LEIMU Copine i-like protein OS=Le  | 8  |
| 3.58163143  | 1.8603 | E9AK15     | tr E9AK15 E9AK15_LEIMU Putative mitochondrial ex    | 2  |
| 3.766509065 | 1.86   | E9B1Q7     | tr E9B1Q7 E9B1Q7_LEIMU Uncharacterized protein C    | 2  |
| 3.458613894 | 1.8599 | E9AWK8     | tr E9AWK8 E9AWK8_LEIMU Uncharacterized protein      | 2  |
| 3.617808418 | 1.8588 | E9AJZ6     | tr E9AJZ6 E9AJZ6_LEIMU Putative exosome complex     | 3  |
| 3.78851059  | 1.8588 | E9APZ6     | tr E9APZ6 E9APZ6_LEIMU Putative glutathione-S-tra   | 6  |
| 4.030466761 | 1.8588 | E9AZN8     | tr E9AZN8 E9AZN8_LEIMU Putative DNA repair prote    | 2  |
| 3.292102573 | 1.8587 | E9B543     | tr E9B543 E9B543_LEIMU Uncharacterized protein C    | 2  |
| 3.249179163 | 1.8586 | E9AZ84     | tr E9AZ84 E9AZ84_LEIMU Uncharacterized protein C    | 15 |
| 4.042251364 | 1.8582 | Q86PL4;E9A | tr Q86PL4 Q86PL4_LEIME Paraflagellar rod protein 1  | 25 |
| 3.707163809 | 1.858  | E9B529     | tr E9B529 E9B529_LEIMU DNAj-like protein OS=Leis    | 3  |
| 3.317044913 | 1.8578 | E9AKC8;E9A | tr E9AKC8 E9AKC8_LEIMU Putative viscerotropic leis  | 2  |
| 3.894635912 | 1.8577 | E9B6S8     | tr E9B6S8 E9B6S8_LEIMU Uncharacterized protein (M   | 2  |
| 3.659159278 | 1.8576 | E9ALW2     | tr E9ALW2 E9ALW2_LEIMU Uncharacterized protein      | 5  |
| 4.031324834 | 1.8575 | E9AJL7     | tr E9AJL7 E9AJL7_LEIMU Uncharacterized protein OS   | 4  |
| 3.735732655 | 1.8575 | E9B4K9     | tr E9B4K9 E9B4K9_LEIMU Uncharacterized protein C    | 5  |
| 4.125575053 | 1.8569 | E9ATU4     | tr E9ATU4 E9ATU4_LEIMU Uncharacterized protein C    | 22 |
| 3.402590014 | 1.8568 | E9AX43     | tr E9AX43 E9AX43_LEIMU Uncharacterized protein C    | 6  |
| 3.647173984 | 1.8565 | E9B2L7     | tr E9B2L7 E9B2L7_LEIMU Uncharacterized protein O    | 2  |
| 3.602424006 | 1.8553 | E9AZ92     | tr E9AZ92 E9AZ92_LEIMU Uncharacterized protein C    | 5  |
| 3.906382072 | 1.8549 | E9AY26     | tr E9AY26 E9AY26_LEIMU Uncharacterized protein C    | 2  |
| 3.824130391 | 1.8543 | E9B4Y8     | tr E9B4Y8 E9B4Y8_LEIMU Uncharacterized protein O    | 2  |
| 3.645990308 | 1.8538 | E9AQM5     | tr E9AQM5 E9AQM5_LEIMU Uncharacterized protein      | 2  |
| 3.529668721 | 1.8538 | E9B469     | tr E9B469 E9B469_LEIMU Putative udp-glc 4-epimer    | 4  |
| 3.731457986 | 1.8538 | E9AVS3     | tr E9AVS3 E9AVS3_LEIMU Uncharacterized protein C    | 2  |
| 3.835057542 | 1.8534 | E9ASK7     | tr E9ASK7 E9ASK7_LEIMU Putative DEAH-box RNA he     | 2  |
| 4.111437467 | 1.8531 | E9B5Y5     | tr E9B5Y5 E9B5Y5_LEIMU Uncharacterized protein O    | 2  |
| 3.957511628 | 1.853  | E9B594     | tr E9B594 E9B594_LEIMU Uncharacterized protein C    | 2  |
| 3.936367829 | 1.8523 | E9B2R1     | tr E9B2R1 E9B2R1_LEIMU Putative RNA guanylyltran    | 4  |
| 3.928673995 | 1.8522 | E9ARU0     | tr E9ARU0 E9ARU0_LEIMU Uncharacterized protein      | 2  |
| 3.943360984 | 1.8518 | E9ANZ4     | tr E9ANZ4 E9ANZ4_LEIMU Cytochrome c oxidase suk     | 17 |
| 3.596151915 | 1.8516 | E9APZ1     | tr E9APZ1 E9APZ1_LEIMU Uncharacterized protein C    | 3  |
| 4.320937377 | 1.8515 | E9B0Q4;A0A | tr E9B0Q4 E9B0Q4_LEIMU Putative Pyridoxal kinase    | 6  |
| 4.049842892 | 1.8512 | E9B6Z8     | tr E9B6Z8 E9B6Z8_LEIMU Uncharacterized protein O    | 5  |
| 3.330075729 | 1.85   | E9AXA3     | tr E9AXA3 E9AXA3_LEIMU Uncharacterized protein C    | 2  |
| 3.849993349 | 1.8498 | E9ASD8     | tr E9ASD8 E9ASD8_LEIMU Putative SET domain prote    | 2  |
| 4.09761385  | 1.8496 | E9B0C7     | tr E9B0C7 E9B0C7_LEIMU Peptidyl-prolyl cis-trans is | 2  |
| 3.518682113 | 1.8495 | E9B2V8     | tr E9B2V8 E9B2V8_LEIMU Uncharacterized protein C    | 2  |
| 3.680878818 | 1.8493 | E9ALY1     | tr E9ALY1 E9ALY1_LEIMU Uncharacterized protein O    | 6  |
| 3.801596276 | 1.8493 | E9B5P9     | tr E9B5P9 E9B5P9_LEIMU Putative coatomer zeta su    | 2  |
| 3.825554254 | 1.8492 | E9B2G6;E9A | tr E9B2G6 E9B2G6_LEIMU 40S ribosomal protein S2     | 13 |
| 3.901712429 | 1.849  | E9B2E4     | tr E9B2E4 E9B2E4_LEIMU Dynein light chain OS=Leis   | 2  |
| 3.758195352 | 1.8489 | E9B379     | tr E9B379 E9B379_LEIMU ATP binding protein-like p   | 4  |
| 3.477596086 | 1.8486 | E9AP88     | tr E9AP88 E9AP88_LEIMU Uncharacterized protein C    | 4  |
| 3.701672351 | 1.8482 | E9AQS9     | tr E9AQS9 E9AQS9_LEIMU Coatomer subunit delta C     | 6  |
| 4.054285597 | 1.8481 | E9AMR1     | tr E9AMR1 E9AMR1_LEIMU Putative cyclin 1 OS=Leis    | 3  |

|             |        |               |                                                     |    |
|-------------|--------|---------------|-----------------------------------------------------|----|
| 4.315388898 | 1.8473 | E9B1G1        | tr E9B1G1 E9B1G1_LEIMU Uncharacterized protein C    | 5  |
| 3.656109143 | 1.8471 | E9ANZ7        | tr E9ANZ7 E9ANZ7_LEIMU Uncharacterized protein C    | 3  |
| 3.920929133 | 1.8471 | E9AVR2        | tr E9AVR2 E9AVR2_LEIMU NADH-cytochrome b5 red       | 4  |
| 3.643595816 | 1.8469 | E9AVN9        | tr E9AVN9 E9AVN9_LEIMU Putative proteasome reg      | 7  |
| 3.918125015 | 1.8468 | E9B508        | tr E9B508 E9B508_LEIMU Uncharacterized protein C    | 5  |
| 4.159217982 | 1.8468 | E9AK77        | tr E9AK77 E9AK77_LEIMU Putative adenylate kinase    | 4  |
| 3.720831366 | 1.8467 | E9AKU1        | tr E9AKU1 E9AKU1_LEIMU Uncharacterized protein C    | 2  |
| 4.357465208 | 1.8466 | Q9Y079;Q9Y079 | tr Q9Y079 Q9Y079_LEIIN Putative mitogen-activated   | 3  |
| 3.681903615 | 1.8465 | Q4TZP8;E9B    | tr Q4TZP8 Q4TZP8_LEIME Putative mitogen-activate    | 3  |
| 2.969533063 | 1.8462 | E9ALM6        | tr E9ALM6 E9ALM6_LEIMU Uncharacterized protein      | 3  |
| 3.770083629 | 1.8461 | E9AUQ1        | tr E9AUQ1 E9AUQ1_LEIMU Putative phosphatidylinc     | 3  |
| 4.47928472  | 1.8458 | E9APC9        | tr E9APC9 E9APC9_LEIMU Uncharacterized protein C    | 3  |
| 4.136859667 | 1.8454 | E9B6C2        | tr E9B6C2 E9B6C2_LEIMU Putative phosphoinositide    | 2  |
| 4.147002252 | 1.8453 | E9AUB2        | tr E9AUB2 E9AUB2_LEIMU AP complex subunit beta      | 6  |
| 4.223060403 | 1.8453 | E9APT8        | tr E9APT8 E9APT8_LEIMU Putative immunodominan       | 12 |
| 3.881644402 | 1.8452 | E9B0Q2        | tr E9B0Q2 E9B0Q2_LEIMU Uncharacterized protein C    | 3  |
| 3.470361741 | 1.8451 | E9AJR6        | tr E9AJR6 E9AJR6_LEIMU Uncharacterized protein O    | 4  |
| 3.378344133 | 1.845  | E9B4U7        | tr E9B4U7 E9B4U7_LEIMU Uncharacterized protein C    | 2  |
| 3.969035093 | 1.8444 | E9AUL6        | tr E9AUL6 E9AUL6_LEIMU Uncharacterized protein C    | 3  |
| 3.954040121 | 1.8443 | E9AUY6        | tr E9AUY6 E9AUY6_LEIMU Uncharacterized protein C    | 3  |
| 3.572635363 | 1.8442 | E9APK4        | tr E9APK4 E9APK4_LEIMU Uncharacterized protein C    | 4  |
| 4.161750568 | 1.8438 | E9AQ51        | tr E9AQ51 E9AQ51_LEIMU Uncharacterized protein C    | 5  |
| 4.571805436 | 1.8433 | E9B138        | tr E9B138 E9B138_LEIMU Uncharacterized protein C    | 2  |
| 2.988965152 | 1.8433 | E9AS10        | tr E9AS10 E9AS10_LEIMU Uncharacterized protein C    | 2  |
| 4.398593737 | 1.8433 | E9AM06        | tr E9AM06 E9AM06_LEIMU Elongation factor Ts, mit    | 2  |
| 3.656959579 | 1.8431 | E9AR49        | tr E9AR49 E9AR49_LEIMU Uncharacterized protein C    | 3  |
| 4.131581145 | 1.8431 | E9ALW3        | tr E9ALW3 E9ALW3_LEIMU Uncharacterized protein      | 5  |
| 4.238883985 | 1.8429 | E9B3P0        | tr E9B3P0 E9B3P0_LEIMU Uncharacterized protein C    | 5  |
| 4.122784362 | 1.8426 | E9B2J1        | tr E9B2J1 E9B2J1_LEIMU Putative OSM3-like kinesin   | 3  |
| 3.722742293 | 1.8425 | E9AU95        | tr E9AU95 E9AU95_LEIMU Uncharacterized protein C    | 3  |
| 3.566715753 | 1.8422 | E9B2M5        | tr E9B2M5 E9B2M5_LEIMU Chaperonin containing t      | 14 |
| 4.268191519 | 1.8418 | E9AYM9        | tr E9AYM9 E9AYM9_LEIMU CDP-diacylglycerol--inosi    | 2  |
| 3.713165192 | 1.8412 | E9ALY7        | tr E9ALY7 E9ALY7_LEIMU Uncharacterized protein O    | 8  |
| 3.989000487 | 1.8403 | E9B2J9        | tr E9B2J9 E9B2J9_LEIMU Putative RNA binding prote   | 5  |
| 3.673407591 | 1.8393 | E9ARP1        | tr E9ARP1 E9ARP1_LEIMU Putative putative 5-oxopr    | 2  |
| 3.924557392 | 1.8392 | E9B4A3        | tr E9B4A3 E9B4A3_LEIMU Putative dynein intermedi    | 7  |
| 3.577701706 | 1.8392 | E9AV56        | tr E9AV56 E9AV56_LEIMU Methionine aminopeptida      | 3  |
| 4.046447741 | 1.8392 | E9B146        | tr E9B146 E9B146_LEIMU Conserved TPR domain pr      | 9  |
| 4.01288989  | 1.8389 | E9AVW5        | tr E9AVW5 E9AVW5_LEIMU Uncharacterized proteir      | 5  |
| 4.024001062 | 1.8378 | E9AUL3        | tr E9AUL3 E9AUL3_LEIMU Uncharacterized protein C    | 2  |
| 3.865137997 | 1.8378 | E9ARG5        | tr E9ARG5 E9ARG5_LEIMU Uncharacterized protein C    | 10 |
| 4.232546756 | 1.8377 | E9AS31        | tr E9AS31 E9AS31_LEIMU Putative signal recognition  | 5  |
| 3.808814474 | 1.8377 | E9B5A0        | tr E9B5A0 E9B5A0_LEIMU Uncharacterized protein C    | 3  |
| 3.666250083 | 1.8372 | E9B303        | tr E9B303 E9B303_LEIMU Uncharacterized protein C    | 3  |
| 3.672467094 | 1.8364 | E9B4U9        | tr E9B4U9 E9B4U9_LEIMU Putative NLI-interacting fa  | 2  |
| 4.353487513 | 1.8362 | E9ARF9        | tr E9ARF9 E9ARF9_LEIMU Putative RNA-binding prot    | 3  |
| 4.414670024 | 1.8361 | E9B191        | tr E9B191 E9B191_LEIMU Uncharacterized protein C    | 3  |
| 3.281805646 | 1.8361 | E9ALP1        | tr E9ALP1 E9ALP1_LEIMU Putative dihydrolipoamide    | 2  |
| 3.299759507 | 1.836  | E9AX75        | tr E9AX75 E9AX75_LEIMU Cullin-like protein-like pro | 4  |
| 3.722018918 | 1.836  | E9AR96        | tr E9AR96 E9AR96_LEIMU Uncharacterized protein C    | 9  |

|             |        |            |                                                    |    |
|-------------|--------|------------|----------------------------------------------------|----|
| 3.481056231 | 1.8357 | E9ATT6     | tr E9ATT6 E9ATT6_LEIMU Uncharacterized protein C   | 3  |
| 3.763496548 | 1.8355 | E9AUQ4     | tr E9AUQ4 E9AUQ4_LEIMU Uncharacterized protein     | 2  |
| 3.828765831 | 1.8351 | E9ATH0     | tr E9ATH0 E9ATH0_LEIMU Eukaryotic translation init | 7  |
| 3.704212388 | 1.8346 | E9AV16     | tr E9AV16 E9AV16_LEIMU Putative DnaJ protein OS=   | 7  |
| 4.305016345 | 1.8342 | E9AP58     | tr E9AP58 E9AP58_LEIMU Uncharacterized protein C   | 2  |
| 3.78033713  | 1.8341 | E9ARU5     | tr E9ARU5 E9ARU5_LEIMU Uncharacterized protein     | 11 |
| 3.809368927 | 1.8334 | E9AZN4     | tr E9AZN4 E9AZN4_LEIMU Uncharacterized protein C   | 3  |
| 3.91515464  | 1.8333 | E9AMY4     | tr E9AMY4 E9AMY4_LEIMU Putative paraflagellar ro   | 9  |
| 3.293669304 | 1.8332 | E9ASV9     | tr E9ASV9 E9ASV9_LEIMU Uncharacterized protein C   | 2  |
| 3.60033709  | 1.8327 | E9AXT6     | tr E9AXT6 E9AXT6_LEIMU Uncharacterized protein C   | 2  |
| 3.428496698 | 1.8327 | E9ASG3     | tr E9ASG3 E9ASG3_LEIMU Vacuolar protein sorting-2  | 2  |
| 3.779358293 | 1.8325 | E8NHK6     | tr E8NHK6 E8NHK6_LEIMU WGS CADB000000000 dat       | 2  |
| 3.838134866 | 1.8323 | E9B485     | tr E9B485 E9B485_LEIMU Uncharacterized protein C   | 4  |
| 4.131203899 | 1.8322 | E9B629     | tr E9B629 E9B629_LEIMU Mitochondrial import inne   | 2  |
| 3.953052844 | 1.8318 | E9ATW8     | tr E9ATW8 E9ATW8_LEIMU Uncharacterized protein     | 14 |
| 3.67512817  | 1.8311 | E9AL22     | tr E9AL22 E9AL22_LEIMU Uncharacterized protein O   | 3  |
| 3.892384254 | 1.8307 | E9AU38     | tr E9AU38 E9AU38_LEIMU Uncharacterized protein C   | 13 |
| 3.851177656 | 1.8303 | E9B0H0     | tr E9B0H0 E9B0H0_LEIMU Eukaryotic translation init | 4  |
| 3.20874029  | 1.8293 | E9ART7     | tr E9ART7 E9ART7_LEIMU Putative kinesin OS=Leish   | 2  |
| 4.439640905 | 1.8291 | E9ARB4     | tr E9ARB4 E9ARB4_LEIMU Putative otubain (Otubain   | 3  |
| 3.670640549 | 1.829  | E9B112     | tr E9B112 E9B112_LEIMU Uncharacterized protein C   | 8  |
| 3.950622898 | 1.829  | E9AZC3     | tr E9AZC3 E9AZC3_LEIMU Uncharacterized protein C   | 3  |
| 3.677009056 | 1.8288 | E9AKA9     | tr E9AKA9 E9AKA9_LEIMU Uncharacterized protein C   | 2  |
| 3.960460328 | 1.8287 | E9B2F6     | tr E9B2F6 E9B2F6_LEIMU Uncharacterized protein O   | 4  |
| 4.127651908 | 1.8285 | E9AWK2     | tr E9AWK2 E9AWK2_LEIMU Guanine nucleotide-bind     | 4  |
| 3.944544964 | 1.8284 | E9B0A4     | tr E9B0A4 E9B0A4_LEIMU Putative heat shock prote   | 5  |
| 3.993711689 | 1.8281 | E9B4S8     | tr E9B4S8 E9B4S8_LEIMU Putative mitochondrial ATI  | 7  |
| 3.409317557 | 1.828  | E9AM35     | tr E9AM35 E9AM35_LEIMU Uncharacterized protein     | 2  |
| 3.421332408 | 1.8277 | E9ANT9     | tr E9ANT9 E9ANT9_LEIMU Uncharacterized protein C   | 4  |
| 3.781379625 | 1.8277 | E9B537     | tr E9B537 E9B537_LEIMU Uncharacterized protein C   | 5  |
| 3.8153878   | 1.8276 | E9B096     | tr E9B096 E9B096_LEIMU Uncharacterized protein C   | 4  |
| 3.189883205 | 1.8273 | E9ARK3     | tr E9ARK3 E9ARK3_LEIMU Uncharacterized protein C   | 2  |
| 3.73213355  | 1.8272 | E9ATI4     | tr E9ATI4 E9ATI4_LEIMU Uncharacterized protein OS  | 2  |
| 4.382318358 | 1.8268 | E9AXE4     | tr E9AXE4 E9AXE4_LEIMU Putative epsin OS=Leishm    | 6  |
| 3.731727541 | 1.8262 | E9AT78     | tr E9AT78 E9AT78_LEIMU Putative ATP-dependent R    | 6  |
| 3.711229179 | 1.826  | E9AJ92     | tr E9AJ92 E9AJ92_LEIMU Uncharacterized protein O'  | 2  |
| 4.064754737 | 1.8258 | Q9GRT0;E9E | tr Q9GRT0 Q9GRT0_LEIME Casein kinase II alpha sub  | 4  |
| 3.80116329  | 1.8252 | E9B3H7     | tr E9B3H7 E9B3H7_LEIMU Putative GIPL galf transfer | 4  |
| 3.633764958 | 1.8249 | E9B4B0     | tr E9B4B0 E9B4B0_LEIMU DNA helicase OS=Leishma     | 4  |
| 4.171821945 | 1.8248 | E9AMH0     | tr E9AMH0 E9AMH0_LEIMU Uncharacterized proteir     | 7  |
| 4.518462903 | 1.8246 | E9B549     | tr E9B549 E9B549_LEIMU Uncharacterized protein C   | 7  |
| 3.890303146 | 1.8243 | E9AKD3     | tr E9AKD3 E9AKD3_LEIMU Uncharacterized protein C   | 3  |
| 3.687372799 | 1.8243 | E9AJC6     | tr E9AJC6 E9AJC6_LEIMU Uncharacterized protein O'  | 2  |
| 4.179382503 | 1.8229 | E9B722     | tr E9B722 E9B722_LEIMU Uncharacterized protein C   | 3  |
| 3.8349509   | 1.8227 | E9APE7;E9A | tr E9APE7 E9APE7_LEIMU 40S ribosomal protein S4 C  | 14 |
| 3.870100513 | 1.8224 | E9AZL5     | tr E9AZL5 E9AZL5_LEIMU 40S ribosomal protein S26   | 2  |
| 3.980284015 | 1.8223 | E9B1E2     | tr E9B1E2 E9B1E2_LEIMU Uncharacterized protein O   | 20 |
| 3.299884209 | 1.8221 | E9AT48     | tr E9AT48 E9AT48_LEIMU Uncharacterized protein C   | 4  |
| 3.773320361 | 1.8221 | E9B082     | tr E9B082 E9B082_LEIMU Putative leucine-rich repe  | 3  |
| 4.322878669 | 1.8218 | E9B5F8     | tr E9B5F8 E9B5F8_LEIMU Vacuolar ATP synthase cat   | 11 |

|             |        |            |                                                     |    |
|-------------|--------|------------|-----------------------------------------------------|----|
| 3.762100355 | 1.8217 | E9ATA6     | tr E9ATA6 E9ATA6_LEIMU Putative 60S ribosomal pr    | 2  |
| 3.752394283 | 1.8216 | E9B344     | tr E9B344 E9B344_LEIMU Uncharacterized protein C    | 2  |
| 4.107740854 | 1.8216 | E9AMQ7     | tr E9AMQ7 E9AMQ7_LEIMU Uncharacterized protein      | 3  |
| 4.101576103 | 1.8212 | E9ANC6     | tr E9ANC6 E9ANC6_LEIMU Putative rab1 small GTP-b    | 3  |
| 3.722704346 | 1.821  | E9AZY6     | tr E9AZY6 E9AZY6_LEIMU Uncharacterized protein O    | 2  |
| 3.693812771 | 1.821  | E9AWS4     | tr E9AWS4 E9AWS4_LEIMU Uncharacterized protein      | 8  |
| 4.007541589 | 1.8208 | E9AXC0     | tr E9AXC0 E9AXC0_LEIMU Uncharacterized protein C    | 6  |
| 3.902202356 | 1.8208 | E9B2G7     | tr E9B2G7 E9B2G7_LEIMU Putative prostaglandin f s   | 3  |
| 3.908389683 | 1.8207 | E9B597     | tr E9B597 E9B597_LEIMU Putative exosome subunit     | 6  |
| 3.963161871 | 1.8206 | E9AYY9     | tr E9AYY9 E9AYY9_LEIMU Uncharacterized protein C    | 9  |
| 3.771159696 | 1.8205 | E9AQP7;E8M | tr E9AQP7 E9AQP7_LEIMU Uncharacterized protein      | 7  |
| 3.655333136 | 1.8199 | E9AQD5     | tr E9AQD5 E9AQD5_LEIMU Uncharacterized protein      | 3  |
| 3.766389349 | 1.8198 | E9B2C2     | tr E9B2C2 E9B2C2_LEIMU Uncharacterized protein C    | 11 |
| 4.309458968 | 1.8198 | E9AR24     | tr E9AR24 E9AR24_LEIMU Putative RNA-binding prot    | 5  |
| 3.476561821 | 1.8195 | E9AU65     | tr E9AU65 E9AU65_LEIMU Putative homocysteine S-     | 3  |
| 3.177883508 | 1.8192 | E9AP92     | tr E9AP92 E9AP92_LEIMU Uncharacterized protein C    | 4  |
| 4.160505787 | 1.818  | O76285;E9A | tr O76285 O76285_LEIAM Ribonucleotide reductase     | 5  |
| 4.083583619 | 1.8179 | E9B1B1     | tr E9B1B1 E9B1B1_LEIMU Putative calmodulin-relate   | 10 |
| 3.735710865 | 1.8179 | E9AKC4     | tr E9AKC4 E9AKC4_LEIMU Uncharacterized protein C    | 3  |
| 4.117162301 | 1.8179 | E9B2F7     | tr E9B2F7 E9B2F7_LEIMU Uncharacterized protein O    | 3  |
| 3.827741815 | 1.8176 | E8NHJ8;E8N | tr E8NHJ8 E8NHJ8_LEIMU 60S acidic ribosomal prote   | 12 |
| 3.708001165 | 1.817  | E9ALK4     | tr E9ALK4 E9ALK4_LEIMU Uncharacterized protein O    | 4  |
| 3.484753937 | 1.8169 | E9AZM0     | tr E9AZM0 E9AZM0_LEIMU Uncharacterized protein      | 3  |
| 3.945368768 | 1.8168 | E9B705     | tr E9B705 E9B705_LEIMU Putative peptidyl-prolyl cis | 6  |
| 4.174497905 | 1.8167 | E9AVZ3     | tr E9AVZ3 E9AVZ3_LEIMU Uncharacterized protein C    | 2  |
| 4.921623072 | 1.8154 | E9B5D1     | tr E9B5D1 E9B5D1_LEIMU Uncharacterized protein C    | 5  |
| 3.985151581 | 1.8153 | E9APL4     | tr E9APL4 E9APL4_LEIMU Uncharacterized protein O    | 2  |
| 4.233760258 | 1.8149 | E9ATX0     | tr E9ATX0 E9ATX0_LEIMU 2-methoxy-6-polyprenyl-1     | 4  |
| 3.764925461 | 1.8147 | E9AJ89     | tr E9AJ89 E9AJ89_LEIMU Kinesin-like protein OS=Lei  | 2  |
| 3.297123103 | 1.8142 | E9AJW8     | tr E9AJW8 E9AJW8_LEIMU Uncharacterized protein      | 2  |
| 3.412554892 | 1.8139 | E9ANB4     | tr E9ANB4 E9ANB4_LEIMU Uncharacterized protein      | 3  |
| 3.895677582 | 1.8138 | E9ALK7     | tr E9ALK7 E9ALK7_LEIMU Rab GDP dissociation inhib   | 4  |
| 3.726082178 | 1.8136 | E9AZP7     | tr E9AZP7 E9AZP7_LEIMU Putative RNA binding prot    | 2  |
| 3.646393428 | 1.8128 | E9ANX3     | tr E9ANX3 E9ANX3_LEIMU Uncharacterized protein      | 3  |
| 3.655389098 | 1.8125 | E9APQ1     | tr E9APQ1 E9APQ1_LEIMU Uncharacterized protein      | 5  |
| 3.656148474 | 1.812  | E9ANH2     | tr E9ANH2 E9ANH2_LEIMU Uncharacterized protein      | 4  |
| 3.614615519 | 1.8118 | E9AT38     | tr E9AT38 E9AT38_LEIMU Folylpolyglutamate synthe    | 3  |
| 2.999386427 | 1.8104 | E9ATY2     | tr E9ATY2 E9ATY2_LEIMU Uncharacterized protein C    | 2  |
| 3.220625987 | 1.8104 | E9B6I1     | tr E9B6I1 E9B6I1_LEIMU 1-alkyl-2-acetylglycerophos  | 3  |
| 4.118679419 | 1.8104 | E9ANU8     | tr E9ANU8 E9ANU8_LEIMU Proteasome regulatory A      | 10 |
| 3.805354429 | 1.8101 | E9AM79     | tr E9AM79 E9AM79_LEIMU Structural maintenance       | 5  |
| 3.816127869 | 1.8094 | E9B544     | tr E9B544 E9B544_LEIMU Uncharacterized protein C    | 12 |
| 4.040420423 | 1.8082 | E9B552     | tr E9B552 E9B552_LEIMU RuvB-like helicase OS=Leis   | 12 |
| 4.384247772 | 1.8082 | E9APV8;E8N | tr E9APV8 E9APV8_LEIMU Putative kinesin K39 OS=L    | 7  |
| 3.947489769 | 1.808  | E9AVU3;Q4I | tr E9AVU3 E9AVU3_LEIMU Putative dynein heavy ch     | 9  |
| 3.493986449 | 1.8079 | E9AR35     | tr E9AR35 E9AR35_LEIMU Uncharacterized protein C    | 3  |
| 4.833168362 | 1.8078 | E9B6J5     | tr E9B6J5 E9B6J5_LEIMU Riboflavin kinase/fmn aden   | 3  |
| 4.236916505 | 1.8077 | E9ALP2     | tr E9ALP2 E9ALP2_LEIMU Uncharacterized protein O    | 4  |
| 3.896326548 | 1.8076 | E9AMD5     | tr E9AMD5 E9AMD5_LEIMU Translation initiation fac   | 4  |
| 3.932708332 | 1.8076 | E9AZG6     | tr E9AZG6 E9AZG6_LEIMU Uncharacterized protein C    | 5  |

|             |        |            |                                                    |    |
|-------------|--------|------------|----------------------------------------------------|----|
| 4.512836712 | 1.8076 | E9B0J8     | tr E9B0J8 E9B0J8_LEIMU GrpE protein homolog OS=    | 7  |
| 3.586596513 | 1.8075 | E9AV88     | tr E9AV88 E9AV88_LEIMU Putative kinesin OS=Leish   | 9  |
| 3.875111806 | 1.807  | E9ASB0     | tr E9ASB0 E9ASB0_LEIMU Uncharacterized protein C   | 2  |
| 3.51127029  | 1.8069 | E9AM81     | tr E9AM81 E9AM81_LEIMU Putative Qc-SNARE prote     | 2  |
| 4.278198366 | 1.8069 | E9AY81     | tr E9AY81 E9AY81_LEIMU Putative dynein heavy cha   | 12 |
| 3.707426185 | 1.8066 | E9AQN7     | tr E9AQN7 E9AQN7_LEIMU Uncharacterized protein     | 7  |
| 4.215880082 | 1.8063 | E9AQ03     | tr E9AQ03 E9AQ03_LEIMU Uncharacterized protein (   | 2  |
| 3.671056216 | 1.8059 | E9ATM4     | tr E9ATM4 E9ATM4_LEIMU ATP-dependent RNA heli      | 7  |
| 4.024284435 | 1.8056 | E9B2X8     | tr E9B2X8 E9B2X8_LEIMU Uncharacterized protein C   | 3  |
| 3.705235347 | 1.8049 | E9B090     | tr E9B090 E9B090_LEIMU Serine/threonine-protein    | 4  |
| 3.875201355 | 1.8048 | E9AZQ1     | tr E9AZQ1 E9AZQ1_LEIMU DNA helicase OS=Leishma     | 4  |
| 3.248319517 | 1.8045 | E9B392     | tr E9B392 E9B392_LEIMU Putative ABC transporter (  | 3  |
| 4.026106585 | 1.8043 | E9B2X2     | tr E9B2X2 E9B2X2_LEIMU Putative heat shock protei  | 8  |
| 4.25968904  | 1.8038 | E9B4M3     | tr E9B4M3 E9B4M3_LEIMU Uncharacterized protein     | 2  |
| 4.368004033 | 1.8037 | E9B228     | tr E9B228 E9B228_LEIMU Uncharacterized protein C   | 3  |
| 3.146358947 | 1.8036 | E9AVV6     | tr E9AVV6 E9AVV6_LEIMU Putative translation initia | 5  |
| 3.327417114 | 1.8034 | E9B2P7     | tr E9B2P7 E9B2P7_LEIMU Uncharacterized protein C   | 2  |
| 3.859504223 | 1.8025 | E9AJN9     | tr E9AJN9 E9AJN9_LEIMU D-3-phosphoglycerate deh    | 6  |
| 3.535233818 | 1.8024 | E9AQI3     | tr E9AQI3 E9AQI3_LEIMU Uncharacterized protein O   | 2  |
| 3.864959358 | 1.8022 | E9AT60     | tr E9AT60 E9AT60_LEIMU Putative pre-mRNA splicin   | 2  |
| 3.414362256 | 1.8009 | E9AJY8     | tr E9AJY8 E9AJY8_LEIMU Uncharacterized protein OS  | 2  |
| 4.492540025 | 1.8007 | E9AVB9     | tr E9AVB9 E9AVB9_LEIMU V-type proton ATPase suk    | 7  |
| 3.971004731 | 1.8004 | E9AYM2     | tr E9AYM2 E9AYM2_LEIMU Uncharacterized protein     | 3  |
| 3.279273694 | 1.8004 | Q9GRU1;E9  | tr Q9GRU1 Q9GRU1_LEIME Mitogen-activated prote     | 2  |
| 3.931357121 | 1.8003 | E9AV22     | tr E9AV22 E9AV22_LEIMU Dihydrolipoamide acetyltr   | 5  |
| 4.001822768 | 1.8002 | E9B6L0     | tr E9B6L0 E9B6L0_LEIMU Uncharacterized protein O   | 5  |
| 3.805373488 | 1.8001 | E9APW8     | tr E9APW8 E9APW8_LEIMU Uncharacterized protein     | 3  |
| 4.278848866 | 1.8001 | E9ANH0     | tr E9ANH0 E9ANH0_LEIMU Proteasome subunit alph     | 4  |
| 4.351268829 | 1.7997 | E9AT99     | tr E9AT99 E9AT99_LEIMU 14-3-3 protein-like proteir | 10 |
| 3.576423549 | 1.7995 | E9AS33     | tr E9AS33 E9AS33_LEIMU Uncharacterized protein O   | 3  |
| 4.759742894 | 1.7993 | Q95ZD7;E9A | tr Q95ZD7 Q95ZD7_LEIME Phosphomannomutase O        | 2  |
| 3.425984459 | 1.7992 | E9B5C7     | tr E9B5C7 E9B5C7_LEIMU Glucose-6-phosphate 1-ep    | 4  |
| 3.604592588 | 1.7977 | E9ASM7     | tr E9ASM7 E9ASM7_LEIMU Putative ribosomal prote    | 3  |
| 3.931244202 | 1.7975 | E9ATN0     | tr E9ATN0 E9ATN0_LEIMU Uncharacterized protein (   | 3  |
| 3.953137836 | 1.7971 | E9B0H7     | tr E9B0H7 E9B0H7_LEIMU Uncharacterized protein (   | 3  |
| 3.977159487 | 1.797  | E9AR52     | tr E9AR52 E9AR52_LEIMU Kinesin-like protein OS=Le  | 2  |
| 3.878261869 | 1.7969 | E9APM8     | tr E9APM8 E9APM8_LEIMU Putative threonine synt     | 7  |
| 3.749145551 | 1.7969 | E9ANM5     | tr E9ANM5 E9ANM5_LEIMU Uncharacterized proteir     | 6  |
| 3.530075258 | 1.7967 | E9B4W6;E9f | tr E9B4W6 E9B4W6_LEIMU D-isomer specific 2-hydr    | 5  |
| 4.162792616 | 1.7964 | E9AX95     | tr E9AX95 E9AX95_LEIMU Ubiquitin carboxyl-termin   | 4  |
| 3.967294927 | 1.7964 | E9AU74     | tr E9AU74 E9AU74_LEIMU Uncharacterized protein (   | 8  |
| 3.867694999 | 1.7956 | E9AVA9     | tr E9AVA9 E9AVA9_LEIMU Putative adenylate kinase   | 9  |
| 3.396905627 | 1.7953 | E9AWU0     | tr E9AWU0 E9AWU0_LEIMU Putative replication fact   | 4  |
| 4.152216831 | 1.7944 | E9AZV4     | tr E9AZV4 E9AZV4_LEIMU Haloacid dehalogenase-lik   | 4  |
| 3.760329405 | 1.7941 | E9AZQ9     | tr E9AZQ9 E9AZQ9_LEIMU Uncharacterized protein (   | 7  |
| 3.950943917 | 1.7941 | E9AX48     | tr E9AX48 E9AX48_LEIMU Putative tubulin folding cc | 5  |
| 3.505550632 | 1.7938 | E9B1X2     | tr E9B1X2 E9B1X2_LEIMU Uncharacterized protein C   | 6  |
| 3.766134256 | 1.7937 | E9AVN0     | tr E9AVN0 E9AVN0_LEIMU Uncharacterized protein     | 4  |
| 3.434153931 | 1.7936 | E9AX32     | tr E9AX32 E9AX32_LEIMU Uncharacterized protein C   | 3  |
| 3.753374791 | 1.7928 | E9AL41     | tr E9AL41 E9AL41_LEIMU Uncharacterized protein O   | 5  |



|             |        |            |                        |                                 |   |
|-------------|--------|------------|------------------------|---------------------------------|---|
| 3.731308251 | 1.7923 | E9AQP5     | tr E9AQP5 E9AQP5_LEIMU | Uncharacterized protein         | 2 |
| 4.36427924  | 1.7921 | E9B4F8     | tr E9B4F8 E9B4F8_LEIMU | Small nuclear ribonucleoprotein | 2 |
| 3.592044201 | 1.792  | E9AJD9     | tr E9AJD9 E9AJD9_LEIMU | Putative long-chain-fatty-acid  | 7 |
| 3.476788303 | 1.7914 | E9AUV6;E9A | tr E9AUV6 E9AUV6_LEIMU | Putative aminoacylase O         | 3 |
| 3.570498487 | 1.7912 | E9B0P0     | tr E9B0P0 E9B0P0_LEIMU | Putative RNA-binding protein    | 8 |
| 3.899720303 | 1.7912 | E9B4I3     | tr E9B4I3 E9B4I3_LEIMU | Malate dehydrogenase OS=        | 6 |
| 4.019981629 | 1.7912 | E9B2L5     | tr E9B2L5 E9B2L5_LEIMU | Protein phosphatase meth        | 3 |
| 3.605210855 | 1.7912 | E9APH6     | tr E9APH6 E9APH6_LEIMU | Uncharacterized protein C       | 4 |
| 3.868166856 | 1.7905 | E9AMH4     | tr E9AMH4 E9AMH4_LEIMU | Uncharacterized protein         | 9 |
| 4.49038957  | 1.7905 | E9ANK3     | tr E9ANK3 E9ANK3_LEIMU | Putative cytochrome b5 C        | 2 |
| 4.062561155 | 1.7905 | E9AU73     | tr E9AU73 E9AU73_LEIMU | Uncharacterized protein C       | 3 |
| 3.615561877 | 1.7902 | E9AV00     | tr E9AV00 E9AV00_LEIMU | Uncharacterized protein C       | 3 |
| 3.470698453 | 1.7899 | E9ATJ4     | tr E9ATJ4 E9ATJ4_LEIMU | Uncharacterized protein O       | 2 |
| 3.202946027 | 1.7897 | E9ATC0     | tr E9ATC0 E9ATC0_LEIMU | Short chain dehydrogenas        | 3 |
| 3.673006264 | 1.7893 | E9B040     | tr E9B040 E9B040_LEIMU | Uncharacterized protein C       | 2 |
| 4.056827318 | 1.7892 | E9B6B3     | tr E9B6B3 E9B6B3_LEIMU | Uncharacterized protein C       | 2 |
| 3.684768184 | 1.7889 | E9AQT0     | tr E9AQT0 E9AQT0_LEIMU | Uncharacterized protein C       | 3 |
| 3.804356231 | 1.7889 | E9AXD0     | tr E9AXD0 E9AXD0_LEIMU | Putative ABC transporter        | 6 |
| 3.991810839 | 1.7888 | E9B1T9     | tr E9B1T9 E9B1T9_LEIMU | Uncharacterized protein O       | 6 |
| 3.382970217 | 1.7888 | E9B6J9     | tr E9B6J9 E9B6J9_LEIMU | Uncharacterized protein O       | 3 |
| 3.375326864 | 1.7887 | E9APA5     | tr E9APA5 E9APA5_LEIMU | Uncharacterized protein C       | 2 |
| 3.607019676 | 1.7884 | E9AL58     | tr E9AL58 E9AL58_LEIMU | Uncharacterized protein O       | 8 |
| 3.241753433 | 1.7884 | E9AXA5     | tr E9AXA5 E9AXA5_LEIMU | Uncharacterized protein C       | 2 |
| 3.777849915 | 1.7882 | E9AUN1     | tr E9AUN1 E9AUN1_LEIMU | Uncharacterized protein         | 2 |
| 4.093380901 | 1.7882 | E9ATI7     | tr E9ATI7 E9ATI7_LEIMU | Uncharacterized protein OS      | 8 |
| 3.29620508  | 1.7878 | E9B5P4     | tr E9B5P4 E9B5P4_LEIMU | Uncharacterized protein C       | 2 |
| 3.495933718 | 1.7873 | E9ATP6     | tr E9ATP6 E9ATP6_LEIMU | Uncharacterized protein C       | 8 |
| 3.606448404 | 1.7871 | E9AN19     | tr E9AN19 E9AN19_LEIMU | Uncharacterized protein C       | 2 |
| 5.454168125 | 1.7871 | E9B1X5     | tr E9B1X5 E9B1X5_LEIMU | Nucleosome assembly pro         | 5 |
| 3.741452522 | 1.7871 | E9AMC2     | tr E9AMC2 E9AMC2_LEIMU | Uncharacterized protein         | 5 |
| 3.734523918 | 1.7868 | E9B6R6     | tr E9B6R6 E9B6R6_LEIMU | Uncharacterized protein C       | 2 |
| 3.199728935 | 1.7867 | E9B592     | tr E9B592 E9B592_LEIMU | Uncharacterized protein C       | 2 |
| 3.560385398 | 1.7865 | E9ALIO     | tr E9ALIO E9ALIO_LEIMU | Phosphodiesterase OS=Leisl      | 5 |
| 3.570049802 | 1.7859 | E9AY76     | tr E9AY76 E9AY76_LEIMU | Uncharacterized protein C       | 3 |
| 4.309260714 | 1.7858 | E9AW04;Q4  | tr E9AW04 E9AW04_LEIMU | Peroxidoxin (Tryparedox         | 7 |
| 3.672220547 | 1.7857 | E9B134     | tr E9B134 E9B134_LEIMU | Putative replication factor     | 2 |
| 3.979447485 | 1.7855 | E9AKX7     | tr E9AKX7 E9AKX7_LEIMU | Uncharacterized protein C       | 3 |
| 3.6914296   | 1.7853 | E9AZK5     | tr E9AZK5 E9AZK5_LEIMU | Putative ribonuclease II-lik    | 6 |
| 3.904042491 | 1.7852 | E9ALM1     | tr E9ALM1 E9ALM1_LEIMU | Non-specific serine/threo       | 6 |
| 4.217401083 | 1.785  | E9AVE3     | tr E9AVE3 E9AVE3_LEIMU | Uncharacterized protein C       | 3 |
| 3.710761667 | 1.7847 | E9AM70     | tr E9AM70 E9AM70_LEIMU | GTP-binding protein-like        | 2 |
| 3.531211562 | 1.7846 | E9B510     | tr E9B510 E9B510_LEIMU | Uncharacterized protein C       | 4 |
| 4.291687273 | 1.7846 | E9AY44     | tr E9AY44 E9AY44_LEIMU | Uncharacterized protein C       | 4 |
| 3.305257223 | 1.7843 | E9B5K3     | tr E9B5K3 E9B5K3_LEIMU | Uncharacterized protein C       | 3 |
| 3.61622893  | 1.7843 | E9B3H1     | tr E9B3H1 E9B3H1_LEIMU | Uncharacterized protein C       | 5 |
| 3.402743846 | 1.7841 | E9ALG9     | tr E9ALG9 E9ALG9_LEIMU | Uncharacterized protein C       | 6 |
| 3.875075868 | 1.7838 | E9B1A0     | tr E9B1A0 E9B1A0_LEIMU | Putative ATP-dependent F        | 4 |
| 3.79602292  | 1.7833 | Q9NGK2;E9  | tr Q9NGK2 Q9NGK2_LEIAM | 40S ribosomal protein S         | 4 |
| 3.82382547  | 1.7829 | E9ARU3     | tr E9ARU3 E9ARU3_LEIMU | Uncharacterized protein         | 2 |
| 4.00624855  | 1.7823 | E9AXI8     | tr E9AXI8 E9AXI8_LEIMU | Uncharacterized protein OS      | 3 |

|             |        |            |                        |                             |    |
|-------------|--------|------------|------------------------|-----------------------------|----|
| 3.814322775 | 1.781  | E9B5P1;Q27 | tr E9B5P1 E9B5P1_LEIMU | Pyruvate kinase OS=Leishr   | 3  |
| 4.073470488 | 1.781  | E9AJP8     | tr E9AJP8 E9AJP8_LEIMU | Putative acetyltransferase  | 2  |
| 4.217149097 | 1.7809 | E9APL9     | tr E9APL9 E9APL9_LEIMU | Uncharacterized protein O   | 4  |
| 3.882601529 | 1.7807 | E9AZU1     | tr E9AZU1 E9AZU1_LEIMU | Uncharacterized protein C   | 3  |
| 3.526945042 | 1.7806 | E9AMQ3     | tr E9AMQ3 E9AMQ3_LEIMU | Uncharacterized protein     | 9  |
| 4.013675627 | 1.7804 | E9B3V4     | tr E9B3V4 E9B3V4_LEIMU | Uncharacterized protein C   | 2  |
| 3.823429805 | 1.7803 | E9B6N0     | tr E9B6N0 E9B6N0_LEIMU | Structural maintenance o    | 4  |
| 3.379773409 | 1.7801 | E9AUX2     | tr E9AUX2 E9AUX2_LEIMU | Uncharacterized protein C   | 2  |
| 4.588543366 | 1.7799 | E9AXK9     | tr E9AXK9 E9AXK9_LEIMU | Uncharacterized protein C   | 2  |
| 3.914674133 | 1.7796 | E9AUY4     | tr E9AUY4 E9AUY4_LEIMU | Uncharacterized protein C   | 3  |
| 4.047802339 | 1.7795 | E9B0S3     | tr E9B0S3 E9B0S3_LEIMU | Putative kinesin OS=Leishr  | 4  |
| 3.754991523 | 1.7794 | E9AQC1     | tr E9AQC1 E9AQC1_LEIMU | DNA topoisomerase 2 OS      | 5  |
| 3.855991298 | 1.7793 | E9B6N3     | tr E9B6N3 E9B6N3_LEIMU | Uncharacterized protein C   | 3  |
| 3.659355418 | 1.7792 | E9AWQ4;E9  | tr E9AWQ4 E9AWQ4_LEIMU | Kinesin-like protein OS=    | 6  |
| 3.683968903 | 1.779  | E9B4N8     | tr E9B4N8 E9B4N8_LEIMU | Uncharacterized protein C   | 15 |
| 3.625303771 | 1.7787 | E9AJL8     | tr E9AJL8 E9AJL8_LEIMU | Uncharacterized protein OS  | 2  |
| 3.611191209 | 1.7787 | E9B018     | tr E9B018 E9B018_LEIMU | Uncharacterized protein C   | 5  |
| 3.45236453  | 1.7783 | E9AX64     | tr E9AX64 E9AX64_LEIMU | Putative basal body comp    | 7  |
| 3.496127019 | 1.7778 | E9B694     | tr E9B694 E9B694_LEIMU | Uncharacterized protein C   | 8  |
| 4.019771647 | 1.7775 | E9AJV9     | tr E9AJV9 E9AJV9_LEIMU | Uncharacterized protein O   | 2  |
| 3.775953011 | 1.7771 | E9AL62;E9A | tr E9AL62 E9AL62_LEIMU | Putative 60S ribosomal prc  | 6  |
| 3.801293462 | 1.777  | E9B064     | tr E9B064 E9B064_LEIMU | Putative vacuolar ATP synt  | 14 |
| 3.516436586 | 1.777  | E9AW51     | tr E9AW51 E9AW51_LEIMU | Uncharacterized protein     | 3  |
| 4.048079436 | 1.7769 | E9APD3     | tr E9APD3 E9APD3_LEIMU | Putative proteasome regu    | 11 |
| 3.526081424 | 1.7768 | E9B2V3     | tr E9B2V3 E9B2V3_LEIMU | Uncharacterized protein C   | 2  |
| 4.070982779 | 1.7768 | E9B0J4     | tr E9B0J4 E9B0J4_LEIMU | Putative nuclear movemen    | 3  |
| 3.926274973 | 1.7749 | E9B4I2     | tr E9B4I2 E9B4I2_LEIMU | Putative malate dehydroge   | 3  |
| 3.703945347 | 1.7748 | E9AJU3     | tr E9AJU3 E9AJU3_LEIMU | Putative arginine N-methy   | 7  |
| 3.799866869 | 1.7743 | E9APJ0     | tr E9APJ0 E9APJ0_LEIMU | Putative chaperonin TCP20   | 15 |
| 3.330161921 | 1.7742 | E9AUK1     | tr E9AUK1 E9AUK1_LEIMU | Uncharacterized protein C   | 2  |
| 3.809958734 | 1.7741 | E9B1E5     | tr E9B1E5 E9B1E5_LEIMU | Putative CPSF-domain pro    | 7  |
| 4.093361412 | 1.774  | E9AN66     | tr E9AN66 E9AN66_LEIMU | Zinc binding dehydrogena    | 2  |
| 3.515787157 | 1.7737 | E9B3G8     | tr E9B3G8 E9B3G8_LEIMU | Putative 60S ribosomal pr   | 6  |
| 3.747813005 | 1.7729 | E9B4V7     | tr E9B4V7 E9B4V7_LEIMU | Uncharacterized protein C   | 3  |
| 4.196763038 | 1.7729 | E9B2P5     | tr E9B2P5 E9B2P5_LEIMU | Proteasome regulatory no    | 7  |
| 3.674703357 | 1.7728 | E9AM86     | tr E9AM86 E9AM86_LEIMU | Putative ATP-dependent      | 2  |
| 3.196153807 | 1.7723 | E9ATT7     | tr E9ATT7 E9ATT7_LEIMU | Uncharacterized protein C   | 2  |
| 3.856506204 | 1.7722 | E9AXP0     | tr E9AXP0 E9AXP0_LEIMU | Uncharacterized protein C   | 6  |
| 4.023948068 | 1.7719 | E9AT61     | tr E9AT61 E9AT61_LEIMU | Uncharacterized protein C   | 3  |
| 3.831429308 | 1.7715 | E9ATP0     | tr E9ATP0 E9ATP0_LEIMU | Uncharacterized protein C   | 6  |
| 4.252223108 | 1.7709 | E9AU26     | tr E9AU26 E9AU26_LEIMU | Uncharacterized protein C   | 6  |
| 4.445443685 | 1.7705 | E9B196     | tr E9B196 E9B196_LEIMU | Uncharacterized protein C   | 3  |
| 3.762471976 | 1.7703 | E9B2S6     | tr E9B2S6 E9B2S6_LEIMU | Putative ATP-dependent zi   | 10 |
| 3.443749089 | 1.7698 | E9AP32     | tr E9AP32 E9AP32_LEIMU | Uncharacterized protein C   | 2  |
| 3.472557686 | 1.7697 | E9AYZ5     | tr E9AYZ5 E9AYZ5_LEIMU | Putative isovaleryl-coA del | 11 |
| 4.436996952 | 1.7694 | E9AT88     | tr E9AT88 E9AT88_LEIMU | Putative ATP synthase OS=   | 4  |
| 3.412623046 | 1.7693 | E9AVM2     | tr E9AVM2 E9AVM2_LEIMU | Uncharacterized protein     | 6  |
| 3.588584072 | 1.7693 | Q6Y8H0;E9A | tr Q6Y8H0 Q6Y8H0_LEIME | AP-2 complex subunit alp    | 3  |
| 3.611883493 | 1.7692 | E9B5P3     | tr E9B5P3 E9B5P3_LEIMU | Putative 2-oxoisovalerate   | 6  |
| 3.705678459 | 1.7692 | E9AKS8     | tr E9AKS8 E9AKS8_LEIMU | Uncharacterized protein C   | 2  |

|             |        |            |                        |                              |    |
|-------------|--------|------------|------------------------|------------------------------|----|
| 4.197798906 | 1.7692 | E9AKL5;E8N | tr E9AKL5 E9AKL5_LEIMU | Uncharacterized protein O    | 5  |
| 3.542994907 | 1.7691 | E9AUG6     | tr E9AUG6 E9AUG6_LEIMU | Midasin OS=Leishmania i      | 13 |
| 4.112681697 | 1.7691 | E9ALG3     | tr E9ALG3 E9ALG3_LEIMU | Uncharacterized protein C    | 2  |
| 3.844752216 | 1.7688 | E9ATR2     | tr E9ATR2 E9ATR2_LEIMU | Uncharacterized protein C    | 5  |
| 3.482911745 | 1.7686 | E9AQQ7     | tr E9AQQ7 E9AQQ7_LEIMU | Uncharacterized protein      | 5  |
| 3.882951737 | 1.7686 | E9ARS6     | tr E9ARS6 E9ARS6_LEIMU | Putative pumilio protein C   | 2  |
| 4.032259171 | 1.7685 | E9AQD3     | tr E9AQD3 E9AQD3_LEIMU | Putative nucleolar RNA b     | 15 |
| 3.932808724 | 1.7685 | Q86PL6;E9A | tr Q86PL6 Q86PL6_LEIME | Paraflagellar rod protein 4  | 7  |
| 3.177887119 | 1.7684 | E9AZK7     | tr E9AZK7 E9AZK7_LEIMU | Uncharacterized protein C    | 5  |
| 3.369330277 | 1.768  | E9AXD9     | tr E9AXD9 E9AXD9_LEIMU | DNA-directed RNA polym       | 3  |
| 4.063007372 | 1.7676 | E9AVP4     | tr E9AVP4 E9AVP4_LEIMU | Putative proteasome regu     | 14 |
| 3.111716037 | 1.7675 | E9AW84     | tr E9AW84 E9AW84_LEIMU | 3-ketoacyl-CoA thiolase-     | 18 |
| 3.556879087 | 1.7674 | E9B2F2     | tr E9B2F2 E9B2F2_LEIMU | Uncharacterized protein O    | 10 |
| 3.394633104 | 1.7672 | E9APN9     | tr E9APN9 E9APN9_LEIMU | Uncharacterized protein (    | 3  |
| 3.88038761  | 1.7668 | E9B085     | tr E9B085 E9B085_LEIMU | Coatomer subunit gamma       | 17 |
| 3.960385422 | 1.7665 | E9AY91     | tr E9AY91 E9AY91_LEIMU | Uncharacterized protein C    | 4  |
| 3.614378725 | 1.7665 | E9B2B7     | tr E9B2B7 E9B2B7_LEIMU | Uncharacterized protein C    | 3  |
| 3.966599169 | 1.7663 | E9B6Q0     | tr E9B6Q0 E9B6Q0_LEIMU | Uncharacterized protein (    | 9  |
| 3.523310118 | 1.7662 | Q9GP07;O0  | tr Q9GP07 Q9GP07_LEIAM | Mitogen-activated protei     | 2  |
| 3.815793204 | 1.7661 | E9B6T5     | tr E9B6T5 E9B6T5_LEIMU | Uncharacterized protein O    | 2  |
| 3.548789827 | 1.7661 | E9B6Y8     | tr E9B6Y8 E9B6Y8_LEIMU | Putative phosphatidylserir   | 3  |
| 3.912353525 | 1.7656 | E9ATK5     | tr E9ATK5 E9ATK5_LEIMU | Uncharacterized protein C    | 9  |
| 3.049213066 | 1.7652 | E9AP42     | tr E9AP42 E9AP42_LEIMU | Mitochondrial DNA polym      | 3  |
| 3.936823263 | 1.7651 | E9B2I3     | tr E9B2I3 E9B2I3_LEIMU | Uncharacterized protein OS   | 2  |
| 3.655434856 | 1.7651 | E9B074     | tr E9B074 E9B074_LEIMU | Uncharacterized protein C    | 3  |
| 4.367647426 | 1.7649 | E9ALK3     | tr E9ALK3 E9ALK3_LEIMU | Putative GTP-binding prote   | 25 |
| 3.979443271 | 1.7641 | E9AM44     | tr E9AM44 E9AM44_LEIMU | Uncharacterized protein      | 10 |
| 3.596093577 | 1.7639 | E9ATV0     | tr E9ATV0 E9ATV0_LEIMU | Uncharacterized protein C    | 4  |
| 4.031443985 | 1.7638 | E9ANG2     | tr E9ANG2 E9ANG2_LEIMU | Uncharacterized protein      | 2  |
| 4.080305592 | 1.7635 | E9ARP5     | tr E9ARP5 E9ARP5_LEIMU | Protein kinase A catalytic   | 4  |
| 3.549183574 | 1.7634 | E9AZE5     | tr E9AZE5 E9AZE5_LEIMU | Uncharacterized protein O    | 2  |
| 3.601955049 | 1.763  | E9B108     | tr E9B108 E9B108_LEIMU | Sphingosine phosphate lyc    | 4  |
| 3.958403281 | 1.7619 | E9AVQ7     | tr E9AVQ7 E9AVQ7_LEIMU | Uncharacterized protein      | 13 |
| 3.903784324 | 1.7618 | E9AJV8     | tr E9AJV8 E9AJV8_LEIMU | Uncharacterized protein O    | 3  |
| 3.858162114 | 1.7616 | E9AMY1     | tr E9AMY1 E9AMY1_LEIMU | Uncharacterized protein      | 3  |
| 3.498815511 | 1.7609 | E9B3C4     | tr E9B3C4 E9B3C4_LEIMU | Uncharacterized protein C    | 4  |
| 3.734774986 | 1.7606 | E9B5K7     | tr E9B5K7 E9B5K7_LEIMU | Uncharacterized protein C    | 3  |
| 3.806742826 | 1.7605 | E9AYV2     | tr E9AYV2 E9AYV2_LEIMU | Putative calpain-like cyste  | 5  |
| 3.854936544 | 1.7605 | E9B2J2     | tr E9B2J2 E9B2J2_LEIMU | Uncharacterized protein O    | 2  |
| 3.875671156 | 1.7603 | E8NHE2     | tr E8NHE2 E8NHE2_LEIMU | Uncharacterized protein l    | 3  |
| 3.286846429 | 1.76   | E9ATS5     | tr E9ATS5 E9ATS5_LEIMU | Uncharacterized protein O    | 2  |
| 3.599295799 | 1.7597 | E9B155     | tr E9B155 E9B155_LEIMU | Putative chaperonin HSP6     | 10 |
| 3.887884984 | 1.7596 | E9B5P8     | tr E9B5P8 E9B5P8_LEIMU | Uncharacterized protein C    | 4  |
| 3.758313105 | 1.7596 | E9AM64     | tr E9AM64 E9AM64_LEIMU | Uncharacterized protein      | 8  |
| 4.322475689 | 1.7595 | E9B5D3     | tr E9B5D3 E9B5D3_LEIMU | DNA topoisomerase I OS=      | 5  |
| 4.220521736 | 1.7594 | Q86PL7;E9A | tr Q86PL7 Q86PL7_LEIME | Putative small GTP-binding   | 6  |
| 3.780591292 | 1.7593 | E9B760     | tr E9B760 E9B760_LEIMU | Uncharacterized protein C    | 10 |
| 3.952649406 | 1.7583 | E9ART0     | tr E9ART0 E9ART0_LEIMU | Uncharacterized protein C    | 2  |
| 4.301757712 | 1.7579 | E9AMIO     | tr E9AMIO E9AMIO_LEIMU | Uncharacterized protein (    | 13 |
| 3.742708123 | 1.7579 | E9AVX7     | tr E9AVX7 E9AVX7_LEIMU | Peptidyl-prolyl cis-trans is | 2  |

|             |        |            |                                                             |    |
|-------------|--------|------------|-------------------------------------------------------------|----|
| 3.647839869 | 1.7577 | E9B5Z9     | tr E9B5Z9 E9B5Z9_LEIMU Putative pre-mRNA splicing           | 5  |
| 3.71714836  | 1.7576 | E9B2I0     | tr E9B2I0 E9B2I0_LEIMU ATP-dependent RNA helicase           | 5  |
| 3.594412427 | 1.757  | E9B2W2     | tr E9B2W2 E9B2W2_LEIMU Chaperonin HSP60, mitochondrial      | 8  |
| 4.168607663 | 1.7566 | E9B039     | tr E9B039 E9B039_LEIMU Uncharacterized protein C            | 3  |
| 3.762367974 | 1.7566 | E9B5D2     | tr E9B5D2 E9B5D2_LEIMU Cleavage and polyadenylation         | 5  |
| 3.741855759 | 1.7565 | E9ANS3     | tr E9ANS3 E9ANS3_LEIMU Uncharacterized protein C            | 3  |
| 3.448536243 | 1.7565 | E9AVS2     | tr E9AVS2 E9AVS2_LEIMU Uncharacterized protein C            | 2  |
| 3.913953388 | 1.7562 | E9AXX1     | tr E9AXX1 E9AXX1_LEIMU Putative adenylate kinase            | 4  |
| 3.778850135 | 1.756  | E8NH10     | tr E8NH10 E8NH10_LEIMU 40S ribosomal protein S3a            | 13 |
| 3.414207565 | 1.7559 | E9B6T6     | tr E9B6T6 E9B6T6_LEIMU Uncharacterized protein C            | 3  |
| 3.751465195 | 1.7554 | E9AP12     | tr E9AP12 E9AP12_LEIMU Uncharacterized protein C            | 10 |
| 3.322405001 | 1.7552 | E9B5A8     | tr E9B5A8 E9B5A8_LEIMU Uncharacterized protein C            | 5  |
| 3.604583049 | 1.7551 | E9ASM0     | tr E9ASM0 E9ASM0_LEIMU Uncharacterized protein              | 7  |
| 3.720673298 | 1.7549 | E9AW70     | tr E9AW70 E9AW70_LEIMU Putative ubiquitin-activator         | 7  |
| 3.788581232 | 1.7545 | E9AXM7     | tr E9AXM7 E9AXM7_LEIMU Uncharacterized protein              | 8  |
| 4.347622935 | 1.7542 | E9B3K9     | tr E9B3K9 E9B3K9_LEIMU Autophagy-related protein            | 2  |
| 3.756700455 | 1.754  | E9B1C6     | tr E9B1C6 E9B1C6_LEIMU S-adenosylmethionine synthase        | 16 |
| 3.422763389 | 1.7539 | E9AXX0     | tr E9AXX0 E9AXX0_LEIMU Uncharacterized protein C            | 3  |
| 3.589236913 | 1.7536 | E9ALT4     | tr E9ALT4 E9ALT4_LEIMU Uncharacterized protein O            | 3  |
| 3.570136031 | 1.7536 | E9AYL0     | tr E9AYL0 E9AYL0_LEIMU Uncharacterized protein O            | 3  |
| 3.860665628 | 1.7534 | E9B483     | tr E9B483 E9B483_LEIMU Uncharacterized protein C            | 7  |
| 4.185074734 | 1.7531 | E9AXT4     | tr E9AXT4 E9AXT4_LEIMU Uncharacterized protein C            | 7  |
| 3.966319776 | 1.7527 | E9B3B0     | tr E9B3B0 E9B3B0_LEIMU Putative chaperonin alpha            | 20 |
| 3.882418962 | 1.7523 | E9AWK1     | tr E9AWK1 E9AWK1_LEIMU Uncharacterized protein              | 3  |
| 4.23594988  | 1.7522 | E9ASK9     | tr E9ASK9 E9ASK9_LEIMU Eukaryotic translation initiation    | 2  |
| 4.369077425 | 1.7519 | E9AT87     | tr E9AT87 E9AT87_LEIMU Uncharacterized protein C            | 5  |
| 3.630991045 | 1.7519 | E9AYP7     | tr E9AYP7 E9AYP7_LEIMU Uncharacterized protein C            | 5  |
| 3.784199175 | 1.7516 | E9API5     | tr E9API5 E9API5_LEIMU Kinesin-like protein OS=Leishmania   | 6  |
| 3.992708468 | 1.7515 | E9AKU0     | tr E9AKU0 E9AKU0_LEIMU Carbonic anhydrase OS=Leishmania     | 2  |
| 3.996886873 | 1.7514 | E9AWN2     | tr E9AWN2 E9AWN2_LEIMU Ubiquitin carboxyl-terminal          | 5  |
| 3.913367579 | 1.7512 | E9B5B2     | tr E9B5B2 E9B5B2_LEIMU Uncharacterized protein C            | 3  |
| 3.919611471 | 1.7512 | E9B201;E9B | tr E9B201 E9B201_LEIMU Succinyl-diaminopimelate             | 3  |
| 3.590586672 | 1.7511 | E9AVC7     | tr E9AVC7 E9AVC7_LEIMU 2-oxoisovalerate dehydrogenase       | 6  |
| 3.62119291  | 1.7506 | E9AZ85     | tr E9AZ85 E9AZ85_LEIMU Putative GTP binding protein         | 2  |
| 4.240056443 | 1.7505 | E9B489     | tr E9B489 E9B489_LEIMU Uncharacterized protein C            | 5  |
| 4.243584839 | 1.7502 | E9B2B6     | tr E9B2B6 E9B2B6_LEIMU Uncharacterized protein C            | 3  |
| 3.762951781 | 1.7501 | E9AM77     | tr E9AM77 E9AM77_LEIMU Transcription factor-like            | 13 |
| 3.151897428 | 1.7499 | E9B676     | tr E9B676 E9B676_LEIMU Uncharacterized protein C            | 3  |
| 3.718243786 | 1.7496 | E9AW96     | tr E9AW96 E9AW96_LEIMU Actin interacting protein            | 5  |
| 3.496269634 | 1.7493 | E9B576     | tr E9B576 E9B576_LEIMU Putative serine acetyltransferase    | 3  |
| 3.657835287 | 1.7492 | E9AJV2     | tr E9AJV2 E9AJV2_LEIMU Uncharacterized protein O            | 20 |
| 3.894871464 | 1.7491 | E9AQ24     | tr E9AQ24 E9AQ24_LEIMU Lysine--tRNA ligase OS=Leishmania    | 17 |
| 3.784480051 | 1.7488 | E9ATZ0     | tr E9ATZ0 E9ATZ0_LEIMU Uncharacterized protein O            | 2  |
| 3.856561114 | 1.7487 | Q7YWC7;E9  | tr Q7YWC7 Q7YWC7_LEIME Mu adaptin OS=Leishmania             | 3  |
| 4.122345068 | 1.7485 | E9AWG1     | tr E9AWG1 E9AWG1_LEIMU Uncharacterized protein              | 5  |
| 3.829448894 | 1.7484 | E9AJS8     | tr E9AJS8 E9AJS8_LEIMU Conserved TLD domain protein         | 2  |
| 3.803441393 | 1.7482 | E9ALY6;Q9L | tr E9ALY6 E9ALY6_LEIMU Putative ADP ribosylation factor     | 8  |
| 3.531540559 | 1.7481 | E9AR76     | tr E9AR76 E9AR76_LEIMU Hydrolase-like protein OS=Leishmania | 2  |
| 3.625364765 | 1.7477 | E9AQ76     | tr E9AQ76 E9AQ76_LEIMU Uncharacterized protein C            | 4  |
| 3.902185778 | 1.7475 | E9AYQ9     | tr E9AYQ9 E9AYQ9_LEIMU Uncharacterized protein C            | 2  |

|             |        |           |                                                      |    |
|-------------|--------|-----------|------------------------------------------------------|----|
| 3.81924058  | 1.7475 | E9AN48    | tr E9AN48 E9AN48_LEIMU Dihydroxyacetone kinase       | 4  |
| 3.897179391 | 1.7473 | E9ANJ3    | tr E9ANJ3 E9ANJ3_LEIMU Putative pumilio-repeat, R    | 10 |
| 3.352455592 | 1.7464 | E9B6I7    | tr E9B6I7 E9B6I7_LEIMU Putative glycerol kinase, gly | 2  |
| 3.97232823  | 1.7464 | E9AN63    | tr E9AN63 E9AN63_LEIMU Uncharacterized protein (     | 4  |
| 4.034203191 | 1.7456 | E9AYW0    | tr E9AYW0 E9AYW0_LEIMU Uncharacterized protein       | 2  |
| 3.59948865  | 1.7456 | E9AWI7    | tr E9AWI7 E9AWI7_LEIMU Uncharacterized protein (     | 3  |
| 3.196865525 | 1.7455 | E9B1L9    | tr E9B1L9 E9B1L9_LEIMU Uncharacterized protein O     | 5  |
| 3.736732622 | 1.745  | E9AMM1    | tr E9AMM1 E9AMM1_LEIMU Uncharacterized prote         | 9  |
| 3.66968123  | 1.7448 | E9ASC3    | tr E9ASC3 E9ASC3_LEIMU Putative L-ribulokinase OS    | 2  |
| 3.376029716 | 1.7447 | E9B3A1    | tr E9B3A1 E9B3A1_LEIMU Uncharacterized protein C     | 2  |
| 3.824480226 | 1.7447 | E9B5H0    | tr E9B5H0 E9B5H0_LEIMU Phosphomannomutase-li         | 2  |
| 3.344569865 | 1.7443 | E9B624    | tr E9B624 E9B624_LEIMU Uncharacterized protein C     | 7  |
| 3.842799162 | 1.7441 | E9AXV3    | tr E9AXV3 E9AXV3_LEIMU Uncharacterized protein (     | 2  |
| 3.508269709 | 1.7438 | E9AK58    | tr E9AK58 E9AK58_LEIMU Putative 60S ribosomal pr     | 8  |
| 3.210597676 | 1.7432 | E9AYY3    | tr E9AYY3 E9AYY3_LEIMU Glutaredoxin-like protein (   | 2  |
| 3.90232722  | 1.7423 | E9B159    | tr E9B159 E9B159_LEIMU Uncharacterized protein C     | 4  |
| 4.212227627 | 1.7422 | E9ANB3    | tr E9ANB3 E9ANB3_LEIMU RNA-binding protein-like      | 3  |
| 3.387890337 | 1.7421 | E9ALH7    | tr E9ALH7 E9ALH7_LEIMU Putative 60S ribosomal pr     | 6  |
| 3.863147422 | 1.7417 | E9ARM2    | tr E9ARM2 E9ARM2_LEIMU Uncharacterized protein       | 2  |
| 3.514322614 | 1.7414 | E9AVE5    | tr E9AVE5 E9AVE5_LEIMU Choline dehydrogenase, li     | 3  |
| 3.460861725 | 1.7413 | E9AUN5    | tr E9AUN5 E9AUN5_LEIMU 1,2-dihydroxy-3-keto-5-n      | 2  |
| 3.720566347 | 1.7413 | E9AZA2    | tr E9AZA2 E9AZA2_LEIMU Putative rRNA methyltran      | 6  |
| 3.937891791 | 1.7413 | E9ARW7    | tr E9ARW7 E9ARW7_LEIMU Putative aminopeptidas        | 7  |
| 3.735499084 | 1.741  | E9AJPO    | tr E9AJPO E9AJPO_LEIMU 2-aminoethylphosphonate:      | 4  |
| 4.033009775 | 1.7409 | E9B2I6    | tr E9B2I6 E9B2I6_LEIMU Uncharacterized protein OS    | 3  |
| 3.931148617 | 1.74   | E9AL29    | tr E9AL29 E9AL29_LEIMU Serine/threonine-protein p    | 7  |
| 4.0062928   | 1.7399 | E9AL40    | tr E9AL40 E9AL40_LEIMU Uncharacterized protein O     | 3  |
| 3.425539802 | 1.7395 | E9AZI5    | tr E9AZI5 E9AZI5_LEIMU Glycerol-3-phosphate dehy     | 4  |
| 3.695424319 | 1.7382 | E9ARW5    | tr E9ARW5 E9ARW5_LEIMU Uncharacterized proteir       | 5  |
| 4.312122983 | 1.7382 | E9B573    | tr E9B573 E9B573_LEIMU Regulatory subunit of prot    | 16 |
| 3.530718708 | 1.7381 | E9AXY6    | tr E9AXY6 E9AXY6_LEIMU Glycine cleavage system P     | 4  |
| 4.080564419 | 1.7379 | E9AJV4    | tr E9AJV4 E9AJV4_LEIMU Uncharacterized protein O     | 2  |
| 3.719243673 | 1.7377 | E9AW60    | tr E9AW60 E9AW60_LEIMU Uncharacterized protein       | 6  |
| 4.116924359 | 1.7372 | E9AZX3    | tr E9AZX3 E9AZX3_LEIMU Putative DEAD box RNA he      | 7  |
| 4.581458289 | 1.737  | E9AR10    | tr E9AR10 E9AR10_LEIMU Uncharacterized protein C     | 6  |
| 4.249726189 | 1.7369 | E9B110    | tr E9B110 E9B110_LEIMU ADP-ribosylation factor-lik   | 3  |
| 4.550048534 | 1.7368 | E9AXG0    | tr E9AXG0 E9AXG0_LEIMU Prefoldin subunit 4 OS=Le     | 3  |
| 3.878330381 | 1.7361 | E9ASB2    | tr E9ASB2 E9ASB2_LEIMU ATP-dependent zinc metal      | 2  |
| 3.747537371 | 1.7358 | E9AYH0    | tr E9AYH0 E9AYH0_LEIMU Uncharacterized protein (     | 4  |
| 4.29433067  | 1.7357 | E9AW01    | tr E9AW01 E9AW01_LEIMU Uncharacterized protein       | 11 |
| 3.62905805  | 1.7355 | E9B163    | tr E9B163 E9B163_LEIMU Putative aldehyde dehydro     | 10 |
| 3.596080479 | 1.7353 | E9B5J1    | tr E9B5J1 E9B5J1_LEIMU Uncharacterized protein OS    | 8  |
| 3.801447803 | 1.7351 | E9AT85    | tr E9AT85 E9AT85_LEIMU Fibrillarin OS=Leishmania     | 9  |
| 3.751100376 | 1.7349 | Q9GRU2;E9 | tr Q9GRU2 Q9GRU2_LEIME Mitogen-activated prote       | 2  |
| 4.23543463  | 1.7349 | E9AMI2    | tr E9AMI2 E9AMI2_LEIMU Uncharacterized protein (     | 4  |
| 3.380793869 | 1.7346 | E9AZL4    | tr E9AZL4 E9AZL4_LEIMU RAD50 DNA repair-like pro     | 6  |
| 4.091353222 | 1.7346 | E9B3S9    | tr E9B3S9 E9B3S9_LEIMU Putative nicotinate phosph    | 2  |
| 3.795663249 | 1.7341 | E9AQX9    | tr E9AQX9 E9AQX9_LEIMU Uncharacterized protein       | 8  |
| 4.000351693 | 1.7338 | E9AQG2    | tr E9AQG2 E9AQG2_LEIMU Putative peroxisome assi      | 3  |
| 3.702881562 | 1.7338 | E9B677    | tr E9B677 E9B677_LEIMU Uncharacterized protein C     | 11 |

|             |        |            |                                                       |    |
|-------------|--------|------------|-------------------------------------------------------|----|
| 3.832850796 | 1.7336 | E9AX93     | tr E9AX93 E9AX93_LEIMU Cleavage and polyadenyla       | 8  |
| 3.671211857 | 1.7336 | E9AZU3     | tr E9AZU3 E9AZU3_LEIMU Putative p450 reductase (      | 3  |
| 3.592198158 | 1.733  | E9AUK9     | tr E9AUK9 E9AUK9_LEIMU Putative serine/threonine      | 7  |
| 3.907224155 | 1.7326 | E9AJJ9     | tr E9AJJ9 E9AJJ9_LEIMU Putative casein kinase II, alp | 3  |
| 3.938138968 | 1.7323 | E9B1D8     | tr E9B1D8 E9B1D8_LEIMU Uncharacterized protein (      | 4  |
| 3.780276931 | 1.7322 | E9AU01     | tr E9AU01 E9AU01_LEIMU Putative RNA helicase OS:      | 4  |
| 3.59130046  | 1.7318 | E9AJ91     | tr E9AJ91 E9AJ91_LEIMU Putative carboxylase OS=Le     | 6  |
| 3.545441726 | 1.7314 | E9AX02     | tr E9AX02 E9AX02_LEIMU Uncharacterized protein C      | 2  |
| 3.431235729 | 1.7314 | E9AMI9     | tr E9AMI9 E9AMI9_LEIMU Uncharacterized protein (      | 5  |
| 3.681171181 | 1.7313 | E9AY79     | tr E9AY79 E9AY79_LEIMU Uncharacterized protein C      | 2  |
| 3.67194183  | 1.7313 | E9B5K1     | tr E9B5K1 E9B5K1_LEIMU Putative ubiquitin hydrola     | 8  |
| 3.648943862 | 1.7312 | E9B689     | tr E9B689 E9B689_LEIMU Uncharacterized protein C      | 2  |
| 4.20757071  | 1.731  | E9AXQ4     | tr E9AXQ4 E9AXQ4_LEIMU Uncharacterized protein (      | 4  |
| 3.101734302 | 1.7303 | E9ARG9     | tr E9ARG9 E9ARG9_LEIMU Uncharacterized protein (      | 3  |
| 4.576315997 | 1.7303 | E9ALD1     | tr E9ALD1 E9ALD1_LEIMU Proteasome regulatory no       | 2  |
| 3.517182926 | 1.7303 | E9AMU6     | tr E9AMU6 E9AMU6_LEIMU Uncharacterized protein        | 2  |
| 3.28858074  | 1.7301 | E9AXA1     | tr E9AXA1 E9AXA1_LEIMU Uncharacterized protein (      | 3  |
| 3.493531595 | 1.7298 | E9AQ34;E9A | tr E9AQ34 E9AQ34_LEIMU Uncharacterized protein (      | 2  |
| 4.025928563 | 1.7298 | E9AV10     | tr E9AV10 E9AV10_LEIMU Uncharacterized protein C      | 10 |
| 3.613566815 | 1.7289 | E9AYA1     | tr E9AYA1 E9AYA1_LEIMU Uncharacterized protein C      | 3  |
| 4.492798331 | 1.7285 | E9ALB1     | tr E9ALB1 E9ALB1_LEIMU Uncharacterized protein O      | 4  |
| 3.616289544 | 1.7284 | E9B6K3     | tr E9B6K3 E9B6K3_LEIMU Uncharacterized protein C      | 2  |
| 3.884878088 | 1.7283 | E9AN88     | tr E9AN88 E9AN88_LEIMU Uncharacterized protein (      | 3  |
| 3.983664914 | 1.7281 | E9B1J0     | tr E9B1J0 E9B1J0_LEIMU Putative calpain-like cysteir  | 5  |
| 3.959615061 | 1.7272 | E9AR41     | tr E9AR41 E9AR41_LEIMU Uncharacterized protein C      | 6  |
| 4.036168064 | 1.7271 | E9B1B7     | tr E9B1B7 E9B1B7_LEIMU Uncharacterized protein C      | 8  |
| 3.550973225 | 1.727  | E9AY52     | tr E9AY52 E9AY52_LEIMU Uncharacterized protein C      | 2  |
| 3.922246526 | 1.7264 | E9B6C0     | tr E9B6C0 E9B6C0_LEIMU Uncharacterized protein C      | 8  |
| 3.489821694 | 1.7259 | E9AU45     | tr E9AU45 E9AU45_LEIMU Uncharacterized protein (      | 5  |
| 3.798877228 | 1.7257 | E9AQV4     | tr E9AQV4 E9AQV4_LEIMU Uncharacterized protein        | 5  |
| 4.08067758  | 1.7255 | E9AJE9     | tr E9AJE9 E9AJE9_LEIMU Uncharacterized protein OS     | 3  |
| 3.888986617 | 1.7249 | E9AZC6     | tr E9AZC6 E9AZC6_LEIMU Uncharacterized protein C      | 3  |
| 4.026622468 | 1.7249 | E9ALG0     | tr E9ALG0 E9ALG0_LEIMU Uncharacterized protein C      | 2  |
| 3.556636782 | 1.7248 | E9B3P7     | tr E9B3P7 E9B3P7_LEIMU Uncharacterized protein C      | 8  |
| 3.342562682 | 1.7243 | E9ATL2     | tr E9ATL2 E9ATL2_LEIMU Uncharacterized protein O      | 5  |
| 3.791946858 | 1.7243 | E9AZ12     | tr E9AZ12 E9AZ12_LEIMU Uncharacterized protein C      | 6  |
| 3.730494322 | 1.7242 | E9B1L4     | tr E9B1L4 E9B1L4_LEIMU Uncharacterized protein O      | 3  |
| 3.371062724 | 1.7242 | E9B1G7     | tr E9B1G7 E9B1G7_LEIMU Putative nucleolar proteir     | 4  |
| 3.699376079 | 1.724  | E9B6U3     | tr E9B6U3 E9B6U3_LEIMU Polyadenylate-binding pro      | 14 |
| 3.923173686 | 1.7238 | E9ANB6     | tr E9ANB6 E9ANB6_LEIMU Uncharacterized protein (      | 3  |
| 3.709946381 | 1.7236 | E9B2Z7     | tr E9B2Z7 E9B2Z7_LEIMU Uncharacterized protein O      | 3  |
| 3.441244145 | 1.7235 | E9B407     | tr E9B407 E9B407_LEIMU Transcription activator OS:    | 10 |
| 3.980174617 | 1.7232 | E9B1D2     | tr E9B1D2 E9B1D2_LEIMU Putative serine/threonine      | 4  |
| 3.952800776 | 1.7227 | E9AM68     | tr E9AM68 E9AM68_LEIMU Uncharacterized protein        | 15 |
| 3.800467851 | 1.7225 | E9AL38     | tr E9AL38 E9AL38_LEIMU Putative ubiquitin-protein     | 3  |
| 4.173582955 | 1.7222 | E9B2W9     | tr E9B2W9 E9B2W9_LEIMU Uncharacterized protein        | 8  |
| 3.650441847 | 1.7222 | E9ARK0     | tr E9ARK0 E9ARK0_LEIMU Putative 60S ribosomal pr      | 5  |
| 3.293318301 | 1.7222 | E9B2X4     | tr E9B2X4 E9B2X4_LEIMU Putative 1-acyl-sn-glycerol    | 4  |
| 4.424348524 | 1.7221 | E9AVZ5     | tr E9AVZ5 E9AVZ5_LEIMU Putative CCR4 associated       | 4  |
| 3.760615674 | 1.7219 | E9ARP8     | tr E9ARP8 E9ARP8_LEIMU Putative methyltransferas      | 3  |

|             |        |            |                        |                                 |    |
|-------------|--------|------------|------------------------|---------------------------------|----|
| 3.611854449 | 1.7218 | E9ATB0     | tr E9ATB0 E9ATB0_LEIMU | Putative actin-like protein     | 2  |
| 3.793330383 | 1.7218 | E9AL86     | tr E9AL86 E9AL86_LEIMU | Uncharacterized protein O       | 5  |
| 4.224173033 | 1.7218 | E9AXF0     | sp E9AXF0 IF5A_LEIMU   | Eukaryotic translation initiati | 3  |
| 4.384058676 | 1.7217 | E9B2W1     | tr E9B2W1 E9B2W1_LEIMU | Putative rab11B GTPase          | 2  |
| 3.800876746 | 1.7209 | E9AUY5     | tr E9AUY5 E9AUY5_LEIMU | Uncharacterized protein C       | 6  |
| 3.529593657 | 1.7208 | E9AMC1     | tr E9AMC1 E9AMC1_LEIMU | Uncharacterized protein         | 4  |
| 3.973724858 | 1.7201 | E9AQL1;Q9M | tr E9AQL1 E9AQL1_LEIMU | Dihydroorotate dehydrog         | 4  |
| 3.776213579 | 1.72   | E9AYW4     | tr E9AYW4 E9AYW4_LEIMU | Uncharacterized protein         | 4  |
| 3.588417132 | 1.7199 | E9AL60     | tr E9AL60 E9AL60_LEIMU | Uncharacterized protein O       | 5  |
| 3.752787557 | 1.7199 | E9B3F8     | tr E9B3F8 E9B3F8_LEIMU | Uncharacterized protein O       | 2  |
| 3.760286789 | 1.7198 | E9AR04     | tr E9AR04 E9AR04_LEIMU | Uncharacterized protein C       | 2  |
| 3.63128779  | 1.7196 | E9AV49;A0A | tr E9AV49 E9AV49_LEIMU | Putative methionyl-tRNA :       | 13 |
| 4.430440376 | 1.7195 | E9B072     | tr E9B072 E9B072_LEIMU | Eukaryotic translation initi    | 3  |
| 3.817829651 | 1.7193 | E9B1W5     | tr E9B1W5 E9B1W5_LEIMU | Uncharacterized protein         | 2  |
| 3.461792261 | 1.7191 | E9AL42     | tr E9AL42 E9AL42_LEIMU | Uncharacterized protein O       | 2  |
| 3.874217464 | 1.7186 | E9AK09     | tr E9AK09 E9AK09_LEIMU | Uncharacterized protein C       | 3  |
| 4.611190572 | 1.7185 | E9B5E2     | tr E9B5E2 E9B5E2_LEIMU | Uncharacterized protein O       | 2  |
| 3.032832428 | 1.7183 | E9AYA4     | tr E9AYA4 E9AYA4_LEIMU | Uncharacterized protein C       | 2  |
| 3.494392465 | 1.7182 | E9ASG5     | tr E9ASG5 E9ASG5_LEIMU | Uncharacterized protein C       | 2  |
| 3.931273545 | 1.7181 | E9B2L3     | tr E9B2L3 E9B2L3_LEIMU | Ethanolamine-phosphate c        | 6  |
| 3.803696313 | 1.7181 | E9B1W1     | tr E9B1W1 E9B1W1_LEIMU | Diphthine synthase-like         | 5  |
| 3.635788655 | 1.7181 | E9B4P2     | tr E9B4P2 E9B4P2_LEIMU | Uncharacterized protein C       | 3  |
| 4.244309921 | 1.718  | E9AZ24     | tr E9AZ24 E9AZ24_LEIMU | Putative translation initiat    | 4  |
| 3.840536818 | 1.7178 | E9B3L1     | tr E9B3L1 E9B3L1_LEIMU | Putative ATP-binding casse      | 8  |
| 3.602958161 | 1.7175 | E9AWJ0     | tr E9AWJ0 E9AWJ0_LEIMU | Uncharacterized protein         | 2  |
| 3.72933421  | 1.7168 | E9ANI7     | tr E9ANI7 E9ANI7_LEIMU | Ribosome biogenesis prote       | 5  |
| 3.244236783 | 1.7167 | E9AZD1     | tr E9AZD1 E9AZD1_LEIMU | Uncharacterized protein C       | 2  |
| 3.820900321 | 1.7166 | E9B1P7     | tr E9B1P7 E9B1P7_LEIMU | Uncharacterized protein C       | 6  |
| 3.719499715 | 1.7161 | E9ANN3     | tr E9ANN3 E9ANN3_LEIMU | Uncharacterized protein         | 5  |
| 3.720685433 | 1.7156 | E9B0G6     | tr E9B0G6 E9B0G6_LEIMU | WD-40 repeat protein OS:        | 3  |
| 3.639006185 | 1.7154 | E9ANZ3     | tr E9ANZ3 E9ANZ3_LEIMU | Serine/threonine-protein        | 2  |
| 3.476331052 | 1.7153 | E9ALB0     | tr E9ALB0 E9ALB0_LEIMU | Uncharacterized protein O       | 3  |
| 3.394857143 | 1.7153 | E9B4W9     | tr E9B4W9 E9B4W9_LEIMU | Uncharacterized protein         | 2  |
| 3.175129949 | 1.7148 | E9AQT7     | tr E9AQT7 E9AQT7_LEIMU | Uncharacterized protein C       | 2  |
| 3.732593836 | 1.7146 | E9APK2     | tr E9APK2 E9APK2_LEIMU | Uncharacterized protein C       | 4  |
| 3.571072535 | 1.714  | E9ALM8     | tr E9ALM8 E9ALM8_LEIMU | Putative fumarate hydrat        | 2  |
| 3.620283657 | 1.714  | E9AX91     | tr E9AX91 E9AX91_LEIMU | Uncharacterized protein C       | 3  |
| 3.713425067 | 1.7137 | E9AXI7     | tr E9AXI7 E9AXI7_LEIMU | Uncharacterized protein OS      | 3  |
| 3.000790325 | 1.7136 | E9AW83     | tr E9AW83 E9AW83_LEIMU | Uncharacterized protein         | 4  |
| 3.907136052 | 1.7135 | E9B754     | tr E9B754 E9B754_LEIMU | Uncharacterized protein C       | 2  |
| 3.803851957 | 1.7135 | E9B6I5     | tr E9B6I5 E9B6I5_LEIMU | Putative ubiquitin-activati     | 16 |
| 3.560870318 | 1.7134 | E9B207     | tr E9B207 E9B207_LEIMU | Uncharacterized protein C       | 3  |
| 3.570606907 | 1.7128 | E9AWL7     | tr E9AWL7 E9AWL7_LEIMU | Dynein intermediate-cha         | 5  |
| 3.993376397 | 1.7127 | E9AWV6     | tr E9AWV6 E9AWV6_LEIMU | Uncharacterized proteir         | 5  |
| 3.364991203 | 1.7125 | E9AR50     | tr E9AR50 E9AR50_LEIMU | GMP reductase OS=Leishr         | 13 |
| 3.76794226  | 1.7123 | E9ASR8     | tr E9ASR8 E9ASR8_LEIMU | Uncharacterized protein C       | 2  |
| 4.167710151 | 1.7122 | E9AW16     | tr E9AW16 E9AW16_LEIMU | Uncharacterized protein         | 3  |
| 3.692548764 | 1.7119 | E9AKW6     | tr E9AKW6 E9AKW6_LEIMU | Putative acyl-coenzyme          | 7  |
| 3.593382189 | 1.7117 | E9ARJ4     | tr E9ARJ4 E9ARJ4_LEIMU | Uncharacterized protein O:      | 3  |
| 3.516093411 | 1.7117 | E9B6F1     | tr E9B6F1 E9B6F1_LEIMU | Uncharacterized protein O       | 3  |

|             |        |            |                                |                             |    |
|-------------|--------|------------|--------------------------------|-----------------------------|----|
| 3.405930955 | 1.7116 | E9AKY3     | tr E9AKY3 E9AKY3_LEIMU         | Uncharacterized protein C   | 2  |
| 3.600023114 | 1.7116 | E9AT02;A0A | tr E9AT02 E9AT02_LEIMU         | Developmentally regulated   | 8  |
| 3.700439351 | 1.7114 | E9ARJ9;E9A | tr E9ARJ9 E9ARJ9_LEIMU         | Putative ATP-dependent zi   | 3  |
| 3.814786488 | 1.7114 | E9AMS7     | tr E9AMS7 E9AMS7_LEIMU         | Uncharacterized protein     | 8  |
| 3.658863424 | 1.7106 | E9ATD6     | tr E9ATD6 E9ATD6_LEIMU         | Putative signal recogniti   | 7  |
| 3.386279616 | 1.7105 | E9AW40     | tr E9AW40 E9AW40_LEIMU         | Putative NADP-depende       | 10 |
| 3.965459051 | 1.71   | E9AKM7     | tr E9AKM7 E9AKM7_LEIMU         | Protein phosphatase typ     | 4  |
| 3.769080133 | 1.71   | E9ARF2     | tr E9ARF2 E9ARF2_LEIMU         | Serine/threonine protein    | 2  |
| 3.209314186 | 1.7093 | E9ALF6     | tr E9ALF6 E9ALF6_LEIMU         | Uncharacterized protein O   | 6  |
| 4.210989915 | 1.7088 | E9AT45     | tr E9AT45 E9AT45_LEIMU         | Uncharacterized protein C   | 4  |
| 3.82768297  | 1.7088 | E9ASR0     | tr E9ASR0 E9ASR0_LEIMU         | Uncharacterized protein C   | 3  |
| 3.765539303 | 1.7088 | E9AXH4     | tr E9AXH4 E9AXH4_LEIMU         | Tubulin gamma chain OS=     | 3  |
| 2.903389293 | 1.7086 | E9AVK5     | tr E9AVK5 E9AVK5_LEIMU         | Uncharacterized protein C   | 3  |
| 3.635114212 | 1.7084 | E9AR65     | tr E9AR65 E9AR65_LEIMU         | Putative ATP-dependent F    | 10 |
| 3.497888802 | 1.7082 | E9AYZ0     | tr E9AYZ0 E9AYZ0_LEIMU         | Putative 2-oxoglutarate de  | 16 |
| 3.589897671 | 1.7082 | E9B2Q9     | tr E9B2Q9 E9B2Q9_LEIMU         | Cleavage and polyadenyl     | 10 |
| 4.086100756 | 1.7079 | E9B187     | tr E9B187 E9B187_LEIMU         | Putative valyl-tRNA synthe  | 6  |
| 3.478080953 | 1.7076 | E9AK86     | tr E9AK86 E9AK86_LEIMU         | Acyltransferase-like prote  | 4  |
| 4.189809053 | 1.7075 | E9B217     | tr E9B217 E9B217_LEIMU         | Uncharacterized protein C   | 3  |
| 4.32524039  | 1.7072 | E9AY61     | tr E9AY61 E9AY61_LEIMU         | Putative asparagine synthe  | 10 |
| 3.834363208 | 1.7071 | E9ASP5;E9A | tr E9ASP5 E9ASP5_LEIMU         | Putative 40S ribosomal pro  | 7  |
| 3.280167422 | 1.7068 | E9AW65     | tr E9AW65 E9AW65_LEIMU         | Uncharacterized protein     | 2  |
| 3.533928863 | 1.7067 | E9B1T6     | tr E9B1T6 E9B1T6_LEIMU         | Uncharacterized protein O   | 6  |
| 3.359570713 | 1.7067 | E9B076     | tr E9B076 E9B076_LEIMU         | Uncharacterized protein C   | 2  |
| 3.992927785 | 1.7067 | E9B0B3     | tr E9B0B3 E9B0B3_LEIMU         | Glutamate dehydrogenase     | 11 |
| 3.866028947 | 1.7066 | E9AYH5     | tr E9AYH5 E9AYH5_LEIMU         | Putative mitotubule-asso    | 18 |
| 4.191958121 | 1.7064 | Q5MY89;E9  | tr Q5MY89 Q5MY89_LEIAM         | Replication protein A su    | 5  |
| 3.899569639 | 1.7063 | E9AQ99;E9E | tr E9AQ99 E9AQ99_LEIMU         | 60S ribosomal protein L6    | 5  |
| 4.711531228 | 1.7063 | A0A0C5D11  | tr A0A0C5D115 A0A0C5D115_LEIAM | Seryl-tRNA synt             | 2  |
| 3.55309794  | 1.7058 | E9AQU6     | tr E9AQU6 E9AQU6_LEIMU         | DNA-directed rna polym      | 13 |
| 3.120259958 | 1.7057 | E9AYN0     | tr E9AYN0 E9AYN0_LEIMU         | Uncharacterized protein C   | 3  |
| 4.036534865 | 1.7045 | E9AQQ1;E9  | tr E9AQQ1 E9AQQ1_LEIMU         | Putative flagellar calciu   | 4  |
| 4.189368641 | 1.7044 | E9B262     | tr E9B262 E9B262_LEIMU         | Serine/threonine-protein    | 3  |
| 2.880913774 | 1.7039 | E9AN90     | tr E9AN90 E9AN90_LEIMU         | Uncharacterized protein C   | 2  |
| 3.575176826 | 1.7037 | E9B5D6     | tr E9B5D6 E9B5D6_LEIMU         | Uncharacterized protein C   | 3  |
| 4.01436453  | 1.7035 | E9ARX7     | tr E9ARX7 E9ARX7_LEIMU         | Kinesin-like protein OS=Le  | 5  |
| 3.830659988 | 1.7027 | E9ALJ6     | tr E9ALJ6 E9ALJ6_LEIMU         | Uncharacterized protein OS  | 2  |
| 3.659359168 | 1.7027 | E9AWJ8     | tr E9AWJ8 E9AWJ8_LEIMU         | Uncharacterized protein     | 2  |
| 3.870434355 | 1.7023 | E9AZU7     | tr E9AZU7 E9AZU7_LEIMU         | Putative phenylalanine-4-   | 8  |
| 3.351457178 | 1.7022 | E9B442     | tr E9B442 E9B442_LEIMU         | Uncharacterized protein C   | 6  |
| 3.875785031 | 1.7022 | E9AMC3     | tr E9AMC3 E9AMC3_LEIMU         | Uncharacterized protein     | 2  |
| 3.744095357 | 1.702  | E9AJF2     | tr E9AJF2 E9AJF2_LEIMU         | Mitochondrial processing p  | 7  |
| 4.1187152   | 1.7016 | E9ATU8     | tr E9ATU8 E9ATU8_LEIMU         | Uncharacterized protein C   | 7  |
| 4.005742874 | 1.7015 | E9B0V4     | tr E9B0V4 E9B0V4_LEIMU         | Putative splicing factor 3a | 5  |
| 3.784947208 | 1.7014 | E9AZ50     | tr E9AZ50 E9AZ50_LEIMU         | Uncharacterized protein C   | 6  |
| 3.002134061 | 1.7013 | E9AR64     | tr E9AR64 E9AR64_LEIMU         | Uncharacterized protein C   | 2  |
| 3.652486158 | 1.7012 | E9AVY2     | tr E9AVY2 E9AVY2_LEIMU         | Putative ATP-dependent I    | 7  |
| 3.916715413 | 1.7012 | E9AV44     | tr E9AV44 E9AV44_LEIMU         | Proteasome regulatory nc    | 15 |
| 3.796792332 | 1.7008 | E9AR97     | tr E9AR97 E9AR97_LEIMU         | RNA cytidine acetyltransfe  | 15 |
| 3.858042253 | 1.7008 | E9B0H1;E9A | tr E9B0H1 E9B0H1_LEIMU         | Putative aspartyl-tRNA sy   | 17 |



|             |        |            |                                                    |    |
|-------------|--------|------------|----------------------------------------------------|----|
| 4.058919928 | 1.7007 | E9AZ73     | tr E9AZ73 E9AZ73_LEIMU Putative eukaryotic transla | 16 |
| 4.41061396  | 1.7005 | E9B2Z9     | tr E9B2Z9 E9B2Z9_LEIMU Uncharacterized protein O   | 8  |
| 3.707026945 | 1.7005 | E9AT28     | tr E9AT28 E9AT28_LEIMU Nuclear pore protein OS=L   | 6  |
| 4.117273179 | 1.7005 | E9B0N0     | tr E9B0N0 E9B0N0_LEIMU Putative ubiquitin fusion ( | 2  |
| 3.532471632 | 1.7004 | E9ALQ4     | tr E9ALQ4 E9ALQ4_LEIMU Uncharacterized protein C   | 3  |
| 3.534217748 | 1.7002 | E9B405;A0A | tr E9B405 E9B405_LEIMU Thiamine biosynthesis-like  | 8  |
| 4.71625998  | 1.6999 | E9ATP9     | tr E9ATP9 E9ATP9_LEIMU Ribosome assembly factor    | 5  |
| 3.54721785  | 1.6999 | E9AU22     | tr E9AU22 E9AU22_LEIMU Uncharacterized protein C   | 9  |
| 3.581925412 | 1.6997 | E9ASW4     | tr E9ASW4 E9ASW4_LEIMU Putative T-lymphocyte tr    | 3  |
| 3.356524826 | 1.6997 | E9AT27     | tr E9AT27 E9AT27_LEIMU Chromatin assembly facto    | 2  |
| 4.083565883 | 1.6996 | E9B545     | tr E9B545 E9B545_LEIMU Uncharacterized protein C   | 9  |
| 3.613617804 | 1.6992 | E9ARD8     | tr E9ARD8 E9ARD8_LEIMU Uncharacterized protein C   | 14 |
| 3.95468071  | 1.6991 | Q9GRU3;E9  | tr Q9GRU3 Q9GRU3_LEIME Mitogen-activated prote     | 2  |
| 4.451848157 | 1.6986 | E9B757     | tr E9B757 E9B757_LEIMU Putative GTP-binding prot   | 3  |
| 3.713092967 | 1.6984 | E9AJY5     | tr E9AJY5 E9AJY5_LEIMU Putative cAMP-specific phc  | 2  |
| 3.599152518 | 1.6982 | E9AV43     | tr E9AV43 E9AV43_LEIMU Uncharacterized protein C   | 2  |
| 3.658113054 | 1.6979 | E9APC2     | tr E9APC2 E9APC2_LEIMU Putative AMP deaminase      | 3  |
| 3.15628655  | 1.6975 | E9AJX2     | tr E9AJX2 E9AJX2_LEIMU Uncharacterized protein O'  | 5  |
| 4.120883977 | 1.6975 | E9AYR1     | tr E9AYR1 E9AYR1_LEIMU Cytochrome p450-like pro    | 3  |
| 4.268224121 | 1.6975 | E9B2N5     | tr E9B2N5 E9B2N5_LEIMU Putative exportin 1 OS=Le   | 4  |
| 3.776056938 | 1.6973 | E9ARD0;I3V | tr E9ARD0 E9ARD0_LEIMU Elongation factor 1-alpha   | 29 |
| 3.823768626 | 1.6972 | E9AX49     | tr E9AX49 E9AX49_LEIMU 3-oxoacyl-(Acyl-carrier pro | 4  |
| 3.525864022 | 1.6966 | E9ARY6     | tr E9ARY6 E9ARY6_LEIMU Uncharacterized protein C   | 2  |
| 4.38020925  | 1.6966 | E9AT17     | tr E9AT17 E9AT17_LEIMU Uncharacterized protein C   | 2  |
| 3.784521304 | 1.6965 | E9B6F2     | tr E9B6F2 E9B6F2_LEIMU Putative acyl-CoA dehydro   | 5  |
| 3.550489851 | 1.6964 | E9B346     | tr E9B346 E9B346_LEIMU Uncharacterized protein C   | 3  |
| 4.396286357 | 1.6961 | E9APA2     | tr E9APA2 E9APA2_LEIMU Uncharacterized protein C   | 6  |
| 3.644134855 | 1.6961 | E9B050     | tr E9B050 E9B050_LEIMU Uncharacterized protein C   | 3  |
| 3.555283624 | 1.696  | E9AVR1     | tr E9AVR1 E9AVR1_LEIMU Putative NADH-cytochro      | 11 |
| 3.932119981 | 1.6956 | E9B5I1     | tr E9B5I1 E9B5I1_LEIMU Putative dynein heavy chair | 34 |
| 3.507783633 | 1.6956 | E9AY82     | tr E9AY82 E9AY82_LEIMU Uncharacterized protein C   | 2  |
| 3.276576657 | 1.6954 | E9B3K7     | tr E9B3K7 E9B3K7_LEIMU Uncharacterized protein C   | 3  |
| 3.44458451  | 1.6953 | O96795;E9A | tr O96795 O96795_LEIME Dolichol-phosphate mann     | 4  |
| 3.544150651 | 1.6952 | E9AVZ4     | tr E9AVZ4 E9AVZ4_LEIMU Uncharacterized protein C   | 7  |
| 4.146202717 | 1.6949 | E9AYK8     | tr E9AYK8 E9AYK8_LEIMU Putative nitrilase OS=Leish | 3  |
| 3.857398467 | 1.6949 | Q2PQD2;E9  | tr Q2PQD2 Q2PQD2_LEIME MPK10 OS=Leishmania r       | 9  |
| 3.544288434 | 1.6948 | E9ARV1     | tr E9ARV1 E9ARV1_LEIMU Putative gamma-glutamyl     | 5  |
| 3.766078803 | 1.6946 | E9AX41     | tr E9AX41 E9AX41_LEIMU Uncharacterized protein C   | 3  |
| 3.480974607 | 1.6944 | E9B578;E9B | tr E9B578 E9B578_LEIMU Putative ribosomal proteir  | 15 |
| 3.826532987 | 1.6943 | E9AL72     | tr E9AL72 E9AL72_LEIMU Putative electron transfer  | 9  |
| 3.813011283 | 1.6942 | E9B494     | tr E9B494 E9B494_LEIMU Isocitrate dehydrogenase    | 8  |
| 3.322207996 | 1.6933 | E9ANF3     | tr E9ANF3 E9ANF3_LEIMU Uncharacterized protein C   | 5  |
| 3.87176898  | 1.6932 | E9AZT2     | tr E9AZT2 E9AZT2_LEIMU Putative electron-transfer  | 8  |
| 3.813572318 | 1.6932 | E9AL45     | tr E9AL45 E9AL45_LEIMU Putative ATP-dependent D    | 11 |
| 3.606402958 | 1.6931 | E9APY0     | tr E9APY0 E9APY0_LEIMU Serine hydroxymethyltran    | 15 |
| 3.105203987 | 1.693  | E9B6F3     | tr E9B6F3 E9B6F3_LEIMU Galactokinase-like protein  | 11 |
| 3.047881126 | 1.6929 | E9B6B0     | tr E9B6B0 E9B6B0_LEIMU Uncharacterized protein C   | 2  |
| 3.692374084 | 1.6929 | E9AMI7     | tr E9AMI7 E9AMI7_LEIMU Uncharacterized protein C   | 2  |
| 3.568744909 | 1.6927 | E9B2F8     | tr E9B2F8 E9B2F8_LEIMU Protein SEY1 homolog OS=    | 5  |
| 3.706945344 | 1.6925 | E9B4S2     | tr E9B4S2 E9B4S2_LEIMU Putative myosin IB heavy c  | 3  |

|             |        |               |                                                     |    |
|-------------|--------|---------------|-----------------------------------------------------|----|
| 4.070876999 | 1.6924 | E9AUS9        | tr E9AUS9 E9AUS9_LEIMU Putative axoneme central     | 11 |
| 3.778702853 | 1.6922 | E9AS18        | tr E9AS18 E9AS18_LEIMU DNA-directed RNA polyme      | 2  |
| 3.900030404 | 1.6922 | E9AQD9        | tr E9AQD9 E9AQD9_LEIMU Putative glutaminyl-tRNA/    | 5  |
| 3.883156187 | 1.6921 | E9AWF1        | tr E9AWF1 E9AWF1_LEIMU Putative dynein heavy ch     | 30 |
| 3.58558863  | 1.6918 | E9AQU7        | tr E9AQU7 E9AQU7_LEIMU Uncharacterized protein      | 5  |
| 3.566618052 | 1.6917 | E9ATL1        | tr E9ATL1 E9ATL1_LEIMU Uncharacterized protein O    | 8  |
| 3.628630273 | 1.6917 | E9B296        | tr E9B296 E9B296_LEIMU Putative serine/threonine-   | 3  |
| 3.658709415 | 1.6915 | E9B066        | tr E9B066 E9B066_LEIMU Uncharacterized protein C    | 5  |
| 4.499258677 | 1.6914 | E9AN41        | tr E9AN41 E9AN41_LEIMU Protein transport protein    | 3  |
| 3.341332324 | 1.6914 | E9B1W4;E9B1W4 | tr E9B1W4 E9B1W4_LEIMU Thiolase protein-like pro    | 14 |
| 3.771494936 | 1.6913 | E9ASJ4        | tr E9ASJ4 E9ASJ4_LEIMU Uncharacterized protein OS   | 2  |
| 4.078829184 | 1.6913 | E9AYA3;Q25    | tr E9AYA3 E9AYA3_LEIMU Heat shock protein 70-rele   | 14 |
| 3.69606368  | 1.6908 | E9AJD4        | tr E9AJD4 E9AJD4_LEIMU Putative fatty acyl CoA syn  | 9  |
| 3.45598993  | 1.6907 | E9AUT2        | tr E9AUT2 E9AUT2_LEIMU Uncharacterized protein (    | 2  |
| 3.666010561 | 1.6903 | E9ASE2        | tr E9ASE2 E9ASE2_LEIMU eIF3-interacting protein-lik | 11 |
| 3.878726815 | 1.6903 | E9B1G8        | tr E9B1G8 E9B1G8_LEIMU Uncharacterized protein (    | 2  |
| 3.918934585 | 1.6903 | E9APV2        | tr E9APV2 E9APV2_LEIMU Putative dynein heavy cha    | 10 |
| 4.641377079 | 1.6899 | E9B2G0        | tr E9B2G0 E9B2G0_LEIMU Proteasome regulatory nc     | 9  |
| 3.965486276 | 1.6897 | E9AN04        | tr E9AN04 E9AN04_LEIMU Uncharacterized protein (    | 11 |
| 3.365313112 | 1.6896 | E9ALD8;E9B1W4 | tr E9ALD8 E9ALD8_LEIMU 40S ribosomal protein S19    | 2  |
| 4.030854846 | 1.6894 | E9AV93        | tr E9AV93 E9AV93_LEIMU T-complex protein 1 subu     | 24 |
| 3.441851091 | 1.6893 | E9ARW1        | tr E9ARW1 E9ARW1_LEIMU Putative fibrillarlin OS=Le  | 6  |
| 5.156014434 | 1.6892 | E9AN95        | tr E9AN95 E9AN95_LEIMU Putative nuclear transpor    | 2  |
| 4.361848495 | 1.6891 | E9ATW0        | tr E9ATW0 E9ATW0_LEIMU Putative adaptin OS=Leis     | 2  |
| 3.852794007 | 1.6891 | E9APB6        | tr E9APB6 E9APB6_LEIMU Uncharacterized protein C    | 2  |
| 3.506392826 | 1.6889 | E9AQT4        | tr E9AQT4 E9AQT4_LEIMU Uncharacterized protein (    | 7  |
| 3.90282965  | 1.6887 | E9AXW8        | tr E9AXW8 E9AXW8_LEIMU Putative serine/threonin     | 3  |
| 4.021037763 | 1.6886 | E9ARK4        | tr E9ARK4 E9ARK4_LEIMU Uncharacterized protein C    | 10 |
| 3.659861748 | 1.6886 | E9B384        | tr E9B384 E9B384_LEIMU Uncharacterized protein C    | 21 |
| 3.568392016 | 1.6885 | E9AL78        | tr E9AL78 E9AL78_LEIMU Calcium-transporting ATPa    | 2  |
| 3.780087658 | 1.6884 | E9AQL0        | tr E9AQL0 E9AQL0_LEIMU Uncharacterized protein (    | 5  |
| 3.85091441  | 1.6883 | E9AQ77        | tr E9AQ77 E9AQ77_LEIMU Uncharacterized protein (    | 4  |
| 3.495670268 | 1.6881 | Q0PKV8;E9E    | tr Q0PKV8 Q0PKV8_LEIME Putative mitogen-activate    | 2  |
| 3.915674659 | 1.6874 | E9B3U9        | tr E9B3U9 E9B3U9_LEIMU Putative pumilio protein (   | 8  |
| 3.7134912   | 1.6872 | E9B0J0        | tr E9B0J0 E9B0J0_LEIMU Uncharacterized protein OS   | 2  |
| 3.587674576 | 1.6871 | E9ASS0        | tr E9ASS0 E9ASS0_LEIMU Uncharacterized protein O    | 4  |
| 3.688469001 | 1.6863 | E9AYS6        | tr E9AYS6 E9AYS6_LEIMU Kinetoplast-associated pro   | 2  |
| 3.898691582 | 1.6859 | E9ATS7        | tr E9ATS7 E9ATS7_LEIMU Methylthioribose-1-phosp     | 5  |
| 3.877156629 | 1.6859 | E9AV27        | tr E9AV27 E9AV27_LEIMU Uncharacterized protein (    | 4  |
| 3.802267119 | 1.6856 | E9ANZ0        | tr E9ANZ0 E9ANZ0_LEIMU Putative alanine aminotra    | 6  |
| 4.4794613   | 1.6852 | E9API2        | tr E9API2 E9API2_LEIMU Ubiquitin-conjugating enzy   | 3  |
| 3.985256815 | 1.6849 | E9AXH6        | tr E9AXH6 E9AXH6_LEIMU Putative dynein heavy cha    | 67 |
| 3.312544883 | 1.6843 | E9API7        | tr E9API7 E9API7_LEIMU Mitochondrial DNA polyme     | 4  |
| 3.863238311 | 1.6837 | E9ASC2        | tr E9ASC2 E9ASC2_LEIMU Putative PUF1 OS=Leishma     | 5  |
| 3.661205281 | 1.6837 | E9AQN2        | tr E9AQN2 E9AQN2_LEIMU Putative ubiquitin hydrol    | 2  |
| 3.39455124  | 1.6836 | E9B5S1        | tr E9B5S1 E9B5S1_LEIMU Putative short chain dehy    | 7  |
| 3.501121888 | 1.6836 | E9B6Y4        | tr E9B6Y4 E9B6Y4_LEIMU Histone-lysine N-methyltra   | 7  |
| 3.817456674 | 1.6833 | E9AP13        | tr E9AP13 E9AP13_LEIMU NADH:flavin oxidoreducta     | 9  |
| 3.612562318 | 1.6832 | E9AW77        | tr E9AW77 E9AW77_LEIMU Uncharacterized protein      | 3  |
| 3.051961113 | 1.6831 | E9ANA0        | tr E9ANA0 E9ANA0_LEIMU Uncharacterized protein      | 3  |

|             |        |            |                        |                                |    |
|-------------|--------|------------|------------------------|--------------------------------|----|
| 3.782609164 | 1.6831 | E9B0H3     | tr E9B0H3 E9B0H3_LEIMU | Putative bystin OS=Leishn      | 4  |
| 3.143735701 | 1.6831 | E9AXU7;E9A | tr E9AXU7 E9AXU7_LEIMU | Succinate--CoA ligase [AD      | 14 |
| 3.74054107  | 1.6828 | E9AZ16     | tr E9AZ16 E9AZ16_LEIMU | Putative intraflagellar tran   | 5  |
| 4.017019584 | 1.6828 | E9AQ29     | tr E9AQ29 E9AQ29_LEIMU | Ribonucleoprotein p18, n       | 8  |
| 3.801754869 | 1.6823 | E9B453     | tr E9B453 E9B453_LEIMU | Uncharacterized protein C      | 3  |
| 3.791592732 | 1.6822 | E9ANV5     | tr E9ANV5 E9ANV5_LEIMU | Putative ornithine decarbk     | 8  |
| 3.758843567 | 1.6817 | Q8MTW1;E9  | tr Q8MTW1 Q8MTW1_LEIAM | Meta 2 protein OS=Lei          | 9  |
| 3.885604632 | 1.6813 | E9B2J6     | tr E9B2J6 E9B2J6_LEIMU | Uncharacterized protein OS     | 7  |
| 3.750153224 | 1.6811 | E9AWS5     | tr E9AWS5 E9AWS5_LEIMU | Putative dynein arm ligh       | 4  |
| 4.414981973 | 1.6805 | E9B0U8     | tr E9B0U8 E9B0U8_LEIMU | Uncharacterized protein C      | 2  |
| 3.184389709 | 1.6803 | E9B547     | tr E9B547 E9B547_LEIMU | Uncharacterized protein C      | 9  |
| 3.983337435 | 1.6797 | E9AZ28     | tr E9AZ28 E9AZ28_LEIMU | Uncharacterized protein C      | 7  |
| 3.642335997 | 1.6795 | E9AQ80     | tr E9AQ80 E9AQ80_LEIMU | Uncharacterized protein C      | 4  |
| 3.90557807  | 1.6792 | E9B3Z6     | tr E9B3Z6 E9B3Z6_LEIMU | Uncharacterized protein O      | 6  |
| 4.157578905 | 1.6791 | E9AK27     | tr E9AK27 E9AK27_LEIMU | Adenylosuccinate lyase OS      | 2  |
| 3.788342717 | 1.6791 | E9AV48     | tr E9AV48 E9AV48_LEIMU | Uncharacterized protein C      | 28 |
| 3.915275626 | 1.6789 | E9B5M6     | tr E9B5M6 E9B5M6_LEIMU | Coatomer subunit alpha         | 19 |
| 3.103933833 | 1.6785 | E9B104     | tr E9B104 E9B104_LEIMU | Uncharacterized protein C      | 2  |
| 3.174738395 | 1.6784 | E9AM90     | tr E9AM90 E9AM90_LEIMU | Uncharacterized protein        | 2  |
| 4.582962319 | 1.6782 | E9ALH4     | tr E9ALH4 E9ALH4_LEIMU | Vacuolar protein sorting-a     | 6  |
| 4.304071516 | 1.6779 | E9AT66     | tr E9AT66 E9AT66_LEIMU | Uncharacterized protein C      | 5  |
| 3.797334978 | 1.6779 | E9B5S5     | tr E9B5S5 E9B5S5_LEIMU | Putative ATP-dependent D       | 16 |
| 3.610598678 | 1.6772 | E9ARC2     | tr E9ARC2 E9ARC2_LEIMU | Uncharacterized protein C      | 19 |
| 4.000965467 | 1.6769 | E9B199     | tr E9B199 E9B199_LEIMU | Putative glutamyl-tRNA sy      | 11 |
| 4.441137783 | 1.6767 | Q95PT4;E9A | tr Q95PT4 Q95PT4_LEIME | Myo-inositol-1-phosphate       | 4  |
| 3.852243928 | 1.6764 | E9AN29     | tr E9AN29 E9AN29_LEIMU | Putative nucleolar proteir     | 17 |
| 3.178623441 | 1.6761 | Q06309;E9A | sp Q06309 CRK1_LEIME   | Cell division protein kinase 2 | 2  |
| 3.767455733 | 1.6757 | E9B5R2     | tr E9B5R2 E9B5R2_LEIMU | 60S ribosomal protein L30      | 4  |
| 4.061595341 | 1.6756 | E9AVE1     | tr E9AVE1 E9AVE1_LEIMU | Putative RNA helicase OS=      | 10 |
| 3.666061141 | 1.6754 | E9B709     | tr E9B709 E9B709_LEIMU | Uncharacterized protein C      | 2  |
| 3.779505204 | 1.6752 | E9B2R2     | tr E9B2R2 E9B2R2_LEIMU | Uncharacterized protein C      | 8  |
| 4.210042366 | 1.675  | E9ARB5     | tr E9ARB5 E9ARB5_LEIMU | Putative zinc-finger protei    | 8  |
| 4.024709184 | 1.675  | E9B0M9     | tr E9B0M9 E9B0M9_LEIMU | Uncharacterized protein        | 2  |
| 3.556892952 | 1.6749 | E9B490     | tr E9B490 E9B490_LEIMU | Uncharacterized protein C      | 6  |
| 4.06779514  | 1.6748 | E9APE3     | tr E9APE3 E9APE3_LEIMU | Adenylosuccinate synthet       | 15 |
| 4.152420091 | 1.6742 | E9B343     | tr E9B343 E9B343_LEIMU | Putative cystathionine bet     | 5  |
| 3.689666369 | 1.674  | E9AKI9     | tr E9AKI9 E9AKI9_LEIMU | S-methyl-5-thioadenosine p     | 2  |
| 4.566565667 | 1.6739 | E9AYL7     | tr E9AYL7 E9AYL7_LEIMU | Putative sec1 family transp    | 3  |
| 3.712676746 | 1.6738 | E9B0G2     | tr E9B0G2 E9B0G2_LEIMU | Putative phosphatase 2C        | 4  |
| 4.513638262 | 1.6735 | E9AZK1     | tr E9AZK1 E9AZK1_LEIMU | Katanin p60 ATPase-conta       | 2  |
| 4.257974286 | 1.6733 | E9AUY8     | tr E9AUY8 E9AUY8_LEIMU | Uncharacterized protein C      | 2  |
| 3.947303098 | 1.6732 | E9B3L2;P27 | tr E9B3L2 E9B3L2_LEIMU | Heat shock protein 83-1 OS     | 46 |
| 3.421655257 | 1.6728 | E9AJP3     | tr E9AJP3 E9AJP3_LEIMU | Glycerol-3-phosphate acyl      | 7  |
| 3.529355637 | 1.6727 | E9B4E9     | tr E9B4E9 E9B4E9_LEIMU | Uncharacterized protein O      | 8  |
| 3.679426764 | 1.6726 | E9AS63     | tr E9AS63 E9AS63_LEIMU | Proteasome regulatory no       | 13 |
| 3.504666673 | 1.6722 | E9ANA1     | tr E9ANA1 E9ANA1_LEIMU | Putative small GTP-bindir      | 8  |
| 4.121982328 | 1.672  | E9B6I9     | tr E9B6I9 E9B6I9_LEIMU | Putative ATP-dependent RN      | 25 |
| 4.036190518 | 1.6719 | E9AXF3     | tr E9AXF3 E9AXF3_LEIMU | Uncharacterized protein C      | 8  |
| 3.620151198 | 1.6718 | E9AK37     | tr E9AK37 E9AK37_LEIMU | Uncharacterized protein C      | 10 |
| 4.007134231 | 1.6717 | E9AYQ2;A0  | tr E9AYQ2 E9AYQ2_LEIMU | Putative glutamate 5-kin       | 2  |

|             |        |            |                        |                              |    |
|-------------|--------|------------|------------------------|------------------------------|----|
| 2.871042804 | 1.6716 | E9AVQ5     | tr E9AVQ5 E9AVQ5_LEIMU | Uncharacterized protein      | 2  |
| 3.612405276 | 1.6711 | E9AL20     | tr E9AL20 E9AL20_LEIMU | Pitrilysin-like metalloprote | 8  |
| 3.794559063 | 1.6701 | E9B4B4     | tr E9B4B4 E9B4B4_LEIMU | Putative translation initiat | 12 |
| 4.032079561 | 1.6691 | E9ALU2     | tr E9ALU2 E9ALU2_LEIMU | Putative carnitine/choline   | 8  |
| 4.234052542 | 1.6691 | E9B2P6     | tr E9B2P6 E9B2P6_LEIMU | Uncharacterized protein C    | 7  |
| 3.142252884 | 1.6689 | E9ALL9;E9A | tr E9ALL9 E9ALL9_LEIMU | Uncharacterized protein O'   | 2  |
| 3.835549034 | 1.6689 | E9AP62;E8N | tr E9AP62 E9AP62_LEIMU | Tubulin alpha chain OS=Le    | 26 |
| 3.942750438 | 1.6689 | E9AVC8     | tr E9AVC8 E9AVC8_LEIMU | Uncharacterized protein C    | 2  |
| 4.042752779 | 1.6687 | E9AQV6;H6  | tr E9AQV6 E9AQV6_LEIMU | Paraflagellar rod protein    | 2  |
| 2.410630757 | 1.6683 | E9B452     | tr E9B452 E9B452_LEIMU | Kinesin-like protein OS=Le   | 3  |
| 3.75541826  | 1.668  | E9AY42     | tr E9AY42 E9AY42_LEIMU | Uncharacterized protein C    | 3  |
| 3.37548014  | 1.6673 | E9B2Y6     | tr E9B2Y6 E9B2Y6_LEIMU | ABC transporter-like prote   | 4  |
| 4.221954317 | 1.6672 | E9ARY4     | tr E9ARY4 E9ARY4_LEIMU | Intraflagellar transport pro | 10 |
| 3.963147644 | 1.6672 | E9ATD8     | tr E9ATD8 E9ATD8_LEIMU | Putative cysteine synthasi   | 6  |
| 3.746219679 | 1.667  | E9B2E2     | tr E9B2E2 E9B2E2_LEIMU | Uncharacterized protein O    | 6  |
| 3.813922823 | 1.6669 | E9AUW3     | tr E9AUW3 E9AUW3_LEIMU | Uncharacterized protein      | 2  |
| 3.412991401 | 1.6668 | E9AXH9     | tr E9AXH9 E9AXH9_LEIMU | Uncharacterized protein C    | 2  |
| 4.053772583 | 1.6668 | E9AKB4     | tr E9AKB4 E9AKB4_LEIMU | Serine/threonine-protein     | 14 |
| 3.860365201 | 1.6661 | E9AS95     | tr E9AS95 E9AS95_LEIMU | Uncharacterized protein O    | 2  |
| 3.876601592 | 1.6658 | E9APF9     | tr E9APF9 E9APF9_LEIMU | Uncharacterized protein C    | 4  |
| 4.105579229 | 1.6658 | E9AQF8     | tr E9AQF8 E9AQF8_LEIMU | Uncharacterized protein C    | 2  |
| 3.57430139  | 1.6658 | E9AVT0     | tr E9AVT0 E9AVT0_LEIMU | Uncharacterized protein C    | 3  |
| 4.166555055 | 1.6656 | E9ATG6     | tr E9ATG6 E9ATG6_LEIMU | Putative glycyl tRNA synt    | 13 |
| 3.90910197  | 1.6655 | E9B4C1     | tr E9B4C1 E9B4C1_LEIMU | Transcription elongation fi  | 7  |
| 3.230744006 | 1.6653 | E9B162     | tr E9B162 E9B162_LEIMU | Uncharacterized protein C    | 2  |
| 3.876129945 | 1.6645 | E9B5L4     | tr E9B5L4 E9B5L4_LEIMU | Serine/threonine-protein p   | 3  |
| 4.34584526  | 1.6642 | E9AJK0     | tr E9AJK0 E9AJK0_LEIMU | Proteasome regulatory nor    | 18 |
| 3.747167085 | 1.6639 | E9AJW0     | tr E9AJW0 E9AJW0_LEIMU | Uncharacterized protein      | 3  |
| 3.73650506  | 1.6638 | E9AWI0     | tr E9AWI0 E9AWI0_LEIMU | Pyridoxal phosphate hom      | 4  |
| 2.902569991 | 1.6629 | E9AX71     | tr E9AX71 E9AX71_LEIMU | Putative fatty-acid desatu   | 2  |
| 3.564698677 | 1.6629 | E9ATU2     | tr E9ATU2 E9ATU2_LEIMU | Uncharacterized protein C    | 4  |
| 3.486452752 | 1.6626 | E9AU68     | tr E9AU68 E9AU68_LEIMU | Putative ubiquitin-proteir   | 3  |
| 3.547288563 | 1.6626 | E9AMD0     | tr E9AMD0 E9AMD0_LEIMU | Putative ribose-phosphat     | 5  |
| 4.341378233 | 1.6623 | E9B638     | tr E9B638 E9B638_LEIMU | Uncharacterized protein C    | 3  |
| 3.218792566 | 1.6622 | E9AJK4     | tr E9AJK4 E9AJK4_LEIMU | Putative RNA-editing comp    | 3  |
| 3.292506081 | 1.662  | E9B4N6     | tr E9B4N6 E9B4N6_LEIMU | ABC transporter-like prot    | 4  |
| 3.741340805 | 1.6617 | E9ALG1     | tr E9ALG1 E9ALG1_LEIMU | Uncharacterized protein C    | 19 |
| 3.894735195 | 1.6616 | E9AY72     | tr E9AY72 E9AY72_LEIMU | Uncharacterized protein C    | 6  |
| 3.170132275 | 1.6614 | E9B474     | tr E9B474 E9B474_LEIMU | Uncharacterized protein C    | 2  |
| 3.733800402 | 1.6614 | E9B6B5     | tr E9B6B5 E9B6B5_LEIMU | Putative aminopeptidase I    | 4  |
| 3.62830612  | 1.6613 | E9API0     | tr E9API0 E9API0_LEIMU | Putative ras-family membe    | 3  |
| 4.236075597 | 1.6613 | E9AZ29     | tr E9AZ29 E9AZ29_LEIMU | Putative T-complex protei    | 17 |
| 3.86881653  | 1.6612 | E8NHQ7;E9  | tr E8NHQ7 E8NHQ7_LEIMU | Putative ATPase alpha su     | 20 |
| 3.91997376  | 1.6612 | E9ANQ6     | tr E9ANQ6 E9ANQ6_LEIMU | Putative eukaryotic relea    | 15 |
| 3.933964266 | 1.6611 | E9ANT6     | tr E9ANT6 E9ANT6_LEIMU | Uncharacterized protein C    | 3  |
| 3.851738284 | 1.6608 | E9B2V1     | tr E9B2V1 E9B2V1_LEIMU | Uncharacterized protein C    | 11 |
| 3.646753874 | 1.6606 | E9AV82     | tr E9AV82 E9AV82_LEIMU | Uncharacterized protein C    | 20 |
| 4.029967728 | 1.6605 | E9AKE5     | tr E9AKE5 E9AKE5_LEIMU | Uncharacterized protein C    | 3  |
| 3.617466429 | 1.6602 | E9AX96     | tr E9AX96 E9AX96_LEIMU | Uncharacterized protein C    | 9  |
| 3.804798755 | 1.6601 | E9B1P3;E8N | tr E9B1P3 E9B1P3_LEIMU | Sodium stibogluconate res    | 8  |

|             |        |            |                                                     |    |
|-------------|--------|------------|-----------------------------------------------------|----|
| 3.823070898 | 1.6599 | E9B2P8     | tr E9B2P8 E9B2P8_LEIMU Putative ADP-ribosylation    | 2  |
| 3.512026318 | 1.6596 | E8NHF3;E8N | tr E8NHF3 E8NHF3_LEIMU Uncharacterized protein I    | 2  |
| 3.75081013  | 1.6596 | E9ASQ3     | tr E9ASQ3 E9ASQ3_LEIMU Putative N-acetyltransferase | 13 |
| 4.124398351 | 1.6594 | E9AAY8     | tr E9AAY8 E9AAY8_LEIMU Uncharacterized protein C    | 2  |
| 3.958318173 | 1.6593 | E9AXL3     | tr E9AXL3 E9AXL3_LEIMU Uncharacterized protein O    | 5  |
| 4.05455309  | 1.659  | E9B1B8     | tr E9B1B8 E9B1B8_LEIMU Uncharacterized protein C    | 11 |
| 3.88387769  | 1.6589 | E9AMI1     | tr E9AMI1 E9AMI1_LEIMU Stress-induced protein sti   | 6  |
| 3.469599909 | 1.6584 | E9AP74     | tr E9AP74 E9AP74_LEIMU Putative RNA helicase OS=    | 10 |
| 4.05611104  | 1.6581 | E9ASL5     | tr E9ASL5 E9ASL5_LEIMU Putative dynein heavy chain  | 21 |
| 3.647645092 | 1.658  | E9AS32     | tr E9AS32 E9AS32_LEIMU Putative ABC transporter C   | 7  |
| 3.587477318 | 1.6579 | E9B2M0     | tr E9B2M0 E9B2M0_LEIMU Putative ubiquitin-conjugat  | 4  |
| 3.948068334 | 1.6575 | E9ALA2     | tr E9ALA2 E9ALA2_LEIMU Putative ubiquitin-conjugat  | 2  |
| 3.045810986 | 1.6574 | E9AZJ5     | tr E9AZJ5 E9AZJ5_LEIMU Uncharacterized protein OS   | 2  |
| 3.851312614 | 1.6573 | E9AP27     | tr E9AP27 E9AP27_LEIMU Arginine N-methyltransfer    | 8  |
| 3.362424706 | 1.6568 | E9AXD5     | tr E9AXD5 E9AXD5_LEIMU Uncharacterized protein C    | 2  |
| 3.415796141 | 1.6568 | E9AV28     | tr E9AV28 E9AV28_LEIMU Putative RNA helicase OS=    | 9  |
| 3.716882897 | 1.6567 | E9ATM7     | tr E9ATM7 E9ATM7_LEIMU Asparaginase-like protein    | 4  |
| 2.910920024 | 1.6565 | E9AZ52     | tr E9AZ52 E9AZ52_LEIMU Uncharacterized protein C    | 2  |
| 3.736606452 | 1.6564 | E9AYT3     | tr E9AYT3 E9AYT3_LEIMU Uncharacterized protein C    | 2  |
| 3.658353649 | 1.6563 | E9AKM0     | tr E9AKM0 E9AKM0_LEIMU Uncharacterized protein      | 5  |
| 4.114032723 | 1.6556 | E9AQX3     | tr E9AQX3 E9AQX3_LEIMU Uncharacterized protein      | 7  |
| 3.377851101 | 1.6555 | E9ALD4     | tr E9ALD4 E9ALD4_LEIMU Uncharacterized protein C    | 8  |
| 4.04442878  | 1.6553 | E9AVC0     | tr E9AVC0 E9AVC0_LEIMU Uncharacterized protein C    | 2  |
| 4.175069924 | 1.6551 | E9AY66;Q86 | tr E9AY66 E9AY66_LEIMU Putative 40S ribosomal pro   | 6  |
| 4.119658217 | 1.6549 | E9AP67     | tr E9AP67 E9AP67_LEIMU Putative flagellar radial sp | 11 |
| 3.766484244 | 1.6548 | E9AMC0     | tr E9AMC0 E9AMC0_LEIMU Uncharacterized protein      | 7  |
| 3.443122027 | 1.6546 | E9AUK8     | tr E9AUK8 E9AUK8_LEIMU rRNA biogenesis protein-l    | 7  |
| 3.730331993 | 1.6545 | E9AWZ5     | tr E9AWZ5 E9AWZ5_LEIMU Uncharacterized protein      | 3  |
| 3.460315575 | 1.654  | E9AQV1     | tr E9AQV1 E9AQV1_LEIMU Uncharacterized protein      | 2  |
| 3.313283787 | 1.6538 | E9APN6     | tr E9APN6 E9APN6_LEIMU Uncharacterized protein C    | 3  |
| 3.772320911 | 1.6538 | E9B1R9     | tr E9B1R9 E9B1R9_LEIMU Uncharacterized protein C    | 14 |
| 4.234739423 | 1.6537 | E9AN11     | tr E9AN11 E9AN11_LEIMU Uncharacterized protein C    | 2  |
| 3.693766415 | 1.6532 | E9AJN3     | tr E9AJN3 E9AJN3_LEIMU Putative ATP-dependent C     | 18 |
| 3.66197545  | 1.6531 | Q4KXA6;E9E | tr Q4KXA6 Q4KXA6_LEIME Cytoplasmic dynein heavy     | 27 |
| 3.033602102 | 1.6529 | E9AN17     | tr E9AN17 E9AN17_LEIMU Probable cytosolic iron-su   | 2  |
| 3.691554605 | 1.6528 | E9B357     | tr E9B357 E9B357_LEIMU Uncharacterized protein C    | 6  |
| 3.894782896 | 1.6522 | E9AV50     | tr E9AV50 E9AV50_LEIMU Uncharacterized protein C    | 5  |
| 5.101751976 | 1.6519 | E9B314     | tr E9B314 E9B314_LEIMU Uncharacterized protein C    | 4  |
| 3.515240578 | 1.6519 | E9APR7     | tr E9APR7 E9APR7_LEIMU Elongation of fatty acids p  | 4  |
| 3.609748299 | 1.6517 | E9B1P8     | tr E9B1P8 E9B1P8_LEIMU Uncharacterized protein C    | 3  |
| 4.067295153 | 1.6516 | E9AQC4     | tr E9AQC4 E9AQC4_LEIMU Uncharacterized protein      | 4  |
| 3.927200134 | 1.6514 | E9AZG7     | tr E9AZG7 E9AZG7_LEIMU Uncharacterized protein C    | 3  |
| 3.657072544 | 1.6512 | E9AVJ6     | tr E9AVJ6 E9AVJ6_LEIMU Putative GMP synthase (Pu    | 13 |
| 3.717508871 | 1.6512 | E9APD4;A0A | tr E9APD4 E9APD4_LEIMU Putative leucyl-tRNA synt    | 8  |
| 3.952155761 | 1.6511 | E9ANP0     | tr E9ANP0 E9ANP0_LEIMU 40S ribosomal protein S5     | 4  |
| 3.673235231 | 1.651  | E9AUN3     | tr E9AUN3 E9AUN3_LEIMU Uncharacterized protein      | 4  |
| 3.856085692 | 1.6504 | E9AZ37     | tr E9AZ37 E9AZ37_LEIMU Putative arginyl-tRNA synt   | 20 |
| 3.567380191 | 1.6503 | E9AUY1     | tr E9AUY1 E9AUY1_LEIMU Uncharacterized protein C    | 3  |
| 3.996106444 | 1.6502 | E9APW3;Q3  | tr E9APW3 E9APW3_LEIMU Enolase OS=Leishmania        | 17 |
| 3.468529883 | 1.6501 | E9AKI4     | tr E9AKI4 E9AKI4_LEIMU Uncharacterized protein OS   | 2  |

|             |        |            |                                                    |    |
|-------------|--------|------------|----------------------------------------------------|----|
| 3.430437475 | 1.6501 | E9AYF3     | tr E9AYF3 E9AYF3_LEIMU Uncharacterized protein O   | 2  |
| 3.901104357 | 1.6495 | E9AZ66     | tr E9AZ66 E9AZ66_LEIMU Uncharacterized protein C   | 4  |
| 3.76105501  | 1.6494 | E9B492     | tr E9B492 E9B492_LEIMU Uncharacterized protein C   | 11 |
| 3.732301253 | 1.649  | E9B049     | tr E9B049 E9B049_LEIMU DNA topoisomerase 2 OS=     | 7  |
| 3.53576551  | 1.6485 | E9AP79     | tr E9AP79 E9AP79_LEIMU Uncharacterized protein C   | 3  |
| 3.689397786 | 1.6481 | E9B5V1     | tr E9B5V1 E9B5V1_LEIMU Uncharacterized protein C   | 3  |
| 3.911863494 | 1.6479 | E9AQ59     | tr E9AQ59 E9AQ59_LEIMU Uncharacterized protein (   | 2  |
| 3.675835439 | 1.6477 | E9AYX8     | tr E9AYX8 E9AYX8_LEIMU Putative small GTP-binding  | 9  |
| 3.448762749 | 1.6476 | E9B028     | tr E9B028 E9B028_LEIMU Putative mitochondrial DE   | 8  |
| 3.40181491  | 1.6471 | E9AZU2     | tr E9AZU2 E9AZU2_LEIMU Uncharacterized protein (   | 2  |
| 3.723332882 | 1.6471 | E9AXX5     | tr E9AXX5 E9AXX5_LEIMU Uncharacterized protein C   | 15 |
| 4.029563748 | 1.647  | E9B4S6     | tr E9B4S6 E9B4S6_LEIMU Putative uracil phosphorib  | 4  |
| 3.512322333 | 1.6469 | E9AJJ2     | tr E9AJJ2 E9AJJ2_LEIMU Uncharacterized protein OS= | 3  |
| 3.455229404 | 1.6466 | E9AQ19     | tr E9AQ19 E9AQ19_LEIMU Putative 60S ribosomal p    | 8  |
| 3.688804042 | 1.6464 | E9B204     | tr E9B204 E9B204_LEIMU Uncharacterized protein C   | 5  |
| 3.887351138 | 1.6461 | E9AU29     | tr E9AU29 E9AU29_LEIMU Uncharacterized protein (   | 5  |
| 3.554979502 | 1.6461 | E9B3L9     | tr E9B3L9 E9B3L9_LEIMU Putative DNA mismatch re    | 4  |
| 3.730598809 | 1.6455 | E9AM28     | tr E9AM28 E9AM28_LEIMU Cofilin-like protein OS=L   | 8  |
| 3.977367491 | 1.6452 | E9AVD1     | tr E9AVD1 E9AVD1_LEIMU Uncharacterized protein (   | 5  |
| 3.622073405 | 1.6449 | E9AX84     | tr E9AX84 E9AX84_LEIMU Putative poly(A)-binding p  | 13 |
| 3.392252401 | 1.6448 | E9ATM9     | tr E9ATM9 E9ATM9_LEIMU Putative mitochondrial i    | 9  |
| 3.769274654 | 1.6446 | E9AK23     | tr E9AK23 E9AK23_LEIMU Uncharacterized protein C   | 5  |
| 4.124348648 | 1.6446 | E9ASQ7     | tr E9ASQ7 E9ASQ7_LEIMU Uncharacterized protein (   | 4  |
| 4.192121463 | 1.6444 | E9B605     | tr E9B605 E9B605_LEIMU Uncharacterized protein C   | 5  |
| 3.800988443 | 1.6442 | E9ALU9     | tr E9ALU9 E9ALU9_LEIMU Uncharacterized protein C   | 18 |
| 3.401399319 | 1.6442 | E9AZV0     | tr E9AZV0 E9AZV0_LEIMU Putative ATP-dependent F    | 4  |
| 3.411047352 | 1.6438 | E9B5I7     | tr E9B5I7 E9B5I7_LEIMU Phosphatidylinositol 3-kin  | 4  |
| 3.815144208 | 1.6436 | E9B0B0     | tr E9B0B0 E9B0B0_LEIMU Putative dynein heavy cha   | 19 |
| 3.974252501 | 1.6436 | E9AU23     | tr E9AU23 E9AU23_LEIMU Putative small GTPase OS    | 2  |
| 3.487959293 | 1.6431 | E9AJA7     | tr E9AJA7 E9AJA7_LEIMU Uncharacterized protein O   | 2  |
| 3.764114607 | 1.6428 | E9AQ94     | tr E9AQ94 E9AQ94_LEIMU Putative 40S ribosomal p    | 12 |
| 3.92564188  | 1.6426 | E9B4E6     | tr E9B4E6 E9B4E6_LEIMU Tyrosyl-DNA phosphodi       | 2  |
| 5.014389813 | 1.6423 | E9ARJ3     | tr E9ARJ3 E9ARJ3_LEIMU V-type proton ATPase sub    | 3  |
| 4.21651242  | 1.6422 | E9AX72     | tr E9AX72 E9AX72_LEIMU Putative notchless homol    | 2  |
| 3.51679835  | 1.6422 | E9ANQ5     | tr E9ANQ5 E9ANQ5_LEIMU Uncharacterized protein     | 8  |
| 3.6166582   | 1.6416 | E9AYV1     | tr E9AYV1 E9AYV1_LEIMU Putative calpain-like cyste | 9  |
| 3.844959393 | 1.6411 | E9AKE1;Q0C | tr E9AKE1 E9AKE1_LEIMU Trypanothione reductase (   | 2  |
| 3.750090913 | 1.6406 | E9B1B4     | tr E9B1B4 E9B1B4_LEIMU Putative CAS/CSE/importin   | 10 |
| 3.959862665 | 1.6401 | E9B1A1     | tr E9B1A1 E9B1A1_LEIMU Uncharacterized protein C   | 2  |
| 4.152899504 | 1.6396 | E9API9     | tr E9API9 E9API9_LEIMU Putative dynein heavy chain | 69 |
| 3.582692465 | 1.6388 | E9AVH1     | tr E9AVH1 E9AVH1_LEIMU Uncharacterized protein (   | 2  |
| 3.44188704  | 1.6387 | E9AU20     | tr E9AU20 E9AU20_LEIMU Uncharacterized protein (   | 6  |
| 4.237643604 | 1.6384 | E9AT90     | tr E9AT90 E9AT90_LEIMU Uncharacterized protein C   | 2  |
| 3.585632612 | 1.6382 | E9AYA9     | tr E9AYA9 E9AYA9_LEIMU Uncharacterized protein C   | 2  |
| 3.719882067 | 1.6381 | E9B4W0     | tr E9B4W0 E9B4W0_LEIMU Uncharacterized protein     | 9  |
| 3.544077104 | 1.6373 | E9AYK5     | tr E9AYK5 E9AYK5_LEIMU Uncharacterized protein C   | 2  |
| 3.708210311 | 1.6364 | E9B423     | tr E9B423 E9B423_LEIMU Nucleolar GTP-binding pro   | 12 |
| 3.950097569 | 1.6358 | E9AWK3     | tr E9AWK3 E9AWK3_LEIMU Ankyrin/TPR repeat prot     | 6  |
| 3.277801539 | 1.6356 | E9AKJ5     | tr E9AKJ5 E9AKJ5_LEIMU Uncharacterized protein O'  | 8  |
| 3.663161614 | 1.6355 | E9AN24     | tr E9AN24 E9AN24_LEIMU Putative leucine-rich repe  | 4  |

|             |        |            |                        |                              |    |
|-------------|--------|------------|------------------------|------------------------------|----|
| 3.96692308  | 1.6353 | Q9BLW4;E9  | tr Q9BLW4 Q9BLW4_LEIME | GDP-mannose pyrophos         | 9  |
| 4.009622025 | 1.6348 | E9ALG7     | tr E9ALG7 E9ALG7_LEIMU | Putative serine/threonine    | 7  |
| 3.369558048 | 1.6347 | E9AKN2     | tr E9AKN2 E9AKN2_LEIMU | Uncharacterized protein C    | 2  |
| 4.284262636 | 1.6346 | E9B6K5     | tr E9B6K5 E9B6K5_LEIMU | Uncharacterized protein C    | 3  |
| 3.962619328 | 1.6344 | E9AV58     | tr E9AV58 E9AV58_LEIMU | Hypoxanthine phosphorib      | 6  |
| 3.485239722 | 1.6339 | E9B730     | tr E9B730 E9B730_LEIMU | Polyadenylate-binding pro    | 11 |
| 3.248746453 | 1.6339 | E9B017     | tr E9B017 E9B017_LEIMU | Uncharacterized protein C    | 3  |
| 3.764987038 | 1.6339 | E9AJM8     | tr E9AJM8 E9AJM8_LEIMU | Uncharacterized protein C    | 6  |
| 3.770586121 | 1.6338 | E9ATK1;A1Y | tr E9ATK1 E9ATK1_LEIMU | Putative oxidoreductase C    | 8  |
| 4.211354336 | 1.6337 | E9AS55     | tr E9AS55 E9AS55_LEIMU | Putative phenylalanyl-tRN    | 5  |
| 4.410215048 | 1.6337 | E9B2N4     | tr E9B2N4 E9B2N4_LEIMU | Uncharacterized protein C    | 7  |
| 4.098404212 | 1.6323 | E9B4I7     | tr E9B4I7 E9B4I7_LEIMU | Uncharacterized protein OS   | 4  |
| 3.430617719 | 1.6322 | E9ANS0     | tr E9ANS0 E9ANS0_LEIMU | Uncharacterized protein C    | 5  |
| 3.429048918 | 1.6316 | E9B1G4     | tr E9B1G4 E9B1G4_LEIMU | DNA-directed RNA polym       | 10 |
| 3.603009497 | 1.6316 | E9AX89     | tr E9AX89 E9AX89_LEIMU | Putative elongation factor   | 13 |
| 3.856294554 | 1.6316 | E9B601     | tr E9B601 E9B601_LEIMU | Putative short chain dehy    | 3  |
| 3.828559368 | 1.6314 | E9AZ67     | tr E9AZ67 E9AZ67_LEIMU | Uncharacterized protein C    | 14 |
| 4.422371744 | 1.631  | E9AZ89;A5J | tr E9AZ89 E9AZ89_LEIMU | Putative trypanothione sy    | 4  |
| 3.767644872 | 1.6308 | E9AXZ8;E9A | tr E9AXZ8 E9AXZ8_LEIMU | Putative 60S ribosomal pr    | 8  |
| 3.915392469 | 1.6306 | E9B587     | tr E9B587 E9B587_LEIMU | Uncharacterized protein C    | 2  |
| 3.725985005 | 1.6306 | E9B5D5     | tr E9B5D5 E9B5D5_LEIMU | Uncharacterized protein C    | 3  |
| 3.663410801 | 1.6304 | E9B0K3     | tr E9B0K3 E9B0K3_LEIMU | Uncharacterized protein C    | 12 |
| 2.95442041  | 1.63   | E9B4A0     | tr E9B4A0 E9B4A0_LEIMU | Putative enoyl-CoA hydrat    | 2  |
| 3.609810988 | 1.63   | E9AUC7     | tr E9AUC7 E9AUC7_LEIMU | Putative T-complex prote     | 14 |
| 3.638586279 | 1.6299 | E9AKB8     | tr E9AKB8 E9AKB8_LEIMU | Putative nucleolar RNA he    | 11 |
| 3.549944917 | 1.6298 | E9B422     | tr E9B422 E9B422_LEIMU | Putative ABC transporter C   | 8  |
| 3.512951016 | 1.6295 | E9AQ02     | tr E9AQ02 E9AQ02_LEIMU | NADH-cytochrome b5 rec       | 3  |
| 3.23865034  | 1.6294 | E9AND8     | tr E9AND8 E9AND8_LEIMU | Uncharacterized protein      | 2  |
| 3.806691736 | 1.6292 | E9B6L3;B0F | tr E9B6L3 E9B6L3_LEIMU | 6-phosphogluconate dehy      | 10 |
| 3.910815632 | 1.6286 | E9B0P1     | tr E9B0P1 E9B0P1_LEIMU | Importin subunit alpha OS    | 8  |
| 3.797939883 | 1.6285 | E9AM76     | tr E9AM76 E9AM76_LEIMU | Ribosomal protein L3-lik     | 3  |
| 3.833597378 | 1.6284 | E9AWE0     | tr E9AWE0 E9AWE0_LEIMU | T-complex protein 1 sub      | 21 |
| 4.216767377 | 1.628  | E9AZE0     | tr E9AZE0 E9AZE0_LEIMU | Obg-like ATPase 1 OS=Leis    | 6  |
| 3.859460519 | 1.6279 | E9AZV5     | tr E9AZV5 E9AZV5_LEIMU | Haloacid dehalogenase-lik    | 2  |
| 3.73233259  | 1.6271 | E9B687     | tr E9B687 E9B687_LEIMU | Putative kinesin OS=Leishr   | 11 |
| 4.053369991 | 1.6268 | E9AYF0     | tr E9AYF0 E9AYF0_LEIMU | Putative cytochrome c oxid   | 7  |
| 3.541238956 | 1.6256 | E9AKJ8     | tr E9AKJ8 E9AKJ8_LEIMU | Putative paraflagellar rod p | 2  |
| 3.254635462 | 1.6252 | E9B3V2     | tr E9B3V2 E9B3V2_LEIMU | 33 kDa inner dynein arm I    | 3  |
| 2.494206306 | 1.6248 | E9AQN4     | tr E9AQN4 E9AQN4_LEIMU | Uncharacterized protein      | 2  |
| 3.184139872 | 1.6248 | E9AXS4     | tr E9AXS4 E9AXS4_LEIMU | Uncharacterized protein C    | 2  |
| 4.285698581 | 1.6248 | E9B229     | tr E9B229 E9B229_LEIMU | Putative ADP-ribosylation    | 4  |
| 3.530315029 | 1.6246 | E9ATV8     | tr E9ATV8 E9ATV8_LEIMU | Putative glycosyl hydrolas   | 2  |
| 3.672562601 | 1.6241 | E9AS23     | tr E9AS23 E9AS23_LEIMU | Glycosomal malate dehydi     | 9  |
| 3.781000624 | 1.6238 | E9ASG1     | tr E9ASG1 E9ASG1_LEIMU | Uncharacterized protein C    | 9  |
| 3.600841185 | 1.6237 | E9B4A1     | tr E9B4A1 E9B4A1_LEIMU | Mitochondrial processing     | 6  |
| 3.908598457 | 1.6232 | E9AMV9;E9  | tr E9AMV9 E9AMV9_LEIMU | Putative eukaryotic tran     | 10 |
| 3.350802317 | 1.6232 | E9AV06     | tr E9AV06 E9AV06_LEIMU | Uncharacterized protein C    | 2  |
| 3.48607948  | 1.6227 | E9B5G5     | tr E9B5G5 E9B5G5_LEIMU | Serine palmitoyltransfera    | 9  |
| 3.398814395 | 1.6219 | E9AXP7     | tr E9AXP7 E9AXP7_LEIMU | Uncharacterized protein C    | 5  |
| 4.200832961 | 1.6218 | E9B4Z4     | tr E9B4Z4 E9B4Z4_LEIMU | Uncharacterized protein O    | 3  |

|             |        |            |                                                     |    |
|-------------|--------|------------|-----------------------------------------------------|----|
| 3.818393709 | 1.6201 | E9AM57     | tr E9AM57 E9AM57_LEIMU Uncharacterized protein      | 2  |
| 3.640619231 | 1.6198 | E9ALE8     | tr E9ALE8 E9ALE8_LEIMU Uncharacterized protein O    | 7  |
| 3.921575379 | 1.6198 | E9AQ43     | tr E9AQ43 E9AQ43_LEIMU Uncharacterized protein (    | 4  |
| 4.383669822 | 1.6195 | E9B0D0     | tr E9B0D0 E9B0D0_LEIMU Uncharacterized protein C    | 2  |
| 3.920562362 | 1.6192 | E9AUU6     | tr E9AUU6 E9AUU6_LEIMU Putative 40S ribosomal p     | 4  |
| 4.004039147 | 1.6188 | E9AR70     | tr E9AR70 E9AR70_LEIMU Uncharacterized protein C    | 5  |
| 3.843367645 | 1.6188 | E9AKA4;C6K | tr E9AKA4 E9AKA4_LEIMU Actin OS=Leishmania mex      | 11 |
| 3.331060923 | 1.6188 | E9AL95     | tr E9AL95 E9AL95_LEIMU Flavoprotein subunit-like p  | 10 |
| 4.386924082 | 1.6184 | E9AJQ4     | tr E9AJQ4 E9AJQ4_LEIMU Putative U2 splicing auxilia | 5  |
| 3.895169089 | 1.6177 | E9B435     | tr E9B435 E9B435_LEIMU RNA editing complex prote    | 2  |
| 3.622786425 | 1.6177 | E9AZZ3     | tr E9AZZ3 E9AZZ3_LEIMU Uncharacterized protein O    | 3  |
| 3.821161709 | 1.6176 | E9AUD5     | tr E9AUD5 E9AUD5_LEIMU Putative eukaryotic trans    | 17 |
| 3.724648939 | 1.6169 | E9B6S2     | tr E9B6S2 E9B6S2_LEIMU Uncharacterized protein O    | 3  |
| 4.01221522  | 1.6168 | E9B178     | tr E9B178 E9B178_LEIMU Eukaryotic translation initi | 7  |
| 3.62836521  | 1.6168 | E9AV89     | tr E9AV89 E9AV89_LEIMU Putative 60S ribosomal pr    | 7  |
| 3.176986448 | 1.6165 | E9B2M1     | tr E9B2M1 E9B2M1_LEIMU Putative calpain-like cyst   | 3  |
| 3.339670806 | 1.6162 | E9ASS3     | tr E9ASS3 E9ASS3_LEIMU Uncharacterized protein O    | 3  |
| 3.81435281  | 1.6158 | E9AYH6     | tr E9AYH6 E9AYH6_LEIMU Uncharacterized protein C    | 27 |
| 3.913891088 | 1.6158 | E9APY5     | tr E9APY5 E9APY5_LEIMU Putative tyrosyl-tRNA synt   | 6  |
| 3.35159955  | 1.6156 | E9AY14     | tr E9AY14 E9AY14_LEIMU C-1-tetrahydrofolate synt    | 9  |
| 3.747314366 | 1.6155 | E9AL32     | tr E9AL32 E9AL32_LEIMU Uncharacterized protein O    | 9  |
| 3.710983949 | 1.6154 | E9AUB0     | tr E9AUB0 E9AUB0_LEIMU Putative prolyl oligopepti   | 11 |
| 3.603403095 | 1.6152 | E9AZF7     | tr E9AZF7 E9AZF7_LEIMU Uncharacterized protein O    | 3  |
| 3.473930922 | 1.6151 | E9AJQ1     | tr E9AJQ1 E9AJQ1_LEIMU Putative ABC transporter p   | 9  |
| 3.344876517 | 1.6142 | E9AMV7     | tr E9AMV7 E9AMV7_LEIMU Uncharacterized protein      | 2  |
| 3.688069189 | 1.6133 | E9B2T7     | tr E9B2T7 E9B2T7_LEIMU Uncharacterized protein O    | 2  |
| 3.895148754 | 1.6132 | E9AZE9     | tr E9AZE9 E9AZE9_LEIMU Putative heat shock protei   | 10 |
| 3.95911252  | 1.613  | E9AKN1;Q6S | tr E9AKN1 E9AKN1_LEIMU Uncharacterized protein C    | 11 |
| 3.561385712 | 1.6129 | E9AMX3     | tr E9AMX3 E9AMX3_LEIMU Putative AAA family ATP      | 13 |
| 3.785952909 | 1.6126 | E9ASZ0     | tr E9ASZ0 E9ASZ0_LEIMU Putative DEAD box RNA he     | 10 |
| 3.653393621 | 1.6119 | E9AZJ9     | tr E9AZJ9 E9AZJ9_LEIMU Uncharacterized protein OS   | 5  |
| 3.643957328 | 1.6114 | E9AQ96     | tr E9AQ96 E9AQ96_LEIMU Putative NAD/FAD depen       | 3  |
| 3.99105348  | 1.6114 | E9B5Y1;E9B | tr E9B5Y1 E9B5Y1_LEIMU Putative casein kinase OS=   | 10 |
| 5.121354373 | 1.6111 | Q0PKV3;E9A | tr Q0PKV3 Q0PKV3_LEIME Putative glycogen synthas    | 7  |
| 2.938679714 | 1.6109 | E9B1T5     | tr E9B1T5 E9B1T5_LEIMU Uncharacterized protein O    | 2  |
| 3.565287124 | 1.6105 | E9B4H4;Q8I | tr E9B4H4 E9B4H4_LEIMU Glucose-6-phosphate 1-d      | 5  |
| 3.896880452 | 1.6103 | E9APW0     | tr E9APW0 E9APW0_LEIMU Uncharacterized protein      | 3  |
| 3.996490573 | 1.61   | E9AK64     | tr E9AK64 E9AK64_LEIMU Pescadillo homolog OS=Le     | 8  |
| 3.798337055 | 1.6093 | E9AYI0     | tr E9AYI0 E9AYI0_LEIMU Uncharacterized protein OS   | 6  |
| 4.422815741 | 1.6085 | E9APV3     | tr E9APV3 E9APV3_LEIMU Uncharacterized protein C    | 4  |
| 3.550476646 | 1.6077 | E9AQW2     | tr E9AQW2 E9AQW2_LEIMU Uncharacterized protei       | 6  |
| 3.730702446 | 1.6077 | E9AQC2     | tr E9AQC2 E9AQC2_LEIMU Putative ubiquitin hydroli   | 6  |
| 4.094250508 | 1.6075 | E9AX01     | tr E9AX01 E9AX01_LEIMU Uncharacterized protein C    | 12 |
| 4.433572066 | 1.6073 | E9AQC9     | tr E9AQC9 E9AQC9_LEIMU Uncharacterized protein      | 3  |
| 3.609080585 | 1.6073 | E9B235     | tr E9B235 E9B235_LEIMU Uncharacterized protein C    | 8  |
| 3.217133442 | 1.6072 | E9ALL4     | tr E9ALL4 E9ALL4_LEIMU Uncharacterized protein O    | 2  |
| 4.401985657 | 1.6066 | E9AUQ2     | tr E9AUQ2 E9AUQ2_LEIMU DNAj-like protein OS=Lei     | 3  |
| 3.078763404 | 1.6065 | E9AQU5     | tr E9AQU5 E9AQU5_LEIMU Uncharacterized protein      | 5  |
| 4.032817301 | 1.6056 | E9AZ87     | tr E9AZ87 E9AZ87_LEIMU Paraflagellar rod protein-li | 6  |
| 3.777282058 | 1.6055 | E9ANP7     | tr E9ANP7 E9ANP7_LEIMU Uncharacterized protein C    | 4  |



|             |        |            |                                                     |    |
|-------------|--------|------------|-----------------------------------------------------|----|
| 3.959249567 | 1.6052 | E9B3F4     | tr E9B3F4 E9B3F4_LEIMU Uncharacterized protein O    | 3  |
| 4.468938201 | 1.6049 | E9ALV7     | tr E9ALV7 E9ALV7_LEIMU Tryparedoxin OS=Leishma      | 4  |
| 3.970017605 | 1.6046 | E9B1A6     | tr E9B1A6 E9B1A6_LEIMU Uncharacterized protein C    | 9  |
| 3.326995661 | 1.604  | E9API6     | tr E9API6 E9API6_LEIMU Squalene monooxygenase-l     | 4  |
| 4.069246713 | 1.6034 | E9B0L0     | tr E9B0L0 E9B0L0_LEIMU Uncharacterized protein O    | 3  |
| 3.563499358 | 1.6031 | E9AK29     | tr E9AK29 E9AK29_LEIMU 60S ribosomal protein L11    | 8  |
| 3.901599348 | 1.6029 | E9ALE3     | tr E9ALE3 E9ALE3_LEIMU Uncharacterized protein O    | 2  |
| 3.599491147 | 1.6024 | E9B620     | tr E9B620 E9B620_LEIMU Putative threonyl-tRNA sy    | 14 |
| 3.58460741  | 1.6023 | E9B6Z6     | tr E9B6Z6 E9B6Z6_LEIMU Putative katanin OS=Leishi   | 3  |
| 2.196194194 | 1.6018 | E9B682     | tr E9B682 E9B682_LEIMU Putative ankyrin repeat pr   | 2  |
| 3.769490739 | 1.6015 | E9AXQ3     | tr E9AXQ3 E9AXQ3_LEIMU Pyruvate dehydrogenase       | 11 |
| 3.877992245 | 1.6012 | E9B1Q4     | tr E9B1Q4 E9B1Q4_LEIMU Biotin/lipoate protein liga  | 4  |
| 3.993665455 | 1.6011 | E9ARQ8     | tr E9ARQ8 E9ARQ8_LEIMU Putative prolyl-tRNA synt    | 5  |
| 3.363468349 | 1.5998 | E9AMU9     | tr E9AMU9 E9AMU9_LEIMU Elongation factor-1 garr     | 11 |
| 3.871091595 | 1.5994 | E9AXG9     | tr E9AXG9 E9AXG9_LEIMU Peptidyl-prolyl cis-trans is | 6  |
| 3.05634339  | 1.5989 | E9ATL8     | tr E9ATL8 E9ATL8_LEIMU Uncharacterized protein O    | 2  |
| 3.658864243 | 1.5977 | E9B3J7     | tr E9B3J7 E9B3J7_LEIMU Uncharacterized protein OS   | 3  |
| 3.81717328  | 1.5977 | E9ATZ6     | tr E9ATZ6 E9ATZ6_LEIMU Putative isoleucyl-tRNA sy   | 17 |
| 3.70653569  | 1.5975 | E9AW86     | tr E9AW86 E9AW86_LEIMU Acetyl-coenzyme A synt       | 5  |
| 4.831275954 | 1.5974 | E9AUV0     | tr E9AUV0 E9AUV0_LEIMU Soluble n-ethylmaleimide     | 5  |
| 3.561000594 | 1.5969 | E9B4I0     | tr E9B4I0 E9B4I0_LEIMU Malate dehydrogenase OS=     | 3  |
| 3.735528334 | 1.5967 | E9AXU0     | tr E9AXU0 E9AXU0_LEIMU Elongation factor 2-like p   | 5  |
| 3.863389224 | 1.5965 | E9AQN5     | tr E9AQN5 E9AQN5_LEIMU Transaldolase OS=Leishn      | 7  |
| 3.672476833 | 1.5957 | E9ARL9     | tr E9ARL9 E9ARL9_LEIMU Uncharacterized protein O    | 45 |
| 3.566330732 | 1.5957 | E9AZ72     | tr E9AZ72 E9AZ72_LEIMU Uncharacterized protein C    | 3  |
| 3.216515215 | 1.5956 | E9B5S0     | tr E9B5S0 E9B5S0_LEIMU Putative serine palmitoyltr  | 9  |
| 3.461553993 | 1.5942 | E9AYT2     | tr E9AYT2 E9AYT2_LEIMU Putative methylmalonyl-cc    | 8  |
| 3.798929104 | 1.5941 | E9AZS9     | tr E9AZS9 E9AZS9_LEIMU Uncharacterized protein O    | 8  |
| 3.525362307 | 1.5934 | E9AYC1     | tr E9AYC1 E9AYC1_LEIMU Uncharacterized protein C    | 2  |
| 4.149042967 | 1.5933 | E9B2Y3     | tr E9B2Y3 E9B2Y3_LEIMU Putative ras-related protei  | 2  |
| 3.274601723 | 1.5933 | E9AJU0     | tr E9AJU0 E9AJU0_LEIMU Putative quinone oxidored    | 3  |
| 3.72819766  | 1.593  | E9B371     | tr E9B371 E9B371_LEIMU Putative ubiquitin hydrola   | 7  |
| 4.086517356 | 1.5928 | E9ASA6     | tr E9ASA6 E9ASA6_LEIMU Peptidylprolyl isomerase C   | 9  |
| 3.711459835 | 1.5927 | E9AVD4     | tr E9AVD4 E9AVD4_LEIMU Uncharacterized protein C    | 5  |
| 3.385043907 | 1.5925 | E9ASH6;OOC | tr E9ASH6 E9ASH6_LEIMU Elongation factor G, mitoc   | 13 |
| 4.359098038 | 1.5923 | E9B215     | tr E9B215 E9B215_LEIMU Prostaglandin f2-alpha syn   | 9  |
| 3.988864631 | 1.5922 | E9B352     | tr E9B352 E9B352_LEIMU Uncharacterized protein C    | 2  |
| 3.695640888 | 1.5917 | E9AVW8     | tr E9AVW8 E9AVW8_LEIMU Putative farnesyl pyropl     | 4  |
| 4.130567762 | 1.5914 | E9AUU5     | tr E9AUU5 E9AUU5_LEIMU Phosphatase-like protein     | 2  |
| 4.170283743 | 1.591  | E9ARA9     | tr E9ARA9 E9ARA9_LEIMU Putative L-gulonolactone     | 2  |
| 2.96489605  | 1.5907 | E9ALC3     | tr E9ALC3 E9ALC3_LEIMU Cation-transporting ATPas    | 8  |
| 3.478346122 | 1.5902 | E9AVK4     | tr E9AVK4 E9AVK4_LEIMU Uncharacterized protein C    | 9  |
| 3.624241974 | 1.5899 | E9ARS0     | tr E9ARS0 E9ARS0_LEIMU Uncharacterized protein C    | 3  |
| 3.345727677 | 1.5897 | E9ANJ5     | tr E9ANJ5 E9ANJ5_LEIMU Tetratricopeptide repeat (   | 3  |
| 3.091333642 | 1.5896 | E9B3T0     | tr E9B3T0 E9B3T0_LEIMU Uncharacterized protein O    | 5  |
| 4.061429593 | 1.5891 | E9ATK7     | tr E9ATK7 E9ATK7_LEIMU Uncharacterized protein C    | 23 |
| 3.965346672 | 1.589  | E9B038     | tr E9B038 E9B038_LEIMU Uncharacterized protein C    | 18 |
| 3.723991608 | 1.5881 | E9AWR8     | tr E9AWR8 E9AWR8_LEIMU Putative malic enzyme C      | 7  |
| 3.717944139 | 1.5872 | E9B387     | tr E9B387 E9B387_LEIMU Serine/threonine-protein     | 5  |
| 3.771602533 | 1.5872 | E9AJJ4     | tr E9AJJ4 E9AJJ4_LEIMU Uncharacterized protein OS   | 13 |

|             |        |            |                        |                              |    |
|-------------|--------|------------|------------------------|------------------------------|----|
| 3.029130363 | 1.5866 | E9AVJ1     | tr E9AVJ1 E9AVJ1_LEIMU | Transcription factor-like pr | 2  |
| 3.669082042 | 1.5862 | E9ASQ6     | tr E9ASQ6 E9ASQ6_LEIMU | Transitional endoplasmic     | 21 |
| 3.604270387 | 1.5862 | E9AX88     | tr E9AX88 E9AX88_LEIMU | Putative electron transfer   | 8  |
| 3.190909583 | 1.5859 | E9B0K5     | tr E9B0K5 E9B0K5_LEIMU | Mitochondrial oligo_U bin    | 5  |
| 3.368475761 | 1.5858 | E9AYZ3     | tr E9AYZ3 E9AYZ3_LEIMU | Uncharacterized protein O    | 2  |
| 4.045176805 | 1.585  | E9AJY1     | tr E9AJY1 E9AJY1_LEIMU | Uncharacterized protein O    | 3  |
| 3.975659653 | 1.585  | E9AS20;E9A | tr E9AS20 E9AS20_LEIMU | Putative kinesin OS=Leishr   | 7  |
| 3.06024738  | 1.5848 | E9B5U2     | tr E9B5U2 E9B5U2_LEIMU | Uncharacterized protein C    | 2  |
| 3.690245589 | 1.5846 | E9B3G5     | tr E9B3G5 E9B3G5_LEIMU | Putative myosin heavy ch     | 14 |
| 4.129535524 | 1.5836 | E9ASV6     | tr E9ASV6 E9ASV6_LEIMU | Putative DEAD box RNA h      | 2  |
| 3.752763069 | 1.5833 | E9B6S3;A0A | tr E9B6S3 E9B6S3_LEIMU | Putative PRP8 protein hor    | 10 |
| 4.342767583 | 1.5824 | E9AK52     | tr E9AK52 E9AK52_LEIMU | Uncharacterized protein C    | 2  |
| 3.391461759 | 1.582  | E9B6T1     | tr E9B6T1 E9B6T1_LEIMU | RNA helicase OS=Leishmar     | 5  |
| 4.184303754 | 1.5817 | E9B5X5     | tr E9B5X5 E9B5X5_LEIMU | Uncharacterized protein C    | 7  |
| 3.359629256 | 1.5815 | E9AYF9     | tr E9AYF9 E9AYF9_LEIMU | Uncharacterized protein O    | 22 |
| 4.525653393 | 1.5814 | E9AXZ5     | tr E9AXZ5 E9AXZ5_LEIMU | Adenine phosphoribosyltr     | 3  |
| 4.29687879  | 1.5813 | E9ALV8;A5J | tr E9ALV8 E9ALV8_LEIMU | Putative tryparedoxin OS=    | 2  |
| 4.742804819 | 1.5812 | E9B3I3     | tr E9B3I3 E9B3I3_LEIMU | Uncharacterized protein OS   | 2  |
| 3.658168667 | 1.5812 | E9B6A7     | tr E9B6A7 E9B6A7_LEIMU | ATP-dependent RNA helic      | 3  |
| 3.38150211  | 1.5811 | E9B119     | tr E9B119 E9B119_LEIMU | Putative heat shock 70-rel   | 2  |
| 3.067359181 | 1.5804 | E9ALP4     | tr E9ALP4 E9ALP4_LEIMU | Putative 40S ribosomal pr    | 6  |
| 3.627255482 | 1.5799 | E9B260;Q25 | tr E9B260 E9B260_LEIMU | DNA-directed RNA polyme      | 15 |
| 3.379877421 | 1.5796 | E9AUC5     | tr E9AUC5 E9AUC5_LEIMU | Putative nuclear pore cor    | 8  |
| 3.556435565 | 1.5793 | E9ASC6     | tr E9ASC6 E9ASC6_LEIMU | Leucine carboxyl methyltr    | 4  |
| 3.692910734 | 1.5792 | E9ARN1     | tr E9ARN1 E9ARN1_LEIMU | Uncharacterized protein C    | 9  |
| 3.569288699 | 1.5788 | Q9GRS9;E9E | tr Q9GRS9 Q9GRS9_LEIME | Mannose-6-phosphate is       | 4  |
| 3.724167204 | 1.5788 | E9ANS9     | tr E9ANS9 E9ANS9_LEIMU | Uncharacterized protein C    | 3  |
| 3.97246858  | 1.5788 | E9AZA7;E9A | tr E9AZA7 E9AZA7_LEIMU | Branched-chain-amino-ac      | 10 |
| 3.278795493 | 1.5786 | E9B6R9     | tr E9B6R9 E9B6R9_LEIMU | Uncharacterized protein C    | 4  |
| 3.56345661  | 1.5786 | E9AQE4     | tr E9AQE4 E9AQE4_LEIMU | Phosphodiesterase OS=Le      | 2  |
| 3.592247154 | 1.5778 | E9AW05     | tr E9AW05 E9AW05_LEIMU | Peptidyl-prolyl cis-trans    | 2  |
| 3.65384121  | 1.5777 | E9ARA1     | tr E9ARA1 E9ARA1_LEIMU | Putative translation initia  | 16 |
| 3.072152167 | 1.5777 | E9AYK3     | tr E9AYK3 E9AYK3_LEIMU | Putative GDP-mannose 4,(     | 2  |
| 4.42523577  | 1.5774 | E9APT0     | tr E9APT0 E9APT0_LEIMU | Putative calpain-like cyste  | 2  |
| 3.883771036 | 1.5762 | E9AZM2     | tr E9AZM2 E9AZM2_LEIMU | Putative dynein heavy ch     | 29 |
| 3.249537066 | 1.5761 | E9B2U5     | tr E9B2U5 E9B2U5_LEIMU | Uncharacterized protein C    | 3  |
| 4.080893506 | 1.5756 | E9B2C5     | tr E9B2C5 E9B2C5_LEIMU | Uncharacterized protein C    | 9  |
| 3.967854844 | 1.5753 | E9AW29;A0. | tr E9AW29 E9AW29_LEIMU | Putative argininosuccina     | 6  |
| 3.401344903 | 1.5752 | E9B2B3     | tr E9B2B3 E9B2B3_LEIMU | Methylcrotonoyl-coa carb     | 10 |
| 3.737589064 | 1.5745 | E9AVB6     | tr E9AVB6 E9AVB6_LEIMU | Uncharacterized protein C    | 3  |
| 4.139046432 | 1.5743 | E9AP81     | tr E9AP81 E9AP81_LEIMU | 40S ribosomal protein S12    | 9  |
| 3.144197435 | 1.5743 | E9B4T0     | tr E9B4T0 E9B4T0_LEIMU | Dihydroxyacetonephospha      | 7  |
| 3.379845808 | 1.5738 | Q8MPM3;E9E | tr Q8MPM3 Q8MPM3_LEIME | Transketolase OS=Leis        | 9  |
| 3.764870241 | 1.5732 | E9AUL9     | tr E9AUL9 E9AUL9_LEIMU | Putative vesicle-fusing AT   | 11 |
| 3.218958256 | 1.573  | E9AS92     | tr E9AS92 E9AS92_LEIMU | Putative cation transporte   | 2  |
| 3.813000158 | 1.5729 | E9AZ36     | tr E9AZ36 E9AZ36_LEIMU | Uncharacterized protein C    | 14 |
| 3.791963095 | 1.5724 | E9AT50     | tr E9AT50 E9AT50_LEIMU | Uncharacterized protein C    | 5  |
| 2.932324457 | 1.5722 | E9B3N4     | tr E9B3N4 E9B3N4_LEIMU | Uncharacterized protein C    | 3  |
| 3.486949073 | 1.5719 | E9AUQ7;E9A | tr E9AUQ7 E9AUQ7_LEIMU | Calpain-like cysteine pep    | 12 |
| 3.713607395 | 1.5718 | E9B1H5     | tr E9B1H5 E9B1H5_LEIMU | Putative ATP-dependent f     | 11 |

|             |        |            |                                                    |    |
|-------------|--------|------------|----------------------------------------------------|----|
| 3.899543406 | 1.5717 | E9AN05     | tr E9AN05 E9AN05_LEIMU Uncharacterized protein (   | 2  |
| 3.84660835  | 1.5717 | E9ATH3     | tr E9ATH3 E9ATH3_LEIMU Adenosylhomocysteinase      | 7  |
| 3.138274168 | 1.5711 | E9AVB8     | tr E9AVB8 E9AVB8_LEIMU Structural maintenance o    | 2  |
| 3.17238606  | 1.5692 | E9AKV2     | tr E9AKV2 E9AKV2_LEIMU Threonine ammonia-lyase     | 4  |
| 3.441067134 | 1.5686 | E9AT19     | tr E9AT19 E9AT19_LEIMU Dipeptidyl-peptidase 8-like | 4  |
| 4.195028177 | 1.5685 | E9B520     | tr E9B520 E9B520_LEIMU Putative asparaginyl-tRNA   | 14 |
| 3.868394427 | 1.5685 | E9AQ01     | tr E9AQ01 E9AQ01_LEIMU Uncharacterized protein (   | 5  |
| 3.83387523  | 1.5682 | E9AZQ5     | tr E9AZQ5 E9AZQ5_LEIMU Ribonucleoside-diphosph     | 8  |
| 3.395070989 | 1.5676 | E9B037     | tr E9B037 E9B037_LEIMU Uncharacterized protein C   | 3  |
| 3.528313906 | 1.5674 | E9ASD6     | tr E9ASD6 E9ASD6_LEIMU Elongation factor 2 OS=Le   | 36 |
| 3.173679062 | 1.5674 | E9ARL1     | tr E9ARL1 E9ARL1_LEIMU Putative elongation factor  | 19 |
| 3.160794661 | 1.5663 | E9AW23     | tr E9AW23 E9AW23_LEIMU Putative multidrug resist   | 2  |
| 5.127843345 | 1.5658 | E9B354     | tr E9B354 E9B354_LEIMU Uncharacterized protein C   | 2  |
| 4.012777075 | 1.5648 | E9B1W8     | tr E9B1W8 E9B1W8_LEIMU Uncharacterized protein     | 3  |
| 3.30464291  | 1.564  | E9AZB9     | tr E9AZB9 E9AZB9_LEIMU Uncharacterized protein C   | 3  |
| 3.463130064 | 1.5638 | E9B1K6     | tr E9B1K6 E9B1K6_LEIMU Mevalonate kinase OS=Lei    | 5  |
| 3.310522103 | 1.5636 | E9B5N0     | tr E9B5N0 E9B5N0_LEIMU Serine/threonine-protein    | 5  |
| 3.735888728 | 1.5627 | E9AQ75     | tr E9AQ75 E9AQ75_LEIMU Uncharacterized protein (   | 5  |
| 3.449252681 | 1.5625 | E9B083     | tr E9B083 E9B083_LEIMU Uncharacterized protein C   | 3  |
| 3.145356241 | 1.5624 | E9AUZ5     | tr E9AUZ5 E9AUZ5_LEIMU Uncharacterized protein (   | 3  |
| 3.541832069 | 1.5624 | E9AXI1     | tr E9AXI1 E9AXI1_LEIMU Dehydrogenase-like proteir  | 2  |
| 3.952795319 | 1.5622 | E9AKP2     | tr E9AKP2 E9AKP2_LEIMU Proteasome subunit beta     | 2  |
| 3.199156981 | 1.5619 | E9AK26     | tr E9AK26 E9AK26_LEIMU Putative calpain-like cyste | 6  |
| 3.736897701 | 1.5612 | E9APL2     | tr E9APL2 E9APL2_LEIMU Uncharacterized protein O   | 5  |
| 3.770497726 | 1.561  | E9B2Z5     | tr E9B2Z5 E9B2Z5_LEIMU Uncharacterized protein O   | 15 |
| 4.243953541 | 1.5609 | E9AS94     | tr E9AS94 E9AS94_LEIMU Uncharacterized protein O   | 4  |
| 4.169579272 | 1.5607 | E9AJQ8     | tr E9AJQ8 E9AJQ8_LEIMU Putative long chain fatty A | 5  |
| 3.293950508 | 1.5606 | E9ANJ4     | tr E9ANJ4 E9ANJ4_LEIMU Uncharacterized protein O   | 6  |
| 3.349143677 | 1.5602 | E9AZH5     | tr E9AZH5 E9AZH5_LEIMU Putative pantothenate kir   | 8  |
| 3.671459318 | 1.5596 | E9B0I8     | tr E9B0I8 E9B0I8_LEIMU Putative histidyl-tRNA synt | 7  |
| 4.040229601 | 1.5586 | E8NHL4     | tr E8NHL4 E8NHL4_LEIMU Brix domain containing-lik  | 4  |
| 4.080993765 | 1.5585 | E9B2N1     | tr E9B2N1 E9B2N1_LEIMU Putative dynein OS=Leish    | 9  |
| 3.763546232 | 1.5585 | E9B288     | tr E9B288 E9B288_LEIMU Uncharacterized protein C   | 4  |
| 3.462528793 | 1.5585 | Q2TUW2;E9  | tr Q2TUW2 Q2TUW2_LEIAM Inosine-5-monophosph        | 11 |
| 3.357226743 | 1.5571 | E9B0N3     | tr E9B0N3 E9B0N3_LEIMU Uncharacterized protein (   | 5  |
| 3.607909328 | 1.5559 | E9ATB5     | tr E9ATB5 E9ATB5_LEIMU Uncharacterized protein C   | 2  |
| 3.626144974 | 1.5558 | E9B4L7     | tr E9B4L7 E9B4L7_LEIMU Putative importin beta-1 si | 8  |
| 3.50181324  | 1.5557 | E9ALC7     | tr E9ALC7 E9ALC7_LEIMU Uncharacterized protein O   | 3  |
| 3.685368014 | 1.5551 | Q6TUJ5;E9B | tr Q6TUJ5 Q6TUJ5_LEIME Arginase OS=Leishmania n    | 5  |
| 4.113926999 | 1.5548 | E9B5E5     | tr E9B5E5 E9B5E5_LEIMU Uncharacterized protein O   | 4  |
| 3.280443733 | 1.5545 | E9B528     | tr E9B528 E9B528_LEIMU Glycosyltransferase-like pr | 5  |
| 3.382094826 | 1.5543 | E9AKI1     | tr E9AKI1 E9AKI1_LEIMU Uncharacterized protein OS  | 4  |
| 3.956289479 | 1.5542 | E9B2G1     | tr E9B2G1 E9B2G1_LEIMU Putative ATP-dependent f    | 17 |
| 3.779569234 | 1.5535 | E9AVR3     | tr E9AVR3 E9AVR3_LEIMU Uncharacterized protein (   | 2  |
| 3.643608942 | 1.5533 | E9AST4     | tr E9AST4 E9AST4_LEIMU Clathrin heavy chain OS=Le  | 44 |
| 3.456066289 | 1.5528 | E9AMV3     | tr E9AMV3 E9AMV3_LEIMU Uncharacterized protein     | 15 |
| 3.643854463 | 1.5526 | E9B6K2     | tr E9B6K2 E9B6K2_LEIMU Putative cystathione gamr   | 12 |
| 3.065660563 | 1.552  | E9AUX8     | tr E9AUX8 E9AUX8_LEIMU Putative calpain OS=Leish   | 4  |
| 3.881834884 | 1.5515 | E9AP50     | tr E9AP50 E9AP50_LEIMU Uncharacterized protein C   | 11 |
| 3.395782465 | 1.5513 | E9B478     | tr E9B478 E9B478_LEIMU Putative heat shock protei  | 26 |

|             |        |            |                        |                              |    |
|-------------|--------|------------|------------------------|------------------------------|----|
| 3.86385567  | 1.5512 | E9AQE5;B8k | tr E9AQE5 E9AQE5_LEIMU | Phosphodiesterase OS=Le      | 6  |
| 3.829653364 | 1.5501 | E9ARS1     | tr E9ARS1 E9ARS1_LEIMU | Putative heat shock protei   | 32 |
| 3.379887033 | 1.549  | E9ALX8     | tr E9ALX8 E9ALX8_LEIMU | Uncharacterized protein O    | 14 |
| 3.572813451 | 1.5476 | E9B3W9     | tr E9B3W9 E9B3W9_LEIMU | Cysteine conjugate beta-     | 7  |
| 4.110367498 | 1.5475 | E9AZN0     | tr E9AZN0 E9AZN0_LEIMU | Serine/threonine-protein     | 8  |
| 3.789558504 | 1.5463 | E9AU41     | tr E9AU41 E9AU41_LEIMU | Uncharacterized protein (    | 20 |
| 3.725859504 | 1.5462 | E9AUS4     | tr E9AUS4 E9AUS4_LEIMU | Coatomer subunit beta O:     | 19 |
| 3.907591842 | 1.5447 | E9B6C8     | tr E9B6C8 E9B6C8_LEIMU | Uncharacterized protein C    | 3  |
| 3.653824497 | 1.5445 | E9AN39     | tr E9AN39 E9AN39_LEIMU | Isocitrate dehydrogenase     | 20 |
| 4.138588647 | 1.5443 | E9AWR7     | tr E9AWR7 E9AWR7_LEIMU | Malic enzyme OS=Leishr       | 11 |
| 3.966361957 | 1.5439 | E9AWM1     | tr E9AWM1 E9AWM1_LEIMU | Putative fumarate hyd        | 9  |
| 3.646134298 | 1.5434 | E9ALL7     | tr E9ALL7 E9ALL7_LEIMU | Uncharacterized protein O:   | 6  |
| 4.115040432 | 1.5434 | E9B6Q7     | tr E9B6Q7 E9B6Q7_LEIMU | Putative 60S ribosomal pr    | 4  |
| 3.492568638 | 1.5426 | E9AQL8;Q9M | tr E9AQL8 E9AQL8_LEIMU | Putative carbamoyl-phosp     | 54 |
| 3.637430552 | 1.5424 | E9AU34     | tr E9AU34 E9AU34_LEIMU | Uncharacterized protein (    | 2  |
| 3.299112069 | 1.5413 | E9AYU0     | tr E9AYU0 E9AYU0_LEIMU | Putative nucleoporin OS=     | 4  |
| 3.849287698 | 1.5409 | Q4KXA7;E9A | tr Q4KXA7 Q4KXA7_LEIME | Cytoplasmic dynein heav      | 28 |
| 3.634959321 | 1.5407 | E9AV59     | tr E9AV59 E9AV59_LEIMU | Xanthine phosphoribosylt     | 4  |
| 3.796559553 | 1.5404 | E9AWL9     | tr E9AWL9 E9AWL9_LEIMU | Uncharacterized protein      | 6  |
| 3.911723494 | 1.5403 | E9B6R4     | tr E9B6R4 E9B6R4_LEIMU | T-complex protein 1 subur    | 17 |
| 3.483579214 | 1.5398 | E9AKU4     | tr E9AKU4 E9AKU4_LEIMU | Putative lanosterol synth    | 7  |
| 3.891920694 | 1.5396 | E9ARW6     | tr E9ARW6 E9ARW6_LEIMU | Uncharacterized proteir      | 9  |
| 4.004048011 | 1.5394 | E9AZ98     | tr E9AZ98 E9AZ98_LEIMU | Protein kinase-like protein  | 2  |
| 3.765099106 | 1.5378 | E9B5J2     | tr E9B5J2 E9B5J2_LEIMU | AP-1 complex subunit gam     | 6  |
| 3.940934308 | 1.5367 | E9AWZ3     | tr E9AWZ3 E9AWZ3_LEIMU | Uncharacterized protein      | 3  |
| 3.601358585 | 1.5366 | E9ARS2     | tr E9ARS2 E9ARS2_LEIMU | Putative pyruvate dehydr     | 11 |
| 4.628714378 | 1.5359 | E9B417     | tr E9B417 E9B417_LEIMU | Uncharacterized protein C    | 2  |
| 3.743159426 | 1.5352 | E9AVY6     | tr E9AVY6 E9AVY6_LEIMU | Alanine--tRNA ligase OS=L    | 26 |
| 3.704282203 | 1.5351 | E9AKF2     | tr E9AKF2 E9AKF2_LEIMU | Nucleolar GTP-binding pro    | 7  |
| 3.589523753 | 1.5351 | E9AQ25     | tr E9AQ25 E9AQ25_LEIMU | Putative nonspecific lipid   | 2  |
| 3.795298723 | 1.535  | E9ANI6     | tr E9ANI6 E9ANI6_LEIMU | Tubulin-tyrsoine ligase-like | 6  |
| 3.567435049 | 1.5343 | E9AL37     | tr E9AL37 E9AL37_LEIMU | Acetylornithine deacetylas   | 5  |
| 3.792947772 | 1.5339 | E9AVT1     | tr E9AVT1 E9AVT1_LEIMU | Uncharacterized protein C    | 6  |
| 4.041083741 | 1.5331 | E9B4T2     | tr E9B4T2 E9B4T2_LEIMU | Uncharacterized protein O    | 2  |
| 3.513175212 | 1.533  | E9AS51     | tr E9AS51 E9AS51_LEIMU | 4-coumarate:coa ligase-lik   | 10 |
| 3.552015828 | 1.5329 | E9AM36     | tr E9AM36 E9AM36_LEIMU | Uncharacterized protein      | 5  |
| 3.903360182 | 1.5324 | E9B0V3     | tr E9B0V3 E9B0V3_LEIMU | Uncharacterized protein C    | 10 |
| 4.03452519  | 1.5313 | E9AV37     | tr E9AV37 E9AV37_LEIMU | Putative ribonuclease L in   | 3  |
| 3.548036948 | 1.5311 | E9AXM1     | tr E9AXM1 E9AXM1_LEIMU | GTP-binding nuclear pro      | 9  |
| 3.536432023 | 1.5292 | E9B4G0     | tr E9B4G0 E9B4G0_LEIMU | Coatomer subunit beta O:     | 14 |
| 3.686682752 | 1.5286 | E9B0Y2;A0A | tr E9B0Y2 E9B0Y2_LEIMU | Putative alcohol dehydrog    | 2  |
| 4.222639539 | 1.5283 | E9ANB8     | tr E9ANB8 E9ANB8_LEIMU | Uncharacterized protein (    | 8  |
| 3.280994373 | 1.5275 | E9B6P8     | tr E9B6P8 E9B6P8_LEIMU | Putative Gim5A protein (G    | 12 |
| 4.141675872 | 1.5268 | E9AS22     | tr E9AS22 E9AS22_LEIMU | Putative kinesin OS=Leishr   | 12 |
| 3.228802596 | 1.5267 | E9ALR7     | tr E9ALR7 E9ALR7_LEIMU | Putative glutamamyl carbc    | 2  |
| 3.556316471 | 1.5264 | E9B6L6     | tr E9B6L6 E9B6L6_LEIMU | Uncharacterized protein O    | 3  |
| 3.778343446 | 1.5264 | E9B6Z9     | tr E9B6Z9 E9B6Z9_LEIMU | Putative MCAK-like kinesir   | 8  |
| 3.730806496 | 1.5256 | E9B5R1     | tr E9B5R1 E9B5R1_LEIMU | Uncharacterized protein C    | 2  |
| 3.279151024 | 1.5252 | E9AS62     | tr E9AS62 E9AS62_LEIMU | Putative mitochondrial car   | 2  |
| 3.642604117 | 1.5239 | E9B0L7     | tr E9B0L7 E9B0L7_LEIMU | Putative adenosine kinase    | 11 |

|             |        |             |                                                    |    |
|-------------|--------|-------------|----------------------------------------------------|----|
| 4.144400724 | 1.5233 | E9AU04      | tr E9AU04 E9AU04_LEIMU Uncharacterized protein C   | 3  |
| 3.528898517 | 1.5228 | E9AKX3      | tr E9AKX3 E9AKX3_LEIMU Putative glucosamine-fruc   | 8  |
| 3.690882103 | 1.5222 | E9ARX5      | tr E9ARX5 E9ARX5_LEIMU Uncharacterized protein C   | 4  |
| 3.275497147 | 1.522  | E9B458      | tr E9B458 E9B458_LEIMU Uncharacterized protein C   | 2  |
| 3.286141198 | 1.5204 | E9AZ08      | tr E9AZ08 E9AZ08_LEIMU Putative cysteine desulfur  | 7  |
| 3.60011154  | 1.5192 | E9AZA4      | tr E9AZA4 E9AZA4_LEIMU Uncharacterized protein C   | 2  |
| 3.621091598 | 1.519  | P16126;E9A  | sp P16126 DRTS_LEIAM Bifunctional dihydrofolate re | 11 |
| 3.375663999 | 1.5161 | E9AX08      | tr E9AX08 E9AX08_LEIMU Succinate dehydrogenase     | 17 |
| 3.306171619 | 1.5145 | E9AMQ4      | tr E9AMQ4 E9AMQ4_LEIMU Putative leucine-rich re    | 4  |
| 3.519409771 | 1.5144 | E9AL57      | tr E9AL57 E9AL57_LEIMU Acyl-CoA dehydrogenase, i   | 7  |
| 4.924709749 | 1.512  | E9AX98      | tr E9AX98 E9AX98_LEIMU Uncharacterized protein C   | 3  |
| 3.148043399 | 1.511  | E9AZ83;E9A  | tr E9AZ83 E9AZ83_LEIMU Glycosomal phosphoenolp     | 22 |
| 3.502715109 | 1.5102 | E9ARN6      | tr E9ARN6 E9ARN6_LEIMU UTP--glucose-1-phosphat     | 5  |
| 3.45081594  | 1.5084 | E9B5U7      | tr E9B5U7 E9B5U7_LEIMU Uncharacterized protein C   | 18 |
| 4.062178829 | 1.5082 | E9ASX5      | tr E9ASX5 E9ASX5_LEIMU Uncharacterized protein C   | 2  |
| 3.372829879 | 1.5071 | E9AKL2;E9A  | tr E9AKL2 E9AKL2_LEIMU Putative ATPase OS=Leishr   | 5  |
| 3.41021872  | 1.5066 | E9B0H2      | tr E9B0H2 E9B0H2_LEIMU Uncharacterized protein C   | 2  |
| 3.119484668 | 1.5066 | E8NHE3      | tr E8NHE3 E8NHE3_LEIMU Putative 60S ribosomal p    | 3  |
| 3.31942292  | 1.5062 | E9AY75      | tr E9AY75 E9AY75_LEIMU 60S ribosomal export prot   | 6  |
| 3.666546393 | 1.5062 | E9AP89      | tr E9AP89 E9AP89_LEIMU Palmitoyltransferase OS=L   | 2  |
| 3.676307315 | 1.5057 | E9AWM7      | tr E9AWM7 E9AWM7_LEIMU Putative aspartate ami      | 5  |
| 3.470677543 | 1.5049 | E9AZD6      | tr E9AZD6 E9AZD6_LEIMU Transcription elongation r  | 7  |
| 3.575239191 | 1.5048 | E9AYE0;F8SI | tr E9AYE0 E9AYE0_LEIMU Proline dehydrogenase OS    | 9  |
| 3.858878178 | 1.5044 | E9B1P5      | tr E9B1P5 E9B1P5_LEIMU Uncharacterized protein C   | 3  |
| 3.990613537 | 1.503  | E9AZX7      | tr E9AZX7 E9AZX7_LEIMU Putative hydrolase, alpha/  | 4  |
| 3.424946906 | 1.5021 | E9B473      | tr E9B473 E9B473_LEIMU Succinyl-CoA:3-ketoacid-c   | 10 |
| 3.60230895  | 1.5013 | E9AQZ4      | tr E9AQZ4 E9AQZ4_LEIMU Cystathionine beta-synth    | 5  |
| 3.980779241 | 1.5009 | E9AQ10      | tr E9AQ10 E9AQ10_LEIMU Putative ATP-dependent      | 5  |
| 3.160118317 | 1.4986 | E9B640      | tr E9B640 E9B640_LEIMU Uncharacterized protein C   | 2  |
| 4.425359396 | 1.4982 | E9B6N5      | tr E9B6N5 E9B6N5_LEIMU Uncharacterized protein C   | 2  |
| 3.272022366 | 1.4972 | E9AQL3      | tr E9AQL3 E9AQL3_LEIMU Putative orotidine-5-phos   | 3  |
| 3.617585699 | 1.496  | E9ATX3      | tr E9ATX3 E9ATX3_LEIMU Putative NADH dehydroge     | 11 |
| 3.174927524 | 1.4959 | E9B0D7      | tr E9B0D7 E9B0D7_LEIMU Alkyl dihydroxyacetoneph    | 12 |
| 3.695319238 | 1.4949 | E9AY02      | tr E9AY02 E9AY02_LEIMU Protein pelota homolog O    | 3  |
| 3.482571559 | 1.4938 | E9AQ41      | tr E9AQ41 E9AQ41_LEIMU Cytoplasmic l-asparagina    | 2  |
| 3.516375553 | 1.4938 | E9ATC6      | tr E9ATC6 E9ATC6_LEIMU 2-oxoglutarate dehydroge    | 21 |
| 3.98208099  | 1.4906 | E9AQW8      | tr E9AQW8 E9AQW8_LEIMU Uncharacterized protei      | 4  |
| 3.136261762 | 1.4906 | E9AT09      | tr E9AT09 E9AT09_LEIMU Glucokinase 1-like protein  | 2  |
| 3.200122002 | 1.4903 | E9AKR3      | tr E9AKR3 E9AKR3_LEIMU NAD(P)-dependent steroi     | 6  |
| 3.901315233 | 1.4873 | E9ANM7      | tr E9ANM7 E9ANM7_LEIMU Uncharacterized protei      | 4  |
| 4.044843798 | 1.4861 | E9B3Z8      | tr E9B3Z8 E9B3Z8_LEIMU Putative peptidase M20/M    | 7  |
| 3.882586768 | 1.4858 | E9AS04      | tr E9AS04 E9AS04_LEIMU Uncharacterized protein C   | 3  |
| 3.409392289 | 1.4851 | E9AQM8      | tr E9AQM8 E9AQM8_LEIMU Uncharacterized protei      | 4  |
| 3.675034083 | 1.4848 | E9B2B4      | tr E9B2B4 E9B2B4_LEIMU Uncharacterized protein C   | 2  |
| 3.66431041  | 1.4847 | E9AM00      | tr E9AM00 E9AM00_LEIMU Putative U-box domain p     | 6  |
| 3.735113649 | 1.4846 | E9B2K8      | tr E9B2K8 E9B2K8_LEIMU Uncharacterized protein C   | 6  |
| 3.266073604 | 1.484  | E9AQA0      | tr E9AQA0 E9AQA0_LEIMU NAD-specific glutamate c    | 41 |
| 3.719766804 | 1.4833 | E9AYX1      | tr E9AYX1 E9AYX1_LEIMU Uncharacterized protein C   | 3  |
| 3.434492864 | 1.4833 | E9ANP4      | tr E9ANP4 E9ANP4_LEIMU Pyruvate, phosphate dik     | 35 |
| 3.693050137 | 1.4826 | E9AQI0      | tr E9AQI0 E9AQI0_LEIMU Protein tyrosine phosphat   | 7  |

|             |        |             |                                                          |    |
|-------------|--------|-------------|----------------------------------------------------------|----|
| 4.215247963 | 1.4812 | E9ANI1      | tr E9ANI1 E9ANI1_LEIMU Putative 14-3-3 protein OS        | 7  |
| 3.416068582 | 1.4811 | E9AS74      | tr E9AS74 E9AS74_LEIMU Uncharacterized protein O         | 3  |
| 3.456516109 | 1.4803 | E9AVG1      | tr E9AVG1 E9AVG1_LEIMU Putative mitochondrial st         | 2  |
| 3.577785549 | 1.4802 | E9B5Q7      | tr E9B5Q7 E9B5Q7_LEIMU Uncharacterized protein (         | 5  |
| 3.938149917 | 1.4793 | Q95NJ3;E8N  | tr Q95NJ3 Q95NJ3_LEIAM Activated C kinase protein        | 11 |
| 3.983755167 | 1.479  | E9B604      | tr E9B604 E9B604_LEIMU Thioredoxin-like protein O        | 4  |
| 3.865722055 | 1.4777 | E9AW98      | tr E9AW98 E9AW98_LEIMU Na/H antiporter-like pro          | 5  |
| 3.403942819 | 1.4762 | E9B2E0      | tr E9B2E0 E9B2E0_LEIMU Uncharacterized protein O         | 2  |
| 3.745872704 | 1.476  | E9AZV7      | tr E9AZV7 E9AZV7_LEIMU Haloacid dehalogenase-lik         | 2  |
| 3.42952895  | 1.4757 | E9AKQ4      | tr E9AKQ4 E9AKQ4_LEIMU Putative 5-3 exonuclease          | 4  |
| 4.004922533 | 1.4754 | E9ARU9      | tr E9ARU9 E9ARU9_LEIMU Uncharacterized protein (         | 2  |
| 4.640743964 | 1.4723 | E9B2K9      | tr E9B2K9 E9B2K9_LEIMU Uncharacterized protein C         | 2  |
| 3.861641273 | 1.4721 | E9AKY6      | tr E9AKY6 E9AKY6_LEIMU Putative deoxyribose-pho          | 2  |
| 3.207359686 | 1.4716 | E9B1K4      | tr E9B1K4 E9B1K4_LEIMU Putative ATP-binding cass         | 7  |
| 3.721099967 | 1.4713 | E9ALS6      | tr E9ALS6 E9ALS6_LEIMU Uncharacterized protein O         | 12 |
| 3.577393187 | 1.4704 | E9AR57      | tr E9AR57 E9AR57_LEIMU Uncharacterized protein C         | 5  |
| 3.592918094 | 1.4695 | E9AXU4      | tr E9AXU4 E9AXU4_LEIMU Uncharacterized protein (         | 4  |
| 3.8207985   | 1.4677 | E9B6F9      | tr E9B6F9 E9B6F9_LEIMU Uncharacterized protein O         | 2  |
| 3.112309866 | 1.4675 | E9AWV7      | tr E9AWV7 E9AWV7_LEIMU Mitochondrial DNA-dire            | 2  |
| 3.545602543 | 1.4651 | E9ARK6;E9A  | tr E9ARK6 E9ARK6_LEIMU Citrate synthase OS=Leish         | 13 |
| 4.087696314 | 1.4643 | E9AK93      | tr E9AK93 E9AK93_LEIMU Uncharacterized protein C         | 2  |
| 3.012701553 | 1.4594 | E9AZA6      | tr E9AZA6 E9AZA6_LEIMU D-lactate dehydrogenase-          | 8  |
| 2.868468388 | 1.4579 | E9AQP9      | tr E9AQP9 E9AQP9_LEIMU Uncharacterized protein (         | 2  |
| 4.98478661  | 1.4578 | E9ANR0      | tr E9ANR0 E9ANR0_LEIMU Putative S-phase kinase- $\alpha$ | 3  |
| 3.652466614 | 1.457  | E9ASS2      | tr E9ASS2 E9ASS2_LEIMU Uncharacterized protein O         | 6  |
| 3.410329023 | 1.4561 | E9AYD4      | tr E9AYD4 E9AYD4_LEIMU Trifunctional enzyme alph         | 21 |
| 3.921960893 | 1.4561 | E9B0I3      | tr E9B0I3 E9B0I3_LEIMU Uncharacterized protein OS        | 6  |
| 3.290979498 | 1.4501 | E9ARY5      | tr E9ARY5 E9ARY5_LEIMU Uncharacterized protein C         | 3  |
| 3.508063666 | 1.4461 | E9AP70      | tr E9AP70 E9AP70_LEIMU Uncharacterized protein C         | 6  |
| 4.010903794 | 1.444  | E9AK51      | tr E9AK51 E9AK51_LEIMU Putative ubiquitin-conjug         | 3  |
| 3.851058467 | 1.444  | E8NHHK0;E9A | tr E8NHHK0 E8NHHK0_LEIMU WGS CADB00000000 dat            | 3  |
| 3.659932795 | 1.4435 | E9AVH2      | tr E9AVH2 E9AVH2_LEIMU Centromere/microtubule            | 9  |
| 3.615236818 | 1.4424 | E9AVJ3      | tr E9AVJ3 E9AVJ3_LEIMU Putative heat shock protei        | 6  |
| 3.26497173  | 1.442  | E9AK11      | tr E9AK11 E9AK11_LEIMU Uncharacterized protein C         | 2  |
| 3.363181447 | 1.4417 | E9B4K3      | tr E9B4K3 E9B4K3_LEIMU Eukaryotic translation initi      | 6  |
| 2.771249525 | 1.4417 | E9AJN2      | tr E9AJN2 E9AJN2_LEIMU Uncharacterized protein O         | 2  |
| 4.219059215 | 1.4412 | E9B0K7      | tr E9B0K7 E9B0K7_LEIMU Putative rac serine-threon        | 3  |
| 3.424603459 | 1.4384 | E9B2K6      | tr E9B2K6 E9B2K6_LEIMU Cyclin OS=Leishmania mex          | 2  |
| 3.910851847 | 1.4364 | E9B4M4      | tr E9B4M4 E9B4M4_LEIMU Putative cysteine-leucine         | 2  |
| 3.424824815 | 1.4361 | E9APZ2      | tr E9APZ2 E9APZ2_LEIMU Uncharacterized protein C         | 15 |
| 3.480484726 | 1.4358 | E9ANY1;P42  | tr E9ANY1 E9ANY1_LEIMU Glucose-6-phosphate isor          | 10 |
| 3.933604508 | 1.4314 | E9AR17      | tr E9AR17 E9AR17_LEIMU Uncharacterized protein C         | 2  |
| 3.606848818 | 1.4307 | E9ANF6      | tr E9ANF6 E9ANF6_LEIMU Putative seryl-tRNA synth         | 11 |
| 3.134557764 | 1.4287 | E9B073      | tr E9B073 E9B073_LEIMU Putative acyl-CoA dehydro         | 15 |
| 3.25482459  | 1.428  | E9AUF4      | tr E9AUF4 E9AUF4_LEIMU Uncharacterized protein (         | 2  |
| 3.714546426 | 1.4277 | E9ARI8      | tr E9ARI8 E9ARI8_LEIMU Aconitate hydratase OS=Le         | 22 |
| 3.50208669  | 1.4258 | E9B297      | tr E9B297 E9B297_LEIMU Putative acetyl-CoA carbo         | 51 |
| 3.965285514 | 1.4243 | E9AUR8      | tr E9AUR8 E9AUR8_LEIMU Putative calpain-like cyst        | 3  |
| 3.013618801 | 1.4236 | E9AX62      | tr E9AX62 E9AX62_LEIMU Uncharacterized protein C         | 5  |
| 3.784893137 | 1.4234 | E9APU2      | tr E9APU2 E9APU2_LEIMU Uncharacterized protein (         | 2  |

|             |        |            |                        |                               |    |
|-------------|--------|------------|------------------------|-------------------------------|----|
| 4.280153914 | 1.4223 | E9AKF1     | tr E9AKF1 E9AKF1_LEIMU | Uncharacterized protein C     | 7  |
| 3.929366551 | 1.4222 | Q4TZP6;E9A | tr Q4TZP6 Q4TZP6_LEIME | Glutamine synthetase OS=      | 7  |
| 3.830447488 | 1.4206 | E9ARD9     | tr E9ARD9 E9ARD9_LEIMU | Diphosphomevalonate de        | 5  |
| 3.632704279 | 1.4185 | E9AQQ4;A0  | tr E9AQQ4 E9AQQ4_LEIMU | Sucrose-phosphate syntl       | 8  |
| 3.278575223 | 1.4176 | E9AXP3     | tr E9AXP3 E9AXP3_LEIMU | Uncharacterized protein C     | 2  |
| 3.562818695 | 1.4166 | E9B1L5     | tr E9B1L5 E9B1L5_LEIMU | Uncharacterized protein O     | 5  |
| 3.287136235 | 1.4111 | E9AZ53     | tr E9AZ53 E9AZ53_LEIMU | Uncharacterized protein C     | 2  |
| 3.88996697  | 1.4105 | E9AJY2;A0A | tr E9AJY2 E9AJY2_LEIMU | Elongation initiation factor  | 13 |
| 4.078139528 | 1.407  | E9B400     | tr E9B400 E9B400_LEIMU | Peptidyl-prolyl cis-trans isc | 7  |
| 3.205191977 | 1.4041 | E9B5Z7;E9B | tr E9B5Z7 E9B5Z7_LEIMU | Putative NADH-dependent       | 25 |
| 2.743804551 | 1.4029 | E9AU14     | tr E9AU14 E9AU14_LEIMU | Uncharacterized protein C     | 2  |
| 3.041110666 | 1.4021 | E9ATF1     | tr E9ATF1 E9ATF1_LEIMU | Uncharacterized protein O     | 3  |
| 3.315835302 | 1.402  | E9AT73     | tr E9AT73 E9AT73_LEIMU | Succinate--CoA ligase [ADP    | 20 |
| 3.373413644 | 1.397  | E9B4S7     | tr E9B4S7 E9B4S7_LEIMU | Uncharacterized protein O     | 2  |
| 4.008882503 | 1.3969 | E9B715     | tr E9B715 E9B715_LEIMU | Uncharacterized protein C     | 2  |
| 2.742448565 | 1.3867 | E9AMM4     | tr E9AMM4 E9AMM4_LEIMU | DNA helicase OS=Leish         | 2  |
| 3.560035529 | 1.3859 | E9AMK2     | tr E9AMK2 E9AMK2_LEIMU | Uncharacterized protein       | 2  |
| 3.585995979 | 1.3848 | E9B5N5     | tr E9B5N5 E9B5N5_LEIMU | Uncharacterized protein C     | 2  |
| 3.979372698 | 1.377  | E9AYG6     | tr E9AYG6 E9AYG6_LEIMU | Uncharacterized protein C     | 3  |
| 3.896440723 | 1.3764 | E9B180     | tr E9B180 E9B180_LEIMU | Putative kinesin OS=Leishr    | 5  |
| 3.163378773 | 1.3761 | E9B4G7     | tr E9B4G7 E9B4G7_LEIMU | Uncharacterized protein C     | 8  |
| 3.663585982 | 1.3759 | E9B4N0     | tr E9B4N0 E9B4N0_LEIMU | Putative enoyl-[acyl-carrie   | 2  |
| 3.065443761 | 1.3755 | E9AM50     | tr E9AM50 E9AM50_LEIMU | Uncharacterized protein       | 6  |
| 3.397552236 | 1.3714 | E9B1F3     | tr E9B1F3 E9B1F3_LEIMU | Peptidyl-prolyl cis-trans isc | 4  |
| 3.240112263 | 1.3704 | E9AXN7     | tr E9AXN7 E9AXN7_LEIMU | Uncharacterized protein C     | 2  |
| 3.127707078 | 1.3652 | E9AQG7     | tr E9AQG7 E9AQG7_LEIMU | Uncharacterized protein       | 11 |
| 3.241993554 | 1.3616 | E9AZR1     | tr E9AZR1 E9AZR1_LEIMU | Uncharacterized protein C     | 2  |
| 3.329756516 | 1.3611 | E9AYH4     | tr E9AYH4 E9AYH4_LEIMU | Uncharacterized protein C     | 4  |
| 3.660312624 | 1.3609 | E9AP96     | tr E9AP96 E9AP96_LEIMU | Oxidoreductase-like prote     | 3  |
| 3.696090444 | 1.3601 | E9AV32     | tr E9AV32 E9AV32_LEIMU | Cytosolic Fe-S cluster asse   | 2  |
| 2.881652098 | 1.3599 | E9ASP6;Q9L | tr E9ASP6 E9ASP6_LEIMU | Fructose-bisphosphate ald     | 22 |
| 3.163844788 | 1.3588 | E9B386     | tr E9B386 E9B386_LEIMU | Putative chaperone protei     | 2  |
| 3.26015715  | 1.3586 | E9AZ51     | tr E9AZ51 E9AZ51_LEIMU | Proteasome regulatory no      | 4  |
| 3.520993639 | 1.3564 | E9ATG3;E9A | tr E9ATG3 E9ATG3_LEIMU | Aminomethyltransferase        | 2  |
| 3.974771759 | 1.3545 | E9ARP6     | tr E9ARP6 E9ARP6_LEIMU | Phosphodiesterase OS=Le       | 3  |
| 3.359599945 | 1.349  | E9B193     | tr E9B193 E9B193_LEIMU | 3-hydroxy-3-methylglutary     | 10 |
| 4.268600668 | 1.3468 | E9AY25     | tr E9AY25 E9AY25_LEIMU | Cytosolic Fe-S cluster asse   | 2  |
| 3.348636895 | 1.3452 | E9AQT2     | tr E9AQT2 E9AQT2_LEIMU | Uncharacterized protein C     | 3  |
| 3.144492062 | 1.3433 | E9B1B3     | tr E9B1B3 E9B1B3_LEIMU | Phosphoglycerate kinase C     | 10 |
| 3.507160986 | 1.3386 | E9B759     | tr E9B759 E9B759_LEIMU | Putative isomerase (Isoper    | 8  |
| 3.388654814 | 1.3336 | E9AT13     | tr E9AT13 E9AT13_LEIMU | Putative tyrosine aminotra    | 14 |
| 2.859654197 | 1.3334 | E9B301     | tr E9B301 E9B301_LEIMU | Small nuclear ribonucleop     | 4  |
| 2.966950132 | 1.3269 | E9AVT6     | tr E9AVT6 E9AVT6_LEIMU | Uncharacterized protein C     | 2  |
| 3.49545571  | 1.323  | E9AZZ7     | tr E9AZZ7 E9AZZ7_LEIMU | DNA topoisomerase OS=Le       | 4  |
| 3.311302566 | 1.3117 | E9AQY9     | tr E9AQY9 E9AQY9_LEIMU | Putative peptidase t (Pep     | 9  |
| 3.830822536 | 1.3097 | E9ARZ9     | tr E9ARZ9 E9ARZ9_LEIMU | Uncharacterized protein C     | 2  |
| 3.42113135  | 1.3023 | E9AN37     | tr E9AN37 E9AN37_LEIMU | Uncharacterized protein C     | 2  |
| 3.824458691 | 1.2957 | E9AQ78     | tr E9AQ78 E9AQ78_LEIMU | Peroxisomal membrane p        | 3  |
| 4.617429674 | 1.2857 | E9AKT5     | tr E9AKT5 E9AKT5_LEIMU | Putative deoxyuridine trip    | 2  |
| 3.303958836 | 1.2732 | E9B098     | tr E9B098 E9B098_LEIMU | Spindle pole body compor      | 2  |

|             |        |            |                        |                            |   |
|-------------|--------|------------|------------------------|----------------------------|---|
| 3.978334008 | 1.2407 | E9AXC4     | tr E9AXC4 E9AXC4_LEIMU | Uncharacterized protein C  | 2 |
| 3.157253749 | 1.2238 | E9AX09     | tr E9AX09 E9AX09_LEIMU | Fatty acyl-CoA reductase C | 6 |
| 2.784568807 | 1.2149 | E9B5X8;E9B | tr E9B5X8 E9B5X8_LEIMU | Aldose 1-epimerase-like p  | 7 |
| 3.417184321 | 1.2137 | E9ALD2     | tr E9ALD2 E9ALD2_LEIMU | Uncharacterized protein C  | 2 |
| 3.504702608 | 1.2135 | E8NHQ8     | tr E8NHQ8 E8NHQ8_LEIMU | 3-hydroxyisobutyryl-CoA    | 2 |
| 2.761628483 | 1.2091 | E9B4G6     | tr E9B4G6 E9B4G6_LEIMU | Putative fatty acid desatu | 4 |
| 3.118466664 | 1.2046 | E9B2H5     | tr E9B2H5 E9B2H5_LEIMU | Profilin OS=Leishmania m   | 6 |
| 2.645412147 | 1.1791 | E9AQA1     | tr E9AQA1 E9AQA1_LEIMU | Putative farnesyl synthet  | 2 |
| 2.124658496 | 1.0951 | E9B299     | tr E9B299 E9B299_LEIMU | Uncharacterized protein C  | 2 |
| 3.441679525 | 1.0491 | E9B765     | tr E9B765 E9B765_LEIMU | Uncharacterized protein C  | 4 |
| 2.950866495 | 1.0321 | E9AL30     | tr E9AL30 E9AL30_LEIMU | CDP-diacylglycerol--glycer | 2 |
| 2.915697821 | 1.0038 | E9AVX8     | tr E9AVX8 E9AVX8_LEIMU | I/6 autoantigen-like prote | 6 |
| 3.113271395 | 0.9826 | E9AMS8;A7  | tr E9AMS8 E9AMS8_LEIMU | Oligopeptidase b OS=Lei    | 2 |
| 2.614330862 | 0.8921 | E9AMS5     | tr E9AMS5 E9AMS5_LEIMU | Putative ubiquitin ligase  | 3 |



Table S3. *L. mexicana* poly(A) interactome.

| Gene ID      | Protein name                                                                      |
|--------------|-----------------------------------------------------------------------------------|
| LmxM.01.0050 | carboxylase, putative                                                             |
| LmxM.01.0410 | hypothetical protein                                                              |
| LmxM.01.0470 | fatty acyl CoA syntetase 1, putative                                              |
| LmxM.01.0480 | beta eliminating lyase, putative                                                  |
| LmxM.01.0490 | long-chain-fatty-acid-CoA ligase, putative                                        |
| LmxM.01.0520 | long-chain-fatty-acid-CoA ligase, putative                                        |
| LmxM.01.0540 | hypothetical protein, conserved                                                   |
| LmxM.01.0620 | Beat-regulation protein                                                           |
| LmxM.01.0770 | Eukaryotic initiation factor 4A-1                                                 |
| LmxM.02.0240 | glycosyltransferase (GlcNAc), putative                                            |
| LmxM.02.0310 | paraflagellar rod component, putative                                             |
| LmxM.02.0370 | proteasome regulatory non-ATPase subunit 6, putative                              |
| LmxM.02.0450 | voltage-dependent anion-selective channel, putative                               |
| LmxM.02.0460 | Mitochondrial outer membrane protein porin, putative                              |
| LmxM.02.0550 | hypothetical protein, unknown function                                            |
| LmxM.02.0670 | mitochondrial carrier protein, putative                                           |
| LmxM.02.0710 | serine peptidase, putative                                                        |
| LmxM.02.0740 | peptidyl dipeptidase, putative                                                    |
| LmxM.03.0030 | D-3-phosphoglycerate dehydrogenase-like protein                                   |
| LmxM.03.0040 | 2-aminoethylphosphonate:pyruvateaminotransferas e-like protein                    |
| LmxM.03.0230 | long chain fatty Acyl CoA synthetase, putative                                    |
| LmxM.03.0250 | ribosomal protein L38, putative                                                   |
| LmxM.03.0270 | FYVE zinc finger/Apolipoprotein A1/A4/E domain containing protein, putative       |
| LmxM.03.0430 | 60S acidic ribosomal protein P2, putative                                         |
| LmxM.03.0520 | hypothetical protein, conserved                                                   |
| LmxM.03.0540 | serine peptidase, Clan SJ, family S16, putative                                   |
| LmxM.03.0600 | arginine N-methyltransferase, putative                                            |
| LmxM.03.0630 | hypothetical protein, conserved                                                   |
| LmxM.03.0690 | DEAD/DEAH box helicase, putative                                                  |
| LmxM.03.0960 | hypothetical protein, conserved                                                   |
| LmxM.03.0970 | MORN repeat, putative                                                             |
| LmxM.03.0980 | eukaryotic translation initiation factor 2 subunit alpha                          |
| LmxM.04.0010 | organelle-type calcium ATPase                                                     |
| LmxM.04.0030 | cAMP-specific phosphodiesterase, putative                                         |
| LmxM.04.0050 | hypothetical protein, conserved                                                   |
| LmxM.04.0240 | GRAM domain containing protein, putative                                          |
| LmxM.04.0420 | Tetratricopeptide repeat, putative                                                |
| LmxM.04.0450 | cysteine peptidase, Clan CA, family C2, putative                                  |
| LmxM.04.0460 | adenylosuccinate lyase, putative                                                  |
| LmxM.04.0470 | 60S ribosomal protein L11 (L5, L16)                                               |
| LmxM.04.0550 | Intraflagellar transport protein 139, putative                                    |
| LmxM.04.0580 | spermidine synthase, putative                                                     |
| LmxM.04.0660 | hypothetical protein                                                              |
| LmxM.04.0670 | hypothetical protein, conserved                                                   |
| LmxM.04.0680 | ubiquitin-conjugating enzyme E2, putative                                         |
| LmxM.04.0750 | 60S ribosomal protein L10, putative                                               |
| LmxM.04.0810 | Pescadillo N-terminus/BRCA1 C Terminus (BRCT) domain containing protein, putative |
| LmxM.04.0940 | hypothetical protein                                                              |
| LmxM.04.0990 | hypothetical protein, conserved                                                   |
| LmxM.04.1050 | acyltransferase-like protein, copy 2                                              |
| LmxM.04.1160 | fructose-1,6-bisphosphatase, cytosolic, putative                                  |
| LmxM.04.1170 | Double RNA binding domain protein 3                                               |
| LmxM.05.0030 | small GTP-binding protein, putative                                               |

LmxM.05.0040 paraflagellar rod component par4, putative  
LmxM.05.0100 phosphoprotein phosphatase, putative  
LmxM.05.0140 nucleolar RNA helicase II, putative  
LmxM.05.0180 dihydrolipoamide branched chain transacylase, putative  
LmxM.05.0280 protein tyrosine phosphatase, putative  
LmxM.05.0350 trypanothione reductase  
LmxM.05.0460 GTPase, putative  
LmxM.05.0490 hypothetical protein, conserved  
LmxM.05.0500 ATP synthase F1, alpha subunit, putative  
LmxM.05.0780 hypothetical protein, conserved  
LmxM.05.0830 methylthioadenosine phosphorylase, putative  
LmxM.05.0890 CPSF A subunit region, putative  
LmxM.05.0960 metallo-peptidase, Clan M-, Family M49  
LmxM.05.0970 mercaptopyruvate sulfurtransferase  
LmxM.05.1040 stomatin-like protein  
LmxM.05.1080 Phosphatidylinositol 4-phosphate 5-kinase, putative  
LmxM.05.1100 methyltransferase domain containing protein, putative  
LmxM.05.1140 V-type proton ATPase subunit D, putative  
LmxM.05.1210 protein phosphatase type 1 regulator-like protein  
LmxM.06.0030 WD domain, G-beta repeat, putative  
LmxM.06.0120 cyclophilin  
LmxM.06.0140 proteasome beta 6 subunit, putative  
LmxM.06.0220 hypothetical protein, conserved  
LmxM.06.0260 5'-3' exoribonuclease A, putative  
LmxM.06.0350 NAD(P)-dependent steroid dehydrogenase protein, putative  
LmxM.06.0370 glutamine synthetase, putative  
LmxM.06.0410 60S ribosomal protein L19, putative  
LmxM.06.0570 60S ribosomal protein L23a, putative  
LmxM.06.0690 hypothetical protein, conserved  
LmxM.06.0730 threonine ammonia-lyase  
LmxM.06.0860 dihydrofolate reductase-thymidylate synthase  
LmxM.06.0880 acyl-coenzyme a dehydrogenase, putative  
LmxM.06.0950 glucosamine-fructose-6-phosphate aminotransferase, putative  
LmxM.06.1050 protein disulfide isomerase  
LmxM.06.1100 peripherally associated ATOM36  
LmxM.07.0060 cytochrome c1, heme protein, mitochondrial, putative  
LmxM.07.0190 protein phosphatase 2A, regulatory subunit B, putative  
LmxM.07.0220 hypothetical protein, conserved  
LmxM.07.0270 acetylnornithine deacetylase-like protein  
LmxM.07.0310 paraflagellar rod protein, putative  
LmxM.07.0340 ATP-dependent RNA helicase DBP2B, putative  
LmxM.07.0500 60S ribosomal protein L7a, putative  
LmxM.07.0570 Nucleolar protein 54, putative  
LmxM.07.0600 electron transfer flavoprotein-ubiquinone oxidoreductase, putative  
LmxM.07.0640 eukaryotic translation initiation factor 3 subunit h  
LmxM.07.0680 40S ribosomal protein S9, putative  
LmxM.07.0700 topoisomerase-related function protein-like protein  
LmxM.07.0800 flavoprotein subunit-like protein  
LmxM.07.0870 splicing factor ptsr1-like protein  
LmxM.07.0900 serine/threonine kinase, putative  
LmxM.07.0930 hypothetical protein, conserved  
LmxM.07.0990 nucleolar RNA-binding protein, putative  
LmxM.07.1000 RNA binding protein-like protein  
LmxM.07.1030 peptidyl-prolyl cis-trans isomerase/rotamase, putative  
LmxM.07.1050 cation-transporting ATPase, putative  
LmxM.08.0030 Qc-SNARE protein, putative

LmxM.08.0200 Inositol phosphosphingolipids phospholipase C  
LmxM.08.0290 iron superoxide dismutase A, mitochondrial  
LmxM.08.0320 mitochondrial associated ribonuclease, putative  
LmxM.08.0410 WD domain, G-beta repeat, putative  
LmxM.08.0420 hypothetical protein, conserved  
LmxM.08.0550 translation initiation factor-like protein  
LmxM.08.0890 mitochondrial DNA polymerase beta  
LmxM.08.0960 Dpy-30 motif containing protein, putative  
LmxM.08.1040b hypothetical protein  
LmxM.08.1040c hypothetical protein  
LmxM.08.1070 cathepsin L-like protease, putative  
LmxM.08.1070pa hypothetical protein  
LmxM.08.1100 hypothetical protein, conserved  
LmxM.08.1110 stress-induced protein sti1  
LmxM.08.1120 Repeat of unknown function (DUF1126), putative  
LmxM.08.1222 hypothetical protein, conserved  
LmxM.08\_29.002 transcription factor-like protein  
LmxM.08\_29.003 ribosomal protein L3-like protein  
LmxM.08\_29.006 tryptophanyl-tRNA synthetase, putative  
LmxM.08\_29.011 C2 domain in Dock180 and Zizimin proteins, putative  
LmxM.08\_29.012 proteasome regulatory non-ATPase subunit, putative  
LmxM.08\_29.015 Putative intraflagellar transport protein B2  
LmxM.08\_29.027 hypothetical protein  
LmxM.08\_29.028 hypothetical protein  
LmxM.08\_29.032 TPR repeat, putative  
LmxM.08\_29.035 hypothetical protein, conserved  
LmxM.08\_29.051 cofilin-like protein  
LmxM.08\_29.062 ABC transporter, putative  
LmxM.08\_29.066 flagellar radial spoke protein-like, putative  
LmxM.08\_29.068 Triple RNA binding domain protein 3  
LmxM.08\_29.076 heat shock protein 90, putative  
LmxM.08\_29.078 U-box domain protein, putative  
LmxM.08\_29.085 High mobility group protein TDP1  
LmxM.08\_29.086 guanine deaminase, putative  
LmxM.08\_29.087 hypothetical protein, conserved  
LmxM.08\_29.088 ADP-ribosylation factor-like protein 3A, putative  
LmxM.08\_29.092 LETM1 and EF-hand domain-containing protein 1, putative  
LmxM.08\_29.094 hypothetical protein, conserved  
LmxM.08\_29.100 hypothetical protein, conserved  
LmxM.08\_29.107 ribosomal protein L1a, putative  
LmxM.08\_29.110 Ankyrin repeats (3 copies), putative  
LmxM.08\_29.115 tryparedoxin 2, putative  
LmxM.08\_29.116 tryparedoxin 1, putative  
LmxM.08\_29.117 hypothetical protein, conserved  
LmxM.08\_29.124 Hsp70 protein/TPR repeat, putative  
LmxM.08\_29.127 serine peptidase, putative  
LmxM.08\_29.131 carnitine/choline acetyltransferase, putative  
LmxM.08\_29.138 hypothetical protein, conserved  
LmxM.08\_29.147 hypothetical protein, conserved  
LmxM.08\_29.150 Nodulin-like, putative  
LmxM.08\_29.160 endomembrane protein 70, putative  
LmxM.08\_29.172 histone H2A, putative  
LmxM.08\_29.175 paraflagellar rod protein 1D, putative  
LmxM.08\_29.180 40S ribosomal protein S15A, putative  
LmxM.08\_29.183 dihydrolipoamide dehydrogenase, putative  
LmxM.08\_29.196 fumarate hydratase, putative

LmxM.08\_29.209| AAA domain containing protein, putative  
LmxM.08\_29.210| Present in the outer mitochondrial membrane proteome 37  
LmxM.08\_29.211| UDP-glucose:glycoprotein glucosyltransferase, putative  
LmxM.08\_29.216| rab-GDP dissociation inhibitor, putative  
LmxM.08\_29.220| dynamin-1-like protein  
LmxM.08\_29.224| Aminopeptidase M1, putative  
LmxM.08\_29.231| enoyl-CoA hydratase/isomerase-like protein  
LmxM.08\_29.234| nucleosome assembly protein (NAP), putative  
LmxM.08\_29.244| 3'5'-cyclic nucleotide phosphodiesterase, putative  
LmxM.08\_29.246| 60S ribosomal protein L13, putative  
LmxM.08\_29.250| vacuolar protein sorting-associated protein 4  
LmxM.08\_29.251| ATP-dependent 6-phosphofructokinase, glycosomal  
LmxM.08\_29.257| serine/threonine-protein kinase, putative  
LmxM.08\_29.263| Present in the outer mitochondrial membrane proteome 24  
LmxM.08\_29.280| inosine-adenosine-guanosine-nucleosidehydrolase, putative  
LmxM.08\_29.283| RNA recognition motif. (a.k.a. RRM, RBD, or RNP domain), putative  
LmxM.08\_29.286| 40S ribosomal protein S19-like protein  
LmxM.09.0010| hypothetical protein, conserved  
LmxM.09.0100| flagellar pocket cytoskeletal protein bilbo1  
LmxM.09.0220| hypothetical protein, conserved  
LmxM.09.0230| ATP-dependent protease ATPase subunit HslU2  
LmxM.09.0520| Flagellum attachment zone protein 3  
LmxM.09.0740| ubiquitin ligase, putative  
LmxM.09.0770| oligopeptidase b  
LmxM.09.0891| polyubiquitin, putative  
LmxM.09.0910| calmodulin, putative  
LmxM.09.0940| hypothetical protein, conserved  
LmxM.09.0970| elongation factor-1 gamma  
LmxM.09.1010| Present in the outer mitochondrial membrane proteome 10  
LmxM.09.1050| MSP (Major sperm protein) domain containing protein, putative  
LmxM.09.1070| eukaryotic translation initiation factor 2 subunit, putative  
LmxM.09.1120| mitochondrial RNA binding protein 2  
LmxM.09.1320| paraflagellar rod component, putative  
LmxM.09.1490| cytochrome b5-like protein, putative  
LmxM.09.1510| hypothetical protein, conserved  
LmxM.10.0070| ribosomal protein l35a, putative  
LmxM.10.0130| hypothetical protein, conserved  
LmxM.10.0180| leucine-rich repeat protein, putative  
LmxM.10.0200| Mitogen-activated protein kinase 10, putative  
LmxM.10.0210| nucleolar protein 56, putative  
LmxM.10.0219| hypothetical protein, unknown function  
LmxM.10.0290| isocitrate dehydrogenase [NADP]  
LmxM.10.0390| GP63, leishmanolysin  
LmxM.10.0420| dihydroxyacetone kinase 1-like protein  
LmxM.10.0470| GP63, leishmanolysin  
LmxM.10.0490| mitogen-activated protein kinase  
LmxM.10.0510| glycerol-3-phosphate dehydrogenase [NAD+], glycosomal/mitochondrial  
LmxM.10.0780| WD domain, G-beta repeat, putative  
LmxM.10.0850| nuclear transport factor 2, putative  
LmxM.10.0870| histone H3  
LmxM.10.0890| FKBP-type peptidyl-prolyl cis-trans isomerase, putative  
LmxM.10.0910| small GTP-binding protein Rab11, putative  
LmxM.10.1030| RNA-binding protein-like protein  
LmxM.10.1080| Eukaryotic translation initiation factor 4 gamma 5  
LmxM.10.1110| PAB1-binding protein , putative  
LmxM.10.1150| Cilia- and flagella-associated protein 45, putative

LmxM.10.1160 Ras-related protein RabX1, putative  
LmxM.10.1190 flagellar protofilament ribbon protein-like protein  
LmxM.10.1240 Beta-1,2 mannosyltransferase  
LmxM.11.0070 GRIP domain containing protein, putative  
LmxM.11.0100 seryl-tRNA synthetase  
LmxM.11.0180 hypothetical protein, conserved  
LmxM.11.0210 acidocalcisomal pyrophosphatase  
LmxM.11.0240 proteasome alpha 7 subunit, putative  
LmxM.11.0350 14-3-3 protein 2, putative  
LmxM.11.0400 tubulin-tyrsoine ligase-like protein  
LmxM.11.0470 pumilio-repeat, RNA-binding protein, putative  
LmxM.11.0480 mRNA cap guanine-N7 methyltransferase, putative  
LmxM.11.0490 tetratricopeptide repeat (TPR) protein  
LmxM.11.0560 transcription modulator/accessory protein, putative  
LmxM.11.0590 3-methylcrotonoyl-CoA carboxylase beta subunit, putative  
LmxM.11.0620 metallo-peptidase, Clan MF, Family M17  
LmxM.11.0630 metallo-peptidase, Clan MF, Family M17  
LmxM.11.0810 hypothetical protein, conserved  
LmxM.11.0820 hypothetical protein, conserved  
LmxM.11.0830 hypothetical protein, conserved  
LmxM.11.0870 kinesin, putative  
LmxM.11.0880 START domain containing protein, putative  
LmxM.11.0890 hypothetical protein, conserved  
LmxM.11.0960 40S ribosomal protein S5  
LmxM.11.1000 pyruvate phosphate dikinase, putative  
LmxM.11.1030 hypothetical protein, conserved  
LmxM.11.1100 Lanosterol 14-alpha demethylase  
LmxM.11.1130 60S ribosomal protein L28, putative  
LmxM.11.1160 protein transport protein SEC31, putative  
LmxM.11.1170 eukaryotic release factor 3, putative  
LmxM.11.1360 ribosomal protein L4/L1 family, putative  
LmxM.12.0030 proteasome beta-1 subunit, putative  
LmxM.12.0040 Mitochondrial SSU ribosomal protein 29, putative  
LmxM.12.0210 proteasome regulatory ATPase subunitcc118.3, putative  
LmxM.12.0250 cysteinyl-tRNA synthetase, putative  
LmxM.12.0350 CCR4-NOT transcription complex subunit 2, putative  
LmxM.12.0390 hypothetical protein, conserved  
LmxM.12.0410 Eukaryotic protein of unknown function (DUF866), putative  
LmxM.12.0450 hypothetical protein, unknown function  
LmxM.12.0530 glucose-6-phosphate isomerase  
LmxM.12.0630 alanine aminotransferase, putative  
LmxM.12.0660 ser/thr protein phosphatase, putative  
LmxM.12.0670 cytochrome oxidase subunit IV, putative  
LmxM.12.1120 Flagellum attachment zone protein 2  
LmxM.12.1130 NADH:flavin oxidoreductase/NADH oxidase, putative  
LmxM.12.1270 arginine N-methyltransferase-like protein  
LmxM.13.0090 metallo-peptidase, Clan MA(E) Family M32  
LmxM.13.0160 protein kinase A regulatory subunit  
LmxM.13.0280 alpha tubulin  
LmxM.13.0300 alpha tubulin, putative, (fragment)  
LmxM.13.0430 Flagellar radial spoke protein 4/6  
LmxM.13.0450 ALBA-domain protein 1  
LmxM.13.0460 hypothetical protein, conserved  
LmxM.13.0500 ATP-dependent RNA helicase, putative  
LmxM.13.0560 60S ribosomal protein L18, putative  
LmxM.13.0570 40S ribosomal protein S12, putative

LmxM.13.0670 mannose-specific lectin, putative  
LmxM.13.0680 Metallopeptidase family M24, putative  
LmxM.13.0780 protein kinase, putative  
LmxM.13.0870 mitochondrial processing peptidase alpha subunit, putative  
LmxM.13.0880 hypothetical protein, conserved  
LmxM.13.1050 Dpy-30 motif containing protein, putative  
LmxM.13.1060 NADH-cytochrome b5 reductase, putative  
LmxM.13.1090 proteasome regulatory ATPase subunit 2, putative  
LmxM.13.1100 leucyl-tRNA synthetase, putative  
LmxM.13.1190 adenylosuccinate synthetase, putative  
LmxM.13.1220 40S ribosomal protein S4, putative  
LmxM.13.1350 AAA domain/Dpy-30 motif containing protein, putative  
LmxM.13.1360 hypothetical protein, conserved  
LmxM.13.1480 Ran-binding protein 1, putative  
LmxM.13.1580 ubiquitin-conjugating enzyme, putative  
LmxM.13.1610 Kinesin-13 5, putative  
LmxM.13.1650 dynein heavy chain, putative  
LmxM.13.1660 chaperonin TCP20, putative  
LmxM.14.0100 hypothetical protein, conserved  
LmxM.14.0130 nucleoside hydrolase-like protein  
LmxM.14.0190 Thioredoxin-like, putative  
LmxM.14.0260 von Willebrand factor type A domain containing protein, putative  
LmxM.14.0310 proteasome alpha 3 subunit, putative  
LmxM.14.0450 N-terminal conserved domain of Nudc./CS domain containing protein, putative  
LmxM.14.0660 fatty acid elongase, putative  
LmxM.14.0705 fatty acid elongase, putative  
LmxM.14.0750 hypothetical protein, conserved  
LmxM.14.0800 hypothetical protein, conserved  
LmxM.14.0850 small myristoylated protein-3, putative  
LmxM.14.0930 tc40 antigen-like  
LmxM.14.0990 ADP/ATP mitochondrial carrier-like protein  
LmxM.14.1100 kinesin K39, putative  
LmxM.14.1140 hypothetical protein, conserved  
LmxM.14.1160 enolase  
LmxM.14.1210 NLI interacting factor-like phosphatase, putative  
LmxM.14.1220 hypothetical protein, conserved  
LmxM.14.1270 ubiquitin/ribosomal protein S27a, putative  
LmxM.14.1320 serine hydroxymethyltransferase, putative  
LmxM.14.1360 myo-inositol-1-phosphate synthase  
LmxM.14.1370 tyrosyl-tRNA synthetase, putative  
LmxM.14.1440 cytoskeleton associated protein, putative  
LmxM.15.0040 Possible lysine decarboxylase, putative  
LmxM.15.0050 cytochrome-b5 reductase, putative  
LmxM.15.0090 ATP-dependent protease ATPase subunit HslU1, putative  
LmxM.15.0130 ATP-dependent RNA helicase, putative  
LmxM.15.0170 protein phosphatase 2C, putative  
LmxM.15.0200 60S ribosomal protein L13a, putative  
LmxM.15.0230 lysyl-tRNA synthetase, putative  
LmxM.15.0240 sterol carrier protein, putative  
LmxM.15.0270 replication Factor A 28 kDa subunit, putative  
LmxM.15.0275 ribonucleoprotein p18, mitochondrial precursor, putative  
LmxM.15.0440b hypothetical protein  
LmxM.15.0540 Distal docking complex protein 1  
LmxM.15.0770 protein kinase, putative  
LmxM.15.0950 40S ribosomal protein S3, putative  
LmxM.15.0990 succinate dehydrogenase, putative

LmxM.15.1000 60S ribosomal protein L6, putative  
LmxM.15.1010 glutamate dehydrogenase  
LmxM.15.1040 tryparedoxin peroxidase  
LmxM.15.1160 tryparedoxin peroxidase  
LmxM.15.1203 60S acidic ribosomal protein P2  
LmxM.15.1320 Eukaryotic translation initiation factor 4 gamma 2  
LmxM.15.1330 actin-like protein, putative  
LmxM.15.1380 nucleolar RNA binding protein, putative  
LmxM.15.1440 glutaminyl-tRNA synthetase, putative  
LmxM.15.1450 proliferative cell nuclear antigen (PCNA), putative  
LmxM.15.1470 ribosomal protein S6, putative  
LmxM.15.1481 cAMP specific phosphodiesterase, putative  
LmxM.16.0110 Phosphotransferase enzyme family, putative  
LmxM.16.0140 eukaryotic translation initiation factor 1A, putative  
LmxM.16.0230 protein tyrosine phosphatase-like protein  
LmxM.16.0260 Ankyrin repeats (many copies)/Alpha/beta hydrolase family, putative  
LmxM.16.0460 60S ribosomal protein L21, putative  
LmxM.16.0520 hypothetical protein, conserved  
LmxM.16.0530 dihydroorotate dehydrogenase, putative  
LmxM.16.0540 aspartate carbamoyltransferase, putative  
LmxM.16.0550 orotidine-5-phosphate decarboxylase/orotate phosphoribosyltransferase, putative  
LmxM.16.0570 histone H3  
LmxM.16.0590 carbamoyl-phosphate synthase, putative  
LmxM.16.0690 eukaryotic translation initiation factor eIF2A, putative  
LmxM.16.0760 transaldolase, putative  
LmxM.16.0890 Nucleolar protein, Nop52, putative  
LmxM.16.0900 hypothetical protein, conserved  
LmxM.16.0950 sucrose-phosphate synthase-like protein  
LmxM.16.1005 Protein of unknown function (DUF3184), putative  
LmxM.16.1020 Protein of unknown function (DUF3184), putative  
LmxM.16.1130 tyrosyl or methionyl-tRNA synthetase-like protein  
LmxM.16.1180 delta-coat protein, putative  
LmxM.16.1310 cytochrome c, putative  
LmxM.16.1420 hypothetical protein, conserved  
LmxM.16.1530 endoplasmic reticulum oxidoreductin, putative  
LmxM.16.1600 eukaryotic translation initiation factor 4 gamma 3  
LmxM.16.1610 prohibitin, putative  
LmxM.16.1660 Flagellar Member 3  
LmxM.17.0010 eukaryotic translation initiation factor 3 subunit a  
LmxM.17.0080 elongation factor 1-alpha  
LmxM.17.0085 elongation factor 1-alpha  
LmxM.17.0120 hypothetical protein, conserved  
LmxM.17.0140 peptidase t, putative  
LmxM.17.0250 cystathionine beta-synthase  
LmxM.17.0410 hypothetical protein, conserved  
LmxM.17.0470 hypothetical protein, conserved  
LmxM.17.0480 Phenazine biosynthesis-like protein, putative  
LmxM.17.0550 RNA-binding protein, putative  
LmxM.17.0600 P-type ATPase, putative  
LmxM.17.0725 GMP reductase  
LmxM.17.0735 lysine decarboxylase-like protein  
LmxM.17.0800 OSM3-like kinesin, putative  
LmxM.17.0870 hypothetical protein, conserved  
LmxM.17.0910 acyltransferase, putative  
LmxM.17.0980 Mak10 subunit, NatC N(alpha)-terminal acetyltransferase, putative  
LmxM.17.1050 hydrolase-like protein

LmxM.17.1220 histone H2B  
LmxM.17.1290 eukaryotic translation initiation factor 3 subunit b  
LmxM.17.1400 otubain cysteine peptidase, Clan CA, family C65, putative  
LmxM.18.0010 kinetoplast polyadenylation/uridylation factor 1  
LmxM.18.0020 diphosphomevalonate decarboxylase, putative  
LmxM.18.0150 serine/threonine protein phosphatase type 5, putative  
LmxM.18.0210 Activator of Hsp90 ATPase, N-terminal/Activator of Hsp90 ATPase homolog 1-like protein, putative  
LmxM.18.0220 RNA-binding protein 29, putative  
LmxM.18.0270 protein kinase, putative  
LmxM.18.0280 hypothetical protein, conserved  
LmxM.18.0300 hypothetical protein, conserved  
LmxM.18.0510 aconitase, putative  
LmxM.18.0530 tubulin cofactor C domain-containing protein RP2, putative  
LmxM.18.0560 vacuolar ATP synthase subunit c, putative  
LmxM.18.0590 RNA binding protein, putative  
LmxM.18.0620 60S ribosomal protein L10a, putative  
LmxM.18.0670 citrate synthase, putative  
LmxM.18.0680 citrate synthase, putative  
LmxM.18.0700 HEAT repeats, putative  
LmxM.18.0740 Elongation factor Tu, mitochondrial, putative  
LmxM.18.0820 hypothetical protein, conserved  
LmxM.18.0990 UTP-glucose-1-phosphate uridylyltransferase 2, putative  
LmxM.18.1080 protein kinase A catalytic subunit 3  
LmxM.18.1090 phosphodiesterase, putative  
LmxM.18.1130 Ras-related protein Rab5A, putative  
LmxM.18.1210 prolyl-tRNA synthetase, putative  
LmxM.18.1290 mitochondrial carrier protein, putative  
LmxM.18.1300 mitochondrial carrier protein, putative  
LmxM.18.1370 heat shock protein, putative  
LmxM.18.1380 pyruvate dehydrogenase E1 component alpha subunit, putative  
LmxM.18.1400 60S ribosomal protein L34, putative  
LmxM.18.1420 pumilio protein, putative  
LmxM.18.1520 P-type H<sup>+</sup>-ATPase, putative  
LmxM.18.1640 hypothetical protein, conserved  
LmxM.18.1660 gamma-glutamylcysteine synthetase, putative  
LmxM.19.0020 hypothetical protein, conserved  
LmxM.19.0030 histone H2B  
LmxM.19.0060 40S ribosomal protein S2  
LmxM.19.0090 hypothetical protein, conserved  
LmxM.19.0100 fibrillarlin, putative  
LmxM.19.0140 Associated kinase of Tb14-3-3, putative  
LmxM.19.0150 mitogen-activated protein kinase kinase kinase, putative  
LmxM.19.0160 metallo-peptidase, Clan MG, Family M24  
LmxM.19.0190 multiprotein-bridging factor 1, putative  
LmxM.19.0240 hypothetical protein, conserved  
LmxM.19.0260 C-terminal motor kinesin, putative  
LmxM.19.0295 RNA binding protein  
LmxM.19.0300 RNA binding protein, putative  
LmxM.19.0320 intraflagellar transport protein 52  
LmxM.19.0340 hypothetical protein, conserved  
LmxM.19.0390 40S ribosomal protein S13, putative  
LmxM.19.0440 nucleosome assembly protein, putative  
LmxM.19.0490 hypothetical protein, conserved  
LmxM.19.0520 paraflagellar rod component, putative  
LmxM.19.0550 metallo-peptidase, Clan MG, Family M24  
LmxM.19.0630 histone H3 variant V



LmxM.19.0650 hypothetical protein, conserved  
LmxM.19.0710 glycosomal malate dehydrogenase  
LmxM.19.0760 transporter, putative  
LmxM.19.0790 signal recognition particle protein, putative  
LmxM.19.0800 ABC transporter, putative  
LmxM.19.1005 4-coumarate:coa ligase-like protein  
LmxM.19.1040 phenylalanyl-tRNA synthetase, putative  
LmxM.19.1120 proteasome regulatory non-ATP-ase subunit 9, putative  
LmxM.19.1160 hypothetical protein, conserved  
LmxM.19.1230 hypothetical protein, conserved  
LmxM.19.1280 SPFH domain / Band 7 family, putative  
LmxM.19.1290 SPFH domain / Band 7 family, putative  
LmxM.19.1400 hypothetical protein, conserved  
LmxM.19.1420 cysteine peptidase A (CPA)  
LmxM.19.1530 peptidylprolyl isomerase-like protein  
LmxM.19.1560 inosine-5'-monophosphate dehydrogenase  
LmxM.19.1590 ATP-dependent zinc metallopeptidase  
LmxM.20.0080 hypothetical protein, conserved  
LmxM.20.0240 transmembrane protein, putative  
LmxM.20.0560 cytidine triphosphate synthase, putative  
LmxM.20.0660 serine/threonine protein phosphatase 2A regulatory subunit, putative  
LmxM.20.0810 vesicular-fusion protein nsf, putative  
LmxM.20.0950 conserved protein, unknown function  
LmxM.20.0970 1,2-Dihydroxy-3-keto-5-methylthiopentene dioxygenase, putative  
LmxM.20.1180 calpain-like cysteine peptidase  
LmxM.20.1185 calpain-like cysteine peptidase, putative  
LmxM.20.1280 calpain-like cysteine peptidase, putative  
LmxM.20.1290 nucleosome assembly protein (NAP), putative  
LmxM.20.1310 small myristoylated protein 1  
LmxM.20.1350 coatomer beta subunit, putative  
LmxM.20.1400 paralyzed flagella protein 16  
LmxM.20.1550 amidohydrolase, putative  
LmxM.20.1560 amidohydrolase, putative  
LmxM.20.1570 amidohydrolase, putative  
LmxM.20.1640 Suppressor of G2 allele of SKP1, putative  
LmxM.20.1650 ribosomal protein S11 homolog  
LmxM.20.1690 soluble n-ethylmaleimide sensitive factor, putative  
LmxM.21.0100 hypothetical protein, conserved  
LmxM.21.0125 DNA topoisomerase 1A  
LmxM.21.0210 hypothetical protein, conserved  
LmxM.21.0340 mitochondrial processing peptidase alpha subunit, putative  
LmxM.21.0380 Protein of unknown function (DUF667), putative  
LmxM.21.0430 hypothetical protein, conserved  
LmxM.21.0490 DnaJ protein, putative  
LmxM.21.0530 hypothetical protein, conserved  
LmxM.21.0540 Lupus La protein homolog, putative  
LmxM.21.0550 dihydrolipoamide acetyltransferase precursorlike protein  
LmxM.21.0610 RNA helicase, putative  
LmxM.21.0710 ribonuclease L inhibitor, putative  
LmxM.21.0730 60S ribosomal protein L36, putative  
LmxM.21.0760 proteasome regulatory non-ATP-ase subunit 5, putative  
LmxM.21.0800 CCR4-NOT transcription complex subunit 1  
LmxM.21.0810 methionyl-tRNA synthetase, putative  
LmxM.21.0820 Temperature dependent protein affecting M2 dsRNA replication, putative  
LmxM.21.0825 plectin, putative  
LmxM.21.0840 metallo-peptidase, Clan MG, Family M24

LmxM.21.0845 hypoxanthine-guanine phosphoribosyltransferase  
LmxM.21.0850 xanthine phosphoribosyltransferase  
LmxM.21.0980 intraflagellar transport protein 172, putative  
LmxM.21.1050 60S ribosomal protein L9, putative  
LmxM.21.1060 40S ribosomal protein S23, putative  
LmxM.21.1080 cell division protein kinase 2  
LmxM.21.1090 T-complex protein 1, delta subunit, putative  
LmxM.21.1250 adenylate kinase, putative  
LmxM.21.1340 ATP synthase, putative  
LmxM.21.1430 2-oxoisovalerate dehydrogenase alpha subunit, putative  
LmxM.21.1552 ATP-dependent RNA helicase SUB2, putative  
LmxM.21.1555 hypothetical protein, conserved  
LmxM.21.1566 Microtubule-binding protein MIP-T3, putative  
LmxM.21.1700 proteasome alpha 2 subunit, putative  
LmxM.21.1710 cytochrome c oxidase subunit VI, putative  
LmxM.21.1720 60S ribosomal protein L32  
LmxM.21.1760 centromere/microtubule binding protein cbf5, putative  
LmxM.21.1770 ATP synthase F1 subunit gamma protein, putative  
LmxM.21.1780 40S ribosomal protein S6, putative  
LmxM.21.1820 60S ribosomal protein L37a, putative  
LmxM.21.1830 proteasome subunit alpha type-5, putative  
LmxM.22.0060 transcription factor-like protein  
LmxM.22.0110 GMP synthase [glutamine-hydrolysing]  
LmxM.22.0180 hypothetical protein, conserved  
LmxM.22.0210 Nucleolar protein 168, putative  
LmxM.22.0260 translocon-associated protein (TRAP), alpha subunit, putative  
LmxM.22.0300 hypothetical protein, conserved  
LmxM.22.0420 40S ribosomal protein S15, putative  
LmxM.22.0470 Putative tRNA binding domain containing protein, putative  
LmxM.22.0570 proteasome regulatory ATPase subunit 1, putative  
LmxM.22.0620 proteasome regulatory ATPase subunit 5, putative  
LmxM.22.0730 cytoskeleton associated protein, putative  
LmxM.22.0770 NADH-cytochrome b5 reductase, putative  
LmxM.22.0990 hypothetical protein, conserved  
LmxM.22.1110 dynein heavy chain, cytosolic, putative  
LmxM.22.1140 adaptor complex AP-1 medium subunit, putative  
LmxM.22.1290 ribonucleoside-diphosphate reductase small chain, putative  
LmxM.22.1330 hypothetical protein, conserved  
LmxM.22.1360 farnesyl pyrophosphate synthase, putative  
LmxM.22.1370 intraflagellar transport protein-like protein  
LmxM.22.1460 i/6 autoantigen-like protein  
LmxM.22.1500 ATP-dependent DEAD/H RNA helicase, putative  
LmxM.22.1520 40S ribosomal protein L14, putative  
LmxM.22.1540 alanyl-tRNA synthetase, putative  
LmxM.23.0040 tryparedoxin peroxidase  
LmxM.23.0050 peptidyl-prolyl cis-trans isomerase, putative  
LmxM.23.0080 hypothetical protein, conserved  
LmxM.23.0110 mannose-1-phosphate guanyltransferase  
LmxM.23.0200 endoribonuclease L-PSP (pb5), putative  
LmxM.23.0220 p-glycoprotein, putative  
LmxM.23.0260 argininosuccinate synthase, putative  
LmxM.23.0360 NADP-dependent alcohol dehydrogenase, putative  
LmxM.23.0370 cytochrome c oxidase subunit 10, putative  
LmxM.23.0547 hypothetical protein, conserved  
LmxM.23.0550 ubiquitin-activating enzyme E1, putative  
LmxM.23.0560 kinesin-C

LmxM.23.0640 hypothetical protein, conserved  
LmxM.23.0680 mitochondrial DNA primase, putative  
LmxM.23.0690 3-ketoacyl-CoA thiolase-like protein  
LmxM.23.0710 acetyl-CoA synthetase, putative  
LmxM.23.0760 mitochondrial RNA binding protein, putative  
LmxM.23.0860 quinone oxidoreductase-like protein  
LmxM.23.0950 metallo-peptidase, Clan MF, Family M17  
LmxM.23.1000 hypothetical protein, unknown function  
LmxM.23.1020 hypothetical protein, unknown function  
LmxM.23.1165 coronin, putative  
LmxM.23.1220 T-complex protein 1, gamma subunit, putative  
LmxM.23.1310 dynein heavy chain, putative  
LmxM.23.1410 succinate dehydrogenase and fumarate reductase iron-sulfur protein, putative  
LmxM.23.1470 hypothetical protein, conserved  
LmxM.23.1480 alanine racemase, putative  
LmxM.23.1510 V-type proton ATPase subunit a, putative  
LmxM.23.1550 hypothetical protein, conserved  
LmxM.23.1580 Nucleoside 2-deoxyribosyltransferase, putative  
LmxM.23.1640 Galactose oxidase, central domain containing protein, putative  
LmxM.23.1750 hypothetical protein, conserved  
LmxM.24.0040 60S ribosomal protein L17, putative  
LmxM.24.0100 Calmodulin-binding, putative  
LmxM.24.0140 ankyrin/TPR repeat protein  
LmxM.24.0280 Dynein intermediate chain 1, axonemal  
LmxM.24.0320 fumarate hydratase, putative  
LmxM.24.0370 aspartate aminotransferase, putative  
LmxM.24.0600 Ribosome 60S biogenesis N-terminal, putative  
LmxM.24.0640 Kinesin-13 3, putative  
LmxM.24.0761 malic enzyme  
LmxM.24.0770 malic enzyme, putative  
LmxM.24.0840 dynein light chain p28, axonemal, putative  
LmxM.24.0850 triosephosphate isomerase  
LmxM.24.1500 IgE-dependent histamine-releasing factor, putative  
LmxM.24.1560 hypothetical protein, conserved  
LmxM.24.1570 RNA recognition motif (a.k.a. RRM, RBD, or RNP domain)/RNA recognition motif (a.k.a. RRM, RBD, o  
LmxM.24.1630 Succinate dehydrogenase [ubiquinone] flavoprotein subunit, mitochondrial  
LmxM.24.1640 Male sterility protein, putative  
LmxM.24.1840 lysophospholipase, putative  
LmxM.24.1980 hypothetical protein, conserved  
LmxM.24.2030 3-oxoacyl-(acyl-carrier protein) reductase, putative  
LmxM.24.2060 transketolase, putative  
LmxM.24.2070 40S ribosomal protein S8, putative  
LmxM.24.2110 3-hydroxy-3-methylglutaryl-CoA synthase, putative  
LmxM.24.2160 Glycerophosphoryl diester phosphodiesterase family, putative  
LmxM.24.2180 Trypanosome basal body component protein  
LmxM.24.2210 60S ribosomal protein L12, putative  
LmxM.24.2320 mitogen-activated protein kinase  
LmxM.25.0080 poly(A)-binding protein, putative  
LmxM.25.0120 electron transfer flavoprotein, putative  
LmxM.25.0130 elongation factor, putative  
LmxM.25.0190 ubiquitin carboxyl-terminal hydrolase, putative  
LmxM.25.0530 ABC transporter, mitochondrial, putative  
LmxM.25.0540 hypothetical protein, conserved  
LmxM.25.0620 RNA polymerase I second largest subunit, putative  
LmxM.25.0670 epsin, putative  
LmxM.25.0715 hypothetical protein, conserved

LmxM.25.0720 eukaryotic initiation factor 5a, putative  
LmxM.25.0750 protein phosphatase, putative  
LmxM.25.0910 cyclophilin a, putative  
LmxM.25.0980 dynein heavy chain, putative  
LmxM.25.1000 hypothetical protein, conserved  
LmxM.25.1060 hypothetical protein, conserved  
LmxM.25.1080 hypothetical protein, conserved  
LmxM.25.1090 magnesium transporter protein 2  
LmxM.25.1120 aldehyde dehydrogenase, mitochondrial precursor  
LmxM.25.1130 cytochrome oxidase subunit VII  
LmxM.25.1170 ATP synthase subunit beta, mitochondrial, putative  
LmxM.25.1180 ATP synthase subunit beta, mitochondrial, putative  
LmxM.25.1210 hypothetical protein, conserved  
LmxM.25.1340 protein transport protein Sec24C, putative  
LmxM.25.1420 GTP-binding protein, putative  
LmxM.25.1460 cAMP response protein, putative  
LmxM.25.1540 hypothetical protein, conserved  
LmxM.25.1600 Flagella-associated protein 251, putative  
LmxM.25.1610 Eukaryotic translation initiation factor 3 subunit F  
LmxM.25.1620 hypothetical protein, conserved  
LmxM.25.1640 hypothetical protein, conserved  
LmxM.25.1710 pyruvate dehydrogenase E1 beta subunit, putative  
LmxM.25.1770 3-oxo-5-alpha-steroid 4-dehydrogenase, putative  
LmxM.25.1820 hypothetical protein, conserved  
LmxM.25.1840 General negative regulator of transcription subunit 5  
LmxM.25.2010 2,4-dihydroxyhept-2-ene-1,7-dioic acid aldolase, putative  
LmxM.25.2020 hypothetical protein, conserved  
LmxM.25.2090 hypothetical protein, conserved  
LmxM.25.2130 succinyl-CoA synthetase alpha subunit, putative  
LmxM.25.2340 AGC essential kinase 1  
LmxM.25.2360 Pumilio homology domain family member 8  
LmxM.25.2410 hypothetical protein, conserved  
LmxM.25.2450 histone H4  
LmxM.26.0010 brix domain containing-like protein  
LmxM.26.0030 glycine dehydrogenase, putative  
LmxM.26.0140 adenine phosphoribosyltransferase  
LmxM.26.0170 60S ribosomal protein L7, putative  
LmxM.26.0320 C-1-tetrahydrofolate synthase, cytoplasmic, putative  
LmxM.26.0430 nucleotide binding protein-like protein  
LmxM.26.0620 10 kDa heat shock protein, putative  
LmxM.26.0650 Flagella-associated protein 61, putative  
LmxM.26.0660 protein disulfide isomerase, putative  
LmxM.26.0680 Protein of unknown function (DUF2012), putative  
LmxM.26.0830 aspartate--ammonia ligase, putative  
LmxM.26.0880 40S ribosomal protein S16, putative  
LmxM.26.1020 Inner arm dynein 5-1  
LmxM.26.1040 hypothetical protein, conserved  
LmxM.26.1240 heat shock protein 70-related protein  
LmxM.26.1380 prefoldin-like protein  
LmxM.26.1550 trifunctional enzyme alpha subunit, mitochondrial precursor-like protein  
LmxM.26.1570 thimet oligopeptidase, putative  
LmxM.26.1610 Proline dehydrogenase, mitochondrial  
LmxM.26.1630 40S ribosomal protein S33, putative  
LmxM.26.1710 cytochrome c oxidase subunit V, putative  
LmxM.26.1790 Nucleolar protein 287, putative  
LmxM.26.1900 hypothetical protein, conserved

LmxM.26.1940 Thioesterase-like superfamily, putative  
LmxM.26.1960 hypothetical protein, conserved  
LmxM.26.2000 methyltransferase domain containing protein, putative  
LmxM.26.2250 hypothetical protein, conserved  
LmxM.26.2640 hypothetical protein, conserved  
LmxM.26.2660 Nucleoporin NUP92  
LmxM.26.2710 glutamate 5-kinase, putative  
LmxM.27.0040 metallo- peptidase, Clan M- Family M48  
LmxM.27.0070 hypothetical protein, conserved  
LmxM.27.0160 SET domain containing protein, putative  
LmxM.27.0190 proteasome alpha 7 subunit, putative  
LmxM.27.0210 Vacuolar iron transporter 1, putative  
LmxM.27.0240 kinetoplast-associated protein-like protein  
LmxM.27.0300 methylmalonyl-coenzyme a mutase, putative  
LmxM.27.0420 ribokinase, putative  
LmxM.27.0490 cysteine peptidase, Clan CA, family C2, putative  
LmxM.27.0510 cysteine peptidase, Clan CA, family C2, putative  
LmxM.27.0520 radial spoke protein 3, putative  
LmxM.27.0650 hypothetical protein, conserved  
LmxM.27.0760 ras-related protein RAB1A, putative  
LmxM.27.0810 glutaredoxin-like protein  
LmxM.27.0840 hypothetical protein, conserved  
LmxM.27.0870 Repeat of unknown function (DUF1126)/EF-hand domain pair, putative  
LmxM.27.0880 2-oxoglutarate dehydrogenase subunit, putative  
LmxM.27.0930 isovaleryl-coA dehydrogenase, putative  
LmxM.27.1030 hypothetical protein, conserved  
LmxM.27.1060 cysteine desulfurase, putative  
LmxM.27.1100 hypothetical protein, conserved  
LmxM.27.1110 guide RNA-binding protein of 21 kDa  
LmxM.27.1220 hypothetical protein, conserved  
LmxM.27.1250 Serine-threonine kinase receptor-associated protein, putative  
LmxM.27.1260 T-complex protein 1, beta subunit, putative  
LmxM.27.1300 KH domain containing protein, putative  
LmxM.27.1310 arginyl-tRNA synthetase, putative  
LmxM.27.1380 60S acidic ribosomal protein P0, putative  
LmxM.27.1380a hypothetical protein  
LmxM.27.1450 CBF/Mak21 family, putative  
LmxM.27.1460 proteasome regulatory non-ATP-ase subunit 3, putative  
LmxM.27.1640 BRO1-like domain/ALIX V-shaped domain binding to HIV, putative  
LmxM.27.1680 hypothetical protein, conserved  
LmxM.27.1710 eukaryotic translation release factor, putative  
LmxM.27.1730 Flabarin, putative  
LmxM.27.1805 Phosphoenolpyruvate carboxykinase [ATP], glycosomal  
LmxM.27.1807 Phosphoenolpyruvate carboxykinase [ATP], glycosomal  
LmxM.27.1820 hypothetical protein, unknown function  
LmxM.27.1870 trypanothione synthetase  
LmxM.27.1980 FtsJ cell division protein, putative  
LmxM.27.2000 GMP-PDE, delta subunit, putative  
LmxM.27.2020 D-lactate dehydrogenase-like protein  
LmxM.27.2030 branched-chain amino acid aminotransferase, putative  
LmxM.27.2100 RNA-binding protein, putative  
LmxM.27.2300 transcription elongation regulator-like protein  
LmxM.27.2330 GTP binding protein, putative  
LmxM.27.2360 hypothetical protein, conserved  
LmxM.27.2390 TPR-repeat protein, putative  
LmxM.27.2400 heat shock protein DNAJ, putative

LmxM.27.2480 hypothetical protein, conserved  
LmxM.28.0040 hypothetical protein, conserved  
LmxM.28.0110 proteasome beta 3 subunit, putative  
LmxM.28.0140 pantothenate kinase subunit, putative  
LmxM.28.0210 Histone H2B variant V  
LmxM.28.0340 hypothetical protein, conserved  
LmxM.28.0380 saccharopine dehydrogenase, putative  
LmxM.28.0480 carbonic anhydrase-like protein  
LmxM.28.0540 ribosomal protein S26, putative  
LmxM.28.0560 hypothetical protein, conserved  
LmxM.28.0690 serine/threonine protein phosphatase catalytic subunit, putative  
LmxM.28.0730 hypothetical protein, conserved  
LmxM.28.0825 RNA binding protein rbp16, putative  
LmxM.28.0890 ribonucleoside-diphosphate reductase large chain, putative  
LmxM.28.0930 Mitochondrial import receptor subunit ATOM46, putative  
LmxM.28.0960 40S ribosomal protein S14  
LmxM.28.1010 ribosomal protein S20, putative  
LmxM.28.1060 hypothetical protein, conserved  
LmxM.28.1110 WD domain, G-beta repeat, putative  
LmxM.28.1140 electron-transfer-flavoprotein, alpha polypeptide, putative  
LmxM.28.1200 luminal binding protein 1 (BiP), putative  
LmxM.28.1230 SMP-30/Gluconolactonase/LRE-like region, putative  
LmxM.28.1420 DNA polymerase kappa, putative  
LmxM.28.1570 hydrolase, alpha/beta fold family, putative  
LmxM.28.1730 proteasome regulatory non-ATP-ase subunit 2, putative  
LmxM.28.1740 NOL1/NOP2/sun family, putative  
LmxM.28.1780 DNA topoisomerase III, putative  
LmxM.28.1820 Replication factor A protein 1  
LmxM.28.1880 Nucleolar protein 136, putative  
LmxM.28.1990 Leucine-rich repeat protein 1, putative  
LmxM.28.2080 DEAD-box ATP-dependent RNA helicase, mitochondrial  
LmxM.28.2170 Mitochondrial import receptor subunit ATOM69, putative  
LmxM.28.2190 hypothetical protein, conserved  
LmxM.28.2260 glycosomal membrane protein, putative  
LmxM.28.2310 Eukaryotic translation initiation factor 3 subunit E  
LmxM.28.2420 2-oxoglutarate dehydrogenase, E2 component, dihydrolipoamide succinyltransferase, putative  
LmxM.28.2430 Vacuolar proton pump subunit B, putative  
LmxM.28.2445 Putative serine esterase (DUF676), putative  
LmxM.28.2510 acyl-CoA dehydrogenase, putative  
LmxM.28.2555 40S ribosomal protein S17, putative  
LmxM.28.2620 Coatomer subunit gamma  
LmxM.28.2740 activated protein kinase c receptor (LACK)  
LmxM.28.2770 heat-shock protein hsp70, putative  
LmxM.28.2820 heat shock protein 70, putative  
LmxM.28.2860 cytosolic malate dehydrogenase, putative  
LmxM.28.2910 glutamate dehydrogenase, putative  
LmxM.28.3030 Nucleoporin NUP149  
LmxM.29.0120 alkyl dihydroxyacetonephosphate synthase  
LmxM.29.0180 2-hydroxy-3-oxopropionate reductase, putative  
LmxM.29.0350 kinesin, putative  
LmxM.29.0380 phosphatase 2C, putative  
LmxM.29.0430 quiescin sulfhydryl oxidase, putative  
LmxM.29.0440 Ribosome recycling factor, putative  
LmxM.29.0460 aspartyl-tRNA synthetase, putative  
LmxM.29.0480 bystin, putative  
LmxM.29.0580 AMP-binding enzyme, putative

LmxM.29.0630 histidyl-tRNA synthetase, putative  
LmxM.29.0660 pdz domain containing protein, putative  
LmxM.29.0730 co-chaperone GrpE, putative  
LmxM.29.0760 hypothetical protein, conserved  
LmxM.29.0780 mitochondrial oligo\_U binding protein TBRGG1, putative  
LmxM.29.0850 surface protein amastin, putative  
LmxM.29.0880 adenosine kinase, putative  
LmxM.29.0970 p22 protein precursor, putative  
LmxM.29.1040 succinate dehydrogenase subunit 7  
LmxM.29.1110 RNA-binding protein, putative  
LmxM.29.1120 importin alpha, putative  
LmxM.29.1250 pyridoxal kinase, putative  
LmxM.29.2330 hypothetical protein, unknown function  
LmxM.29.2350 sphingosine phosphate lyase-like protein, putative  
LmxM.29.2370 ADP-ribosylation factor-like protein  
LmxM.29.2580 reticulon domain protein, 22 kDa potentially aggravating protein (pape22)  
LmxM.29.2740 TPR domain protein, conserved  
LmxM.29.2820 chaperonin HSP60/CNP60, putative  
LmxM.29.2850 hypothetical protein, conserved  
LmxM.29.2900 aldehyde dehydrogenase, putative  
LmxM.29.2980 glyceraldehyde 3-phosphate dehydrogenase, glycosomal  
LmxM.29.3040 eukaryotic translation initiation factor 3 subunit d  
LmxM.29.3090 RNA-binding protein 42 (RNA-binding motif protein 42), putative  
LmxM.29.3130 valyl-tRNA synthetase, putative  
LmxM.29.3150 Translocon-associated protein beta (TRAPB), putative  
LmxM.29.3190 3-hydroxy-3-methylglutaryl-CoA reductase, putative  
LmxM.29.3240 glutamyl-tRNA synthetase, putative  
LmxM.29.3310 MORN repeat-containing protein 1  
LmxM.29.3360 calmodulin-related protein, putative  
LmxM.29.3380 PAS-domain containing phosphoglycerate kinase, putative  
LmxM.29.3430 protein mkt1, putative  
LmxM.29.3500 S-adenosylmethionine synthetase  
LmxM.29.3580 serine/threonine-protein kinase, putative  
LmxM.29.3600 ATP synthase, epsilon chain, putative  
LmxM.29.3650 ribosomal protein L15, putative  
LmxM.29.3680 hypothetical protein, conserved  
LmxM.29.3690 Protein of unknown function (DUF3808), putative  
LmxM.30.0010 5-methyltetrahydropteroyltriglutamate--homocyst ei nemethyltransferase, putative  
LmxM.30.0050 cyclophilin, putative  
LmxM.30.0140 ubiquitin carboxyl-terminal hydrolase, putative  
LmxM.30.0190 nucleolar protein, putative  
LmxM.30.0250 ATP-dependent RNA helicase, putative  
LmxM.30.0390 Calpain-like protein 2  
LmxM.30.0440 cytoskeleton-associated protein CAP5.5, putative  
LmxM.30.0440b hypothetical protein  
LmxM.30.0560 mevalonate kinase, putative  
LmxM.30.0630 hypothetical protein, conserved  
LmxM.30.0640 mitochondrial RNA binding protein, putative  
LmxM.30.0680 C2 domain containing protein, putative  
LmxM.30.0930 sodium stibogluconate resistance protein, putative  
LmxM.30.0960 hypothetical protein  
LmxM.30.1010 hypothetical protein, conserved  
LmxM.30.1050 hypothetical protein, unknown function  
LmxM.30.1070 biotin/lipoate protein ligase-like protein  
LmxM.30.1130 amidohydrolase, putative  
LmxM.30.1140 monoglyceride lipase, putative

LmxM.30.1220 Pyrophosphate-energized vacuolar membrane proton pump 1, putative  
LmxM.30.1570 cytochrome c oxidase VIII (COX VIII), putative  
LmxM.30.1630 3-ketoacyl-CoA thiolase-like protein, putative  
LmxM.30.1640 thiolase protein-like protein  
LmxM.30.1680 hypothetical protein, conserved  
LmxM.30.1750 nucleosome assembly protein-like protein  
LmxM.30.1900 ubiquitin-fusion protein  
LmxM.30.2020 succinyl-diaminopimelate desuccinylase-like protein  
LmxM.30.2050 CRAL/TRIO domain containing protein, putative  
LmxM.30.2080 hypothetical protein, conserved  
LmxM.30.2150 prostaglandin f2-alpha synthase  
LmxM.30.2250 3,2-trans-enoyl-CoA isomerase, mitochondrial precursor, putative  
LmxM.30.2280 ADP-ribosylation factor, putative  
LmxM.30.2340 p-nitrophenylphosphatase, putative  
LmxM.30.2350 Symplekin tight junction protein C terminal, putative  
LmxM.30.2600 calreticulin, putative  
LmxM.30.2610 RNA polymerase ii largest subunit  
LmxM.30.2630 serine/threonine protein phosphatase pp1(5.9), putative  
LmxM.30.2640 2-oxoglutarate dehydrogenase, e3 component, lipoamidodehydrogenase-like protein  
LmxM.30.2650 acetoin dehydrogenase e3 component-like protein  
LmxM.30.2790 ADP-ribosylation factor, putative  
LmxM.30.2960 Repressor of differentiation kinase 2, putative  
LmxM.30.2970 acetyl-CoA carboxylase  
LmxM.30.3090 peptidase, putative  
LmxM.30.3110 Flagellum attachment zone protein 14  
LmxM.30.3130 methylcrotonoyl-coa carboxylase biotinylated subunitprotein-like protein  
LmxM.30.3160 protein kinase, putative  
LmxM.31.0020 nuclear segregation protein, putative  
LmxM.31.0050 protein transport protein SEC13  
LmxM.31.0230 dynein light chain, flagellar outer arm, putative  
LmxM.31.0270 hypothetical protein, conserved  
LmxM.31.0350 hypothetical protein, conserved  
LmxM.31.0360 hypothetical protein, conserved  
LmxM.31.0390 19S proteasome non-atpase subunit 8  
LmxM.31.0400 ATP-dependent RNA helicase HEL67  
LmxM.31.0520 profilin, putative  
LmxM.31.0630 AmmeMemoRadiSam system protein A/uncharacterized protein, PH0010 family, putative  
LmxM.31.0680 OSM3-like kinesin, putative  
LmxM.31.0720 hypothetical protein, conserved  
LmxM.31.0750 nuclear RNA binding domain  
LmxM.31.0830 hypothetical protein, unknown function  
LmxM.31.0840 hypothetical protein, conserved  
LmxM.31.0870 phenylalanyl-tRNA synthetase alpha chain, putative  
LmxM.31.0950 Staphylococcal nuclease homologue/Tudor domain containing protein, putative  
LmxM.31.1000 chaperonin containing t-complex protein, putative  
LmxM.31.1060 Dynein intermediate chain, axonemal  
LmxM.31.1160 long chain polyunsaturated fatty acid elongation enzyme-like protein  
LmxM.31.1200 proteasome regulatory non-ATP-ase subunit, putative  
LmxM.31.1280 RNA polymerase-like protein, putative  
LmxM.31.1500 Metalloprotease M41 FtsH, putative  
LmxM.31.1580 phosphomannose isomerase, putative  
LmxM.31.1730 coatomer subunit epsilon  
LmxM.31.1750 pumilio/PUF RNA binding protein 7, putative  
LmxM.31.1760 hypothetical protein, conserved  
LmxM.31.1770 phosphatidylethanolamine-binding protein, putative  
LmxM.31.1820 iron superoxide dismutase, putative



LmxM.31.1830 iron superoxide dismutase, putative  
LmxM.31.1850 Chaperonin HSP60, mitochondrial  
LmxM.31.1910 hypothetical protein, conserved  
LmxM.31.1930 hypothetical protein, conserved  
LmxM.31.1940 DnaJ homolog, putative  
LmxM.31.1960 1-acyl-sn-glycerol-3-phosphateacyltransferase-like protein, putative  
LmxM.31.1980 Flagella-associated protein 100, putative  
LmxM.31.2020 cop-coated vesicle membrane protein p24 precursor, putative  
LmxM.31.2150 hypothetical protein, conserved  
LmxM.31.2180 eukaryotic translation initiation factor 3 subunit k  
LmxM.31.2220 hypothetical protein, unknown function  
LmxM.31.2260 heat shock protein Hsp20, putative  
LmxM.31.2640 cystathionine beta-lyase, putative  
LmxM.31.2690 ribosomal protein L27, putative  
LmxM.31.2710 ribosomal protein L27, putative  
LmxM.31.2780 Nucleoporin NUP109  
LmxM.31.2810 RNA-binding protein, putative  
LmxM.31.2820 proteasome regulatory non-ATP-ase subunit, putative  
LmxM.31.2900 Outer dynein arm docking complex protein 2, putative  
LmxM.31.2950 nucleoside diphosphate kinase b  
LmxM.31.2970 tubulin binding cofactor A-like protein  
LmxM.31.2980 ATP binding protein-like protein  
LmxM.31.3010 leucine-rich repeat protein, putative  
LmxM.31.3130 ribosomal protein L3, putative  
LmxM.31.3140 pyrroline-5-carboxylate synthetase-like protein  
LmxM.31.3150 Flagellar Member 7  
LmxM.31.3210 Miro-like protein, putative  
LmxM.31.3230 dynein light intermediate chain, putative  
LmxM.31.3260 glucosamine-6-phosphate isomerase, putative  
LmxM.31.3270 chaperonin alpha subunit, putative  
LmxM.31.3310 dihydrolipoamide dehydrogenase, putative  
LmxM.31.3870 myosin XXI, putative  
LmxM.31.3900 60S ribosomal protein L8, putative  
LmxM.32.0240 thiol-dependent reductase 1  
LmxM.32.0260 RGG-containing protein 2, putative  
LmxM.32.0310 ATP-binding cassette sub-family F member 1, putative  
LmxM.32.0312 heat shock protein 83-1  
LmxM.32.0590 Coiled-coil domain-containing protein 40 homolog  
LmxM.32.0610 paraflagellar rod component, putative  
LmxM.32.0830 2,4-dienoyl-coa reductase fadh1, putative  
LmxM.32.1035 hypothetical protein, conserved  
LmxM.32.1070 hypothetical protein, unknown function  
LmxM.32.1150 pumilio protein, putative  
LmxM.32.1330 glutamine aminotransferase, putative  
LmxM.32.1380 mitogen activated protein kinase, putative  
LmxM.32.1590 3-ketoacyl-CoA reductase, putative  
LmxM.32.1610 cytosolic nonspecific dipeptidase, putative  
LmxM.32.1630 cyclophilin, putative  
LmxM.32.1690 DNA polymerase delta catalytic subunit, putative  
LmxM.32.1750 macrophage migration inhibitory factor-like protein  
LmxM.32.1870 nucleolar GTP-binding protein, putative  
LmxM.32.1920 Phosphate transport (Pho88), putative  
LmxM.32.2260 glycosyl hydrolase-like protein  
LmxM.32.2270 hypothetical protein, conserved  
LmxM.32.2300 udp-glc 4'-epimerase, putative  
LmxM.32.2340 succinyl-coA:3-ketoacid-coenzyme A transferase, mitochondrial precursor, putative

LmxM.32.2350 Rab-GTPase-TBC domain containing protein, putative  
LmxM.32.2390 heat shock protein, putative  
LmxM.32.2440 KH-associated protein 1  
LmxM.32.2460 Flagellum attachment zone protein 12  
LmxM.32.2500 Radial spokehead-like protein, putative  
LmxM.32.2540 metallo-peptidase, Clan MA(E) Family M32  
LmxM.32.2550 isocitrate dehydrogenase (NAD+)  
LmxM.32.2570 metallo-peptidase, Clan MF, Family M17  
LmxM.32.2600 enoyl-CoA hydratase/Enoyl-CoA isomerase/3- hydroxyacyl-CoA dehydrogenase, putative  
LmxM.32.2730 guide RNA associated protein 1, putative  
LmxM.32.2740 translation initiation factor IF-2, putative  
LmxM.32.2810 transcription elongation factor-like protein  
LmxM.32.2860 hypothetical protein, conserved  
LmxM.32.3190 small nuclear ribonucleoprotein Smd2  
LmxM.32.3210 beta prime cop protein, putative  
LmxM.32.3270 fatty acid desaturase, putative  
LmxM.33.0010 short chain dehydrogenase, putative  
LmxM.33.0070 ascorbate peroxidase, putative  
LmxM.33.0080 glucose-6-phosphate dehydrogenase  
LmxM.33.0110 adenylate kinase, putative  
LmxM.33.0140 malate dehydrogenase  
LmxM.33.0230 intraflagellar transport protein 81, putative  
LmxM.33.0350 eukaryotic translation initiation factor 5, putative  
LmxM.33.0380 hypothetical protein, unknown function  
LmxM.33.0390 hypothetical protein, unknown function  
LmxM.33.0410 hypothetical protein, conserved  
LmxM.33.0490 importin beta-1 subunit, putative  
LmxM.33.0550 Cysteine leucine rich protein  
LmxM.33.0650 proteasome regulatory non-ATPase subunit 11, putative  
LmxM.33.0690 flagellar attachment zone protein 1  
LmxM.33.0820 elongation factor 1-beta  
LmxM.33.0910 hypothetical protein, conserved  
LmxM.33.0990 p-glycoprotein  
LmxM.33.1040 uracil phosphoribosyltransferase, putative  
LmxM.33.1090 dihydroxyacetone phosphate acyltransferase, putative  
LmxM.33.1170 hypothetical protein, conserved  
LmxM.33.1400 d-isomer specific 2-hydroxyacid dehydrogenase- like protein  
LmxM.33.1410 d-isomer specific 2-hydroxyacid dehydrogenase- like protein  
LmxM.33.1415 d-isomer specific 2-hydroxyacid dehydrogenase- like protein  
LmxM.33.1490 hypothetical protein, conserved  
LmxM.33.1520 p25-alpha, putative  
LmxM.33.2200 thioredoxin, putative  
LmxM.33.2340 asparaginyl-tRNA synthetase, putative  
LmxM.33.2420 glycosyltransferase-like protein  
LmxM.33.2430 DNAj-like protein  
LmxM.33.2470 ribosomal protein l35a, putative  
LmxM.33.2530 flagellar attachment zone protein, putative (fragment)  
LmxM.33.2540 Coiled-coil and C2 domain-containing protein  
LmxM.33.2560 hypothetical protein, conserved  
LmxM.33.2570 Flagellum attachment zone protein 8  
LmxM.33.2580 ALBA-domain protein 3  
LmxM.33.2610 ruvB-like DNA helicase, putative  
LmxM.33.2700 eukaryotic translation initiation factor 3 subunit g  
LmxM.33.2820 regulatory subunit of protein kinase a-like protein  
LmxM.33.2850 serine acetyltransferase, putative  
LmxM.33.2950 EF-hand domain pair, putative

LmxM.33.3050 cytochrome b5-like Heme/Steroid binding domain containing protein, putative  
LmxM.33.3190 NAD dependent epimerase/dehydratase family, putative  
LmxM.33.3380 aldose 1-epimerase-like protein  
LmxM.33.3440 DNA topoisomerase IB, large subunit  
LmxM.33.3470 amidinotransferase, putative  
LmxM.33.3500 ruvb-like 1 DNA helicase, putative  
LmxM.33.3560 Ankyrin repeats (3 copies)/Ankyrin repeats (many copies), putative  
LmxM.33.3660 transmembrane/endomembrane-like protein  
LmxM.33.3670 vacuolar ATP synthase catalytic subunit A, putative  
LmxM.33.3740 serine palmitoyltransferase-like protein  
LmxM.33.3820 TPR repeat, putative  
LmxM.33.3880 dynein heavy chain, putative  
LmxM.33.3890 hypothetical protein, conserved  
LmxM.33.3970 AP-1 adapter complex gamma subunit, putative  
LmxM.33.3980 nucleolar protein family a member-like protein  
LmxM.33.4060 ubiquitin hydrolase, putative  
LmxM.33.4120 Alpha/beta hydrolase family, putative  
LmxM.33.4130 Protein of unknown function (DUF1620), putative  
LmxM.33.4310 coatomer alpha subunit, putative  
LmxM.33.4340 20s proteasome beta 7 subunit, (putative)  
LmxM.33.4550 cell differentiation protein-like protein  
LmxM.33.4600 1,2-Dihydroxy-3-keto-5-methylthiopentene dioxygenase, putative  
LmxM.33.4620 cyclic nucleotide-binding domain containing protein, putative  
LmxM.34.0030 pyruvate kinase, putative  
LmxM.34.0050 2-oxoisovalerate dehydrogenase beta subunit, mitochondrial precursor, putative  
LmxM.34.0100 ubiquinol-cytochrome c reductase complex 14kD subunit, putative  
LmxM.34.0190 NLI interacting factor-like phosphatase, putative  
LmxM.34.0240 60S ribosomal protein L30  
LmxM.34.0320 serine palmitoyltransferase, putative  
LmxM.34.0330 short chain dehydrogenase, putative  
LmxM.34.0370 ATP-dependent DEAD-box RNA helicase, putative  
LmxM.34.0400 40S ribosomal protein S3A, putative  
LmxM.34.0820 aspartate aminotransferase, putative  
LmxM.34.0950 cell cycle sequence binding phosphoprotein (RBP33), putative  
LmxM.34.0980 aldose 1-epimerase-like protein  
LmxM.34.1010 casein kinase, putative  
LmxM.34.1050 protein kinase, putative  
LmxM.34.1130 oligosaccharyl transferase-like protein  
LmxM.34.1160 oligosaccharyl transferase subunit, putative  
LmxM.34.1180 NADH-dependent fumarate reductase, putative  
LmxM.34.1220 short chain dehydrogenase, putative  
LmxM.34.1230 short chain dehydrogenase, putative  
LmxM.34.1260 ATPase family associated with various cellular activities (AAA), putative  
LmxM.34.1300 ubiquitin-conjugating enzyme E2, putative  
LmxM.34.1330 thioredoxin, putative  
LmxM.34.1380 mitochondrial processing peptidase, beta subunit, putative  
LmxM.34.1410 threonyl-tRNA synthetase, putative  
LmxM.34.1480 arginase  
LmxM.34.1520 hypothetical protein, conserved  
LmxM.34.1540 rieske iron-sulfur protein, mitochondrial precursor, putative  
LmxM.34.1830 hypothetical protein, conserved  
LmxM.34.1880 60S ribosomal protein L5, putative  
LmxM.34.2050 60S ribosomal protein L32  
LmxM.34.2080 calcium motive p-type ATPase, putative  
LmxM.34.2090 kinesin, putative  
LmxM.34.2150 short chain dehydrogenase, putative

LmxM.34.2200 RNA-binding protein, putative  
LmxM.34.2210 kinetoplastid membrane protein-11  
LmxM.34.2270 ATP-dependent RNA helicase-like protein  
LmxM.34.2350 aminopeptidase P, putative  
LmxM.34.2400 Flagellar Member 5  
LmxM.34.2420 Autophagy-related protein 24  
LmxM.34.2490 hypothetical protein, conserved  
LmxM.34.2730 acyl-CoA dehydrogenase, putative  
LmxM.34.2740 galactokinase-like protein  
LmxM.34.2980 chaperone protein DnaJ, putative  
LmxM.34.3020 phospholipase A2-like protein, putative  
LmxM.34.3060 ubiquitin-activating enzyme E1, putative  
LmxM.34.3080 glycerol kinase, glycosomal, putative  
LmxM.34.3100 ATP-dependent RNA helicase, putative  
LmxM.34.3110 Present in the outer mitochondrial membrane proteome 7  
LmxM.34.3200 RNA-binding protein, putative  
LmxM.34.3230 cystathione gamma lyase, putative  
LmxM.34.3280 60S ribosomal subunit protein L31, putative  
LmxM.34.3310 Leucine Rich repeats (2 copies), putative  
LmxM.34.3340 6-phosphogluconate dehydrogenase, decarboxylating, putative  
LmxM.34.3370 hypothetical protein, conserved  
LmxM.34.3560 CRAL/TRIO, N-terminal domain/CRAL/TRIO domain containing protein, putative  
LmxM.34.3700 glycosomal membrane protein  
LmxM.34.3720 hypothetical protein, conserved  
LmxM.34.3760 60S ribosomal protein L27A/L29, putative  
LmxM.34.3790 60S ribosomal protein L23, putative  
LmxM.34.3840 proteasome beta 2 subunit, putative  
LmxM.34.3860 T-complex protein 1, eta subunit, putative  
LmxM.34.3900 hypothetical protein, conserved  
LmxM.34.4060 Regulatory subunit of type II PKA R-subunit, putative  
LmxM.34.4130 polyadenylate-binding protein 2  
LmxM.34.4380 hypothetical protein, conserved  
LmxM.34.4430 mitochondrial phosphate transporter, putative  
LmxM.34.4470 Co-chaperone protein P23  
LmxM.34.4630 chaperone protein DnaJ, putative  
LmxM.34.4690 PACRGB  
LmxM.34.4700 Kinesin-13 6, putative  
LmxM.34.4710 Hsp70 protein, putative  
LmxM.34.4750 glyceraldehyde-3-phosphate dehydrogenase-like protein  
LmxM.34.4770 peptidyl-prolyl cis-trans isomerase (cyclophilin- 40), putative  
LmxM.34.4810 BRCA1 C Terminus (BRCT) domain containing protein, putative  
LmxM.34.4850 proteasome alpha 1 subunit, putative  
LmxM.34.4860 Mitochondrial import receptor subunit ATOM40, putative  
LmxM.34.4880 TPR repeat, putative  
LmxM.34.4940 hypothetical protein, conserved  
LmxM.34.4950 hypothetical protein, conserved  
LmxM.34.5040 polyadenylate-binding protein 1, putative  
LmxM.34.5330 isopentenyl-diphosphate delta-isomerase (type II), putative  
LmxM.34.5340 Dynein heavy chain and region D6 of dynein motor/Ankyrin repeats (3 copies), putative  
LmxM.35.2470 hypothetical protein, conserved  
LmxM.36.0050 PUF1, putative  
LmxM.36.0070 stress-inducible protein STI1 homolog  
LmxM.36.0180 elongation factor 2  
LmxM.36.0250 eukaryotic translation initiation factor 3 subunit I  
LmxM.36.0310 dolicholphosphate-mannose synthase, putative  
LmxM.36.0370 phosphatidylinositol-4-phosphate 5-kinase-like protein

LmxM.36.0440 hypothetical protein, conserved  
LmxM.36.0480 hypothetical protein, conserved  
LmxM.36.0570 Elongation factor G1, mitochondrial, putative  
LmxM.36.0720 mitogen-activated protein kinase 2  
LmxM.36.0740 hypothetical protein, conserved  
LmxM.36.0890 eukaryotic translation initiation factor 6 (eIF-6), putative  
LmxM.36.0930 40S ribosomal protein S18, putative  
LmxM.36.0950 dynein heavy chain, putative  
LmxM.36.0970 hypothetical protein, conserved  
LmxM.36.0980 40S ribosomal protein S10, putative  
LmxM.36.0990 40S ribosomal protein S10, putative  
LmxM.36.1070 ribosomal protein L24, putative  
LmxM.36.1140 short chain 3-hydroxyacyl-CoA dehydrogenase, putative  
LmxM.36.1260 fructose-1,6-bisphosphate aldolase  
LmxM.36.1340 N-acetyltransferase subunit Nat1, putative  
LmxM.36.1370 Valosin-containing protein, putative  
LmxM.36.1380 hypothetical protein, conserved  
LmxM.36.1430 translation elongation factor 1-beta, putative  
LmxM.36.1520 Serine/threonine-protein kinase NEK17, putative  
LmxM.36.1600 proteasome subunit alpha type-1, putative  
LmxM.36.1630 clathrin heavy chain, putative  
LmxM.36.1635 poly-zinc finger protein 2, putative  
LmxM.36.1640 universal minicircle sequence binding protein, putative  
LmxM.36.1650 proteasome subunit beta type-5, putative  
LmxM.36.1750 hypothetical protein, conserved  
LmxM.36.1850 DEAD box RNA helicase, putative  
LmxM.36.1860 Ribosomal protein S5, C-terminal domain containing protein, putative  
LmxM.36.1920 hypothetical protein, conserved  
LmxM.36.1960 phosphomannomutase, putative  
LmxM.36.2020 chaperonin HSP60, mitochondrial precursor  
LmxM.36.2030 chaperonin HSP60, mitochondrial precursor  
LmxM.36.2250 developmentally regulated GTP-binding protein 1, putative  
LmxM.36.2310 Mitochondrial ribosomal protein S18, putative  
LmxM.36.2320 glucokinase 1-like protein  
LmxM.36.2350 glyceraldehyde 3-phosphate dehydrogenase, cytosolic, putative  
LmxM.36.2360 tyrosine aminotransferase, putative  
LmxM.36.2380 sterol 24-c-methyltransferase, putative  
LmxM.36.2390 sterol 24-c-methyltransferase, putative  
LmxM.36.2400 hypothetical protein, conserved  
LmxM.36.2420 serine peptidase, Clan SC, Family S9B  
LmxM.36.2570 membrane-bound acid phosphatase precursor  
LmxM.36.2590 membrane-bound acid phosphatase 2, putative  
LmxM.36.2660 dihydrolipoamide acetyltransferase precursor, putative  
LmxM.36.2700 hypothetical protein, conserved  
LmxM.36.2860 40S ribosomal protein S24e  
LmxM.36.2950 succinyl-CoA ligase [GDP-forming] beta-chain, putative  
LmxM.36.3000 ATP-dependent RNA helicase, putative  
LmxM.36.3070 fibrillarlin  
LmxM.36.3090 hypothetical protein, conserved  
LmxM.36.3100 ATP synthase, putative  
LmxM.36.3210 14-3-3 protein 1, putative  
LmxM.36.3270 60S ribosomal protein L22, putative  
LmxM.36.3280 Enoyl-CoA hydratase/isomerase family/2-enoyl-CoA Hydratase C-terminal region, putative  
LmxM.36.3380 hypothetical protein, conserved  
LmxM.36.3390 ribosomal protein L29, putative  
LmxM.36.3410 short chain dehydrogenase-like protein

LmxM.36.3470 2-oxoglutarate dehydrogenase E1 component, putative  
LmxM.36.3530pa polyubiquitin, putative  
LmxM.36.3590 cysteine synthase, putative  
LmxM.36.3620 EF-hand domain pair, putative  
LmxM.36.3750 40S ribosomal protein S27-1, putative  
LmxM.36.3770 transcription factor BTF3, putative  
LmxM.36.3780 Spindle pole body protein 1, putative  
LmxM.36.3840 glycyl tRNA synthetase, putative  
LmxM.36.3880 eukaryotic translation initiation factor 3 subunit, putative  
LmxM.36.3910 S-adenosylhomocysteine hydrolase  
LmxM.36.4040 hypothetical protein, conserved  
LmxM.36.4150 hypothetical protein, conserved  
LmxM.36.4170 oxidoreductase, putative  
LmxM.36.4230 paraflagellar rod component, putative  
LmxM.36.4360 Regulatory particle triple-A ATPase subunit 6  
LmxM.36.4450 mitochondrial intermediate peptidase, putative  
LmxM.36.4460 hypothetical protein, conserved  
LmxM.36.4500 Protein of unknown function (DUF2870), putative  
LmxM.36.4560 PSP1 C-terminal conserved region, putative  
LmxM.36.4650 60S acidic ribosomal protein, putative  
LmxM.36.4780 paraflagellar rod component, putative  
LmxM.36.4910 hypothetical protein, conserved  
LmxM.36.5010 40S ribosomal protein SA, putative  
LmxM.36.5100 hypothetical protein, conserved  
LmxM.36.5120 40S ribosomal protein SA, putative  
LmxM.36.5130 hypothetical protein, conserved  
LmxM.36.5140 VHS domain containing protein, putative  
LmxM.36.5150 kinesin-D  
LmxM.36.5180 aldehyde dehydrogenase, putative  
LmxM.36.5340 hypothetical protein, conserved  
LmxM.36.5360 ubiquinone biosynthesis methyltransferase, putative  
LmxM.36.5380 NADH dehydrogenase, putative  
LmxM.36.5390 phosphoribosylpyrophosphate synthetase, putative  
LmxM.36.5550 hypothetical protein, conserved  
LmxM.36.5620 isoleucyl-tRNA synthetase, putative  
LmxM.36.5850 flagellum targeting protein kharon1  
LmxM.36.5870 paraflagellar rod component, putative  
LmxM.36.5910 2,3-diketo-5-methylthio-1-phosphopentane phosphatase, putative  
LmxM.36.6030 hypothetical protein, conserved  
LmxM.36.6060 eukaryotic translation initiation factor 4 gamma 4  
LmxM.36.6100 CCR4-NOT transcription complex subunit 10, putative  
LmxM.36.6160 hypothetical protein, conserved  
LmxM.36.6270 chaperone protein DnaJ, putative  
LmxM.36.6290 glucose transporter 2  
LmxM.36.6310 homocysteine S-methyltransferase, putative  
LmxM.36.6340 ubiquitin-protein ligase, putative  
LmxM.36.6370 GTPase activating protein, putative  
LmxM.36.6380 rib72 protein-like protein  
LmxM.36.6480 histidine secretory acid phosphatase, putative  
LmxM.36.6540 similarity to endo-1-like protein  
LmxM.36.6650 2,3-bisphosphoglycerate-independent phosphoglycerate mutase  
LmxM.36.6730 hypothetical protein, conserved  
LmxM.36.6750 prolyl endopeptidase  
LmxM.36.6760 ATP synthase delta (OSCP) subunit, putative  
LmxM.36.6770 beta adaptin, putative  
LmxM.36.6910 T-complex protein 1, theta subunit, putative

LmxM.36.6940 protein disulfide isomerase 2  
LmxM.36.6980 eukaryotic translation initiation factor 3 subunit c  
LmxM.36.6995 cytochrome oxidase subunit IX, putative

Table S4. *L. mexicana* non-poly(A) interactome. Deubiquitinases (DUBs) are highlighted in yellow

| Gene ID      | Protein Name                                                                            |
|--------------|-----------------------------------------------------------------------------------------|
| LmxM.01.0030 | Kinesin-13 1, putative                                                                  |
| LmxM.01.0060 | hypothetical protein, conserved                                                         |
| LmxM.01.0110 | glutaredoxin-like protein                                                               |
| LmxM.01.0140 | hypothetical protein                                                                    |
| LmxM.01.0210 | CUE domain/Domain of unknown function (DUF1771)/Smr domain containing protein, putative |
| LmxM.01.0220 | cyclophilin type peptidyl-prolyl cis-trans isomerase, putative                          |
| LmxM.01.0310 | acidocalcisomal exopolyphosphatase, putative                                            |
| LmxM.01.0380 | Dyggve-Melchior-Clausen syndrome protein, putative                                      |
| LmxM.01.0640 | HSP70-like protein                                                                      |
| LmxM.01.0650 | mitochondrial-processing peptidase subunit beta, putative                               |
| LmxM.01.0690 | PLAC8 family, putative                                                                  |
| LmxM.01.0710 | ubiquitin activating enzyme, putative                                                   |
| LmxM.02.0090 | hypothetical protein, conserved                                                         |
| LmxM.02.0260 | small GTP binding protein rab6-like protein                                             |
| LmxM.02.0290 | Mitogen-activated kinase kinase kinase, putative                                        |
| LmxM.02.0360 | casein kinase II, alpha chain, putative                                                 |
| LmxM.02.0410 | Kinetoplastid RNA editing protein 1, putative                                           |
| LmxM.02.0540 | hypothetical protein, conserved                                                         |
| LmxM.02.0560 | hypothetical protein, unknown function                                                  |
| LmxM.02.0660 | Nop14-like family, putative                                                             |
| LmxM.02.0700 | hypothetical protein, conserved                                                         |
| LmxM.03.0080 | glycerol-3-phosphate acyl transferase                                                   |
| LmxM.03.0130 | acetyltransferase, putative                                                             |
| LmxM.03.0160 | ABC transporter protein, putative                                                       |
| LmxM.03.0190 | U2 splicing auxiliary factor, putative                                                  |
| LmxM.03.0320 | hypothetical protein, conserved                                                         |
| LmxM.03.0440 | 60S acidic ribosomal protein P2, putative                                               |
| LmxM.03.0450 | TLD domain protein, conserved                                                           |
| LmxM.03.0530 | hypothetical protein, conserved                                                         |
| LmxM.03.0570 | quinone oxidoreductase, putative                                                        |
| LmxM.03.0580 | hypothetical protein, conserved                                                         |
| LmxM.03.0610 | kinase-like protein                                                                     |
| LmxM.03.0700 | hypothetical protein, conserved                                                         |
| LmxM.03.0710 | Aminoacyl-tRNA editing domain containing protein, putative                              |
| LmxM.03.0750 | TatD related DNase, putative                                                            |
| LmxM.03.0760 | hypothetical protein, conserved                                                         |
| LmxM.03.0770 | Ubiquitin-like domain containing protein, putative                                      |
| LmxM.03.0840 | hypothetical protein, conserved                                                         |
| LmxM.03.0880 | hypothetical protein, conserved                                                         |
| LmxM.03.0900 | peter pan protein, putative                                                             |
| LmxM.03.0930 | Amidohydrolase family, putative                                                         |
| LmxM.04.0045 | hypothetical protein, conserved                                                         |
| LmxM.04.0060 | DNA topoisomerase type IB small subunit, putative                                       |
| LmxM.04.0120 | exosome complex exonuclease RRP40, putative                                             |
| LmxM.04.0270 | Mitochondrial 39-S ribosomal protein L47 (MRP-L47), putative                            |
| LmxM.04.0290 | Alcohol dehydrogenase GroES-like domain containing protein, putative                    |
| LmxM.04.0330 | mitochondrial exoribonuclease DSS-1, putative                                           |
| LmxM.04.0430 | hypothetical protein, conserved                                                         |
| LmxM.04.0610 | hypothetical protein, conserved                                                         |
| LmxM.04.0690 | axonemal dynein light chain, putative                                                   |
| LmxM.04.0760 | hypothetical protein                                                                    |
| LmxM.04.0770 | hypothetical protein                                                                    |
| LmxM.04.0950 | hypothetical protein                                                                    |
| LmxM.04.0960 | adenylate kinase, putative                                                              |
| LmxM.04.1080 | Transcriptional repressor TCF25, putative                                               |
| LmxM.04.1120 | hypothetical protein                                                                    |
| LmxM.04.1130 | cytochrome c oxidase assembly factor, putative                                          |
| LmxM.04.1220 | hypothetical protein, conserved                                                         |
| LmxM.05.0010 | Kinetochore interacting protein 1, putative                                             |
| LmxM.05.0050 | hypothetical protein, conserved                                                         |



|               |                                                                      |
|---------------|----------------------------------------------------------------------|
| LmxM.05.0060  | major vault protein, putative                                        |
| LmxM.05.0190  | Fip1 motif/Zinc finger C-x8-C-x5-C-x3-H type (and similar), putative |
| LmxM.05.0200  | 50S ribosome-binding GTPase, putative                                |
| LmxM.05.0240  | viscerotropic leishmaniasis antigen, putative                        |
| LmxM.05.0241  | viscerotropic leishmaniasis antigen, putative                        |
| LmxM.05.0390  | protein kinase, putative                                             |
| LmxM.05.0450  | hypothetical protein, conserved                                      |
| LmxM.05.0510  | ATP synthase F1, alpha subunit, putative                             |
| LmxM.05.0510b | hypothetical protein                                                 |
| LmxM.05.0600  | COG4 transport protein, putative                                     |
| LmxM.05.0640  | Ankyrin repeats (many copies)/Ankyrin repeats (3 copies), putative   |
| LmxM.05.0750  | Flavodoxin/Radical SAM superfamily/Wyosine base formation, putative  |
| LmxM.05.0820  | hypothetical protein, conserved                                      |
| LmxM.05.0920  | paraflagellar rod protein, putative                                  |
| LmxM.05.1050  | hypothetical protein, unknown function                               |
| LmxM.05.1060  | ATPase, putative                                                     |
| LmxM.05.1061  | ATPase, putative                                                     |
| LmxM.05.1130  | hypothetical protein, conserved                                      |
| LmxM.05.1190  | hypothetical protein, conserved                                      |
| LmxM.05.1200  | prefoldin subunit, putative                                          |
| LmxM.06.0040  | 39S mitochondrial ribosomal protein L46, putative                    |
| LmxM.06.0250  | hypothetical protein, conserved                                      |
| LmxM.06.0330  | hypothetical protein, conserved                                      |
| LmxM.06.0415  | 60S ribosomal protein L19, putative                                  |
| LmxM.06.0440  | hypothetical protein, conserved                                      |
| LmxM.06.0460  | ATP-NAD kinase-like protein                                          |
| LmxM.06.0490  | hypothetical protein, conserved                                      |
| LmxM.06.0560  | deoxyuridine triphosphatase, putative                                |
| LmxM.06.0580  | 60S ribosomal protein L23a, putative                                 |
| LmxM.06.0610  | carbonic anhydrase family protein, putative                          |
| LmxM.06.0620  | Putative Phosphatase/Protein of unknown function DUF89, putative     |
| LmxM.06.0650  | lanosterol synthase, putative                                        |
| LmxM.06.0700  | C2 domain/Ankyrin repeats (3 copies), putative                       |
| LmxM.06.0870  | protein arginine n-methyltransferase 7                               |
| LmxM.06.0920  | hypothetical protein, conserved                                      |
| LmxM.06.0990  | hypothetical protein, conserved                                      |
| LmxM.06.1000  | SET domain containing protein, putative                              |
| LmxM.06.1040  | Outer dynein arm docking complex protein 2, putative                 |
| LmxM.06.1070  | deoxyribose-phosphate aldolase, putative                             |
| LmxM.06.1180  | protein kinase, putative                                             |
| LmxM.07.0050  | alpha-adaptin-like protein                                           |
| LmxM.07.0080  | Golgi/lysosome glycoprotein 1, putative                              |
| LmxM.07.0090  | cobalamin-dependent methionine synthase, putative                    |
| LmxM.07.0100  | pitrilysin-like metalloprotease                                      |
| LmxM.07.0120  | Sec7 domain containing protein, putative                             |
| LmxM.07.0200  | phosphatidylglycerolphosphate synthase, mitochondrial, putative      |
| LmxM.07.0280  | ubiquitin-protein ligase-like, putative                              |
| LmxM.07.0290  | Uncharacterised protein family (UPF0172), putative                   |
| LmxM.07.0300  | hypothetical protein, conserved                                      |
| LmxM.07.0320  | hypothetical protein, conserved                                      |
| LmxM.07.0460  | acyl-CoA dehydrogenase, mitochondrial precursor, putative            |
| LmxM.07.0470  | pre-rrna-processing protein tsr1 homolog                             |
| LmxM.07.0480  | Dynein heavy chain, N-terminal region 2, putative                    |
| LmxM.07.0510  | 60S ribosomal protein L7a, putative                                  |
| LmxM.07.0650  | vacuolar-type Ca <sup>2+</sup> -ATPase, putative                     |
| LmxM.07.0720  | hypothetical protein, conserved                                      |
| LmxM.07.0802  | hypothetical protein, conserved                                      |
| LmxM.07.0850  | ubiquitin-protein ligase, putative                                   |
| LmxM.07.0940  | Domain of unknown function (DUF3437), putative                       |
| LmxM.07.1080  | hypothetical protein, conserved                                      |
| LmxM.07.1110  | hypothetical protein, conserved                                      |
| LmxM.07.1120  | proteasome regulatory non-ATP-ase subunit, putative                  |
| LmxM.07.1130  | hypothetical protein, conserved                                      |
| LmxM.07.1150  | N-terminal region of Chorein, a TM vesicle-mediated sorter, putative |

|                        |                                                                                                        |
|------------------------|--------------------------------------------------------------------------------------------------------|
| LmxM.08.0010           | adaptor complex protein (AP) 3 delta subunit 1, putative                                               |
| LmxM.08.0080           | ATP-dependent DEAD/H RNA helicase, putative                                                            |
| LmxM.08.0120           | hypothetical protein, conserved                                                                        |
| LmxM.08.0340           | hypothetical protein, conserved                                                                        |
| LmxM.08.0430           | hypothetical protein, conserved                                                                        |
| LmxM.08.0440           | hypothetical protein, conserved                                                                        |
| LmxM.08.0510           | ribose-phosphate pyrophosphokinase, putative                                                           |
| LmxM.08.0560           | hypothetical protein, conserved                                                                        |
| LmxM.08.0620           | hypothetical protein, conserved                                                                        |
| LmxM.08.0920           | hypothetical protein, conserved                                                                        |
| LmxM.08.0930           | protein kinase, putative                                                                               |
| LmxM.08.1000           | AAA domain (dynein-related subfamily)/von Willebrand factor type A domain containing protein, putative |
| LmxM.08.1030a          | hypothetical protein                                                                                   |
| LmxM.08.1040           | hypothetical protein                                                                                   |
| LmxM.08.1060           | cathepsin L-like protease, putative                                                                    |
| LmxM.08.1080           | cathepsin L-like protease, putative                                                                    |
| LmxM.08.1170           | MRB1 complex subunit MRB3010                                                                           |
| LmxM.08.1190           | intraflagellar transport protein 122B, putative                                                        |
| LmxM.08_29.0090        | intraflagellar transport protein 27                                                                    |
| LmxM.08_29.0220        | protein transport protein Sec24A, putative                                                             |
| LmxM.08_29.0390        | RNA binding protein, putative                                                                          |
| LmxM.08_29.0420        | hypothetical protein, conserved                                                                        |
| LmxM.08_29.0430        | hypothetical protein, conserved                                                                        |
| LmxM.08_29.0440        | hypothetical protein, conserved                                                                        |
| LmxM.08_29.0610        | hypothetical protein, conserved                                                                        |
| LmxM.08_29.0690        | NADH-ubiquinone oxidoreductase complex I subunit, putative                                             |
| LmxM.08_29.0710        | bardet-biedl syndrome 7 protein                                                                        |
| LmxM.08_29.0720        | Elongation factor Ts, mitochondrial, putative                                                          |
| LmxM.08_29.0750        | U3 small nucleolar ribonucleoprotein protein MPP10, putative                                           |
| LmxM.08_29.1090        | ribosomal protein L1a, putative                                                                        |
| LmxM.08_29.1110        | hypothetical protein, conserved                                                                        |
| LmxM.08_29.1570        | metallo-peptidase, Clan MH, Family M18                                                                 |
| LmxM.08_29.1690        | Acyl-coenzyme A thioesterase, putative                                                                 |
| LmxM.08_29.1730        | histone H2A, putative                                                                                  |
| LmxM.08_29.1740        | histone H2A, putative                                                                                  |
| LmxM.08_29.1760        | paraflagellar rod protein 1D, putative                                                                 |
| LmxM.08_29.1820        | hypothetical protein, conserved                                                                        |
| LmxM.08_29.1840        | hypothetical protein, conserved                                                                        |
| LmxM.08_29.1980        | hypothetical protein, conserved                                                                        |
| LmxM.08_29.2020        | 5'-AMP-activated protein kinase catalytic subunit alpha, putative                                      |
| LmxM.08_29.2040        | hypothetical protein, conserved                                                                        |
| LmxM.08_29.2060        | hypothetical protein, conserved                                                                        |
| LmxM.08_29.2120        | VIT family, putative                                                                                   |
| LmxM.08_29.2190        | hypothetical protein, conserved                                                                        |
| LmxM.08_29.2210        | leucine-rich repeat-containing protein                                                                 |
| LmxM.08_29.2230        | hypothetical protein, conserved                                                                        |
| LmxM.08_29.2280        | acyltransferase, putative                                                                              |
| <b>LmxM.08_29.2300</b> | <b>DUB2; ubiquitin carboxyl-terminal hydrolase, putative</b>                                           |
| LmxM.08_29.2320        | mitogen-activated protein kinase kinase 1                                                              |
| LmxM.08_29.2370        | 60S ribosomal protein L39, putative                                                                    |
| LmxM.08_29.2380        | kinesin, putative                                                                                      |
| LmxM.08_29.2390        | kinesin, putative                                                                                      |
| LmxM.08_29.2430        | hypothetical protein, unknown function                                                                 |
| LmxM.08_29.2461        | 60S ribosomal protein L13, putative                                                                    |
| LmxM.08_29.2540        | NOL1/NOP2/sun family, putative                                                                         |
| LmxM.08_29.2550        | RNA polymerase-associated protein CTR9, putative                                                       |
| LmxM.08_29.2590        | hypothetical protein, conserved                                                                        |
| LmxM.08_29.2610        | hypothetical protein, conserved                                                                        |
| LmxM.08_29.2640        | hypothetical protein, conserved                                                                        |
| LmxM.08_29.2680        | hypothetical protein, conserved                                                                        |
| LmxM.08_29.2760        | Putative intraflagellar transport protein C3                                                           |
| LmxM.08_29.2810        | hypothetical protein                                                                                   |
| LmxM.09.0070           | RNA helicase, putative                                                                                 |
| LmxM.09.0210           | Domain of unknown function (DUF4586), putative                                                         |

|                     |                                                                          |
|---------------------|--------------------------------------------------------------------------|
| LmxM.09.0250        | DNA replication licensing factor MCM4                                    |
| LmxM.09.0400        | kinetoplastid kinetochore protein 10, putative                           |
| LmxM.09.0410        | kinetoplastid kinetochore protein 19, putative                           |
| LmxM.09.0530        | leucine-rich repeat protein, putative                                    |
| LmxM.09.0560        | Histidine phosphatase superfamily (branch 1), putative                   |
| LmxM.09.0600        | cyclin 1                                                                 |
| LmxM.09.0720        | cleavage and polyadenylation specificity factor 30 kDa subunit, putative |
| LmxM.09.0750        | acyl-CoA binding protein, putative                                       |
| LmxM.09.0760        | hypothetical protein, conserved                                          |
| LmxM.09.0790        | hypothetical protein, conserved                                          |
| LmxM.09.0900        | ef-hand protein 5, putative                                              |
| LmxM.09.0920        | calmodulin, putative                                                     |
| LmxM.09.0930        | calmodulin, putative                                                     |
| LmxM.09.0960        | hypothetical protein, conserved                                          |
| LmxM.09.0980        | hypothetical protein, conserved                                          |
| LmxM.09.1020        | LEM3 (ligand-effect modulator 3) family / CDC50 family, putative         |
| LmxM.09.1040        | phospholipid:diacylglycerol acyltransferase, putative                    |
| LmxM.09.1180        | hypothetical protein, conserved                                          |
| LmxM.09.1220        | AAA family ATPase, putative                                              |
| LmxM.09.1230        | hypothetical protein, conserved                                          |
| LmxM.09.1260        | Bromodomain, putative                                                    |
| LmxM.09.1300        | PPPDE putative peptidase domain containing protein, putative             |
| LmxM.09.1420        | hypothetical protein, conserved                                          |
| LmxM.09.1520        | hypothetical protein, conserved                                          |
| LmxM.10.0050        | Dos2-interacting transcription regulator of RNA-Pol-II, putative         |
| LmxM.10.0110        | hypothetical protein, conserved                                          |
| LmxM.10.0270        | exonuclease, putative                                                    |
| LmxM.10.0310        | protein transport protein SEC23, putative                                |
| LmxM.10.0460        | GP63, leishmanolysin                                                     |
| LmxM.10.0465        | GP63, leishmanolysin                                                     |
| LmxM.10.0500        | hypothetical protein, conserved                                          |
| LmxM.10.0530        | hypothetical protein, conserved                                          |
| LmxM.10.0560        | zinc binding dehydrogenase-like protein                                  |
| LmxM.10.0620        | FLA1-binding protein                                                     |
| LmxM.10.0630        | Flagellum adhesion protein 1                                             |
| LmxM.10.0700        | RNA recognition motif. (a.k.a. RRM, RBD, or RNP domain), putative        |
| LmxM.10.0800        | hypothetical protein, conserved                                          |
| LmxM.10.0810        | hypothetical protein, conserved                                          |
| LmxM.10.0840        | hypothetical protein, conserved                                          |
| LmxM.10.0860        | Ribosome biogenesis protein Nop16, putative                              |
| LmxM.10.0900        | hypothetical protein, conserved                                          |
| LmxM.10.0950        | translation initiation factor eif-2b beta subunit, putative              |
| LmxM.10.0970        | histone H3, putative                                                     |
| LmxM.10.0990        | histone H3                                                               |
| LmxM.10.1040        | Domain of Unknown Function (DUF1042), putative                           |
| LmxM.10.1060        | hypothetical protein, conserved                                          |
| LmxM.10.1280        | Beta-1,2 mannoside phosphorylase                                         |
| LmxM.11.0140        | hypothetical protein, conserved                                          |
| LmxM.11.0150        | hypothetical protein, conserved                                          |
| LmxM.11.0160        | hypothetical protein, conserved                                          |
| LmxM.11.0260        | hypothetical protein, conserved                                          |
| LmxM.11.0410        | Nucleolar protein 89, putative                                           |
| LmxM.11.0580        | cytochrome b5, putative                                                  |
| LmxM.11.0710        | hypothetical protein, conserved                                          |
| LmxM.11.0740        | hypothetical protein, conserved                                          |
| LmxM.11.0760        | 40S ribosomal protein S21, putative                                      |
| LmxM.11.0770        | 40S ribosomal protein S21, putative                                      |
| LmxM.11.0850        | Alpha/beta hydrolase family, putative                                    |
| LmxM.11.0900        | 60S ribosomal protein L24, putative                                      |
| LmxM.11.0970        | 40S ribosomal protein S5                                                 |
| LmxM.11.0990        | adaptin-related protein-like protein                                     |
| LmxM.11.1120        | hypothetical protein                                                     |
| LmxM.11.1130partial | hypothetical protein                                                     |
| LmxM.11.1190        | 40S ribosomal protein S15A, putative                                     |

|              |                                                                                     |
|--------------|-------------------------------------------------------------------------------------|
| LmxM.11.1210 | SKP1-like protein                                                                   |
| LmxM.11.1330 | Flagellar-associated PapD-like, putative                                            |
| LmxM.12.0090 | hypothetical protein, conserved                                                     |
| LmxM.12.0120 | hypothetical protein, conserved                                                     |
| LmxM.12.0220 | hydroxyacylglutathione hydrolase, putative                                          |
| LmxM.12.0280 | ornithine decarboxylase, putative                                                   |
| LmxM.12.0430 | hypothetical protein, conserved                                                     |
| LmxM.12.0600 | hypothetical protein, conserved                                                     |
| LmxM.12.0700 | hypothetical protein, conserved                                                     |
| LmxM.12.1180 | hypothetical protein, conserved                                                     |
| LmxM.12.1300 | SET domain containing protein, putative                                             |
| LmxM.12.1320 | Vacuolar sorting protein 39 domain 1/Vacuolar sorting protein 39 domain 2, putative |
| LmxM.13.0080 | mitochondrial DNA polymerase I protein B, putative                                  |
| LmxM.13.0110 | SURF1 family, putative                                                              |
| LmxM.13.0220 | ras-related protein RAB5B, putative                                                 |
| LmxM.13.0240 | Flagella-associated protein 73, putative                                            |
| LmxM.13.0390 | alpha tubulin                                                                       |
| LmxM.13.0550 | Uncharacterized ACR, COG1678, putative                                              |
| LmxM.13.0640 | hypothetical protein, conserved                                                     |
| LmxM.13.0650 | hypothetical protein, conserved                                                     |
| LmxM.13.0720 | oxidoreductase-like protein                                                         |
| LmxM.13.0730 | ubiquitin-like protein                                                              |
| LmxM.13.0810 | hypothetical protein, conserved                                                     |
| LmxM.13.0920 | hypothetical protein, conserved                                                     |
| LmxM.13.0980 | amp deaminase-like protein                                                          |
| LmxM.13.0990 | hypothetical protein, conserved                                                     |
| LmxM.13.1000 | hypothetical protein, conserved                                                     |
| LmxM.13.1040 | subtilisin peptidase                                                                |
| LmxM.13.1110 | hypothetical protein, conserved                                                     |
| LmxM.13.1170 | hypothetical protein, conserved                                                     |
| LmxM.13.1230 | 40S ribosomal protein S4, putative                                                  |
| LmxM.13.1340 | hypothetical protein, conserved                                                     |
| LmxM.13.1460 | programmed cell death 6 protein-like protein                                        |
| LmxM.13.1520 | ATPase family associated with various cellular activities (AAA), putative           |
| LmxM.13.1560 | ras-family member, GTP-binding protein, putative                                    |
| LmxM.13.1600 | hypothetical protein, conserved                                                     |
| LmxM.13.1620 | squalene monooxygenase-like protein                                                 |
| LmxM.13.1630 | mitochondrial DNA polymerase I protein D, putative                                  |
| LmxM.13.1680 | pyrroline-5-carboxylate reductase                                                   |
| LmxM.14.0080 | hypothetical protein, conserved                                                     |
| LmxM.14.0210 | Domain of unknown function (DUF4201), putative                                      |
| LmxM.14.0230 | hypothetical protein, conserved                                                     |
| LmxM.14.0280 | Nucleus and spindle associated protein 3, putative                                  |
| LmxM.14.0290 | hypothetical protein, conserved                                                     |
| LmxM.14.0350 | threonine synthase, putative                                                        |
| LmxM.14.0410 | Protein of unknown function (DUF1253), putative                                     |
| LmxM.14.0440 | pyridine nucleotide-disulphide oxidoreductase, putative                             |
| LmxM.14.0570 | WD domain, G-beta repeat, putative                                                  |
| LmxM.14.0780 | ribosomal protein L21, putative                                                     |
| LmxM.14.0790 | hypothetical protein, conserved                                                     |
| LmxM.14.0851 | cysteine peptidase, Clan CA, family C2, putative                                    |
| LmxM.14.0890 | hypothetical protein, conserved                                                     |
| LmxM.14.0910 | glutathione synthetase, putative                                                    |
| LmxM.14.0970 | hypothetical protein, conserved                                                     |
| LmxM.14.1060 | dynein heavy chain, putative                                                        |
| LmxM.14.1120 | kinesin K39, putative                                                               |
| LmxM.14.1330 | DnaJ domain containing protein, putative                                            |
| LmxM.14.1430 | Cilia and flagella associated protein 44, putative                                  |
| LmxM.14.1480 | glutathione-S-transferase/glutaredoxin, putative                                    |
| LmxM.15.0060 | Eukaryotic translation initiation factor 4 gamma 1                                  |
| LmxM.15.0070 | hypothetical protein, conserved                                                     |
| LmxM.15.0080 | hypothetical protein, conserved                                                     |
| LmxM.15.0281 | ribonucleoprotein p18, mitochondrial precursor, putative                            |
| LmxM.15.0320 | Isoprenylcysteine alpha-carbonyl methylesterase, putative                           |

|                     |                                                                                          |
|---------------------|------------------------------------------------------------------------------------------|
| LmxM.15.0330        | alpha/beta hydrolase fold, putative                                                      |
| LmxM.15.0370        | 60S acidic ribosomal protein, putative                                                   |
| LmxM.15.0380        | 60S acidic ribosomal protein, putative                                                   |
| LmxM.15.0390        | cytoplasmic l-asparaginase i-like protein                                                |
| LmxM.15.0410        | hypothetical protein, conserved                                                          |
| LmxM.15.0440a       | hypothetical protein                                                                     |
| LmxM.15.0440c       | hypothetical protein (fragment)                                                          |
| LmxM.15.0580        | signal peptidase subunit, putative                                                       |
| LmxM.15.0610        | CRAL/TRIO domain containing protein, putative                                            |
| LmxM.15.0670        | hypothetical protein, conserved                                                          |
| LmxM.15.0780        | hypothetical protein, conserved                                                          |
| LmxM.15.0800        | hypothetical protein, conserved                                                          |
| LmxM.15.0810        | peroxisomal membrane protein (Pex16), putative                                           |
| LmxM.15.0820        | GDP dissociation inhibitor, putative                                                     |
| LmxM.15.0890        | ABC transporter, putative                                                                |
| LmxM.15.0970        | NAD/FAD dependent dehydrogenase, putative                                                |
| LmxM.15.1020        | farnesyl synthetase, putative                                                            |
| LmxM.15.1190        | cyclic nucleotide-binding domain containing protein, putative                            |
| LmxM.15.1200        | protein kinase, putative                                                                 |
| LmxM.15.1207        | 60S acidic ribosomal protein P2                                                          |
| LmxM.15.1290        | mitochondrial DNA topoisomerase II                                                       |
| <b>LmxM.15.1300</b> | <b>DUB9; ubiquitin hydrolase, putative</b>                                               |
| LmxM.15.1310        | cation transporter, putative                                                             |
| LmxM.15.1350        | hypothetical protein, conserved                                                          |
| LmxM.15.1400        | hypothetical protein, conserved                                                          |
| LmxM.15.1420        | mismatch repair protein MSH3, putative                                                   |
| LmxM.15.1480        | cAMP specific phosphodiesterase, putative                                                |
| LmxM.16.0020        | AAA domain containing protein, putative                                                  |
| LmxM.16.0050        | DEAD/DEAH box helicase/Helicase conserved C-terminal domain containing protein, putative |
| LmxM.16.0060        | peroxisome assembly protein, putative                                                    |
| LmxM.16.0080        | Galactose oxidase, central domain/Domain of unknown function (DUF4110), putative         |
| LmxM.16.0160        | 50S ribosomal protein L17, putative                                                      |
| LmxM.16.0290        | proteasome 26S non-ATPase subunit 9, putative                                            |
| LmxM.16.0300        | protein kinase, putative                                                                 |
| LmxM.16.0310        | Met-10+ like-protein, putative                                                           |
| LmxM.16.0380        | tubulin tyrosine ligase, putative                                                        |
| LmxM.16.0390        | XRN 5'-3' exonuclease N-terminus, putative                                               |
| LmxM.16.0510        | hypothetical protein, conserved                                                          |
| LmxM.16.0575        | histone H3                                                                               |
| LmxM.16.0600        | histone H3, putative                                                                     |
| LmxM.16.0610        | histone H3, putative                                                                     |
| LmxM.16.0660        | hypothetical protein, conserved                                                          |
| <b>LmxM.16.0730</b> | <b>DUB10; ubiquitin hydrolase, putative</b>                                              |
| LmxM.16.0750        | hypothetical protein, unknown function                                                   |
| LmxM.16.0780        | N-terminal region of Chorein, a TM vesicle-mediated sorter, putative                     |
| LmxM.16.0830        | Iron-sulfur assembly protein 1, putative                                                 |
| LmxM.16.0860        | hypothetical protein, conserved                                                          |
| LmxM.16.0920        | flagellar calcium-binding protein, putative                                              |
| LmxM.16.0980        | hypothetical protein, conserved                                                          |
| LmxM.16.1010partial | hypothetical protein                                                                     |
| LmxM.16.1070        | hypothetical protein, conserved                                                          |
| LmxM.16.1150        | hypothetical protein, conserved                                                          |
| LmxM.16.1170        | 60S ribosomal protein L39, putative                                                      |
| LmxM.16.1190        | Domain of unknown function DUF221, putative                                              |
| LmxM.16.1210        | hypothetical protein, conserved                                                          |
| LmxM.16.1230        | hypothetical protein, conserved                                                          |
| LmxM.16.1260        | hypothetical protein, conserved                                                          |
| LmxM.16.1320        | cytochrome c, putative                                                                   |
| LmxM.16.1340        | hypothetical protein, conserved                                                          |
| LmxM.16.1350        | DNA-directed rna polymerase I largest subunit, putative                                  |
| LmxM.16.1360        | amidase, putative                                                                        |
| LmxM.16.1370        | hypothetical protein, conserved                                                          |
| LmxM.16.1380        | small GTPase, putative                                                                   |
| LmxM.16.1390        | EMG1/NEP1 methyltransferase, putative                                                    |

|              |                                                                     |
|--------------|---------------------------------------------------------------------|
| LmxM.16.1410 | hypothetical protein, conserved                                     |
| LmxM.16.1490 | hypothetical protein, conserved                                     |
| LmxM.16.1550 | Component of motile flagella 6, putative                            |
| LmxM.16.1560 | hypothetical protein, conserved                                     |
| LmxM.17.0081 | elongation factor 1-alpha                                           |
| LmxM.17.0082 | elongation factor 1-alpha                                           |
| LmxM.17.0130 | hypothetical protein, unknown function                              |
| LmxM.17.0350 | dihydrouridine synthase (Dus), putative                             |
| LmxM.17.0490 | protein kinase, putative                                            |
| LmxM.17.0570 | hypothetical protein, conserved                                     |
| LmxM.17.0620 | Acyl CoA binding protein, putative                                  |
| LmxM.17.0640 | VID27 cytoplasmic protein, putative                                 |
| LmxM.17.0710 | Myb-like DNA-binding domain containing protein, putative            |
| LmxM.17.0720 | hypothetical protein, conserved                                     |
| LmxM.17.0730 | GRAM domain containing protein, putative                            |
| LmxM.17.0740 | GRAM domain containing protein, putative                            |
| LmxM.17.0760 | Alpha/beta hydrolase family, putative                               |
| LmxM.17.0780 | Acyl CoA binding protein, putative                                  |
| LmxM.17.0840 | hypothetical protein, conserved                                     |
| LmxM.17.0850 | hypothetical protein, conserved                                     |
| LmxM.17.0920 | ATP-dependent RNA helicase, putative                                |
| LmxM.17.0990 | hypothetical protein, conserved                                     |
| LmxM.17.1020 | glycosyltransferase (GlcNAc), putative                              |
| LmxM.17.1110 | kinesin, putative                                                   |
| LmxM.17.1240 | hypothetical protein, conserved                                     |
| LmxM.17.1250 | RNA cytidine acetyltransferase                                      |
| LmxM.17.1360 | L-galactonolactone oxidase, putative                                |
| LmxM.17.1370 | NUC130/3NT domain/SDA1, putative                                    |
| LmxM.17.1410 | zinc-finger protein ZPR1, putative                                  |
| LmxM.18.0090 | alpha glucosidase II subunit, putative                              |
| LmxM.18.0140 | Domain of unknown function DUF21, putative                          |
| LmxM.18.0320 | Domain of unknown function (DUF4379), putative                      |
| LmxM.18.0380 | hypothetical protein, conserved                                     |
| LmxM.18.0450 | serine peptidase, Clan SC, Family S10                               |
| LmxM.18.0470 | paralyzed flagella protein 20                                       |
| LmxM.18.0550 | hypothetical protein, conserved                                     |
| LmxM.18.0570 | hypothetical protein, conserved                                     |
| LmxM.18.0610 | metallo-peptidase, Clan MA(E), Family M41                           |
| LmxM.18.0650 | PA26 p53-induced protein (sestrin), putative                        |
| LmxM.18.0790 | DNA-directed RNA polymerase I subunit RPB5z, putative               |
| LmxM.18.0830 | Periodic tryptophan protein 2 homolog, putative                     |
| LmxM.18.0850 | hypothetical protein, conserved                                     |
| LmxM.18.0940 | Nrap protein, putative                                              |
| LmxM.18.1040 | putative 5-oxoprolinase, putative                                   |
| LmxM.18.1110 | Multisite-specific tRNA:(cytosine-C(5))-methyltransferase, putative |
| LmxM.18.1250 | ttaggg binding factor, putative                                     |
| LmxM.18.1310 | Acetyltransferase (GNAT) family, putative                           |
| LmxM.18.1360 | hypothetical protein, conserved                                     |
| LmxM.18.1460 | hypothetical protein, conserved                                     |
| LmxM.18.1510 | P-type H <sup>+</sup> -ATPase, putative                             |
| LmxM.18.1530 | kinesin, putative                                                   |
| LmxM.18.1560 | hypothetical protein, conserved                                     |
| LmxM.18.1590 | hypothetical protein, unknown function                              |
| LmxM.18.1610 | Noc2p family, putative                                              |
| LmxM.19.0050 | histone H2B                                                         |
| LmxM.19.0080 | DnaJ domain containing protein, putative                            |
| LmxM.19.0110 | hypothetical protein, conserved                                     |
| LmxM.19.0170 | hypothetical protein, conserved                                     |
| LmxM.19.0270 | hypothetical protein, conserved                                     |
| LmxM.19.0330 | intraflagellar transport protein 80, putative                       |
| LmxM.19.0470 | nuclear cap binding complex subunit CBP30, putative                 |
| LmxM.19.0580 | tubulin binding cofactor c, putative                                |
| LmxM.19.0660 | DNA-directed RNA polymerases I and III subunit RPAC1, putative      |
| LmxM.19.0670 | U3 snoRNA-associated protein UTP11, putative                        |

|                 |                                                                                             |
|-----------------|---------------------------------------------------------------------------------------------|
| LmxM.19.0680    | Flagellum attachment zone protein 7                                                         |
| LmxM.19.0700    | kinesin, putative                                                                           |
| LmxM.19.0810    | vps53-like domain protein                                                                   |
| LmxM.19.0970    | peptidyl-prolyl cis-trans isomerase, macrophage infectivity potentiator precursor, putative |
| LmxM.19.1010    | WD domain, G-beta repeat, putative                                                          |
| LmxM.19.1060    | hypothetical protein, conserved                                                             |
| LmxM.19.1110    | mitochondrial carrier protein, putative                                                     |
| LmxM.19.1150    | hypothetical protein, conserved                                                             |
| LmxM.19.1380    | cation transporter, putative                                                                |
| LmxM.19.1410    | Cid1 family poly A polymerase, putative                                                     |
| LmxM.19.1440    | mitogen-activated protein kinase 4                                                          |
| LmxM.19.1570    | ELMO/CED-12 family, putative                                                                |
| LmxM.20.0010    | DNA-directed RNA polymerase III, putative                                                   |
| LmxM.20.0140    | hypothetical protein, conserved                                                             |
| LmxM.20.0260    | Midasin, putative                                                                           |
| LmxM.20.0370    | Metallo-dependent phosphatase-like domain-containing protein                                |
| LmxM.20.0375    | Metallo-dependent phosphatase-like domain-containing protein                                |
| LmxM.20.0510    | SSU ribosomal protein, mitochondrial, putative                                              |
| LmxM.20.0570    | hypothetical protein, unknown function                                                      |
| LmxM.20.0650    | rRNA biogenesis protein-like protein                                                        |
| LmxM.20.0690    | hypothetical protein, conserved                                                             |
| LmxM.20.0700    | conserved protein, unknown function                                                         |
| LmxM.20.0780    | Tubulin/FtsZ family, putative                                                               |
| LmxM.20.0870    | ATP-dependent RNA helicase, putative                                                        |
| LmxM.20.0920    | AATF protein, putative                                                                      |
| LmxM.20.0930    | transmembrane protein, conserved                                                            |
| LmxM.20.0940    | cyclophilin 15, putative                                                                    |
| LmxM.20.1110    | hypothetical protein, conserved                                                             |
| LmxM.20.1120    | phosphatidylinositol 3-kinase, putative                                                     |
| LmxM.20.1130    | DNAj-like protein                                                                           |
| LmxM.20.1150    | Pre-mRNA-splicing factor 38, putative                                                       |
| LmxM.20.1360    | exosome-associated protein 1, putative                                                      |
| LmxM.20.1365    | hypothetical protein                                                                        |
| LmxM.20.1370    | pumilio protein 9, putative                                                                 |
| LmxM.20.1370a   | hypothetical protein                                                                        |
| LmxM.20.1430    | hypothetical protein, conserved                                                             |
| LmxM.20.1440    | hypothetical protein, conserved                                                             |
| LmxM.20.1620    | CHORD, putative                                                                             |
| LmxM.20.1700    | hypothetical protein, conserved                                                             |
| LmxM.20.1710    | tRNA (Uracil-5-)-methyltransferase, putative                                                |
| LmxM.20.1740    | hypothetical protein, conserved                                                             |
| LmxM.20.36.6470 | mitogen-activated protein kinase                                                            |
| LmxM.21.0060    | WD domain, G-beta repeat, putative                                                          |
| LmxM.21.0120    | cysteine peptidase, Clan CA, family C2, putative                                            |
| LmxM.21.0140    | hypothetical protein, conserved                                                             |
| LmxM.21.0170    | hypothetical protein, conserved                                                             |
| LmxM.21.0180    | CHAT domain containing protein, putative                                                    |
| LmxM.21.0190    | hypothetical protein, conserved                                                             |
| LmxM.21.0240    | hexokinase, putative                                                                        |
| LmxM.21.0250    | hexokinase, putative                                                                        |
| LmxM.21.0280    | hypothetical protein, conserved                                                             |
| LmxM.21.0290    | hypothetical protein, conserved                                                             |
| LmxM.21.0330    | Vps51/Vps67, putative                                                                       |
| LmxM.21.0390    | hypothetical protein, conserved                                                             |
| LmxM.21.0470    | vacuolar sorting-associated-like protein                                                    |
| LmxM.21.0600    | hypothetical protein, conserved                                                             |
| LmxM.21.0640    | phosphoglucomutase, putative                                                                |
| LmxM.21.0660    | nucleotide-binding protein, putative                                                        |
| LmxM.21.0670    | metallo-beta-lactamase family-like protein                                                  |
| LmxM.21.0750    | Nucleolar protein 91, putative                                                              |
| LmxM.21.0827    | hypothetical protein, conserved                                                             |
| LmxM.21.1020    | dynein arm light chain, putative                                                            |
| LmxM.21.1040    | kinesin, putative                                                                           |
| LmxM.21.1070    | 40S ribosomal protein S23, putative                                                         |

LmxM.21.1150 hypothetical protein, conserved  
 LmxM.21.1240 Flagellum attachment zone protein 6  
 LmxM.21.1270 hypothetical protein, conserved  
 LmxM.21.1290 vesicle-associated membrane protein, putative  
 LmxM.21.1310 hypothetical protein, conserved  
 LmxM.21.1330partial RecF/RecN/SMC N terminal domain/SMC proteins Flexible Hinge Domain, putative  
 LmxM.21.1350 PB1 domain containing protein, putative  
 LmxM.21.1440 cytochrome b5-like Heme/Steroid binding domain containing protein, putative  
 LmxM.21.1470 hypothetical protein, conserved  
 LmxM.21.1500 hypothetical protein, conserved  
 LmxM.21.1550 40S ribosomal protein S11, putative  
 LmxM.21.1558 Present in the outer mitochondrial membrane proteome 19  
 LmxM.21.1561 hypothetical protein, conserved  
 LmxM.21.1563 choline dehydrogenase, like protein  
 LmxM.21.1567 peroxidase, putative  
 LmxM.21.1569 Exocyst complex component EXO99  
 LmxM.21.1660 mitochondrial structure specific endonuclease I (SSE-1), putative  
 LmxM.21.1750 hypothetical protein, conserved  
 LmxM.22.0030 60S ribosomal protein L11 (L5, L16)  
 LmxM.22.0080 heat shock protein DNAJ, putative  
 LmxM.22.0140 hypothetical protein, conserved  
 LmxM.22.0160 hypothetical protein, conserved  
 LmxM.22.0170 hypothetical protein, conserved  
 LmxM.22.0220 Domain of unknown function (DUF1736), putative  
 LmxM.22.0380 Nucleoporin NUP132  
 LmxM.22.0450 Acetyltransferase (GNAT) family, putative  
 LmxM.22.0460 40S ribosomal protein S15, putative  
 LmxM.22.0560 kinesin, putative  
 LmxM.22.0650 guide RNA associated protein, GAP2, putative  
 LmxM.22.0710 hypothetical protein, conserved  
 LmxM.22.0780 NADH-cytochrome b5 reductase, putative  
 LmxM.22.0790 translation initiation factor SUI1, putative  
 LmxM.22.0860 Protein of unknown function (DUF3184), putative  
 LmxM.22.0900 Component of motile flagella 10, putative  
 LmxM.22.0910 Prp18 domain containing protein, putative  
 LmxM.22.0930 mitochondrial chaperone, putative  
 LmxM.22.0940 mitochondrial chaperone, putative  
 LmxM.22.0970 hypothetical protein, conserved  
 LmxM.22.0980 F-box and WD40 domain containing protein  
 LmxM.22.1040 hypothetical protein, conserved  
 LmxM.22.1200 ChaC-like protein, putative  
 LmxM.22.1240 translation initiation factor IF-2, putative  
 LmxM.22.1320 flagellar attachment zone protein, putative (fragment)  
 LmxM.22.1410 centrin-4, putative  
 LmxM.22.1450 cyclophilin, putative  
 LmxM.22.1560 40S ribosomal protein L14, putative  
 LmxM.22.1580 exosome complex exonuclease RRP45 homolog, putative  
 LmxM.22.1600 ser/thr protein phosphatase, putative  
 LmxM.22.1610 hypothetical protein, conserved  
 LmxM.22.1620 Cilia and flagella associated protein 47, putative  
 LmxM.22.1630 ccr4-not transcription complex subunit  
 LmxM.23.0010 hypothetical protein, conserved  
 LmxM.23.0020 hypothetical protein, conserved  
 LmxM.23.0030 Beta propeller protein 1  
 LmxM.23.0090 Domain of unknown function (DUF1767), putative  
 LmxM.23.0150 hypothetical protein, conserved  
 LmxM.23.0380 ATP-binding cassette protein subfamily G, member 5  
 LmxM.23.0480 hypothetical protein, conserved  
 LmxM.23.0543 5'-3' exoribonuclease C, putative  
 LmxM.23.0620 WD domain, G-beta repeat/BING4CT (NUC141) domain containing protein, putative  
 LmxM.23.0810 actin interacting protein-like protein  
 LmxM.23.0830 Na/H antiporter-like protein  
 LmxM.23.0840 hypothetical protein, unknown function  
 LmxM.23.0870 hypothetical protein



|                     |                                                                                                                  |
|---------------------|------------------------------------------------------------------------------------------------------------------|
| LmxM.23.0880a       | hypothetical protein                                                                                             |
| LmxM.23.1010        | hypothetical protein, conserved                                                                                  |
| LmxM.23.1065        | hypothetical protein, conserved                                                                                  |
| LmxM.23.1190        | hypothetical protein, conserved                                                                                  |
| LmxM.23.1290        | hypothetical protein, unknown function                                                                           |
| LmxM.23.1450        | Tumour suppressor, Mitostatin, putative                                                                          |
| LmxM.23.1630        | hypothetical protein, conserved                                                                                  |
| LmxM.24.0080        | Ring finger domain containing protein, putative                                                                  |
| LmxM.24.0110        | poly A polymerase regulatory subunit, putative                                                                   |
| LmxM.24.0130        | WD40/YVTN repeat-like-containing protein                                                                         |
| LmxM.24.0160        | hypothetical protein, conserved                                                                                  |
| LmxM.24.0190        | hypothetical protein, conserved                                                                                  |
| LmxM.24.0250        | ATP-dependent DEAD/H RNA helicase, putative                                                                      |
| LmxM.24.0300        | hypothetical protein, conserved                                                                                  |
| LmxM.24.0330        | Mitochondrial small ribosomal subunit Rsm22, putative                                                            |
| <b>LmxM.24.0420</b> | <b>DUB15; ubiquitin carboxyl-terminal hydrolase, putative, cysteine peptidase, Clan CA, family C12, putative</b> |
| LmxM.24.0440        | Protein of unknown function (DUF3184), putative                                                                  |
| LmxM.24.0450        | Protein of unknown function (DUF3184), putative                                                                  |
| LmxM.24.0520        | DNAJ domain protein, putative                                                                                    |
| <b>LmxM.24.0620</b> | <b>DUB12; ubiquitin carboxyl-terminal hydrolase, putative</b>                                                    |
| LmxM.24.0730        | signal recognition particle, putative                                                                            |
| LmxM.24.0830        | Mitochondrial SSU ribosomal protein, putative                                                                    |
| LmxM.24.0910        | minichromosome maintenance (MCM) complex subunit, putative                                                       |
| LmxM.24.0990        | replication factor C, subunit 1, putative                                                                        |
| LmxM.24.1080        | DNAJ domain protein, putative                                                                                    |
| LmxM.24.1140        | hypothetical protein, conserved                                                                                  |
| LmxM.24.1150        | DNA-directed RNA polymerase, mitochondrial                                                                       |
| LmxM.24.1220        | RNA-binding protein 38, putative                                                                                 |
| LmxM.24.1440        | HpcH/HpaI aldolase/citrate lyase family, putative                                                                |
| LmxM.24.1470        | hypothetical protein, conserved                                                                                  |
| LmxM.24.1490        | WD domain, G-beta repeat, putative                                                                               |
| LmxM.24.1500a       | hypothetical protein                                                                                             |
| LmxM.24.1770        | inhibitor of cysteine peptidase                                                                                  |
| LmxM.24.1780        | fatty acid transporter protein-like protein                                                                      |
| LmxM.24.1790        | RNA recognition motif. (a.k.a. RRM, RBD, or RNP domain), putative                                                |
| LmxM.24.1850        | hypothetical predicted multi-pass transmembrane protein                                                          |
| LmxM.24.1870        | hypothetical protein, conserved                                                                                  |
| LmxM.24.1950        | hypothetical protein, conserved                                                                                  |
| LmxM.24.1970        | Nucleoporin NUP76                                                                                                |
| LmxM.24.2020        | tubulin folding cofactor D, putative                                                                             |
| LmxM.24.2080        | 40S ribosomal protein S8, putative                                                                               |
| LmxM.24.2250        | fatty-acid desaturase, putative                                                                                  |
| LmxM.24.2260        | notchless homolog, putative                                                                                      |
| LmxM.24.2290        | cullin-like protein-like protein                                                                                 |
| LmxM.25.0150        | hypothetical protein, conserved                                                                                  |
| LmxM.25.0170        | cleavage and polyadenylation specificity factor, putative                                                        |
| LmxM.25.0200        | Putative intraflagellar transport protein F6                                                                     |
| LmxM.25.0220        | hypothetical protein, conserved                                                                                  |
| LmxM.25.0250        | hypothetical protein, conserved                                                                                  |
| LmxM.25.0270        | Nucleoporin NUP110                                                                                               |
| LmxM.25.0290        | RNA-binding protein, putative                                                                                    |
| LmxM.25.0320        | B9 domain-containing protein 2                                                                                   |
| LmxM.25.0410        | translation initiation factor SU11, putative                                                                     |
| LmxM.25.0420        | hypothetical protein, conserved                                                                                  |
| LmxM.25.0430        | WD domain, G-beta repeat/Utp13 specific WD40 associated domain containing protein, putative                      |
| LmxM.25.0440        | transcription factor IIIb, putative                                                                              |
| LmxM.25.0470        | Kringle domain containing protein, putative                                                                      |
| LmxM.25.0580        | hypothetical protein, conserved                                                                                  |
| LmxM.25.0730        | eukaryotic initiation factor 5a, putative                                                                        |
| LmxM.25.0820        | prefoldin subunit, putative                                                                                      |
| LmxM.25.0960        | tubulin gamma chain                                                                                              |
| LmxM.25.1010        | 2OG-Fe(II) oxygenase superfamily, putative                                                                       |
| LmxM.25.1020        | dehydrogenase-like protein                                                                                       |
| LmxM.25.1100        | DNAJ-like protein                                                                                                |

|               |                                                               |
|---------------|---------------------------------------------------------------|
| LmxM.25.1270  | hypothetical protein, conserved                               |
| LmxM.25.1310  | hypothetical protein, conserved                               |
| LmxM.25.1320  | serine/threonine-protein phosphatase                          |
| LmxM.25.1430  | Putative intraflagellar transport protein A1                  |
| LmxM.25.1570  | ER-golgi trafficking TRAPP I complex 85 kDa subunit, putative |
| LmxM.25.1630  | diacylglycerol acyltransferase, putative                      |
| LmxM.25.1660  | hypothetical protein, conserved                               |
| LmxM.25.1720  | hypothetical protein, conserved                               |
| LmxM.25.1920  | tetratricopeptide repeat protein 29                           |
| LmxM.25.2040  | hypothetical protein, conserved                               |
| LmxM.25.2060  | Stage II sporulation protein E (SpoIIE), putative             |
| LmxM.25.2080  | elongation factor 2-like protein                              |
| LmxM.25.2110  | KIF-1 binding protein C terminal, putative                    |
| LmxM.25.2120  | eukaryotic translation initiation factor 3 subunit j          |
| LmxM.25.2140  | succinyl-CoA synthetase alpha subunit, putative               |
| LmxM.25.2190  | DnaJ domain/Zinc-finger double-stranded RNA-binding, putative |
| LmxM.25.2370  | adenylate kinase, putative                                    |
| LmxM.26.0010a | hypothetical protein                                          |
| LmxM.26.0180  | 60S ribosomal protein L7, putative                            |
| LmxM.26.0200  | hypothetical protein, conserved                               |
| LmxM.26.0440  | hypothetical protein, conserved                               |
| LmxM.26.0630  | hypothetical protein, conserved                               |
| LmxM.26.0640  | 10 kDa heat shock protein, putative                           |
| LmxM.26.0730  | hypothetical protein, conserved                               |
| LmxM.26.0840  | hypothetical protein, conserved                               |
| LmxM.26.0870  | ISWI complex protein                                          |
| LmxM.26.0890  | 40S ribosomal protein S16, putative                           |
| LmxM.26.0940  | DnaJ domain/Domain of unknown function (DUF3395), putative    |
| LmxM.26.0970  | NMD3 family, putative                                         |
| LmxM.26.0980  | protein kinase, putative                                      |
| LmxM.26.1010  | hypothetical protein, conserved                               |
| LmxM.26.1030  | hypothetical protein, conserved                               |
| LmxM.26.1120  | axonemal dynein light chain, putative                         |
| LmxM.26.1220  | hypothetical protein, conserved                               |
| LmxM.26.1250  | hypothetical protein, conserved                               |
| LmxM.26.1300  | Nucleolar protein 105, putative                               |
| LmxM.26.1310  | hypothetical protein, conserved                               |
| LmxM.26.1420  | FYVE zinc finger, putative                                    |
| LmxM.26.1540  | glutaredoxin, putative                                        |
| LmxM.26.1620  | CDP-DAG synthase, putative                                    |
| LmxM.26.1640  | 40S ribosomal protein S33, putative                           |
| LmxM.26.1750  | hypothetical protein, conserved                               |
| LmxM.26.1860  | Present in the outer mitochondrial membrane proteome 2        |
| LmxM.26.1950  | microtubule-associated protein, putative                      |
| LmxM.26.1980  | hypothetical protein, conserved                               |
| LmxM.26.2010  | hypothetical protein, conserved                               |
| LmxM.26.2030  | hypothetical protein, conserved                               |
| LmxM.26.2200  | hypothetical protein, conserved                               |
| LmxM.26.2220  | ribosomal protein L38, putative                               |
| LmxM.26.2230  | GDP-mannose 4,6 dehydratase, putative                         |
| LmxM.26.2280  | nitrilase, putative                                           |
| LmxM.26.2300  | hypothetical protein, conserved                               |
| LmxM.26.2320  | hypothetical protein, conserved                               |
| LmxM.26.2360  | sec1 family transport protein, putative                       |
| LmxM.26.2370  | SPRY domain/HECT-domain (ubiquitin-transferase), putative     |
| LmxM.26.2380  | Fibronectin type III domain containing protein, putative      |
| LmxM.26.2410  | hypothetical protein, conserved                               |
| LmxM.26.2480  | phosphatidyltransferase, putative                             |
| LmxM.26.2490  | hypothetical protein, conserved                               |
| LmxM.26.2520  | hypothetical protein, conserved                               |
| LmxM.26.2590  | Paraquat-inducible protein A, putative                        |
| LmxM.26.2600  | hypothetical protein, conserved                               |
| LmxM.27.0090  | cytochrome p450-like protein                                  |
| LmxM.27.0200  | hypothetical protein, conserved                               |

LmxM.27.0310 TATA-binding protein interacting (TIP20), putative  
 LmxM.27.0380 Nuclear pore complex protein 158  
 LmxM.27.0530 hypothetical protein, conserved  
 LmxM.27.0550 replication factor C, subunit 4, putative  
 LmxM.27.0580 hypothetical protein, conserved  
 LmxM.27.0590 Domain of unknown function (DUF4470)/Domain of unknown function (DUF4471), putative  
 LmxM.27.0630 Mitochondrial SSU ribosomal protein, putative  
 LmxM.27.0700 hypothetical protein, conserved  
 LmxM.27.0820 parallel beta-helix repeat, putative  
 LmxM.27.0860 WD domain, G-beta repeat, putative  
 LmxM.27.0910 Pep3/Vps18/deep orange family/Region in Clathrin and VPS, putative  
 LmxM.27.1050 vesicular transport protein (CDC48 homologue), putative  
 LmxM.27.1070 vesicular-fusion ATPase-like protein, putative  
 LmxM.27.1130 intraflagellar transport protein 88, putative  
 LmxM.27.1190 histone H1, putative  
 LmxM.27.1210 translation initiation factor eIF2B delta subunit, putative  
 LmxM.27.1230 hypothetical protein, conserved  
 LmxM.27.1240 histone H1, putative  
 LmxM.27.1290 predicted leucine-rich repeat protein  
 LmxM.27.1390 hypothetical protein  
 LmxM.27.1440 Snf7, putative  
 LmxM.27.1480 cyclic nucleotide-binding domain containing protein, putative  
 LmxM.27.1490 hypothetical protein, conserved  
 LmxM.27.1630 inner dynein arm I1 intermediate chain, axonemal  
 LmxM.27.1690 mRNA export factor MEX67  
 LmxM.27.1750 dynein heavy chain, putative  
 LmxM.27.1760 Tubulin cofactor C domain-containing protein 1, putative  
 LmxM.27.1790 hypothetical protein, conserved  
 LmxM.27.1810 Phosphoenolpyruvate carboxykinase [ATP], glycosomal  
 LmxM.27.1830 GTP binding protein, putative  
 LmxM.27.1850 paraflagellar rod protein 5, putative  
 LmxM.27.1895 hypothetical protein, conserved  
 LmxM.27.1930 hypothetical protein, unknown function  
 LmxM.27.1940 cdc2-related kinase 9  
 LmxM.27.1950 hypothetical protein, conserved  
 LmxM.27.1990 Rab-GTPase-TBC domain containing protein, putative  
 LmxM.27.2031 branched-chain amino acid aminotransferase, putative  
 LmxM.27.2032 branched-chain amino acid aminotransferase, putative  
 LmxM.27.2050 ribonucleoside-diphosphate reductase small chain, putative  
 LmxM.27.2060 hypothetical protein, conserved  
 LmxM.27.2130 hypothetical protein, conserved  
 LmxM.27.2170 hypothetical protein, conserved  
 LmxM.27.2200 thioredoxin, putative  
 LmxM.27.2220 ribosomal protein L11, putative  
 LmxM.27.2250 EMG1/NEP1 methyltransferase, putative  
 LmxM.27.2470 protein kinase, putative  
 LmxM.27.2600 hypothetical protein, conserved  
 LmxM.28.0050 nexin-dynein regulatory complex 2  
 LmxM.28.0060 hypothetical protein, conserved  
 LmxM.28.0160 RNA binding protein, putative  
 LmxM.28.0240 glycerol-3-phosphate dehydrogenase, putative  
 LmxM.28.0330 rrp44p homologue, putative  
 LmxM.28.0400 serine peptidase, Clan SJ, family S16, putative  
 LmxM.28.0450 DIS3-like exonuclease, putative  
 LmxM.28.0470 hypothetical protein, conserved  
 LmxM.28.0510 hypothetical protein, conserved  
 LmxM.28.0530 RAD50 DNA repair-like protein  
 LmxM.28.0550 DNA repair protein RAD51, putative  
 LmxM.28.0590 hypothetical protein, unknown function  
 LmxM.28.0610 dynein heavy chain, putative  
 LmxM.28.0680 Ankyrin repeats (3 copies), putative  
 LmxM.28.0720 Sas10/Utp3/C1D family/Sas10 C-terminal domain containing protein, putative  
 LmxM.28.0760 DNA repair protein, putative  
 LmxM.28.0780 kinetoplast poly(A) polymerase 1

|               |                                                                                             |
|---------------|---------------------------------------------------------------------------------------------|
| LmxM.28.0850  | minichromosome maintenance (MCM) complex subunit, putative                                  |
| LmxM.28.0870  | hypothetical protein, conserved                                                             |
| LmxM.28.0950  | Tctex-1 family, putative                                                                    |
| LmxM.28.1011  | ribosomal protein S20, putative                                                             |
| LmxM.28.1030  | ribosomal protein S20, putative                                                             |
| LmxM.28.1040  | hypothetical protein, unknown function                                                      |
| LmxM.28.1190  | copine i-like protein                                                                       |
| LmxM.28.1220  | hypothetical protein, conserved                                                             |
| LmxM.28.1240  | p450 reductase, putative                                                                    |
| LmxM.28.1280  | phenylalanine-4-hydroxylase, putative                                                       |
| LmxM.28.1310  | ATP-dependent RNA helicase, putative                                                        |
| LmxM.28.1350  | haloacid dehalogenase-like hydrolase-like protein                                           |
| LmxM.28.1360  | haloacid dehalogenase-like hydrolase-like protein                                           |
| LmxM.28.1380  | haloacid dehalogenase-like hydrolase-like protein                                           |
| LmxM.28.1530  | DEAD box RNA helicase, putative                                                             |
| LmxM.28.1630  | Domain of unknown function (DUF3342), putative                                              |
| LmxM.28.1640  | hypothetical protein, conserved                                                             |
| LmxM.28.1660  | hypothetical protein, conserved                                                             |
| LmxM.28.1800  | hypothetical protein, conserved                                                             |
| LmxM.28.1910  | p21-C-terminal region-binding protein, putative                                             |
| LmxM.28.1930  | Zinc transporter 3, putative                                                                |
| LmxM.28.1940  | divalent cation transporter, putative                                                       |
| LmxM.28.1980  | hypothetical protein, conserved                                                             |
| LmxM.28.2040  | DPCD protein family, putative                                                               |
| LmxM.28.2070  | tRNA threonylcarbamoyl adenosine modification protein, Sua5/YciO/YrdC/YwIC family, putative |
| LmxM.28.2120  | cullin 2, putative                                                                          |
| LmxM.28.2160  | methyltransferase domain containing protein, putative                                       |
| LmxM.28.2180  | hypothetical protein, conserved                                                             |
| LmxM.28.2200  | Mannosyl oligosaccharide glucosidase, putative                                              |
| LmxM.28.2280  | DNA topoisomerase ii                                                                        |
| LmxM.28.2290  | Translation initiation factor eIF-2B subunit epsilon, putative                              |
| LmxM.28.2330  | Cactus-binding C-terminus of cactin protein, putative                                       |
| LmxM.28.2440  | hypothetical protein, conserved                                                             |
| LmxM.28.2470  | MRP protein-like protein                                                                    |
| LmxM.28.2500  | Eukaryotic translation initiation factor 4E-3                                               |
| LmxM.28.2520  | R3H domain containing protein, putative                                                     |
| LmxM.28.2540  | hypothetical protein, conserved                                                             |
| LmxM.28.2560  | 40S ribosomal protein S17, putative                                                         |
| LmxM.28.2570  | splicing factor 3B subunit 1, putative                                                      |
| LmxM.28.2580  | leucine-rich repeat protein, putative                                                       |
| LmxM.28.2590  | ADP-ribosylglycohydrolase, putative                                                         |
| LmxM.28.2670  | protein phosphatase 4 catalytic subunit, putative                                           |
| LmxM.28.2730  | hypothetical protein, conserved                                                             |
| LmxM.28.2740a | hypothetical protein                                                                        |
| LmxM.28.2760  | gamma-tubulin complex component 3                                                           |
| LmxM.28.2880  | dynein heavy chain, putative                                                                |
| LmxM.29.0020  | cyclophilin, putative                                                                       |
| LmxM.29.0050  | MATH domain containing protein, putative                                                    |
| LmxM.29.0200  | hypothetical protein, conserved                                                             |
| LmxM.29.0210  | ribosomal RNA adenine dimethylase family protein, putative                                  |
| LmxM.29.0250  | <b>DUB13</b> ; ubiquitin hydrolase, putative                                                |
| LmxM.29.0410  | WD-40 repeat protein                                                                        |
| LmxM.29.0450  | Eukaryotic translation initiation factor 4E-4                                               |
| LmxM.29.0470  | hypothetical protein, conserved                                                             |
| LmxM.29.0520  | N-acetyltransferase B complex (NatB) non catalytic subunit, putative                        |
| LmxM.29.0590  | Bardet-Biedl syndrome 2 protein                                                             |
| LmxM.29.0620  | ribosome biogenesis regulatory protein (RRS1), putative                                     |
| LmxM.29.0650  | hypothetical protein, conserved                                                             |
| LmxM.29.0700  | NUDC-like protein                                                                           |
| LmxM.29.0800  | rac serine-threonine kinase, putative                                                       |
| LmxM.29.0805  | hypothetical protein, conserved                                                             |
| LmxM.29.0810  | AdoMet dependent proline di-methyltransferase, putative                                     |
| LmxM.29.0860  | surface protein amastin, putative                                                           |
| LmxM.29.0930  | hypothetical protein, conserved                                                             |

LmxM.29.1000 protein kinase, putative  
LmxM.29.1010 ubiquitin fusion degradation protein 2, putative  
LmxM.29.1070 Flavinator of succinate dehydrogenase, putative  
LmxM.29.1100 DREV methyltransferase, putative  
LmxM.29.1205 small nuclear ribonucleoprotein polypeptide e, putative  
LmxM.29.1230 Zinc finger, C3HC4 type (RING finger), putative  
LmxM.29.1240 calcium-binding protein, putative  
LmxM.29.1270 hypothetical protein, conserved  
LmxM.29.1360 serine/threonine protein kinase RIO2, putative  
LmxM.29.1450 kinesin, putative  
LmxM.29.1590 hypothetical protein, conserved  
LmxM.29.1710 small GTP-binding protein Rab28, putative  
LmxM.29.1730 hypothetical protein, conserved  
LmxM.29.1760 microtubule associated protein xmap215  
LmxM.29.1800 queuine tRNA-ribosyltransferase, putative  
LmxM.29.1810 Hydin, putative  
LmxM.29.1830 splicing factor 3a, putative  
LmxM.29.1890 Adenylate kinase, nuclear  
LmxM.29.2070 Domain of unknown function (DUF814), putative  
LmxM.29.2090 alcohol dehydrogenase, putative  
LmxM.29.2100 hypothetical protein, conserved  
LmxM.29.2250 zinc-finger protein, conserved  
LmxM.29.2310 hypothetical protein, conserved  
LmxM.29.2390 hypothetical protein, conserved  
LmxM.29.2460 heat shock 70-related protein 1, mitochondrial precursor, putative  
LmxM.29.2560 hypothetical protein, conserved  
LmxM.29.2570 hypothetical protein, conserved  
LmxM.29.2630 replication factor C, subunit 2, putative  
LmxM.29.2660 hypothetical protein, conserved  
LmxM.29.2670 hypothetical protein, conserved  
LmxM.29.2750 hypothetical protein, conserved  
LmxM.29.2845 succinate dehydrogenase subunit 3  
LmxM.29.2890 hypothetical protein, conserved  
LmxM.29.3015 Lsm5p, putative  
LmxM.29.3060 kinesin, putative  
LmxM.29.3080 homoserine kinase  
LmxM.29.3170 Tumour suppressor, Mitostatin, putative  
LmxM.29.3200 ribosomal protein S26, putative  
LmxM.29.3220 hypothetical protein, conserved  
LmxM.29.3250 ATP-dependent RNA helicase, putative  
LmxM.29.3260 Ankyrin repeats (3 copies), putative  
LmxM.29.3340 60S ribosomal protein L9, putative  
LmxM.29.3390 CAS/CSE/importin domain protein, putative  
LmxM.29.3410 hypothetical protein, conserved  
LmxM.29.3420 T-complex protein 11, putative  
LmxM.29.3450 hypothetical protein, conserved  
LmxM.29.3590 40S ribosomal protein S14  
LmxM.29.3640 Component of motile flagella protein 46  
LmxM.29.3710 CPSF-domain protein, putative  
LmxM.29.3730 60S acidic ribosomal protein P2, putative  
LmxM.30.0090 hypothetical protein, conserved  
LmxM.30.0130 hypothetical protein, unknown function  
LmxM.30.0160 DNA-directed RNA polymerase II subunit 2, putative  
LmxM.30.0200 hypothetical protein, conserved  
LmxM.30.0210 hypothetical protein, conserved  
LmxM.30.0211 hypothetical protein, conserved  
LmxM.30.0230 hypothetical protein, conserved  
LmxM.30.0480 hypothetical protein, conserved  
LmxM.30.0480b hypothetical protein  
LmxM.30.0540 ATP-binding cassette protein subfamily D, member 2, putative  
LmxM.30.0550 hypothetical protein, conserved  
LmxM.30.0700 metallo-peptidase, Clan MA(E), Family M41  
LmxM.30.0720 major facilitator superfamily, putative  
LmxM.30.0740 Tir chaperone protein (CesT) family, putative

LmxM.30.0950 hypothetical protein  
LmxM.30.0980 hypothetical protein, conserved  
LmxM.30.1000 hypothetical protein, conserved  
LmxM.30.1100 Domain of unknown function (DUF4498), putative  
LmxM.30.1210 Protein of unknown function (DUF3638)/Protein of unknown function (DUF3645)/Zn-finger in Ran binding protei  
LmxM.30.1250 hypothetical protein, conserved  
LmxM.30.1270 p-glycoprotein e  
LmxM.30.1370 hypothetical protein, conserved  
LmxM.30.1380 hypothetical protein, unknown function  
LmxM.30.1400 hypothetical protein, conserved  
LmxM.30.1610 diphthine synthase-like protein  
LmxM.30.1720 Cullin protein neddylation domain containing protein, putative  
LmxM.30.1870 mannosyltransferase-like protein  
LmxM.30.1880 mannosyltransferase-like protein  
LmxM.30.1885 mannosyltransferase-like protein  
LmxM.30.1930 dihydrouridine synthase (Dus), putative  
LmxM.30.1970 tryparedoxin 4, putative  
LmxM.30.2030 ubiquitin-fusion protein  
LmxM.30.2170 ARM-like helical domain-containing protein  
LmxM.30.2270 hypothetical protein, conserved  
LmxM.30.2310 3'-nucleotidase/nuclease  
LmxM.30.2590 TerD domain containing protein, putative  
LmxM.30.2700 hypothetical protein, conserved  
LmxM.30.2770 RNA recognition motif. (a.k.a. RRM, RBD, or RNP domain), putative  
LmxM.30.2780 hypothetical protein, unknown function  
LmxM.30.2890 Region in Clathrin and VPS, putative  
LmxM.30.2900 Nucleoporin NUP62  
LmxM.30.2940 farnesyltransferase, putative  
LmxM.30.2990 hypothetical protein, conserved  
LmxM.30.3060 ferrous iron transport protein  
LmxM.30.3070 ferrous iron transport protein  
LmxM.30.3140 hypothetical protein, conserved  
LmxM.30.3150 Cilia and flagella associated protein 43, putative  
LmxM.30.3180 histone H4  
LmxM.31.0070 syntaxin 5, putative  
LmxM.31.0130 hypothetical protein, conserved  
LmxM.31.0140 Flagellum attachment zone protein 9  
LmxM.31.0150 Utp14 protein, putative  
LmxM.31.0160 hypothetical protein, unknown function  
LmxM.31.0190 hypothetical protein, conserved  
LmxM.31.0200 hypothetical protein, conserved  
LmxM.31.0210 Histone chaperone Rtp106-like, putative  
LmxM.31.0250 hypothetical protein, conserved  
LmxM.31.0310 intraflagellar transport protein 140, putative  
LmxM.31.0370 root hair defective 3 GTP-binding protein (RHD3), putative  
LmxM.31.0410 hypothetical protein, conserved  
LmxM.31.0430 60S ribosomal protein L17, putative  
LmxM.31.0450 40S ribosomal protein S2  
LmxM.31.0460 prostaglandin f synthase, putative  
LmxM.31.0470 hypothetical protein, conserved  
LmxM.31.0570 ATP- dependent RNA helicase, putative  
LmxM.31.0600 hypothetical protein, conserved  
LmxM.31.0620 hypothetical protein, conserved  
LmxM.31.0690 hypothetical protein, conserved  
LmxM.31.0820 CYC2-like cyclin, putative  
LmxM.31.0850 polypyrimidine tract-binding protein, putative  
LmxM.31.0890 ethanolamine-phosphate cytidyltransferase  
LmxM.31.0910 Alpha/beta hydrolase family, putative  
LmxM.31.0930 FAD dependent oxidoreductase, putative  
LmxM.31.0960 ubiquitin-conjugating enzyme protein, putative  
LmxM.31.0970 cysteine peptidase, Clan CA, family C2, putative  
LmxM.31.1070 small nuclear ribonucleoprotein, putative  
LmxM.31.1090 HECT-domain (ubiquitin-transferase), putative  
LmxM.31.1100 exportin 1, putative

|                     |                                                                                                           |
|---------------------|-----------------------------------------------------------------------------------------------------------|
| LmxM.31.1130        | hypothetical protein, conserved                                                                           |
| LmxM.31.1210        | pentatricopeptide repeat domain containing protein, putative                                              |
| LmxM.31.1220        | hypothetical protein, conserved                                                                           |
| LmxM.31.1230        | ADP-ribosylation factor GTPase activating protein 1, putative                                             |
| LmxM.31.1340        | cleavage and polyadenylation specificity factor- like protein                                             |
| LmxM.31.1360        | RNA capping enzyme, cytoplasmic                                                                           |
| LmxM.31.1370        | G5-interacting protein, putative                                                                          |
| LmxM.31.1430        | hypothetical protein, conserved                                                                           |
| LmxM.31.1610        | hypothetical protein, conserved                                                                           |
| LmxM.31.1680        | Paraflagellar Rod Proteome Component 9, putative                                                          |
| LmxM.31.1690        | protein phosphatase 2C, putative                                                                          |
| LmxM.31.1802        | hypothetical protein, conserved                                                                           |
| LmxM.31.1810        | protein kinase, putative                                                                                  |
| LmxM.31.1840        | rab11B GTPase, putative                                                                                   |
| LmxM.31.1870        | Cation efflux family, putative                                                                            |
| LmxM.31.2000        | TLR4 regulator and MIR-interacting MSAP, putative                                                         |
| LmxM.31.2030        | Ras-related protein RAB2B, putative                                                                       |
| LmxM.31.2060        | ABC transporter-like protein                                                                              |
| LmxM.31.2130        | RNA recognition motif. (a.k.a. RRM, RBD, or RNP domain), putative                                         |
| LmxM.31.2160        | R-SNARE protein, putative                                                                                 |
| LmxM.31.2200        | U5 small nuclear ribonucleoprotein component, putative                                                    |
| LmxM.31.2230        | ATP-dependent RNA helicase, putative                                                                      |
| LmxM.31.2340        | cytochrome-b5 reductase, putative                                                                         |
| LmxM.31.2350        | Nucleoporin NUP53a                                                                                        |
| LmxM.31.2530        | cyclic nucleotide-binding domain containing protein, putative                                             |
| LmxM.31.2550        | adenosine monophosphate deaminase-like protein                                                            |
| LmxM.31.2610        | Tip Of Extending FAZ protein 1                                                                            |
| LmxM.31.2650        | SpoU rRNA Methylase family, putative                                                                      |
| LmxM.31.2670        | kinteoplast poly(A) polymerase complex 1 subunit, putative                                                |
| LmxM.31.2730        | hypothetical protein, conserved                                                                           |
| LmxM.31.2750        | Guanine nucleotide exchange factor in Golgi transport N-terminal/Sec7 domain containing protein, putative |
| LmxM.31.2890        | SNAP protein, putative                                                                                    |
| <b>LmxM.31.2910</b> | <b>DUB19; ubiquitin hydrolase, putative</b>                                                               |
| LmxM.31.2951        | nucleoside diphosphate kinase b                                                                           |
| LmxM.31.3030        | chaperone protein DnaJ, putative                                                                          |
| LmxM.31.3040        | protein phosphatase 2A catalytic subunit, putative                                                        |
| LmxM.31.3180        | mitochondrial RNA binding protein, putative                                                               |
| LmxM.31.3300        | chaperone protein DnaJ, putative                                                                          |
| LmxM.31.3340        | hypothetical protein, conserved                                                                           |
| LmxM.31.3380        | tRNA pseudouridine synthase D (TruD), putative                                                            |
| LmxM.31.3410        | Dopey, N-terminal, putative                                                                               |
| LmxM.31.3430        | Uncharacterised protein family UPF0564, putative                                                          |
| LmxM.31.3431        | Uncharacterised protein family UPF0564, putative                                                          |
| LmxM.31.3650        | hypothetical protein                                                                                      |
| LmxM.31.3680        | enoyl-CoA hydratase/isomerase family protein, putative                                                    |
| LmxM.31.3760        | enolase, putative                                                                                         |
| LmxM.31.3800        | hypothetical protein, conserved                                                                           |
| LmxM.31.3810        | SHQ1 protein, putative                                                                                    |
| LmxM.31.3930        | SPRY domain/HECT-domain (ubiquitin-transferase), putative                                                 |
| LmxM.31.3990        | GIPL galf transferase, putative                                                                           |
| LmxM.32.0060        | WD domain, G-beta repeat, putative                                                                        |
| LmxM.32.0150        | hypothetical protein, conserved                                                                           |
| LmxM.32.0190        | hypothetical protein, conserved                                                                           |
| LmxM.32.0270        | Mpv17 / PMP22 family, putative                                                                            |
| LmxM.32.0280        | hypothetical protein, conserved                                                                           |
| LmxM.32.0295        | autophagocytosis protein, putative                                                                        |
| LmxM.32.0314        | heat shock protein 83-1                                                                                   |
| LmxM.32.0316        | heat shock protein 83-1                                                                                   |
| LmxM.32.0410        | DNA mismatch repair protein MSH2, putative                                                                |
| LmxM.32.0535        | hypothetical protein, conserved                                                                           |
| LmxM.32.0550        | hypothetical protein, conserved                                                                           |
| LmxM.32.0650        | hypothetical protein, conserved                                                                           |
| LmxM.32.0720        | 60S ribosomal protein L6, putative                                                                        |
| LmxM.32.0765        | hypothetical protein, conserved                                                                           |

LmxM.32.0920 40S ribosomal protein S3, putative  
LmxM.32.0960 nicotinate phosphoribosyltransferase, putative  
LmxM.32.0970 hypothetical protein, conserved  
LmxM.32.1030 Protein prenyltransferase alpha subunit repeat, putative  
LmxM.32.1090 guanylate kinase, putative  
LmxM.32.1140 hypothetical protein, conserved  
LmxM.32.1170 hypothetical protein, conserved  
LmxM.32.1180 Axonemal inner arm dynein light chain, putative  
LmxM.32.1200 ATPase family associated with various cellular activities (AAA), putative  
LmxM.32.1300 ABC1 family protein, putative  
LmxM.32.1490 hypothetical protein, conserved  
LmxM.32.1500 hypothetical protein, conserved  
LmxM.32.1620 hypothetical protein, conserved  
LmxM.32.1680 thiamine biosynthesis-like protein  
LmxM.32.1700 chromatin-remodeling complex atpase chain iswi  
LmxM.32.1780 hypothetical protein, conserved  
LmxM.32.1790 Histone methylation protein DOT1, putative  
LmxM.32.1810 hypothetical protein, conserved  
LmxM.32.1860 ABC transporter, putative  
LmxM.32.1910 ribosome assembly protein RRB1, putative  
LmxM.32.1930 phosphoribosylpyrophosphate synthetase, putative  
LmxM.32.1970 mitochondrial  
LmxM.32.2040 Nucleoporin NUP89  
LmxM.32.2050 hypothetical protein, conserved  
LmxM.32.2060 hypothetical protein, conserved  
LmxM.32.2070 mitogen-activated protein kinase, putative  
LmxM.32.2140 kinesin, putative  
LmxM.32.2150 hypothetical protein, conserved  
LmxM.32.2200 hypothetical protein, unknown function  
LmxM.32.2220 Flagella-associated protein 91, putative  
LmxM.32.2370 Nucleoporin NUP59  
LmxM.32.2400 GTPase protein, putative  
LmxM.32.2510 Mitochondrial SSU ribosomal protein, putative  
LmxM.32.2530 NUC173 domain containing protein, putative  
LmxM.32.2610 Mitochondrial-processing peptidase subunit alpha  
LmxM.32.2630 dynein intermediate chain, putative  
LmxM.32.2700 minichromosome maintenance (MCM) complex subunit, putative  
LmxM.32.2960 hypothetical protein, conserved  
LmxM.32.3050 tyrosyl-DNA phosphodiesterase-like protein  
LmxM.32.3070partial hypothetical protein  
LmxM.32.3090 Holliday-junction resolvase-like of SPT6/SH2 domain containing protein, putative  
LmxM.32.3150 40S ribosomal protein S13, putative  
LmxM.32.3160 hypothetical protein, conserved  
LmxM.33.0130 malate dehydrogenase, putative  
LmxM.33.0150 malate dehydrogenase, putative  
LmxM.33.0160 malate dehydrogenase, putative  
LmxM.33.0190 Domain of unknown function (DUF1935), putative  
LmxM.33.0250 hypothetical protein, conserved  
LmxM.33.0300 hypothetical protein, conserved  
LmxM.33.0340 ATPase family associated with various cellular activities (AAA), putative  
LmxM.33.0540 Gamma-soluble NSF attachment protein (SNAP-gamma) (N-ethylmaleimide-sensitive factor attachment protein,  
LmxM.33.0560 hypothetical protein, conserved  
LmxM.33.0590 nuclear cap binding complex subunit CBP110, putative  
LmxM.33.0610 enoyl-[acyl-carrier-protein] reductase, putative  
LmxM.33.0660 hypothetical protein, unknown function  
LmxM.33.0670 ABC transporter-like protein  
LmxM.33.0680 Flagellar attachment zone protein 1, putative  
LmxM.33.0720 hypothetical protein, conserved  
LmxM.33.0815 Transcription factor Pcc1, putative  
LmxM.33.0840 translation elongation factor 1-beta, putative  
LmxM.33.0860 60S ribosomal protein L13a, putative  
LmxM.33.0920 hypothetical protein, conserved  
LmxM.33.1000 myosin IB heavy chain, putative  
LmxM.33.1050 TPR repeat/SET domain containing protein, putative



LmxM.33.1060 mitochondrial ATP-dependent zinc metallopeptidase, putative  
LmxM.33.1110 Shwachman-Bodian-Diamond syndrome (SBDS) protein/SBDS protein C-terminal domain containing protein, putative  
LmxM.33.1240 3'-5' exonuclease, putative  
LmxM.33.1250 NLI-interacting factor, putative  
LmxM.33.1330 BCS1 N terminal/ATPase family associated with various cellular activities (AAA), putative  
LmxM.33.1360 Nucleoporin NUP225  
LmxM.33.1440 hypothetical protein, conserved  
LmxM.33.2030 hypothetical protein, conserved  
LmxM.33.2050 ATP-dependent RNA helicase, putative  
LmxM.33.2090 protein kinase, putative  
LmxM.33.2220 Endonuclease/Exonuclease/phosphatase family, putative  
LmxM.33.2240 Glycosyl hydrolase family 65 central catalytic domain/Glycosyl hydrolase family 65, C-terminal domain containing  
LmxM.33.2360 hypothetical protein, conserved  
LmxM.33.2480 Component of motile flagella 8, putative  
LmxM.33.2520 Guanine nucleotide exchange factor in Golgi transport N-terminal/Sec7 domain/Domain of unknown function (D  
LmxM.33.2650 Domain of unknown function DUF21, putative  
LmxM.33.2780 40S ribosomal protein S19 protein, putative  
LmxM.33.2790 hypothetical protein, conserved  
LmxM.33.2870 ribosomal protein L3, putative  
LmxM.33.2900 ribosomal protein L3, putative  
LmxM.33.2980 Nucleoside diphosphate kinase 3  
LmxM.33.3030 Retinal Maintenance, putative  
LmxM.33.3040 hypothetical protein, conserved  
LmxM.33.3080 exosome subunit rrp6p homologue, putative  
LmxM.33.3100 hypothetical protein, conserved  
LmxM.33.3110 AAA domain containing protein, putative  
LmxM.33.3230 hypothetical protein, conserved  
LmxM.33.3420 metallo-beta-lactamase superfamily, putative  
LmxM.33.3430 cleavage and polyadenylation specificity factor, putative  
LmxM.33.3460 hypothetical protein, conserved  
LmxM.33.3520 peroxisome biosynthesis protein-like protein  
LmxM.33.3530 hypothetical protein, conserved  
LmxM.33.3570 hypothetical protein, conserved  
LmxM.33.3600 adenosine kinase-like protein  
LmxM.33.3650 60S ribosomal protein L21, putative  
LmxM.33.3710 hypothetical protein, conserved  
LmxM.33.3780 phosphomannomutase-like protein  
LmxM.33.3860 small nuclear ribonucleoprotein sm d3  
LmxM.33.3940 target of rapamycin kinase 3, putative  
LmxM.33.3960 HECT-domain (ubiquitin-transferase), putative  
LmxM.33.4070 hypothetical protein, conserved  
LmxM.33.4080 DnaJ domain containing protein, putative  
LmxM.33.4160 dynein heavy chain, putative  
LmxM.33.4190 protein serine/threonine phosphatase, putative  
LmxM.33.4200 hypothetical protein, unknown function  
LmxM.33.4270 Cullin binding, putative  
LmxM.33.4290 nucleolar protein family a, putative  
LmxM.33.4530 Phosphatidylinositol 3-kinase tor2  
LmxM.33.4580 hypothetical protein, conserved  
LmxM.34.0060 hypothetical protein, conserved  
LmxM.34.0110 coatomer subunit zeta, putative  
LmxM.34.0230 hypothetical protein, conserved  
LmxM.34.0300 hypothetical protein, conserved  
LmxM.34.0350 hypothetical protein, conserved  
LmxM.34.0360 enoyl-CoA hydratase/isomerase family protein, conserved  
LmxM.34.0400a hypothetical protein  
LmxM.34.0400b hypothetical protein  
LmxM.34.0610 hypothetical protein, conserved  
LmxM.34.0670 hypothetical protein, conserved  
LmxM.34.0690 Tetratricopeptide repeat, putative  
LmxM.34.0710 Endonuclease/Exonuclease/phosphatase family, putative  
LmxM.34.0760 AMP-activated protein kinase, gamma regulatory subunit  
LmxM.34.0970 aldose 1-epimerase, putative  
LmxM.34.0990 hypothetical protein, conserved

|                     |                                                                                                   |
|---------------------|---------------------------------------------------------------------------------------------------|
| LmxM.34.1090        | Nucleolar protein 111, putative                                                                   |
| LmxM.34.1110        | Rdx family, putative                                                                              |
| LmxM.34.1150        | oligosaccharyl transferase-like protein                                                           |
| LmxM.34.1200        | pre-mRNA splicing factor ATP-dependent RNA helicase, putative                                     |
| LmxM.34.1210        | Degradation arginine-rich protein for mis-folding, putative                                       |
| LmxM.34.1250        | thioredoxin-like protein                                                                          |
| LmxM.34.1310        | histone H4                                                                                        |
| LmxM.34.1430        | 60S ribosomal protein L2, putative                                                                |
| LmxM.34.1440        | 60S ribosomal protein L2, putative                                                                |
| LmxM.34.1450        | hypothetical protein, conserved                                                                   |
| LmxM.34.1510        | NLI interacting factor-like phosphatase/Zinc finger C-x8-C-x5-C-x3-H type (and similar), putative |
| LmxM.34.1600        | Nucleoporin NUP82                                                                                 |
| LmxM.34.1620        | Concanavalin A-like lectin/glucanases superfamily, putative                                       |
| LmxM.34.1670        | 60S ribosomal protein L26, putative                                                               |
| LmxM.34.1720        | cyclophilin 14, putative                                                                          |
| LmxM.34.1730        | casein kinase II, putative                                                                        |
| <b>LmxM.34.1740</b> | <b>DUB6; ubiquitin hydrolase, putative</b>                                                        |
| LmxM.34.1790        | DNA polymerase epsilon subunit B, putative                                                        |
| LmxM.34.1820        | Eukaryotic rRNA processing protein EBP2, putative                                                 |
| LmxM.34.1890        | 60S ribosomal protein L5, putative                                                                |
| LmxM.34.1900        | 60S ribosomal protein L5, putative                                                                |
| LmxM.34.1920        | 60S ribosomal protein L36, putative                                                               |
| LmxM.34.1970        | ubx domain containing protein, putative                                                           |
| LmxM.34.1980        | hypothetical protein, conserved                                                                   |
| LmxM.34.1990        | U3 small nucleolar RNA-associated protein 6, putative                                             |
| LmxM.34.2010        | 40S ribosomal protein S6, putative                                                                |
| LmxM.34.2040        | ankyrin repeat protein, putative                                                                  |
| LmxM.34.2110        | hypothetical protein, conserved                                                                   |
| LmxM.34.2120        | R-SNARE protein, putative                                                                         |
| LmxM.34.2190        | 60S ribosomal protein L12, putative                                                               |
| LmxM.34.2220        | kinetoplastid membrane protein-11                                                                 |
| LmxM.34.2221        | kinetoplastid membrane protein-11                                                                 |
| LmxM.34.2300        | hypothetical protein, conserved                                                                   |
| LmxM.34.2320        | protein kinase, putative                                                                          |
| LmxM.34.2330        | Importin 1                                                                                        |
| LmxM.34.2380        | hypothetical protein, unknown function                                                            |
| LmxM.34.2550        | Double RNA binding domain protein 9                                                               |
| LmxM.34.2725        | hypothetical protein, conserved                                                                   |
| LmxM.34.2770        | hypothetical protein, conserved                                                                   |
| LmxM.34.2800        | Alpha/beta hydrolase family, putative                                                             |
| LmxM.34.2850        | RNA polymerase-associated protein LEO1, putative                                                  |
| LmxM.34.2890        | SpoU rRNA Methylase family, putative                                                              |
| LmxM.34.2970        | hypothetical protein, conserved                                                                   |
| LmxM.34.3160        | riboflavin kinase/fmn adenylyltransferase-like protein                                            |
| LmxM.34.3210        | EF-hand domain pair, putative                                                                     |
| LmxM.34.3240        | hypothetical protein, conserved                                                                   |
| LmxM.34.3250        | replication factor C, subunit 3, putative                                                         |
| LmxM.34.3260        | Peroxin 19                                                                                        |
| LmxM.34.3290        | 60S ribosomal subunit protein L31, putative                                                       |
| LmxM.34.3360        | Putative death-receptor fusion protein (DUF2428), putative                                        |
| LmxM.34.3380        | poly A polymerase regulatory subunit, putative                                                    |
| LmxM.34.3510        | structural maintenance of chromosome (SMC) family protein, putative                               |
| LmxM.34.3540        | pre-rRNA-processing protein PNO1, putative                                                        |
| LmxM.34.3780        | 60S ribosomal protein L27A/L29, putative                                                          |
| LmxM.34.3800        | 60S ribosomal protein L23, putative                                                               |
| LmxM.34.3880        | WD domain, G-beta repeat/Sof1-like domain containing protein, putative                            |
| LmxM.34.3920        | hypothetical protein, conserved                                                                   |
| LmxM.34.3940        | Chromosome passenger complex (CPC) protein INCENP N terminal, putative                            |
| LmxM.34.3950        | U5 snRNA-associated splicing factor                                                               |
| LmxM.34.3980        | 4E-interacting protein, putative                                                                  |
| LmxM.34.4000        | protein kinase, putative                                                                          |
| LmxM.34.4010        | protein kinase A catalytic subunit isoform 1                                                      |
| LmxM.34.4030        | ATP-dependent RNA helicase, putative                                                              |
| LmxM.34.4070        | hypothetical protein, conserved                                                                   |

LmxM.34.4150 hsp70 subfamily B suppressor 1  
 LmxM.34.4160 Protein of unknown function (DUF2009), putative  
 LmxM.34.4510 hypothetical protein, conserved  
 LmxM.34.4550 hypothetical protein, conserved  
 LmxM.34.4590 phosphatidylserine decarboxylase, putative  
 LmxM.34.4670 katanin, putative  
 LmxM.34.4720 glycine cleavage system H protein, putative  
 LmxM.34.4870 hypothetical protein, conserved  
 LmxM.34.5070 hypothetical protein, conserved  
 LmxM.34.5090 hypothetical protein, conserved  
 LmxM.34.5280 Present in the outer mitochondrial membrane proteome 5  
 LmxM.34.5310 GTP-binding protein, putative  
 LmxM.34.5320 SAC3/GANP/Nin1/mts3/eIF-3 p25 family, putative  
 LmxM.34.5390 HECT-domain (ubiquitin-transferase), putative  
 LmxM.36.0020 histone H4  
 LmxM.36.0060 L-ribulokinase, putative  
 LmxM.36.0080 leucine carboxyl methyltransferase, putative  
 LmxM.36.0130 PUB domain containing protein, putative  
 LmxM.36.0210 SET domain protein, putative  
 LmxM.36.0220 dolichyl-phosphate beta-D-mannosyltransferase precursor, conserved  
 LmxM.36.0280 hypothetical protein, conserved  
 LmxM.36.0390 hypothetical protein, conserved  
 LmxM.36.0460 vacuolar protein sorting-associated protein, putative  
 LmxM.36.0500 TPR-repeat-containing chaperone protein DNAJ, putative  
 LmxM.36.0590 Eukaryotic translation initiation factor 4E type 5, putative  
 LmxM.36.0600 ubiquitin/ribosomal protein S27a, putative  
 LmxM.36.0710 Protein C21orf2 homolog, putative  
 LmxM.36.0810 hypothetical protein, conserved  
 LmxM.36.0870 pre-mRNA splicing factor ATP-dependent RNA helicase, putative  
 LmxM.36.0940 40S ribosomal protein S18, putative  
 LmxM.36.1000 intraflagellar transport protein 122, putative  
 LmxM.36.1030 hypothetical protein, conserved  
 LmxM.36.1060 ISWI complex protein  
 LmxM.36.1100 ribosomal protein L24, putative  
 LmxM.36.1170 hypothetical protein, conserved  
 LmxM.36.1180 hypothetical protein, conserved  
 LmxM.36.1240 hypothetical protein, conserved  
 LmxM.36.1250 40S ribosomal protein S9, putative  
 LmxM.36.1400 The ARF-like 2 binding protein BART, putative  
 LmxM.36.1440 N-terminal region of Chorein, a TM vesicle-mediated sorter, putative  
 LmxM.36.1480 hypothetical protein, conserved  
 LmxM.36.1500 hypothetical protein, conserved  
 LmxM.36.1530 protein kinase, putative,serine/threonine protein kinase, putative  
 LmxM.36.1590 STAG domain containing protein, putative  
 LmxM.36.1595 hypothetical protein, conserved  
 LmxM.36.1790 5'-3' exoribonuclease D, putative  
 LmxM.36.1840 DEAD box RNA helicase, putative  
 LmxM.36.1870 hypothetical protein, conserved  
 LmxM.36.1880 CBF/Mak21 family, putative  
 LmxM.36.1910 trypanin, putative  
 LmxM.36.1925 60S ribosomal protein L37a  
 LmxM.36.2000 hypothetical protein, conserved  
 LmxM.36.2130 ATP-dependent RNA helicase DBP2A, putative  
 LmxM.36.2150 transmembrane emp24 domain-containing protein  
 LmxM.36.2170 NOL1/NOP2/sun family, putative  
 LmxM.36.2470 acid phosphatase, putative  
 LmxM.36.2500 chromatin assembly factor 1 subunit b-like protein  
 LmxM.36.2510 Nucleoporin NUP96  
 LmxM.36.2610 folylpolyglutamate synthetase  
 LmxM.36.2680 hypothetical protein, conserved  
 LmxM.36.2710 mitochondrial ATP-dependent zinc metallopeptidase, putative  
 LmxM.36.2720 transportin2-like protein  
 LmxM.36.2790 Flagellar Member 1  
 LmxM.36.2830 pre-mRNA splicing factor ATP-dependent RNA helicase, putative

|              |                                                                                                      |
|--------------|------------------------------------------------------------------------------------------------------|
| LmxM.36.2840 | Flagellar Member 2                                                                                   |
| LmxM.36.2870 | 40S ribosomal protein S24e                                                                           |
| LmxM.36.2880 | hypothetical protein, conserved                                                                      |
| LmxM.36.2980 | predicted bromodomain protein                                                                        |
| LmxM.36.3060 | cullin-like protein                                                                                  |
| LmxM.36.3120 | hypothetical protein, conserved                                                                      |
| LmxM.36.3310 | actin-like protein, putative                                                                         |
| LmxM.36.3360 | Bromodomain, putative                                                                                |
| LmxM.36.3400 | ribosomal protein L29, putative                                                                      |
| LmxM.36.3500 | hypothetical protein, conserved                                                                      |
| LmxM.36.3570 | signal recognition particle receptor like protein, putative                                          |
| LmxM.36.3657 | Protein of unknown function (DUF1619), putative                                                      |
| LmxM.36.3690 | Nucleoporin NUP119                                                                                   |
| LmxM.36.3710 | hypothetical protein, conserved                                                                      |
| LmxM.36.3720 | Protein of unknown function (DUF498/DUF598), putative                                                |
| LmxM.36.3740 | 60S ribosomal protein L34, putative                                                                  |
| LmxM.36.3760 | 60S ribosomal protein L10a, putative                                                                 |
| LmxM.36.3800 | aminomethyltransferase, mitochondrial, putative                                                      |
| LmxM.36.3810 | aminomethyltransferase, mitochondrial, putative                                                      |
| LmxM.36.3850 | Snf7, putative                                                                                       |
| LmxM.36.4010 | hypothetical protein, conserved                                                                      |
| LmxM.36.4110 | hypothetical protein, conserved                                                                      |
| LmxM.36.4210 | WD domain, G-beta repeat/Utp21 specific WD40 associated putative domain containing protein, putative |
| LmxM.36.4270 | Nucleoporin NUP152                                                                                   |
| LmxM.36.4280 | hypothetical protein, conserved                                                                      |
| LmxM.36.4340 | hypothetical protein, unknown function                                                               |
| LmxM.36.4380 | alternative oxidase, putative                                                                        |
| LmxM.36.4400 | ATP-dependent DEAD/H RNA helicase, putative                                                          |
| LmxM.36.4420 | 60S ribosomal protein L22, putative                                                                  |
| LmxM.36.4430 | asparaginase-like protein                                                                            |
| LmxM.36.4440 | hypothetical protein, conserved                                                                      |
| LmxM.36.4510 | 60S ribosomal protein L18, putative                                                                  |
| LmxM.36.4520 | hypothetical protein, conserved                                                                      |
| LmxM.36.4620 | hypothetical protein, conserved                                                                      |
| LmxM.36.4920 | hypothetical protein, conserved                                                                      |
| LmxM.36.4960 | hypothetical protein, unknown function                                                               |
| LmxM.36.5020 | hypothetical protein, conserved                                                                      |
| LmxM.36.5030 | hypothetical protein, conserved                                                                      |
| LmxM.36.5060 | Nin one binding (NOB1) Zn-ribbon like, putative                                                      |
| LmxM.36.5080 | hypothetical protein, conserved                                                                      |
| LmxM.36.5160 | pre-mRNA-splicing factor CWC22, putative                                                             |
| LmxM.36.5240 | glycosyl hydrolase, putative                                                                         |
| LmxM.36.5250 | hypothetical protein, conserved                                                                      |
| LmxM.36.5260 | Adaptor protein complex AP-3 subunit beta-3                                                          |
| LmxM.36.5420 | branch point binding protein, putative                                                               |
| LmxM.36.5470 | hypothetical protein, conserved                                                                      |
| LmxM.36.5670 | RNA helicase, putative                                                                               |
| LmxM.36.5700 | hypothetical protein, conserved                                                                      |
| LmxM.36.5780 | Gcd10p family, putative                                                                              |
| LmxM.36.5800 | hypothetical protein, conserved                                                                      |
| LmxM.36.5880 | small GTPase, putative                                                                               |
| LmxM.36.5890 | hypothetical protein, conserved                                                                      |
| LmxM.36.5930 | hypothetical protein, conserved                                                                      |
| LmxM.36.5940 | A distinct subfamily of CDD/CDA-like deaminases, putative                                            |
| LmxM.36.5980 | hypothetical protein, unknown function                                                               |
| LmxM.36.5990 | hook complex protein, conserved                                                                      |
| LmxM.36.6050 | hypothetical protein, conserved                                                                      |
| LmxM.36.6220 | flagellum transition zone component, putative                                                        |
| LmxM.36.6320 | Phosphatidylinositol 3-kinase tor1                                                                   |
| LmxM.36.6330 | hypothetical protein, conserved                                                                      |
| LmxM.36.6347 | hypothetical protein, conserved                                                                      |
| LmxM.36.6400 | 40S ribosomal protein S8, putative                                                                   |
| LmxM.36.6430 | protein transport protein Sec23-like protein                                                         |
| LmxM.36.6520 | hypothetical protein, conserved                                                                      |

|              |                                                                             |
|--------------|-----------------------------------------------------------------------------|
| LmxM.36.6590 | Sperm tail/Sperm tail C-terminal domain containing protein, putative        |
| LmxM.36.6670 | cytochrome b5-like Heme/Steroid binding domain containing protein, putative |
| LmxM.36.6890 | Nucleoporin NUP144                                                          |
| LmxM.36.6920 | Ribosomal protein L1p/L10e family, putative                                 |
| LmxM.36.6960 | hypothetical protein, conserved                                             |

Table S5. Protein kinase genes identified in the CL transcript samples of *L. mexicana* amastigotes

| gene ID         | protein name                                                      | kinase group |
|-----------------|-------------------------------------------------------------------|--------------|
| LmxM.03.0780    | serine/threonine-protein kinase, putative                         | AGC          |
| LmxM.18.1080    | protein kinase A catalytic subunit 3                              | AGC          |
| LmxM.25.2340    | AGC essential kinase 1                                            | AGC          |
| LmxM.28.1670    | differentiation inhibitory kinase, putative                       | AGC          |
| LmxM.29.0800    | rac serine-threonine kinase, putative                             | AGC          |
| LmxM.30.1530    | protein kinase, putative                                          | AGC          |
| LmxM.34.3960    | protein kinase A catalytic subunit isoform 2                      | AGC          |
| LmxM.34.4010    | protein kinase A catalytic subunit isoform 1                      | AGC          |
| LmxM.05.0130    | protein kinase, putative                                          | CAMK         |
| LmxM.07.0900    | serine/threonine kinase, putative                                 | CAMK         |
| LmxM.08_29.2020 | 5'-AMP-activated protein kinase catalytic subunit alpha, putative | CAMK         |
| LmxM.17.0060    | mitogen-activated protein kinase kinase 3, putative               | CAMK         |
| LmxM.19.0140    | Associated kinase of Tb14-3-3, putative                           | CAMK         |
| LmxM.19.1470    | protein kinase, putative                                          | CAMK         |
| LmxM.22.0810    | serine/threonine protein kinase sos2, putative                    | CAMK         |
| LmxM.22.1170    | Protein kinase domain containing protein, putative                | CAMK         |
| LmxM.26.2510    | protein kinase, putative                                          | CAMK         |
| LmxM.28.2000    | phosphorylase kinase-like protein                                 | CAMK         |
| LmxM.32.1710    | protein kinase, putative                                          | CAMK         |
| LmxM.34.0490    | CAMK/CAMKL family protein kinase, putative                        | CAMK         |
| LmxM.34.1050    | protein kinase, putative                                          | CAMK         |
| LmxM.36.0900    | SNF1-related protein kinases, putative (fragment)                 | CAMK         |
| LmxM.04.1210    | casein kinase I, putative                                         | CK1          |
| LmxM.25.1580    | casein kinase I, putative                                         | CK1          |
| LmxM.27.1780    | casein kinase I-like protein                                      | CK1          |
| LmxM.33.3020    | protein kinase, putative                                          | CK1          |
| LmxM.34.1000    | casein kinase I, putative                                         | CK1          |
| LmxM.34.1010    | casein kinase, putative                                           | CK1          |
| LmxM.08_29.2150 | cdc2-related kinase 10, putative                                  | CMGC         |
| LmxM.09.0400    | kinetoplastid kinetochore protein 10, putative                    | CMGC         |
| LmxM.09.0410    | kinetoplastid kinetochore protein 19, putative                    | CMGC         |
| LmxM.10.0200    | Mitogen-activated protein kinase 10, putative                     | CMGC         |
| LmxM.10.0490    | mitogen-activated protein kinase                                  | CMGC         |
| LmxM.12.0130    | Cell division protein kinase, putative                            | CMGC         |
| LmxM.14.0830    | protein kinase, putative                                          | CMGC         |
| LmxM.14.1070    | protein kinase, putative                                          | CMGC         |
| LmxM.15.0180    | serine/threonine-protein kinase, putative                         | CMGC         |
| LmxM.16.0990    | protein kinase, putative                                          | CMGC         |
| LmxM.18.0270    | protein kinase, putative                                          | CMGC         |
| LmxM.19.0180    | mitogen-activated protein kinase 9, putative                      | CMGC         |
| LmxM.19.0360    | protein kinase, putative                                          | CMGC         |
| LmxM.20_36.6470 | mitogen-activated protein kinase                                  | CMGC         |
| LmxM.21.1080    | cell division protein kinase 2                                    | CMGC         |
| LmxM.21.1650    | protein kinase, putative                                          | CMGC         |
| LmxM.22.0490    | protein kinase, putative                                          | CMGC         |
| LmxM.24.0670    | protein kinase, putative                                          | CMGC         |
| LmxM.25.1560    | protein kinase, putative                                          | CMGC         |
| LmxM.26.0980    | protein kinase, putative                                          | CMGC         |
| LmxM.27.0100    | protein kinase, putative                                          | CMGC         |
| LmxM.27.1800    | protein kinase-like protein                                       | CMGC         |
| LmxM.28.0580    | Mitogen-activated protein kinase 8, putative                      | CMGC         |
| LmxM.29.3580    | serine/threonine-protein kinase, putative                         | CMGC         |
| LmxM.31.3250    | mitogen-activated protein kinase, putative                        | CMGC         |
| LmxM.32.1380    | mitogen activated protein kinase, putative                        | CMGC         |
| LmxM.32.1830    | dual-specificity protein kinase, putative                         | CMGC         |
| LmxM.32.2070    | mitogen-activated protein kinase, putative                        | CMGC         |

|                 |                                                           |        |
|-----------------|-----------------------------------------------------------|--------|
| LmxM.34.1860    | protein kinase-like protein                               | CMGC   |
| LmxM.34.5010    | mitogen-activated protein kinase                          | CMGC   |
| LmxM.36.0720    | mitogen-activated protein kinase 2                        | CMGC   |
| LmxM.36.4250    | serine/threonine kinase, putative                         | CMGC   |
| LmxM.07.0170    | protein kinase, putative                                  | NEK    |
| LmxM.08_29.2570 | serine/threonine-protein kinase, putative                 | NEK    |
| LmxM.08_29.2670 | serine/threonine-protein kinase Nek, putative             | NEK    |
| LmxM.14.1410    | protein kinase, putative                                  | NEK    |
| LmxM.21.0853    | Serine/threonine-protein kinase NEK19, putative           | NEK    |
| LmxM.21.1565    | serine/threonine-protein kinase, putative                 | NEK    |
| LmxM.22.0950    | protein kinase, putative                                  | NEK    |
| LmxM.29.2130    | protein kinase, putative                                  | NEK    |
| LmxM.30.2960    | Repressor of differentiation kinase 2, putative           | NEK    |
| LmxM.02.0570    | protein kinase, putative                                  | Others |
| LmxM.08.0530    | protein kinase , putative                                 | Others |
| LmxM.08.0660    | protein kinase, putative                                  | Others |
| LmxM.08_29.0370 | protein kinase-like protein                               | Others |
| LmxM.08_29.2490 | protein kinase, putative                                  | Others |
| LmxM.08_29.2720 | serine/threonine protein kinase, putative                 | Others |
| LmxM.11.0060    | protein kinase, putative                                  | Others |
| LmxM.11.0250    | serine/threonine protein kinase, putative                 | Others |
| LmxM.11.0510    | protein kinase, putative                                  | Others |
| LmxM.15.0770    | protein kinase, putative                                  | Others |
| LmxM.16.0870    | protein kinase, putative                                  | Others |
| LmxM.19.0590    | protein kinase, putative                                  | Others |
| LmxM.20.0960    | protein kinase, putative                                  | Others |
| LmxM.20.1330    | kinase-like protein                                       | Others |
| LmxM.24.1730    | protein kinase, putative                                  | Others |
| LmxM.25.1520    | protein kinase, putative                                  | Others |
| LmxM.26.2060    | Protein kinase domain containing protein, putative        | Others |
| LmxM.26.2110    | protein kinase, putative                                  | Others |
| LmxM.26.2440    | protein kinase, putative                                  | Others |
| LmxM.28.1760    | protein kinase, putative                                  | Others |
| LmxM.29.1560    | protein kinase, putative                                  | Others |
| LmxM.30.2860    | protein kinase, putative                                  | Others |
| LmxM.31.1290    | Protein kinase domain containing protein, putative        | Others |
| LmxM.33.0940    | Wee1-like protein kinase, putative                        | Others |
| LmxM.33.2150    | eukaryotic translation initiation factor 2-alpha kinase 2 | Others |
| LmxM.33.2190    | kinatase, putative                                        | Others |
| LmxM.34.1730    | casein kinase II, putative                                | Others |
| LmxM.34.2320    | protein kinase, putative                                  | Others |
| LmxM.34.2870    | protein kinase, putative                                  | Others |
| LmxM.36.2630    | protein kinase, putative                                  | Others |
| LmxM.36.5350    | kinetoplastid kinetochore protein 2, putative             | Others |
| LmxM.04.0440    | serine/threonine protein kinase-like protein              | STE    |
| LmxM.05.0390    | protein kinase, putative                                  | STE    |
| LmxM.07.0250    | protein kinase, putative                                  | STE    |
| LmxM.07.0880    | protein kinase, putative                                  | STE    |
| LmxM.08.1228    | STE group serine/threonine-protein kinase, putative       | STE    |
| LmxM.14.1300    | protein kinase, putative                                  | STE    |
| LmxM.15.1200    | protein kinase, putative                                  | STE    |
| LmxM.17.0390    | protein kinase, putative                                  | STE    |
| LmxM.20.0770    | protein kinase, putative                                  | STE    |
| LmxM.21.0130    | serine/threonine protein kinase, putative                 | STE    |
| LmxM.24.1450    | protein kinase, putative                                  | STE    |
| LmxM.24.2320    | mitogen-activated protein kinase                          | STE    |
| LmxM.26.1730    | protein kinase, putative                                  | STE    |
| LmxM.27.1370    | protein kinase, putative                                  | STE    |
| LmxM.29.0600    | protein kinase, putative                                  | STE    |
| LmxM.29.3050    | protein kinase-like protein                               | STE    |
| LmxM.30.1830    | protein kinase-like protein                               | STE    |

|                 |                                                                    |              |
|-----------------|--------------------------------------------------------------------|--------------|
| LmxM.30.1840    | hypothetical protein, unknown function                             | STE          |
| LmxM.31.0120    | MEKK-related kinase 1, putative                                    | STE          |
| LmxM.31.0780    | protein kinase, putative                                           | STE          |
| LmxM.31.0810    | Repressor of differentiation kinase 1, putative                    | STE          |
| LmxM.32.1400    | protein kinase, putative                                           | STE          |
| LmxM.32.2290    | protein kinase, putative                                           | STE          |
| LmxM.33.2090    | protein kinase, putative                                           | STE          |
| LmxM.34.3170    | protein kinase, putative                                           | STE          |
| LmxM.34.4000    | protein kinase, putative                                           | STE          |
| LmxM.36.0860    | mitogen-activated protein kinase kinase 5                          | STE          |
| LmxM.36.0910    | mitogen-activated protein kinase-like protein                      | STE          |
| LmxM.36.3680    | mitogen activated kinase-like protein                              | STE          |
| LmxM.08_29.0240 | serine/threonine protein kinase RIO1, putative                     | Unclassified |
| LmxM.17.0670    | protein kinase, putative                                           | Unclassified |
| LmxM.19.0150    | mitogen-activated protein kinase kinase kinase, putative           | Unclassified |
| LmxM.31.0260    | Serine/threonine-protein kinase Nek1-related, putative             | Unclassified |
| LmxM.31.1810    | protein kinase, putative                                           | Unclassified |
| LmxM.32.1980    | serine/threonine-protein kinase a, putative                        | Unclassified |
| LmxM.34.5190    | NIMA-related kinase, putative                                      | Unclassified |
| LmxM.36.1530    | protein kinase, putative,serine/threonine protein kinase, putative | Unclassified |
| LmxM.36.2290    | serine/threonine protein kinase, putative                          | Unclassified |



Table S6. Protein kinase genes identified in the CL transcript samples of *L. mexicana* promastigotes

| gene ID         | protein name                                                      | kinase group |
|-----------------|-------------------------------------------------------------------|--------------|
| LmxM.03.0780    | serine/threonine-protein kinase, putative                         | AGC          |
| LmxM.25.2340    | AGC essential kinase 1                                            | AGC          |
| LmxM.29.0800    | rac serine-threonine kinase, putative                             | AGC          |
| LmxM.30.1530    | protein kinase, putative                                          | AGC          |
| LmxM.34.3960    | protein kinase A catalytic subunit isoform 2                      | AGC          |
| LmxM.34.4010    | protein kinase A catalytic subunit isoform 1                      | AGC          |
| LmxM.05.0130    | protein kinase, putative                                          | CAMK         |
| LmxM.07.0900    | serine/threonine kinase, putative                                 | CAMK         |
| LmxM.08_29.2020 | 5'-AMP-activated protein kinase catalytic subunit alpha, putative | CAMK         |
| LmxM.17.0060    | mitogen-activated protein kinase kinase 3, putative               | CAMK         |
| LmxM.19.0140    | Associated kinase of Tb14-3-3, putative                           | CAMK         |
| LmxM.19.1470    | protein kinase, putative                                          | CAMK         |
| LmxM.22.0810    | serine/threonine protein kinase sos2, putative                    | CAMK         |
| LmxM.28.2000    | phosphorylase kinase-like protein                                 | CAMK         |
| LmxM.32.1710    | protein kinase, putative                                          | CAMK         |
| LmxM.34.0490    | CAMK/CAMKL family protein kinase, putative                        | CAMK         |
| LmxM.34.1050    | protein kinase, putative                                          | CAMK         |
| LmxM.36.0900    | SNF1-related protein kinases, putative (fragment)                 | CAMK         |
| LmxM.04.1210    | casein kinase I, putative                                         | CK1          |
| LmxM.25.1580    | casein kinase I, putative                                         | CK1          |
| LmxM.27.1780    | casein kinase I-like protein                                      | CK1          |
| LmxM.33.3020    | protein kinase, putative                                          | CK1          |
| LmxM.34.1010    | casein kinase, putative                                           | CK1          |
| LmxM.09.0410    | kinetoplastid kinetochore protein 19, putative                    | CMGC         |
| LmxM.10.0490    | mitogen-activated protein kinase                                  | CMGC         |
| LmxM.14.1070    | protein kinase, putative                                          | CMGC         |
| LmxM.15.0180    | serine/threonine-protein kinase, putative                         | CMGC         |
| LmxM.16.0990    | protein kinase, putative                                          | CMGC         |
| LmxM.18.0270    | protein kinase, putative                                          | CMGC         |
| LmxM.19.0180    | mitogen-activated protein kinase 9, putative                      | CMGC         |
| LmxM.21.1080    | cell division protein kinase 2                                    | CMGC         |
| LmxM.21.1650    | protein kinase, putative                                          | CMGC         |
| LmxM.22.0490    | protein kinase, putative                                          | CMGC         |
| LmxM.24.0670    | protein kinase, putative                                          | CMGC         |
| LmxM.25.1560    | protein kinase, putative                                          | CMGC         |
| LmxM.26.0980    | protein kinase, putative                                          | CMGC         |
| LmxM.27.0100    | protein kinase, putative                                          | CMGC         |
| LmxM.28.0580    | Mitogen-activated protein kinase 8, putative                      | CMGC         |
| LmxM.29.2910    | mitogen-activated protein kinase, putative                        | CMGC         |
| LmxM.29.3580    | serine/threonine-protein kinase, putative                         | CMGC         |
| LmxM.31.3250    | mitogen-activated protein kinase, putative                        | CMGC         |
| LmxM.32.1380    | mitogen activated protein kinase, putative                        | CMGC         |
| LmxM.32.2070    | mitogen-activated protein kinase, putative                        | CMGC         |
| LmxM.34.5010    | mitogen-activated protein kinase                                  | CMGC         |
| LmxM.36.0720    | mitogen-activated protein kinase 2                                | CMGC         |
| LmxM.36.4250    | serine/threonine kinase, putative                                 | CMGC         |
| LmxM.07.0170    | protein kinase, putative                                          | NEK          |
| LmxM.08_29.2570 | serine/threonine-protein kinase, putative                         | NEK          |

|                 |                                                           |        |
|-----------------|-----------------------------------------------------------|--------|
| LmxM.14.1410    | protein kinase, putative                                  | NEK    |
| LmxM.21.1565    | serine/threonine-protein kinase, putative                 | NEK    |
| LmxM.22.0950    | protein kinase, putative                                  | NEK    |
| LmxM.29.2130    | protein kinase, putative                                  | NEK    |
| LmxM.30.2960    | Repressor of differentiation kinase 2, putative           | NEK    |
| LmxM.02.0570    | protein kinase, putative                                  | Others |
| LmxM.08.0530    | protein kinase , putative                                 | Others |
| LmxM.08_29.2490 | protein kinase, putative                                  | Others |
| LmxM.08_29.2720 | serine/threonine protein kinase, putative                 | Others |
| LmxM.11.0060    | protein kinase, putative                                  | Others |
| LmxM.11.0250    | serine/threonine protein kinase, putative                 | Others |
| LmxM.13.0440    | mitogen-activated protein kinase kinase 2                 | Others |
| LmxM.15.0770    | protein kinase, putative                                  | Others |
| LmxM.17.0790    | protein kinase, putative                                  | Others |
| LmxM.20.0960    | protein kinase, putative                                  | Others |
| LmxM.24.1730    | protein kinase, putative                                  | Others |
| LmxM.25.1520    | protein kinase, putative                                  | Others |
| LmxM.26.2060    | Protein kinase domain containing protein, putative        | Others |
| LmxM.26.2110    | protein kinase, putative                                  | Others |
| LmxM.29.1560    | protein kinase, putative                                  | Others |
| LmxM.30.2860    | protein kinase, putative                                  | Others |
| LmxM.31.1290    | Protein kinase domain containing protein, putative        | Others |
| LmxM.33.0940    | Wee1-like protein kinase, putative                        | Others |
| LmxM.33.2150    | eukaryotic translation initiation factor 2-alpha kinase 2 | Others |
| LmxM.33.2190    | kinatase, putative                                        | Others |
| LmxM.34.1730    | casein kinase II, putative                                | Others |
| LmxM.34.2320    | protein kinase, putative                                  | Others |
| LmxM.36.2630    | protein kinase, putative                                  | Others |
| LmxM.36.5350    | kinetoplastid kinetochore protein 2, putative             | Others |
| LmxM.04.0440    | serine/threonine protein kinase-like protein              | STE    |
| LmxM.05.0390    | protein kinase, putative                                  | STE    |
| LmxM.07.0250    | protein kinase, putative                                  | STE    |
| LmxM.07.0880    | protein kinase, putative                                  | STE    |
| LmxM.14.1300    | protein kinase, putative                                  | STE    |
| LmxM.15.1200    | protein kinase, putative                                  | STE    |
| LmxM.17.0390    | protein kinase, putative                                  | STE    |
| LmxM.20.0770    | protein kinase, putative                                  | STE    |
| LmxM.21.0130    | serine/threonine protein kinase, putative                 | STE    |
| LmxM.24.2320    | mitogen-activated protein kinase                          | STE    |
| LmxM.27.1370    | protein kinase, putative                                  | STE    |
| LmxM.29.3050    | protein kinase-like protein                               | STE    |
| LmxM.30.1830    | protein kinase-like protein                               | STE    |
| LmxM.30.1840    | hypothetical protein, unknown function                    | STE    |
| LmxM.31.0120    | MEKK-related kinase 1, putative                           | STE    |
| LmxM.31.0780    | protein kinase, putative                                  | STE    |
| LmxM.31.0810    | Repressor of differentiation kinase 1, putative           | STE    |
| LmxM.32.1400    | protein kinase, putative                                  | STE    |
| LmxM.32.2290    | protein kinase, putative                                  | STE    |
| LmxM.33.2090    | protein kinase, putative                                  | STE    |
| LmxM.34.3170    | protein kinase, putative                                  | STE    |
| LmxM.34.4000    | protein kinase, putative                                  | STE    |
| LmxM.36.0910    | mitogen-activated protein kinase-like protein             | STE    |

|              |                                                                    |              |
|--------------|--------------------------------------------------------------------|--------------|
| LmxM.36.3680 | mitogen activated kinase-like protein                              | STE          |
| LmxM.10.0830 | serine/threonine-protein kinase, putative                          | Unclassified |
| LmxM.17.0670 | protein kinase, putative                                           | Unclassified |
| LmxM.19.0150 | mitogen-activated protein kinase kinase kinase, putative           | Unclassified |
| LmxM.31.0260 | Serine/threonine-protein kinase Nek1-related, putative             | Unclassified |
| LmxM.31.1810 | protein kinase, putative                                           | Unclassified |
| LmxM.34.5190 | NIMA-related kinase, putative                                      | Unclassified |
| LmxM.36.1530 | protein kinase, putative,serine/threonine protein kinase, putative | Unclassified |
| LmxM.36.2290 | serine/threonine protein kinase, putative                          | Unclassified |

Table S7. High-confidence tanesprimycin affected RBPs of *L.mexicana* promastigote.

| [-Log(P-value)] | Log2 FC | Protein IDs | Fasta headers                                                                  | Unique peptides |
|-----------------|---------|-------------|--------------------------------------------------------------------------------|-----------------|
| 6.269377902     | 4.16349 | E9ATF4      | tr E9ATF4 E9ATF4_LEIMU Uncharacterized protein OS=Leishmania mexicana (s       | 2               |
| 5.086476262     | 3.11531 | E9AK31      | tr E9AK31 E9AK31_LEIMU Uncharacterized protein OS=Leishmania mexicana (s       | 3               |
| 5.347419469     | 2.92413 | E9B6K7      | tr E9B6K7 E9B6K7_LEIMU Putative 60S ribosomal subunit protein L31 OS=Leish     | 5               |
| 5.486657911     | 2.72793 | E9B012      | tr E9B012 E9B012_LEIMU Putative zinc transporter OS=Leishmania mexicana (s     | 3               |
| 5.307605285     | 2.58173 | E9B5P8      | tr E9B5P8 E9B5P8_LEIMU Uncharacterized protein OS=Leishmania mexicana (s       | 3               |
| 4.913396542     | 2.41913 | E9AMA8      | tr E9AMA8 E9AMA8_LEIMU Superoxide dismutase OS=Leishmania mexicana (s          | 2               |
| 3.443121275     | 2.28862 | E9AZ65      | tr E9AZ65 E9AZ65_LEIMU Eukaryotic translation initiation factor eIF-4E,putativ | 2               |
| 4.824254384     | 2.22282 | E9B106      | tr E9B106 E9B106_LEIMU Uncharacterized protein OS=Leishmania mexicana (s       | 2               |
| 4.804908894     | 2.21383 | E9B4C7      | tr E9B4C7 E9B4C7_LEIMU Uncharacterized protein OS=Leishmania mexicana (s       | 6               |
| 4.806453312     | 2.20749 | E9B645;E9A  | tr E9B645 E9B645_LEIMU Putative 60S ribosomal protein L26 OS=Leishmania r      | 2               |
| 4.812039485     | 2.17532 | E9B0Z8      | tr E9B0Z8 E9B0Z8_LEIMU Conserved zinc-finger protein OS=Leishmania mexic       | 3               |
| 4.468215109     | 2.04841 | E9ATL7      | tr E9ATL7 E9ATL7_LEIMU Uncharacterized protein OS=Leishmania mexicana (s       | 2               |
| 4.581239834     | 1.95494 | E9AS66      | tr E9AS66 E9AS66_LEIMU Uncharacterized protein OS=Leishmania mexicana (s       | 3               |
| 4.905267512     | 1.95232 | E9AM47      | tr E9AM47 E9AM47_LEIMU Uncharacterized protein OS=Leishmania mexicana          | 5               |
| 5.012648766     | 1.94218 | E9AVK9      | tr E9AVK9 E9AVK9_LEIMU Uncharacterized protein OS=Leishmania mexicana (        | 5               |
| 4.361048879     | 1.93489 | E9AKC8;E9A  | tr E9AKC8 E9AKC8_LEIMU Putative viscerotropic leishmaniasis antigen OS=Leis    | 2               |
| 5.158093474     | 1.89672 | E9AV01      | tr E9AV01 E9AV01_LEIMU Mitochondrial processing peptidase alpha subunit,p      | 3               |
| 4.276434901     | 1.87502 | E9ALD3      | tr E9ALD3 E9ALD3_LEIMU Peptide methionine sulfoxide reductase-like (Putativ    | 2               |
| 4.938531141     | 1.85994 | E9AQ10      | tr E9AQ10 E9AQ10_LEIMU Putative ATP-dependent RNA helicase OS=Leishmai         | 2               |
| 4.517971563     | 1.81621 | E9B474;E9B  | tr E9B474 E9B474_LEIMU Uncharacterized protein OS=Leishmania mexicana (s       | 3               |
| 4.37173809      | 1.79994 | E9AQ75      | tr E9AQ75 E9AQ75_LEIMU Uncharacterized protein OS=Leishmania mexicana l        | 4               |
| 4.091768367     | 1.78349 | E9AYC5      | tr E9AYC5 E9AYC5_LEIMU Uncharacterized protein OS=Leishmania mexicana (s       | 2               |
| 4.145741093     | 1.78148 | E9B442      | tr E9B442 E9B442_LEIMU Uncharacterized protein OS=Leishmania mexicana (s       | 2               |
| 4.112647259     | 1.76748 | E9AZK8      | tr E9AZK8 E9AZK8_LEIMU Carbonic anhydrase-like protein OS=Leishmania me>       | 6               |
| 4.247851286     | 1.74648 | E9AN61      | tr E9AN61 E9AN61_LEIMU Glycerol-3-phosphate dehydrogenase [NAD(+)] OS=         | 3               |
| 4.367679012     | 1.72921 | E9B1P8      | tr E9B1P8 E9B1P8_LEIMU Uncharacterized protein OS=Leishmania mexicana (s       | 5               |
| 4.204381205     | 1.71561 | E9AK86      | tr E9AK86 E9AK86_LEIMU Acyltransferase-like protein, copy 2 OS=Leishmania      | 3               |
| 4.200840649     | 1.67738 | E9AMQ3      | tr E9AMQ3 E9AMQ3_LEIMU Uncharacterized protein OS=Leishmania mexican           | 5               |
| 4.133498272     | 1.66044 | E9AS63      | tr E9AS63 E9AS63_LEIMU Proteasome regulatory non-ATP-ase subunit,putativ       | 4               |
| 5.15633423      | 1.66    | E9AT16;E9A  | tr E9AT16 E9AT16_LEIMU Methyltransferase OS=Leishmania mexicana (strain        | 3               |
| 4.288908238     | 1.65236 | E9B2K9      | tr E9B2K9 E9B2K9_LEIMU Uncharacterized protein OS=Leishmania mexicana (s       | 2               |
| 4.60083345      | 1.63465 | E9AU20      | tr E9AU20 E9AU20_LEIMU Uncharacterized protein OS=Leishmania mexicana (        | 12              |
| 4.178451273     | 1.62976 | E9AZ12      | tr E9AZ12 E9AZ12_LEIMU Uncharacterized protein OS=Leishmania mexicana (s       | 4               |
| 5.098073823     | 1.60241 | E9AP69      | tr E9AP69 E9AP69_LEIMU Uncharacterized protein OS=Leishmania mexicana (s       | 5               |
| 4.219316521     | 1.56252 | E9AK64      | tr E9AK64 E9AK64_LEIMU Pescadillo homolog OS=Leishmania mexicana (strair       | 2               |
| 4.259475238     | 1.55658 | E9AJC9      | tr E9AJC9 E9AJC9_LEIMU 40S ribosomal protein S7 OS=Leishmania mexicana (s      | 10              |
| 3.953165767     | 1.54311 | E9AMC1      | tr E9AMC1 E9AMC1_LEIMU Uncharacterized protein OS=Leishmania mexicana          | 7               |
| 3.981897843     | 1.53032 | E9AT47      | tr E9AT47 E9AT47_LEIMU Uncharacterized protein OS=Leishmania mexicana (s       | 2               |
| 4.892544892     | 1.50434 | E9AZP7      | tr E9AZP7 E9AZP7_LEIMU Putative RNA binding protein rbp16 OS=Leishmania        | 5               |
| 4.011215195     | 1.46157 | E9AK29      | tr E9AK29 E9AK29_LEIMU 60S ribosomal protein L11 (L5, L16) OS=Leishmania l     | 6               |
| 4.223026912     | 1.46005 | E9B049      | tr E9B049 E9B049_LEIMU DNA topoisomerase 2 OS=Leishmania mexicana (str         | 8               |
| 4.499295107     | 1.42463 | E9AZA1      | tr E9AZA1 E9AZA1_LEIMU Small nuclear ribonucleoprotein protein,putative OS     | 2               |
| 4.930981417     | 1.41324 | Q25327;E9A  | tr Q25327 Q25327_LEIME Membrane-bound acid phosphatase OS=Leishmania           | 7               |
| 2.901080864     | 1.38597 | E9AQU5      | tr E9AQU5 E9AQU5_LEIMU Uncharacterized protein OS=Leishmania mexicana          | 2               |
| 3.935209397     | 1.36663 | E9AUX6      | tr E9AUX6 E9AUX6_LEIMU Uncharacterized protein OS=Leishmania mexicana (        | 2               |
| 3.847628902     | 1.35868 | E9B1D2      | tr E9B1D2 E9B1D2_LEIMU Putative serine/threonine-protein kinase OS=Leishn      | 11              |
| 3.967698186     | 1.30052 | E9AK54      | tr E9AK54 E9AK54_LEIMU Uncharacterized protein OS=Leishmania mexicana (s       | 2               |
| 4.13091393      | 1.28954 | Q868H1;E9A  | tr Q868H1 Q868H1_LEIME Inhibitor of cysteine peptidases OS=Leishmania me:      | 2               |
| 4.726094181     | 1.26993 | E9AZJ9      | tr E9AZJ9 E9AZJ9_LEIMU Uncharacterized protein OS=Leishmania mexicana (st      | 3               |
| 3.488549237     | 1.26748 | E9AP04;E9A  | tr E9AP04 E9AP04_LEIMU Promastigote surface antigen protein PSA (Fragmen       | 3               |
| 4.532926193     | 1.25925 | E9ALB7      | tr E9ALB7 E9ALB7_LEIMU RNA binding protein-like protein OS=Leishmania me:      | 7               |
| 3.987140275     | 1.21935 | E9AM79      | tr E9AM79 E9AM79_LEIMU Structural maintenance of chromosomes protein C         | 3               |
| 4.150885739     | 1.20836 | E9B549      | tr E9B549 E9B549_LEIMU Uncharacterized protein OS=Leishmania mexicana (s       | 5               |
| 4.030204919     | 1.15628 | E9ALA4      | tr E9ALA4 E9ALA4_LEIMU Splicing factor ptrs1-like protein OS=Leishmania me>    | 15              |
| 2.793604677     | 1.15196 | E9AUY6      | tr E9AUY6 E9AUY6_LEIMU Uncharacterized protein OS=Leishmania mexicana (        | 3               |
| 3.059888365     | 1.10737 | E9B3C4      | tr E9B3C4 E9B3C4_LEIMU Uncharacterized protein OS=Leishmania mexicana (s       | 2               |
| 4.040616675     | 1.10131 | E9AXM2      | tr E9AXM2 E9AXM2_LEIMU Uncharacterized protein OS=Leishmania mexicana          | 8               |
| 3.511246316     | 1.09908 | E9AUU6      | tr E9AUU6 E9AUU6_LEIMU Putative 40S ribosomal protein S11 OS=Leishmania        | 5               |
| 3.565578811     | 1.07431 | E9B3Z3      | tr E9B3Z3 E9B3Z3_LEIMU Ribulose-phosphate 3-epimerase OS=Leishmania me         | 2               |

|                    |                |                    |                                                                                   |          |
|--------------------|----------------|--------------------|-----------------------------------------------------------------------------------|----------|
| 4.292668861        | 1.07394        | E9AKA9             | tr E9AKA9 E9AKA9_LEIMU Uncharacterized protein OS=Leishmania mexicana (           | 2        |
| 3.719297717        | 1.06799        | E9AZN4             | tr E9AZN4 E9AZN4_LEIMU Uncharacterized protein OS=Leishmania mexicana (           | 3        |
| 3.379330456        | 1.05918        | E9AL41             | tr E9AL41 E9AL41_LEIMU Uncharacterized protein OS=Leishmania mexicana (s          | 2        |
| 2.640719312        | 1.03507        | E9AVM5             | tr E9AVM5 E9AVM5_LEIMU Uncharacterized protein OS=Leishmania mexicana             | 2        |
| 3.510208645        | 1.01183        | E9AZB6             | tr E9AZB6 E9AZB6_LEIMU Putative RNA-binding protein OS=Leishmania mexic           | 3        |
| 3.249433526        | 1.01157        | E9AV59             | tr E9AV59 E9AV59_LEIMU Xanthine phosphoribosyltransferase OS=Leishmania           | 4        |
| 3.940347401        | 0.99981        | E9APZ2             | tr E9APZ2 E9APZ2_LEIMU Uncharacterized protein OS=Leishmania mexicana (s          | 24       |
| <b>3.686366429</b> | <b>0.9767</b>  | <b>E9ATF6;E9A</b>  | <b>tr E9ATF6 E9ATF6_LEIMU Putative 60S ribosomal protein L34 OS=Leishmania r</b>  | <b>3</b> |
| 2.893901962        | 0.96295        | E9B4I3             | tr E9B4I3 E9B4I3_LEIMU Malate dehydrogenase OS=Leishmania mexicana (str           | 2        |
| 3.518426224        | 0.95839        | E9AJR6             | tr E9AJR6 E9AJR6_LEIMU Uncharacterized protein OS=Leishmania mexicana (s          | 2        |
| <b>3.224914686</b> | <b>0.95651</b> | <b>E9AQK4</b>      | <b>tr E9AQK4 E9AQK4_LEIMU Putative 60S ribosomal protein L21 OS=Leishmania</b>    | <b>3</b> |
| 3.356097985        | 0.95299        | E9AXC4             | tr E9AXC4 E9AXC4_LEIMU Uncharacterized protein OS=Leishmania mexicana (:          | 3        |
| <b>3.688099222</b> | <b>0.95056</b> | <b>E9ASIO;E9AI</b> | <b>tr E9ASIO E9ASIO_LEIMU Putative ubiquitin/ribosomal protein S27a OS=Leishm</b> | <b>2</b> |
| 3.794331377        | 0.91709        | E9AQ77             | tr E9AQ77 E9AQ77_LEIMU Uncharacterized protein OS=Leishmania mexicana             | 9        |
| 2.78818461         | 0.91164        | E9AMG5             | tr E9AMG5 E9AMG5_LEIMU Uncharacterized protein OS=Leishmania mexicana             | 2        |
| 4.072148806        | 0.89884        | E9AXV0             | tr E9AXV0 E9AXV0_LEIMU Uncharacterized protein OS=Leishmania mexicana (           | 2        |
| 3.362790816        | 0.89725        | E9B2E2             | tr E9B2E2 E9B2E2_LEIMU Uncharacterized protein OS=Leishmania mexicana (s          | 16       |
| 3.802032866        | 0.8943         | E9AV16             | tr E9AV16 E9AV16_LEIMU Putative DnaJ protein OS=Leishmania mexicana (str          | 3        |
| 3.656337928        | 0.89083        | E9AQX9             | tr E9AQX9 E9AQX9_LEIMU Uncharacterized protein OS=Leishmania mexicana             | 8        |
| 4.166036983        | 0.87441        | E9APR7             | tr E9APR7 E9APR7_LEIMU Elongation of fatty acids protein OS=Leishmania me         | 2        |
| 3.157725141        | 0.8431         | E9B1F3             | tr E9B1F3 E9B1F3_LEIMU Peptidyl-prolyl cis-trans isomerase OS=Leishmania m        | 3        |
| 2.613059015        | 0.84236        | E9AZ16             | tr E9AZ16 E9AZ16_LEIMU Putative intraflagellar transport protein IFT88 OS=Le      | 2        |
| 3.45791519         | 0.83926        | E9AL69             | tr E9AL69 E9AL69_LEIMU Uncharacterized protein OS=Leishmania mexicana (s          | 5        |
| <b>3.724814654</b> | <b>0.81805</b> | <b>E9ALP4</b>      | <b>tr E9ALP4 E9ALP4_LEIMU Putative 40S ribosomal protein S15A OS=Leishmania</b>   | <b>5</b> |
| 3.10922099         | 0.81061        | E9ARSO             | tr E9ARSO E9ARSO_LEIMU Uncharacterized protein OS=Leishmania mexicana (s          | 2        |
| 3.170483291        | 0.80365        | E9AWQ4             | tr E9AWQ4 E9AWQ4_LEIMU Kinesin-like protein OS=Leishmania mexicana (str           | 5        |
| 3.456671752        | 0.80038        | E9B700             | tr E9B700 E9B700_LEIMU Uncharacterized protein OS=Leishmania mexicana (s          | 12       |
| 2.799089751        | 0.79977        | E9AST5             | tr E9AST5 E9AST5_LEIMU Putative poly-zinc finger protein 2 OS=Leishmania m        | 3        |
| 3.462344693        | 0.79974        | E9ARK0             | tr E9ARK0 E9ARK0_LEIMU Putative 60S ribosomal protein L10a OS=Leishmania          | 5        |
| 2.878113295        | 0.79525        | E9AUV1             | tr E9AUV1 E9AUV1_LEIMU Uncharacterized protein OS=Leishmania mexicana             | 2        |
| 4.057967725        | 0.78045        | E9B2N4             | tr E9B2N4 E9B2N4_LEIMU Uncharacterized protein OS=Leishmania mexicana (           | 3        |
| <b>3.069723532</b> | <b>0.77644</b> | <b>E9B5U1;E9E</b>  | <b>tr E9B5U1 E9B5U1_LEIMU 60S ribosomal protein L18a OS=Leishmania mexicar</b>    | <b>8</b> |
| 3.328950608        | 0.77068        | E9AT85             | tr E9AT85 E9AT85_LEIMU Fibrillarin OS=Leishmania mexicana (strain MHOM/C          | 3        |
| 2.540665338        | 0.76531        | E9AS22             | tr E9AS22 E9AS22_LEIMU Putative kinesin OS=Leishmania mexicana (strain MF         | 5        |
| 2.645619061        | 0.75935        | E9B5D6             | tr E9B5D6 E9B5D6_LEIMU Uncharacterized protein OS=Leishmania mexicana (           | 2        |
| 2.609530632        | 0.75693        | E9B108             | tr E9B108 E9B108_LEIMU Sphingosine phosphate lyase-like protein,putative O        | 2        |
| 3.258382882        | 0.75548        | E9AVK4             | tr E9AVK4 E9AVK4_LEIMU Uncharacterized protein OS=Leishmania mexicana (           | 17       |
| 3.413022291        | 0.75522        | Q2HWD2;E5          | tr Q2HWD2 Q2HWD2_LEIAM Putative lanosterol C-14 demethylase OS=Leishr             | 5        |
| 3.046044032        | 0.75172        | E9B0H7             | tr E9B0H7 E9B0H7_LEIMU Uncharacterized protein OS=Leishmania mexicana (           | 2        |
| 3.28266902         | 0.74281        | E9ATU4             | tr E9ATU4 E9ATU4_LEIMU Uncharacterized protein OS=Leishmania mexicana (           | 29       |
| 3.162984694        | 0.74127        | E9AQ29             | tr E9AQ29 E9AQ29_LEIMU Ribonucleoprotein p18, mitochondrial,putative OS=          | 9        |
| 3.046939971        | 0.73378        | E9B0Q0             | tr E9B0Q0 E9B0Q0_LEIMU Small nuclear ribonucleoprotein E OS=Leishmania n          | 2        |
| 3.268650023        | 0.72749        | E9ALF6             | tr E9ALF6 E9ALF6_LEIMU Uncharacterized protein OS=Leishmania mexicana (s          | 5        |
| 3.412160142        | 0.72057        | E9B0E2             | tr E9B0E2 E9B0E2_LEIMU Putative 2-hydroxy-3-oxopropionate reductase OS=L          | 2        |
| 3.353617383        | 0.70951        | E9AUF1;E9A         | tr E9AUF1 E9AUF1_LEIMU Phosphoglycerate kinase OS=Leishmania mexicana             | 7        |
| 2.520221388        | 0.69684        | E9AT28             | tr E9AT28 E9AT28_LEIMU Nuclear pore protein OS=Leishmania mexicana (stra          | 5        |
| 3.513413302        | 0.68217        | E9AVG7;Q8          | tr E9AVG7 E9AVG7_LEIMU Putative cytochrome c oxidase subunit VI OS=Leish          | 3        |
| <b>2.713981613</b> | <b>0.65756</b> | <b>E9AZR2</b>      | <b>tr E9AZR2 E9AZR2_LEIMU 40S ribosomal protein S14 OS=Leishmania mexicana</b>    | <b>5</b> |
| 2.823822769        | 0.65004        | E9B6W8             | tr E9B6W8 E9B6W8_LEIMU Uncharacterized protein OS=Leishmania mexicana             | 3        |
| 1.94106109         | 0.63407        | E9B1B7             | tr E9B1B7 E9B1B7_LEIMU Uncharacterized protein OS=Leishmania mexicana (s          | 2        |
| 3.776297554        | 0.62999        | E9B6L6             | tr E9B6L6 E9B6L6_LEIMU Uncharacterized protein OS=Leishmania mexicana (s          | 4        |
| 3.007735651        | 0.62289        | E9AVQ7             | tr E9AVQ7 E9AVQ7_LEIMU Uncharacterized protein OS=Leishmania mexicana             | 12       |
| 2.952642165        | 0.60534        | E9AU73             | tr E9AU73 E9AU73_LEIMU Uncharacterized protein OS=Leishmania mexicana (           | 3        |
| 2.940718562        | 0.60437        | E9AQJ6;O7          | tr E9AQJ6 E9AQJ6_LEIMU Uncharacterized protein OS=Leishmania mexicana (s          | 4        |
| 2.382173999        | 0.60209        | E9AR29             | tr E9AR29 E9AR29_LEIMU Putative P-type ATPase OS=Leishmania mexicana (st          | 3        |
| <b>2.800593604</b> | <b>0.59344</b> | <b>E9AX53</b>      | <b>tr E9AX53 E9AX53_LEIMU 40S ribosomal protein S8 OS=Leishmania mexicana (</b>   | <b>6</b> |
| 2.405492005        | 0.59197        | E9ALU6             | tr E9ALU6 E9ALU6_LEIMU Putative ATP-dependent Clp protease subunit, heat          | 4        |
| 2.856950684        | 0.58674        | E9ANT3             | tr E9ANT3 E9ANT3_LEIMU Uncharacterized protein OS=Leishmania mexicana (           | 3        |
| 2.312097592        | 0.58452        | E9AXK9             | tr E9AXK9 E9AXK9_LEIMU Uncharacterized protein OS=Leishmania mexicana (:          | 2        |
| 2.9152792          | 0.58149        | E9APB2             | tr E9APB2 E9APB2_LEIMU Uncharacterized protein OS=Leishmania mexicana (:          | 10       |
| 3.498301767        | 0.57394        | E9APL2             | tr E9APL2 E9APL2_LEIMU Uncharacterized protein OS=Leishmania mexicana (s          | 2        |
| 2.065682747        | 0.56674        | E9APA9             | tr E9APA9 E9APA9_LEIMU Uncharacterized protein OS=Leishmania mexicana (           | 2        |
| 2.559106034        | 0.56104        | E9APW0             | tr E9APW0 E9APW0_LEIMU Uncharacterized protein OS=Leishmania mexicana             | 2        |

|             |          |            |                                                                               |    |
|-------------|----------|------------|-------------------------------------------------------------------------------|----|
| 2.930322153 | 0.55911  | E9AMW3     | tr E9AMW3 E9AMW3_LEIMU Mitochondrial RNA binding protein 2 OS=Leishm          | 4  |
| 2.602595653 | 0.55527  | E9ATS5     | tr E9ATS5 E9ATS5_LEIMU Uncharacterized protein OS=Leishmania mexicana (s      | 5  |
| 2.868497063 | 0.55409  | E9AWS6;A0  | tr E9AWS6 E9AWS6_LEIMU Triosephosphate isomerase OS=Leishmania mexic          | 7  |
| 2.987436555 | 0.55143  | E9ALH0     | tr E9ALH0 E9ALH0_LEIMU Uncharacterized protein OS=Leishmania mexicana (       | 4  |
| 2.431254837 | 0.54769  | E9B6D4     | tr E9B6D4 E9B6D4_LEIMU Putative RNA binding protein OS=Leishmania mexic       | 3  |
| 2.259045065 | 0.53818  | E9B2R8     | tr E9B2R8 E9B2R8_LEIMU Uncharacterized protein OS=Leishmania mexicana (s      | 2  |
| 1.756381233 | 0.53761  | E9B2F4     | tr E9B2F4 E9B2F4_LEIMU Uncharacterized protein OS=Leishmania mexicana (s      | 2  |
| 2.832241589 | 0.53485  | E9B4F8     | tr E9B4F8 E9B4F8_LEIMU Small nuclear ribonucleoprotein Sm D2 OS=Leishmar      | 3  |
| 2.205888504 | 0.53365  | E9B3T0     | tr E9B3T0 E9B3T0_LEIMU Uncharacterized protein OS=Leishmania mexicana (s      | 3  |
| 3.263199683 | 0.53087  | E9B722     | tr E9B722 E9B722_LEIMU Uncharacterized protein OS=Leishmania mexicana (s      | 2  |
| 2.463317089 | 0.52989  | E9ARU5     | tr E9ARU5 E9ARU5_LEIMU Uncharacterized protein OS=Leishmania mexicana         | 9  |
| 2.512927682 | 0.50352  | E9AJH4     | tr E9AJH4 E9AJH4_LEIMU Uncharacterized protein OS=Leishmania mexicana (s      | 2  |
| 1.60749384  | 0.49705  | E9AQ28     | tr E9AQ28 E9AQ28_LEIMU Putative replication Factor A 28 kDa subunit OS=Lei    | 2  |
| 1.743773355 | 0.47907  | E9B625     | tr E9B625 E9B625_LEIMU Uncharacterized protein OS=Leishmania mexicana (s      | 2  |
| 2.361613014 | 0.47611  | E9AXC6;E9A | tr E9AXC6 E9AXC6_LEIMU RNA-binding protein, putative, UPB1 OS=Leishmani       | 5  |
| 2.400272983 | 0.47593  | E9AZ66     | tr E9AZ66 E9AZ66_LEIMU Uncharacterized protein OS=Leishmania mexicana (s      | 3  |
| 3.193530547 | 0.47281  | E9B1Q2     | tr E9B1Q2 E9B1Q2_LEIMU Uncharacterized protein OS=Leishmania mexicana (       | 4  |
| 2.270558691 | 0.4691   | E9B163     | tr E9B163 E9B163_LEIMU Putative aldehyde dehydrogenase OS=Leishmania m        | 3  |
| 2.341868859 | 0.46601  | E9APY5     | tr E9APY5 E9APY5_LEIMU Putative tyrosyl-tRNA synthetase OS=Leishmania me      | 5  |
| 2.478789732 | 0.46224  | E9AXG9     | tr E9AXG9 E9AXG9_LEIMU Peptidyl-prolyl cis-trans isomerase OS=Leishmania r    | 5  |
| 2.596574853 | 0.4592   | E9B0F9     | tr E9B0F9 E9B0F9_LEIMU Kinesin-like protein OS=Leishmania mexicana (strain    | 2  |
| 3.114347309 | 0.45712  | E9AL18     | tr E9AL18 E9AL18_LEIMU Putative aspartyl aminopeptidase OS=Leishmania me      | 2  |
| 2.242210726 | 0.43472  | E9AWR8     | tr E9AWR8 E9AWR8_LEIMU Putative malic enzyme OS=Leishmania mexicana (         | 6  |
| 1.716171006 | 0.43039  | E9AUF8     | tr E9AUF8 E9AUF8_LEIMU Uncharacterized protein OS=Leishmania mexicana (       | 2  |
| 2.710064928 | 0.42976  | E9AYZ5     | tr E9AYZ5 E9AYZ5_LEIMU Putative isovaleryl-coA dehydrogenase OS=Leishmar      | 4  |
| 2.380253227 | 0.41861  | E9B3L2;P27 | tr E9B3L2 E9B3L2_LEIMU Heat shock protein 83-1 OS=Leishmania mexicana (st     | 32 |
| 2.652407542 | 0.41754  | E9ANJ3     | tr E9ANJ3 E9ANJ3_LEIMU Putative pumilio-repeat, RNA-binding protein OS=Le     | 18 |
| 3.156718763 | 0.41663  | E9ATD6     | tr E9ATD6 E9ATD6_LEIMU Putative signal recognition particle receptor like prc | 3  |
| 3.109852808 | 0.41585  | E9B3P3     | tr E9B3P3 E9B3P3_LEIMU Uncharacterized protein OS=Leishmania mexicana (s      | 2  |
| 2.221903929 | 0.40961  | E9AMV3     | tr E9AMV3 E9AMV3_LEIMU Uncharacterized protein OS=Leishmania mexicana         | 10 |
| 2.506200526 | 0.40208  | E9AN04     | tr E9AN04 E9AN04_LEIMU Uncharacterized protein OS=Leishmania mexicana (       | 8  |
| 2.416682141 | 0.40176  | E9AJT5     | tr E9AJT5 E9AJT5_LEIMU Uncharacterized protein OS=Leishmania mexicana (st     | 7  |
| 2.944059342 | -0.39995 | E9AX62     | tr E9AX62 E9AX62_LEIMU Uncharacterized protein OS=Leishmania mexicana (s      | 2  |
| 2.715142401 | -0.41008 | E9B2F6     | tr E9B2F6 E9B2F6_LEIMU Uncharacterized protein OS=Leishmania mexicana (s      | 5  |
| 2.348135586 | -0.41372 | E9B2Z3     | tr E9B2Z3 E9B2Z3_LEIMU Uncharacterized protein OS=Leishmania mexicana (s      | 2  |
| 2.169656095 | -0.41677 | E9ATG6     | tr E9ATG6 E9ATG6_LEIMU Putative glycyl tRNA synthetase OS=Leishmania me:      | 6  |
| 2.938605169 | -0.41729 | E9B5Y6     | tr E9B5Y6 E9B5Y6_LEIMU Uncharacterized protein OS=Leishmania mexicana (s      | 2  |
| 2.798740005 | -0.41861 | E9AV21     | tr E9AV21 E9AV21_LEIMU Putative la RNA binding protein OS=Leishmania mex      | 4  |
| 2.522018052 | -0.41991 | E9ASU7     | tr E9ASU7 E9ASU7_LEIMU Uncharacterized protein OS=Leishmania mexicana (       | 4  |
| 2.110839835 | -0.4222  | Q2TUW2;E9  | tr Q2TUW2 Q2TUW2_LEIAM Inosine-5-monophosphate dehydrogenase OS=Le            | 5  |
| 2.587826834 | -0.42351 | E9AQK9     | tr E9AQK9 E9AQK9_LEIMU Uncharacterized protein OS=Leishmania mexicana         | 2  |
| 2.138802252 | -0.42359 | E9AWF1     | tr E9AWF1 E9AWF1_LEIMU Putative dynein heavy chain OS=Leishmania mexic        | 11 |
| 2.044855536 | -0.42535 | E9AXD1     | tr E9AXD1 E9AXD1_LEIMU Uncharacterized protein OS=Leishmania mexicana (       | 6  |
| 1.89832921  | -0.42636 | E9B131     | tr E9B131 E9B131_LEIMU Putative RNA-binding protein OS=Leishmania mexic       | 3  |
| 2.226065786 | -0.42714 | E9AK89     | tr E9AK89 E9AK89_LEIMU Uncharacterized protein OS=Leishmania mexicana (s      | 5  |
| 2.162732686 | -0.42755 | E9APD0     | tr E9APD0 E9APD0_LEIMU NADH-cytochrome b5 reductase OS=Leishmania me          | 4  |
| 2.3582175   | -0.4282  | E9B4N8     | tr E9B4N8 E9B4N8_LEIMU Uncharacterized protein OS=Leishmania mexicana (       | 8  |
| 2.000951245 | -0.42873 | E9AT99     | tr E9AT99 E9AT99_LEIMU 14-3-3 protein-like protein OS=Leishmania mexicana     | 10 |
| 2.341549185 | -0.4294  | E9AS67     | tr E9AS67 E9AS67_LEIMU Uncharacterized protein OS=Leishmania mexicana (s      | 11 |
| 2.370266513 | -0.42946 | E9B4N7     | tr E9B4N7 E9B4N7_LEIMU Uncharacterized protein OS=Leishmania mexicana (       | 4  |
| 2.415474044 | -0.42975 | E9AK75     | tr E9AK75 E9AK75_LEIMU Uncharacterized protein OS=Leishmania mexicana (s      | 4  |
| 1.809899169 | -0.4305  | E9AZ71     | tr E9AZ71 E9AZ71_LEIMU Uncharacterized protein OS=Leishmania mexicana (s      | 7  |
| 1.863805736 | -0.4311  | E9AX98     | tr E9AX98 E9AX98_LEIMU Uncharacterized protein OS=Leishmania mexicana (s      | 2  |
| 2.416320056 | -0.43142 | E8NHE3     | tr E8NHE3 E8NHE3_LEIMU Putative 60S ribosomal protein L28 OS=Leishmania       | 3  |
| 2.498456242 | -0.43344 | E9B2F9     | tr E9B2F9 E9B2F9_LEIMU Uncharacterized protein OS=Leishmania mexicana (s      | 2  |
| 2.674206101 | -0.43461 | E9AMX3     | tr E9AMX3 E9AMX3_LEIMU Putative AAA family ATPase OS=Leishmania mexic         | 6  |
| 2.184461475 | -0.43514 | E9AY79     | tr E9AY79 E9AY79_LEIMU Uncharacterized protein OS=Leishmania mexicana (s      | 2  |
| 2.432496484 | -0.43537 | E9AP62;E8M | tr E9AP62 E9AP62_LEIMU Tubulin alpha chain OS=Leishmania mexicana (strair     | 20 |
| 2.730459874 | -0.43571 | E9B2G6;E9A | tr E9B2G6 E9B2G6_LEIMU 40S ribosomal protein S2 OS=Leishmania mexicana        | 9  |
| 2.00618192  | -0.43686 | E9B632     | tr E9B632 E9B632_LEIMU Putative reiske iron-sulfur protein OS=Leishmania m    | 4  |
| 2.540285148 | -0.43823 | E9ATW0     | tr E9ATW0 E9ATW0_LEIMU Putative adaptin OS=Leishmania mexicana (strain        | 3  |
| 2.478860038 | -0.43912 | E9AK98     | tr E9AK98 E9AK98_LEIMU Putative RNA-binding protein OS=Leishmania mexic       | 4  |
| 1.446385011 | -0.43916 | E9B4E9     | tr E9B4E9 E9B4E9_LEIMU Uncharacterized protein OS=Leishmania mexicana (s      | 6  |



|             |          |            |                                                                             |    |
|-------------|----------|------------|-----------------------------------------------------------------------------|----|
| 2.548552058 | -0.43992 | E9AVS9     | tr E9AVS9 E9AVS9_LEIMU Uncharacterized protein OS=Leishmania mexicana (     | 2  |
| 1.872904505 | -0.44188 | E9ATZ6     | tr E9ATZ6 E9ATZ6_LEIMU Putative isoleucyl-tRNA synthetase OS=Leishmania n   | 11 |
| 2.473755245 | -0.44277 | E9AMI7     | tr E9AMI7 E9AMI7_LEIMU Uncharacterized protein OS=Leishmania mexicana (     | 2  |
| 2.258234066 | -0.44404 | E9AQW8     | tr E9AQW8 E9AQW8_LEIMU Uncharacterized protein OS=Leishmania mexican        | 4  |
| 1.822875193 | -0.44476 | E9AT24     | tr E9AT24 E9AT24_LEIMU Putative acid phosphatase OS=Leishmania mexicana     | 2  |
| 3.068062469 | -0.44492 | E9AXP9     | tr E9AXP9 E9AXP9_LEIMU Uncharacterized protein OS=Leishmania mexicana (     | 2  |
| 1.960700261 | -0.4457  | E9AMC2     | tr E9AMC2 E9AMC2_LEIMU Uncharacterized protein OS=Leishmania mexicana       | 5  |
| 1.95809157  | -0.44746 | E9AVJ1     | tr E9AVJ1 E9AVJ1_LEIMU Transcription factor-like protein OS=Leishmania mex  | 5  |
| 1.918115285 | -0.44876 | E9AYU0     | tr E9AYU0 E9AYU0_LEIMU Putative nucleoporin OS=Leishmania mexicana (str     | 7  |
| 1.431059433 | -0.45057 | E9AM81     | tr E9AM81 E9AM81_LEIMU Putative Qc-SNARE protein OS=Leishmania mexica       | 2  |
| 2.561275006 | -0.45196 | E9ANB3     | tr E9ANB3 E9ANB3_LEIMU RNA-binding protein-like protein OS=Leishmania m     | 5  |
| 2.123226484 | -0.45244 | E9B0P4     | tr E9B0P4 E9B0P4_LEIMU Uncharacterized protein OS=Leishmania mexicana (     | 3  |
| 2.499148408 | -0.45363 | E9ALE1     | tr E9ALE1 E9ALE1_LEIMU Uncharacterized protein OS=Leishmania mexicana (s    | 2  |
| 2.244352858 | -0.4547  | E9AUK8     | tr E9AUK8 E9AUK8_LEIMU rRNA biogenesis protein-like protein OS=Leishmani    | 8  |
| 2.749649317 | -0.45676 | E9ALY6;Q9L | tr E9ALY6 E9ALY6_LEIMU Putative ADP ribosylation factor 3 OS=Leishmania m   | 7  |
| 2.110646476 | -0.45855 | E9AZH5     | tr E9AZH5 E9AZH5_LEIMU Putative pantothenate kinase subunit OS=Leishman     | 5  |
| 2.158865366 | -0.4622  | E9ANQ5     | tr E9ANQ5 E9ANQ5_LEIMU Uncharacterized protein OS=Leishmania mexicana       | 4  |
| 2.0630423   | -0.46327 | E9AZX7     | tr E9AZX7 E9AZX7_LEIMU Putative hydrolase, alpha/beta fold family OS=Leishr | 3  |
| 1.563848706 | -0.46766 | E9APV3     | tr E9APV3 E9APV3_LEIMU Uncharacterized protein OS=Leishmania mexicana (     | 3  |
| 2.16689145  | -0.46772 | E9AN41     | tr E9AN41 E9AN41_LEIMU Protein transport protein SEC23 OS=Leishmania me     | 5  |
| 1.770508807 | -0.47084 | E9B5N2     | tr E9B5N2 E9B5N2_LEIMU Cell differentiation protein-like protein OS=Leishma | 3  |
| 1.989071222 | -0.47452 | E9AZ67     | tr E9AZ67 E9AZ67_LEIMU Uncharacterized protein OS=Leishmania mexicana (     | 5  |
| 1.966328092 | -0.47455 | E9AZ92     | tr E9AZ92 E9AZ92_LEIMU Uncharacterized protein OS=Leishmania mexicana (     | 2  |
| 2.230157587 | -0.47504 | E9AJY3;O09 | tr E9AJY3 E9AJY3_LEIMU Calcium-transporting ATPase OS=Leishmania mexicar    | 9  |
| 2.601126246 | -0.47576 | E9AYN0     | tr E9AYN0 E9AYN0_LEIMU Uncharacterized protein OS=Leishmania mexicana (     | 4  |
| 1.600357532 | -0.47597 | E9AXI5     | tr E9AXI5 E9AXI5_LEIMU Uncharacterized protein OS=Leishmania mexicana (st   | 3  |
| 2.418961436 | -0.47626 | E9AMC6     | tr E9AMC6 E9AMC6_LEIMU Putative small ubiquitin protein OS=Leishmania m     | 2  |
| 1.949090979 | -0.47668 | E9ARJ3     | tr E9ARJ3 E9ARJ3_LEIMU V-type proton ATPase subunit C OS=Leishmania mexi    | 2  |
| 2.016141211 | -0.47791 | E9AU86     | tr E9AU86 E9AU86_LEIMU Uncharacterized protein OS=Leishmania mexicana (     | 2  |
| 2.244453148 | -0.4795  | E9AYP5     | tr E9AYP5 E9AYP5_LEIMU Uncharacterized protein OS=Leishmania mexicana (     | 4  |
| 1.906223595 | -0.47998 | E9B2V9;E9B | tr E9B2V9 E9B2V9_LEIMU Superoxide dismutase OS=Leishmania mexicana (str     | 3  |
| 2.589957903 | -0.48155 | E9B038     | tr E9B038 E9B038_LEIMU Uncharacterized protein OS=Leishmania mexicana (     | 10 |
| 2.366311198 | -0.48205 | E9B423     | tr E9B423 E9B423_LEIMU Nucleolar GTP-binding protein 1 OS=Leishmania me     | 9  |
| 2.324322785 | -0.48429 | E9B376;A0A | tr E9B376 E9B376_LEIMU Nucleoside diphosphate kinase OS=Leishmania mexi     | 9  |
| 1.801505519 | -0.48448 | E9B2W2     | tr E9B2W2 E9B2W2_LEIMU Chaperonin HSP60, mitochondrial,putative OS=Lei      | 3  |
| 3.094520369 | -0.48467 | E9AQ14     | tr E9AQ14 E9AQ14_LEIMU Uncharacterized protein OS=Leishmania mexicana       | 4  |
| 1.873314438 | -0.48684 | E9B1P3;E8N | tr E9B1P3 E9B1P3_LEIMU Sodium stibogluconate resistance protein,putative C  | 3  |
| 2.187845072 | -0.48745 | E9ASZ0     | tr E9ASZ0 E9ASZ0_LEIMU Putative DEAD box RNA helicase OS=Leishmania me      | 5  |
| 2.40642098  | -0.48844 | E9B0C5     | tr E9B0C5 E9B0C5_LEIMU Uncharacterized protein LMXM_28_3030 OS=Leishn       | 10 |
| 2.805976036 | -0.48882 | Q8MPPM3;E1 | tr Q8MPPM3 Q8MPPM3_LEIME Transketolase OS=Leishmania mexicana mexicar       | 6  |
| 2.213585234 | -0.4894  | E9AXF3     | tr E9AXF3 E9AXF3_LEIMU Uncharacterized protein OS=Leishmania mexicana (     | 7  |
| 2.418529134 | -0.49219 | E9AWL7     | tr E9AWL7 E9AWL7_LEIMU Dynein intermediate-chain-like protein OS=Leishm     | 3  |
| 2.361567427 | -0.49657 | E9AR97     | tr E9AR97 E9AR97_LEIMU RNA cytidine acetyltransferase OS=Leishmania mexi    | 4  |
| 2.422090612 | -0.49788 | E9AY66;Q8E | tr E9AY66 E9AY66_LEIMU Putative 40S ribosomal protein S16 OS=Leishmania r   | 8  |
| 3.212827907 | -0.49805 | E9AWG1     | tr E9AWG1 E9AWG1_LEIMU Uncharacterized protein OS=Leishmania mexicana       | 2  |
| 2.61782969  | -0.49809 | E9AZ25     | tr E9AZ25 E9AZ25_LEIMU Uncharacterized protein OS=Leishmania mexicana (     | 10 |
| 2.008413314 | -0.49839 | E9B489     | tr E9B489 E9B489_LEIMU Uncharacterized protein OS=Leishmania mexicana (     | 4  |
| 2.911139885 | -0.49926 | E9AYQ6     | tr E9AYQ6 E9AYQ6_LEIMU CAAX prenyl protease OS=Leishmania mexicana (str     | 2  |
| 2.235463964 | -0.50044 | E9B1G7     | tr E9B1G7 E9B1G7_LEIMU Putative nucleolar protein OS=Leishmania mexicana    | 5  |
| 2.426166719 | -0.50063 | E9ASB9     | tr E9ASB9 E9ASB9_LEIMU Histone H4 OS=Leishmania mexicana (strain MHOM,      | 2  |
| 2.704299401 | -0.5017  | E9AUK2     | tr E9AUK2 E9AUK2_LEIMU Uncharacterized protein OS=Leishmania mexicana (     | 2  |
| 2.818487106 | -0.50272 | E9ASX8     | tr E9ASX8 E9ASX8_LEIMU Chaperonin HSP60, mitochondrial OS=Leishmania m      | 5  |
| 2.5961774   | -0.50563 | E9B6Q0     | tr E9B6Q0 E9B6Q0_LEIMU Uncharacterized protein OS=Leishmania mexicana (     | 10 |
| 2.319221801 | -0.50955 | E9AP27     | tr E9AP27 E9AP27_LEIMU Arginine N-methyltransferase-like protein OS=Leishr  | 4  |
| 2.187070412 | -0.51007 | E9B0H1;E9A | tr E9B0H1 E9B0H1_LEIMU Putative aspartyl-tRNA synthetase OS=Leishmania n    | 11 |
| 2.479076224 | -0.51068 | E9B1C6     | tr E9B1C6 E9B1C6_LEIMU S-adenosylmethionine synthase OS=Leishmania mex      | 9  |
| 2.590650047 | -0.51104 | E9AKL5     | tr E9AKL5 E9AKL5_LEIMU Uncharacterized protein OS=Leishmania mexicana (s    | 3  |
| 2.635770151 | -0.51182 | E9AKP2     | tr E9AKP2 E9AKP2_LEIMU Proteasome subunit beta OS=Leishmania mexicana       | 4  |
| 2.017605664 | -0.51216 | E9ATE6     | tr E9ATE6 E9ATE6_LEIMU Uncharacterized protein OS=Leishmania mexicana (     | 8  |
| 2.284714306 | -0.51353 | E9AL37     | tr E9AL37 E9AL37_LEIMU Acetylornithine deacetylase-like protein OS=Leishma  | 4  |
| 2.220184777 | -0.51361 | E9AR16     | tr E9AR16 E9AR16_LEIMU Uncharacterized protein OS=Leishmania mexicana (     | 4  |
| 3.139945807 | -0.51426 | E9AZA4     | tr E9AZA4 E9AZA4_LEIMU Uncharacterized protein OS=Leishmania mexicana (     | 2  |
| 2.383958704 | -0.51511 | E9AZU3     | tr E9AZU3 E9AZU3_LEIMU Putative p450 reductase OS=Leishmania mexicana (     | 2  |

|             |          |            |                                                                                |    |
|-------------|----------|------------|--------------------------------------------------------------------------------|----|
| 2.91115854  | -0.51587 | E9AXN4     | tr E9AXN4 E9AXN4_LEIMU Uncharacterized protein OS=Leishmania mexicana (        | 3  |
| 2.087011167 | -0.51699 | E9AKX3     | tr E9AKX3 E9AKX3_LEIMU Putative glucosamine-fructose-6-phosphate aminot        | 2  |
| 2.243129362 | -0.51705 | Q9GRT0;E9  | tr Q9GRT0 Q9GRT0_LEIME Casein kinase II alpha subunit OS=Leishmania mexic      | 2  |
| 2.762125735 | -0.51721 | E9AN60     | tr E9AN60 E9AN60_LEIMU Uncharacterized protein OS=Leishmania mexicana (        | 20 |
| 2.881307575 | -0.51809 | E9AL83     | tr E9AL83 E9AL83_LEIMU Topoisomerase-related function protein-like protein     | 2  |
| 2.979071264 | -0.52052 | E9B6R8     | tr E9B6R8 E9B6R8_LEIMU Uncharacterized protein OS=Leishmania mexicana (s       | 2  |
| 1.96724332  | -0.52229 | E9B528     | tr E9B528 E9B528_LEIMU Glycosyltransferase-like protein OS=Leishmania mex      | 3  |
| 2.262426964 | -0.52329 | E9B1R9     | tr E9B1R9 E9B1R9_LEIMU Uncharacterized protein OS=Leishmania mexicana (s       | 2  |
| 2.759728837 | -0.5236  | E9B0B0     | tr E9B0B0 E9B0B0_LEIMU Putative dynein heavy chain OS=Leishmania mexicar       | 9  |
| 2.613513112 | -0.52515 | E9ATH3     | tr E9ATH3 E9ATH3_LEIMU Adenosylhomocysteinase OS=Leishmania mexicana           | 13 |
| 2.534104048 | -0.52576 | E9AWN5;E9  | tr E9AWN5 E9AWN5_LEIMU Uncharacterized protein LMXM_24_0450 OS=Leis            | 4  |
| 2.414012812 | -0.52601 | E9AM73     | tr E9AM73 E9AM73_LEIMU Putative tryptophanyl-tRNA synthetase OS=Leishr         | 7  |
| 2.791854625 | -0.52867 | E9AQN5     | tr E9AQN5 E9AQN5_LEIMU Transaldolase OS=Leishmania mexicana (strain MH         | 6  |
| 2.312583056 | -0.53006 | E9ARY3     | tr E9ARY3 E9ARY3_LEIMU GDT1 family protein OS=Leishmania mexicana (strai       | 2  |
| 2.417330743 | -0.53197 | E9AQA0     | tr E9AQA0 E9AQA0_LEIMU NAD-specific glutamate dehydrogenase OS=Leishm          | 23 |
| 2.544626077 | -0.53237 | E9ASK9     | tr E9ASK9 E9ASK9_LEIMU Eukaryotic translation initiation factor 6 OS=Leishma   | 3  |
| 2.628373904 | -0.53361 | E9B5H5     | tr E9B5H5 E9B5H5_LEIMU Uncharacterized protein OS=Leishmania mexicana (        | 3  |
| 2.434161345 | -0.53395 | E9AZQ9     | tr E9AZQ9 E9AZQ9_LEIMU Uncharacterized protein OS=Leishmania mexicana (        | 6  |
| 2.30796982  | -0.53485 | E9B052     | tr E9B052 E9B052_LEIMU Eukaryotic translation initiation factor 3 subunit E O' | 9  |
| 2.02286562  | -0.53602 | E9AYV2     | tr E9AYV2 E9AYV2_LEIMU Putative calpain-like cysteine peptidase OS=Leishma     | 2  |
| 2.416732819 | -0.53664 | E9ASM7     | tr E9ASM7 E9ASM7_LEIMU Putative ribosomal protein L24 OS=Leishmania me         | 3  |
| 2.585920607 | -0.53795 | E9AZS9     | tr E9AZS9 E9AZS9_LEIMU Uncharacterized protein OS=Leishmania mexicana (s       | 7  |
| 2.375785361 | -0.5385  | E9ALIO     | tr E9ALIO E9ALIO_LEIMU Phosphodiesterase OS=Leishmania mexicana (strain N      | 2  |
| 2.182113556 | -0.53998 | E9ALZ8     | tr E9ALZ8 E9ALZ8_LEIMU Uncharacterized protein OS=Leishmania mexicana (s       | 2  |
| 2.451543663 | -0.54207 | E9AUH1     | tr E9AUH1 E9AUH1_LEIMU Uncharacterized protein OS=Leishmania mexicana          | 2  |
| 2.626984286 | -0.54271 | E9AMC3     | tr E9AMC3 E9AMC3_LEIMU Uncharacterized protein OS=Leishmania mexicana          | 5  |
| 3.12320698  | -0.54369 | E9B4J8     | tr E9B4J8 E9B4J8_LEIMU Uncharacterized protein OS=Leishmania mexicana (st      | 6  |
| 2.657243122 | -0.54381 | E9B406     | tr E9B406 E9B406_LEIMU DNA polymerase OS=Leishmania mexicana (strain M         | 2  |
| 2.940252193 | -0.5448  | E9AXI9     | tr E9AXI9 E9AXI9_LEIMU DNAj-like protein OS=Leishmania mexicana (strain MI     | 3  |
| 2.673477162 | -0.54485 | E9B6K2     | tr E9B6K2 E9B6K2_LEIMU Putative cystathione gamma lyase OS=Leishmania m        | 11 |
| 2.506135057 | -0.54784 | E9ASQ3     | tr E9ASQ3 E9ASQ3_LEIMU Putative N-acetyltransferase subunit Nat1 OS=Leish      | 9  |
| 2.593064131 | -0.54926 | E9B6T1     | tr E9B6T1 E9B6T1_LEIMU RNA helicase OS=Leishmania mexicana (strain MHOI        | 3  |
| 2.656754354 | -0.54947 | E9ALW2     | tr E9ALW2 E9ALW2_LEIMU Uncharacterized protein OS=Leishmania mexicana          | 5  |
| 1.858327442 | -0.54952 | E9B4M8     | tr E9B4M8 E9B4M8_LEIMU Uncharacterized protein OS=Leishmania mexicana          | 2  |
| 2.94781028  | -0.54976 | E9B260;Q25 | tr E9B260 E9B260_LEIMU DNA-directed RNA polymerase subunit OS=Leishmar         | 8  |
| 2.171845746 | -0.54996 | E9ALG7     | tr E9ALG7 E9ALG7_LEIMU Putative serine/threonine-protein kinase OS=Leishr      | 3  |
| 2.863455899 | -0.55089 | E9AKM1     | tr E9AKM1 E9AKM1_LEIMU V-type proton ATPase subunit OS=Leishmania mex          | 3  |
| 2.943473851 | -0.55207 | E9AW96     | tr E9AW96 E9AW96_LEIMU Actin interacting protein-like protein OS=Leishmar      | 2  |
| 3.433073438 | -0.55622 | E9AX29     | tr E9AX29 E9AX29_LEIMU Putative lysophospholipase OS=Leishmania mexican        | 2  |
| 2.994730667 | -0.55774 | E9AJW8     | tr E9AJW8 E9AJW8_LEIMU Uncharacterized protein OS=Leishmania mexicana          | 2  |
| 1.939496179 | -0.55961 | E9AS02     | tr E9AS02 E9AS02_LEIMU Uncharacterized protein OS=Leishmania mexicana (s       | 2  |
| 2.830158875 | -0.55979 | E9ARX7     | tr E9ARX7 E9ARX7_LEIMU Kinesin-like protein OS=Leishmania mexicana (strair     | 6  |
| 2.397866344 | -0.55989 | E9AW21     | tr E9AW21 E9AW21_LEIMU Putative endoribonuclease L-PSP (Pb5) OS=Leishm         | 3  |
| 2.549602117 | -0.5635  | E9AP70     | tr E9AP70 E9AP70_LEIMU Uncharacterized protein OS=Leishmania mexicana (s       | 2  |
| 2.936860871 | -0.56453 | E9AJZ0     | tr E9AJZ0 E9AJZ0_LEIMU DNA topoisomerase type IB small subunit OS=Leishm       | 8  |
| 2.512828172 | -0.5651  | E9B2V7     | tr E9B2V7 E9B2V7_LEIMU Uncharacterized protein OS=Leishmania mexicana (s       | 2  |
| 3.176011488 | -0.56603 | E9AJK7     | tr E9AJK7 E9AJK7_LEIMU Uncharacterized protein OS=Leishmania mexicana (s       | 5  |
| 2.290839608 | -0.56689 | E9B1K4     | tr E9B1K4 E9B1K4_LEIMU Putative ATP-binding cassette protein subfamily D, r    | 3  |
| 3.405303342 | -0.56782 | E9B028     | tr E9B028 E9B028_LEIMU Putative mitochondrial DEAD box protein OS=Leishr       | 2  |
| 2.939488454 | -0.56902 | E9B1G4     | tr E9B1G4 E9B1G4_LEIMU DNA-directed RNA polymerase subunit beta OS=Lei         | 4  |
| 2.920210822 | -0.57197 | E9ASS0     | tr E9ASS0 E9ASS0_LEIMU Uncharacterized protein OS=Leishmania mexicana (s       | 5  |
| 1.676631498 | -0.57274 | E9AJ91     | tr E9AJ91 E9AJ91_LEIMU Putative carboxylase OS=Leishmania mexicana (strair     | 2  |
| 2.679424228 | -0.57335 | E9AU61     | tr E9AU61 E9AU61_LEIMU Putative chaperone protein DNAj OS=Leishmania m         | 4  |
| 2.931411611 | -0.57387 | E9APV2     | tr E9APV2 E9APV2_LEIMU Putative dynein heavy chain OS=Leishmania mexica        | 2  |
| 2.258599999 | -0.57414 | E9AXX0     | tr E9AXX0 E9AXX0_LEIMU Uncharacterized protein OS=Leishmania mexicana (s       | 2  |
| 2.622180005 | -0.57435 | E9B2E8     | tr E9B2E8 E9B2E8_LEIMU Uncharacterized protein OS=Leishmania mexicana (s       | 13 |
| 2.715858061 | -0.57523 | E9AXJ1     | tr E9AXJ1 E9AXJ1_LEIMU Aldehyde dehydrogenase, mitochondrial OS=Leishma        | 10 |
| 2.950137027 | -0.57962 | E9B6S8     | tr E9B6S8 E9B6S8_LEIMU Uncharacterized protein (Map kinase kinase-like pro     | 2  |
| 2.375546538 | -0.58146 | E9B6I6     | tr E9B6I6 E9B6I6_LEIMU Uncharacterized protein OS=Leishmania mexicana (st      | 2  |
| 3.233867623 | -0.58234 | E9B1B8     | tr E9B1B8 E9B1B8_LEIMU Uncharacterized protein OS=Leishmania mexicana (s       | 4  |
| 2.425582013 | -0.5832  | E9AZC8     | tr E9AZC8 E9AZC8_LEIMU Putative ribosomal protein L11 OS=Leishmania mexi       | 2  |
| 2.076859238 | -0.58356 | E9B760     | tr E9B760 E9B760_LEIMU Uncharacterized protein OS=Leishmania mexicana (s       | 6  |
| 2.546404053 | -0.58538 | E9B0K3     | tr E9B0K3 E9B0K3_LEIMU Uncharacterized protein OS=Leishmania mexicana (s       | 6  |



|                             |                          |                        |                                                                                            |                    |
|-----------------------------|--------------------------|------------------------|--------------------------------------------------------------------------------------------|--------------------|
| 3.061418993                 | -0.58801                 | E9B6A7                 | tr E9B6A7 E9B6A7_LEIMU ATP-dependent RNA helicase-like protein OS=Leishr                   | 3                  |
| 2.861758928                 | -0.58859                 | E9B047                 | tr E9B047 E9B047_LEIMU Putative glycosomal membrane protein OS=Leishma                     | 3                  |
| 2.208530692                 | -0.58912                 | E9B5K8                 | tr E9B5K8 E9B5K8_LEIMU Uncharacterized protein OS=Leishmania mexicana (s                   | 6                  |
| 2.645619736                 | -0.59095                 | E9AXH6                 | tr E9AXH6 E9AXH6_LEIMU Putative dynein heavy chain OS=Leishmania mexica                    | 42                 |
| 3.227466522                 | -0.59128                 | Q95PT4;E9A             | tr Q95PT4 Q95PT4_LEIME Myo-inositol-1-phosphate synthase OS=Leishmania                     | 6                  |
| 4.042447956                 | -0.59217                 | E9AXP0                 | tr E9AXP0 E9AXP0_LEIMU Uncharacterized protein OS=Leishmania mexicana (s                   | 2                  |
| 2.457650434                 | -0.59313                 | E9B5C7                 | tr E9B5C7 E9B5C7_LEIMU Glucose-6-phosphate 1-epimerase OS=Leishmania n                     | 4                  |
| 3.085817733                 | -0.59717                 | E9AYQ7                 | tr E9AYQ7 E9AYQ7_LEIMU RNA helicase OS=Leishmania mexicana (strain MHC                     | 2                  |
| 2.678731746                 | -0.59846                 | E9ALL2                 | tr E9ALL2 E9ALL2_LEIMU Uncharacterized protein OS=Leishmania mexicana (s                   | 2                  |
| 3.563822537                 | -0.59898                 | E9APR2                 | tr E9APR2 E9APR2_LEIMU Elongation of fatty acids protein OS=Leishmania me                  | 2                  |
| 2.785276021                 | -0.59953                 | E9B478                 | tr E9B478 E9B478_LEIMU Putative heat shock protein OS=Leishmania mexican                   | 18                 |
| 3.805643873                 | -0.60012                 | E9ALF3                 | tr E9ALF3 E9ALF3_LEIMU Uncharacterized protein OS=Leishmania mexicana (s                   | 2                  |
| 2.921704451                 | -0.60016                 | E9APS7                 | tr E9APS7 E9APS7_LEIMU Uncharacterized protein OS=Leishmania mexicana (s                   | 2                  |
| <a href="#">2.382340392</a> | <a href="#">-0.60094</a> | <a href="#">E9AZZ2</a> | <a href="#">tr E9AZZ2 E9AZZ2_LEIMU Proteasome regulatory non-ATP-ase subunit 2,putat</a>   | <a href="#">6</a>  |
| 2.907830938                 | -0.60117                 | E9B4W0                 | tr E9B4W0 E9B4W0_LEIMU Uncharacterized protein OS=Leishmania mexicana                      | 7                  |
| 2.809452469                 | -0.60209                 | E9ASX7                 | tr E9ASX7 E9ASX7_LEIMU Chaperonin HSP60, mitochondrial OS=Leishmania m                     | 10                 |
| 2.476424248                 | -0.60289                 | E9AUT3                 | tr E9AUT3 E9AUT3_LEIMU Uncharacterized protein OS=Leishmania mexicana (                    | 3                  |
| 2.495502327                 | -0.60385                 | E9AX93                 | tr E9AX93 E9AX93_LEIMU Cleavage and polyadenylation specificity factor sub                 | 4                  |
| 2.498683486                 | -0.60429                 | E9B191                 | tr E9B191 E9B191_LEIMU Uncharacterized protein OS=Leishmania mexicana (s                   | 3                  |
| 2.71332436                  | -0.60498                 | E9AX57                 | tr E9AX57 E9AX57_LEIMU Uncharacterized protein OS=Leishmania mexicana (s                   | 9                  |
| 3.332180366                 | -0.60563                 | E9B5D2                 | tr E9B5D2 E9B5D2_LEIMU Cleavage and polyadenylation specificity factor,puta                | 3                  |
| 2.301879827                 | -0.6059                  | E9AVY2                 | tr E9AVY2 E9AVY2_LEIMU Putative ATP-dependent DEAD/H RNA helicase OS=l                     | 7                  |
| 2.327005562                 | -0.60946                 | E9B2Q9                 | tr E9B2Q9 E9B2Q9_LEIMU Cleavage and polyadenylation specificity factor-like                | 7                  |
| 2.503112685                 | -0.61145                 | E9AW08                 | tr E9AW08 E9AW08_LEIMU Uncharacterized protein OS=Leishmania mexicana                      | 11                 |
| 2.140800617                 | -0.61206                 | E9AX44                 | tr E9AX44 E9AX44_LEIMU Uncharacterized protein OS=Leishmania mexicana (s                   | 2                  |
| 2.947565705                 | -0.61526                 | E9B2V1                 | tr E9B2V1 E9B2V1_LEIMU Uncharacterized protein OS=Leishmania mexicana (s                   | 7                  |
| 2.688327374                 | -0.61581                 | E9AL32                 | tr E9AL32 E9AL32_LEIMU Uncharacterized protein OS=Leishmania mexicana (s                   | 4                  |
| 2.283537571                 | -0.61795                 | E9AXT4                 | tr E9AXT4 E9AXT4_LEIMU Uncharacterized protein OS=Leishmania mexicana (s                   | 2                  |
| 2.290570435                 | -0.61802                 | E9AVM2                 | tr E9AVM2 E9AVM2_LEIMU Uncharacterized protein OS=Leishmania mexicana                      | 6                  |
| <a href="#">3.043929767</a> | <a href="#">-0.61806</a> | <a href="#">E9ASE2</a> | <a href="#">tr E9ASE2 E9ASE2_LEIMU eIF3-interacting protein-like protein OS=Leishmania</a> | <a href="#">11</a> |
| 2.809687786                 | -0.61962                 | E9AUA1;Q8              | tr E9AUA1 E9AUA1_LEIMU 2,3-bisphosphoglycerate-independent phosphoglyc                     | 9                  |
| 2.520890832                 | -0.62049                 | E9AU90                 | tr E9AU90 E9AU90_LEIMU Similarity to endo-1-like protein OS=Leishmania me                  | 3                  |
| 2.358095965                 | -0.6215                  | E9AVN0                 | tr E9AVN0 E9AVN0_LEIMU Uncharacterized protein OS=Leishmania mexicana                      | 4                  |
| 3.59999097                  | -0.62214                 | E9B5Z2;E9B             | tr E9B5Z2 E9B5Z2_LEIMU Oligosaccharyl transferase-like protein OS=Leishman                 | 3                  |
| 3.21694525                  | -0.62468                 | E9APH6                 | tr E9APH6 E9APH6_LEIMU Uncharacterized protein OS=Leishmania mexicana (                    | 2                  |
| <a href="#">2.540335363</a> | <a href="#">-0.6247</a>  | <a href="#">E9ANU8</a> | <a href="#">tr E9ANU8 E9ANU8_LEIMU Proteasome regulatory ATPase subunitcc118.3,put</a>     | <a href="#">3</a>  |
| 4.049884025                 | -0.62535                 | E9AK09                 | tr E9AK09 E9AK09_LEIMU Uncharacterized protein OS=Leishmania mexicana (s                   | 2                  |
| 2.966490753                 | -0.62828                 | E9AYZ0                 | tr E9AYZ0 E9AYZ0_LEIMU Putative 2-oxoglutarate dehydrogenase subunit OS=                   | 7                  |
| 2.521235839                 | -0.62981                 | E9B6L0                 | tr E9B6L0 E9B6L0_LEIMU Uncharacterized protein OS=Leishmania mexicana (s                   | 6                  |
| 3.306910269                 | -0.63014                 | E9ALJ3                 | tr E9ALJ3 E9ALJ3_LEIMU Enoyl-CoA hydratase/isomerase-like protein OS=Leish                 | 3                  |
| 2.072218512                 | -0.63325                 | E9B1M3                 | tr E9B1M3 E9B1M3_LEIMU Uncharacterized protein OS=Leishmania mexicana                      | 3                  |
| 2.5803723                   | -0.6346                  | E9AZ13                 | tr E9AZ13 E9AZ13_LEIMU Mitochondrial RNA binding protein 1 OS=Leishmania                   | 3                  |
| 3.110420872                 | -0.63512                 | E9AVH3                 | tr E9AVH3 E9AVH3_LEIMU Putative ATP synthase F1 subunit gamma protein O                    | 6                  |
| 1.838000505                 | -0.63538                 | E9B1B1                 | tr E9B1B1 E9B1B1_LEIMU Putative calmodulin-related protein OS=Leishmania                   | 5                  |
| 2.64860536                  | -0.63629                 | E9AMU6                 | tr E9AMU6 E9AMU6_LEIMU Uncharacterized protein OS=Leishmania mexicana                      | 2                  |
| 2.61583031                  | -0.6365                  | E9AKA4;C6K             | tr E9AKA4 E9AKA4_LEIMU Actin OS=Leishmania mexicana (strain MHOM/GT/2                      | 6                  |
| 2.94106327                  | -0.6365                  | E9ASP6;Q9L             | tr E9ASP6 E9ASP6_LEIMU Fructose-bisphosphate aldolase OS=Leishmania mex                    | 11                 |
| 2.970015039                 | -0.63681                 | E9AQX4                 | tr E9AQX4 E9AQX4_LEIMU Putative prohibitin OS=Leishmania mexicana (strair                  | 3                  |
| 2.953933804                 | -0.63915                 | E9B520                 | tr E9B520 E9B520_LEIMU Putative asparaginyl-tRNA synthetase OS=Leishmani                   | 8                  |
| 2.342008539                 | -0.63981                 | E9B4K7                 | tr E9B4K7 E9B4K7_LEIMU Uncharacterized protein (Fragment) OS=Leishmania                    | 3                  |
| 2.017370766                 | -0.6406                  | E9AY60;E9A             | tr E9AY60 E9AY60_LEIMU Glutathione peroxidase OS=Leishmania mexicana (s                    | 2                  |
| 2.198720064                 | -0.644                   | E9ARY1                 | tr E9ARY1 E9ARY1_LEIMU Putative RNA binding protein OS=Leishmania mexic                    | 3                  |
| 2.092586594                 | -0.64642                 | E9B6C8                 | tr E9B6C8 E9B6C8_LEIMU Uncharacterized protein OS=Leishmania mexicana (s                   | 3                  |
| 2.411570806                 | -0.64718                 | E9AS04                 | tr E9AS04 E9AS04_LEIMU Uncharacterized protein OS=Leishmania mexicana (s                   | 2                  |
| 2.949296133                 | -0.64758                 | E9ATW8                 | tr E9ATW8 E9ATW8_LEIMU Uncharacterized protein OS=Leishmania mexicana                      | 10                 |
| 2.52152246                  | -0.64876                 | E9B258                 | tr E9B258 E9B258_LEIMU Uncharacterized protein OS=Leishmania mexicana (s                   | 5                  |
| 2.701282828                 | -0.64993                 | E9ANZ4                 | tr E9ANZ4 E9ANZ4_LEIMU Cytochrome c oxidase subunit IV OS=Leishmania m                     | 6                  |
| 2.398926868                 | -0.65244                 | E9AX96                 | tr E9AX96 E9AX96_LEIMU Uncharacterized protein OS=Leishmania mexicana (s                   | 4                  |
| 2.939941276                 | -0.65443                 | E9AUV0                 | tr E9AUV0 E9AUV0_LEIMU Soluble n-ethylmaleimide sensitive factor,putative                  | 3                  |
| 2.63818313                  | -0.65666                 | E9B6C2                 | tr E9B6C2 E9B6C2_LEIMU Putative phosphoinositide-binding protein OS=Leish                  | 2                  |
| 2.845880666                 | -0.65716                 | E9APV8;E8M             | tr E9APV8 E9APV8_LEIMU Putative kinesin K39 OS=Leishmania mexicana (strai                  | 4                  |
| 3.252670701                 | -0.65727                 | E9ALL3                 | tr E9ALL3 E9ALL3_LEIMU Uncharacterized protein OS=Leishmania mexicana (s                   | 3                  |
| 2.914746794                 | -0.66486                 | E9AJY9                 | tr E9AJY9 E9AJY9_LEIMU Uncharacterized protein OS=Leishmania mexicana (s                   | 4                  |

|                    |                 |                   |                                                                                       |           |
|--------------------|-----------------|-------------------|---------------------------------------------------------------------------------------|-----------|
| 2.880724135        | -0.66567        | E9B235            | tr E9B235 E9B235_LEIMU Uncharacterized protein OS=Leishmania mexicana (s              | 4         |
| <b>2.5501121</b>   | <b>-0.66659</b> | <b>E9AL62;E9A</b> | <b>tr E9AL62 E9AL62_LEIMU Putative 60S ribosomal protein L7a OS=Leishmania n</b>      | <b>13</b> |
| 2.67232997         | -0.66912        | E9B0S3            | tr E9B0S3 E9B0S3_LEIMU Putative kinesin OS=Leishmania mexicana (strain MH             | 5         |
| 2.561276775        | -0.67051        | E9AUS4            | tr E9AUS4 E9AUS4_LEIMU Coatomer subunit beta OS=Leishmania mexicana (s                | 9         |
| 2.907689876        | -0.67128        | E9ATF1            | tr E9ATF1 E9ATF1_LEIMU Uncharacterized protein OS=Leishmania mexicana (s              | 2         |
| 3.451415824        | -0.67224        | E9ATL1            | tr E9ATL1 E9ATL1_LEIMU Uncharacterized protein OS=Leishmania mexicana (s              | 3         |
| 3.175141558        | -0.6725         | E9B405;AOA        | tr E9B405 E9B405_LEIMU Thiamine biosynthesis-like protein OS=Leishmania r             | 4         |
| 2.725948901        | -0.67276        | E9ARY4            | tr E9ARY4 E9ARY4_LEIMU Intraflagellar transport protein component,putative            | 5         |
| 2.972137159        | -0.67569        | E9B1S0            | tr E9B1S0 E9B1S0_LEIMU Putative vacuolar-type proton translocating pyropho            | 10        |
| <b>3.28038193</b>  | <b>-0.67606</b> | <b>E9B178</b>     | <b>tr E9B178 E9B178_LEIMU Eukaryotic translation initiation factor 3 subunit 7-li</b> | <b>4</b>  |
| 2.470804031        | -0.67682        | E9AS17            | tr E9AS17 E9AS17_LEIMU Uncharacterized protein OS=Leishmania mexicana (s              | 10        |
| 2.971689115        | -0.67866        | Q25332;Q2         | tr Q25332 Q25332_LEIME Secreted acid phosphatase 1 (SAP1) OS=Leishmania               | 7         |
| 3.630632443        | -0.67918        | E9AJF2            | tr E9AJF2 E9AJF2_LEIMU Mitochondrial processing peptide beta subunit,putati           | 2         |
| 3.14026444         | -0.6794         | E9ASC5            | tr E9ASC5 E9ASC5_LEIMU Stress-inducible protein STI1 homolog OS=Leishman              | 8         |
| 2.408043977        | -0.68046        | E9B5N7            | tr E9B5N7 E9B5N7_LEIMU Uncharacterized protein OS=Leishmania mexicana (               | 3         |
| 3.14472146         | -0.68058        | E9AVX3            | tr E9AVX3 E9AVX3_LEIMU Putative centriin (Ca2+-binding ef-hand protein) OS=           | 3         |
| 3.460420271        | -0.6814         | E9ARY5            | tr E9ARY5 E9ARY5_LEIMU Uncharacterized protein OS=Leishmania mexicana (s              | 5         |
| 3.070616376        | -0.68181        | E9APV6            | tr E9APV6 E9APV6_LEIMU Putative kinesin K39 OS=Leishmania mexicana (strai             | 2         |
| 3.014548445        | -0.6821         | E9B1L9            | tr E9B1L9 E9B1L9_LEIMU Uncharacterized protein OS=Leishmania mexicana (s              | 4         |
| 3.151005718        | -0.68267        | E9B4X4            | tr E9B4X4 E9B4X4_LEIMU Uncharacterized protein OS=Leishmania mexicana (s              | 5         |
| 3.18060621         | -0.68444        | E9AZ28            | tr E9AZ28 E9AZ28_LEIMU Uncharacterized protein OS=Leishmania mexicana (s              | 3         |
| <b>3.013250352</b> | <b>-0.68487</b> | <b>E9AMV9;E9</b>  | <b>tr E9AMV9 E9AMV9_LEIMU Putative eukaryotic translation initiation factor 2 s</b>   | <b>11</b> |
| 2.165698462        | -0.68667        | E9AT19            | tr E9AT19 E9AT19_LEIMU Dipeptidyl-peptidase 8-like serine peptidase,putativ           | 2         |
| 2.671684511        | -0.68668        | E9B3A4            | tr E9B3A4 E9B3A4_LEIMU Uncharacterized protein OS=Leishmania mexicana (s              | 2         |
| 2.734647341        | -0.68792        | E9AMC0            | tr E9AMC0 E9AMC0_LEIMU Uncharacterized protein OS=Leishmania mexicana                 | 2         |
| 3.072584907        | -0.68821        | E9AYD6            | tr E9AYD6 E9AYD6_LEIMU Putative thimet oligopeptidase (Metallo-peptidase,             | 7         |
| 2.917511444        | -0.69053        | E9AP50            | tr E9AP50 E9AP50_LEIMU Uncharacterized protein OS=Leishmania mexicana (s              | 9         |
| 3.193122482        | -0.69101        | E9APK7;AOA        | tr E9APK7 E9APK7_LEIMU Nucleoside hydrolase-like protein OS=Leishmania m              | 3         |
| 2.98561104         | -0.69128        | E9AQ19            | tr E9AQ19 E9AQ19_LEIMU Putative 60S ribosomal protein L13a OS=Leishmani               | 7         |
| 2.544238918        | -0.69146        | E9B3P4            | tr E9B3P4 E9B3P4_LEIMU Uncharacterized protein OS=Leishmania mexicana (s              | 2         |
| 3.278880738        | -0.69236        | E9AM17            | tr E9AM17 E9AM17_LEIMU Uncharacterized protein OS=Leishmania mexicana                 | 2         |
| 3.002802381        | -0.69253        | E9B612            | tr E9B612 E9B612_LEIMU Uncharacterized protein OS=Leishmania mexicana (s              | 4         |
| 2.671078162        | -0.69444        | E9AUN0            | tr E9AUN0 E9AUN0_LEIMU Uncharacterized protein OS=Leishmania mexicana                 | 2         |
| 3.204519993        | -0.69447        | E9AN72            | tr E9AN72 E9AN72_LEIMU Uncharacterized protein OS=Leishmania mexicana (               | 5         |
| 2.529795311        | -0.69826        | E9AVC7            | tr E9AVC7 E9AVC7_LEIMU 2-oxoisovalerate dehydrogenase subunit alpha OS=               | 3         |
| 3.323503486        | -0.70431        | E9AP95            | tr E9AP95 E9AP95_LEIMU Uncharacterized protein OS=Leishmania mexicana (s              | 3         |
| 2.767209628        | -0.70447        | E9ARN6            | tr E9ARN6 E9ARN6_LEIMU UTP--glucose-1-phosphate uridylyltransferase OS=L              | 2         |
| 3.189512243        | -0.70454        | E9API4            | tr E9API4 E9API4_LEIMU Uncharacterized protein OS=Leishmania mexicana (st             | 2         |
| 3.488841755        | -0.70571        | E9AZA2            | tr E9AZA2 E9AZA2_LEIMU Putative rRNA methyltransferase OS=Leishmania m                | 7         |
| 2.681528071        | -0.70711        | E9APF9            | tr E9APF9 E9APF9_LEIMU Uncharacterized protein OS=Leishmania mexicana (s              | 3         |
| 4.157560418        | -0.70941        | E9B602            | tr E9B602 E9B602_LEIMU Putative short chain dehydrogenase OS=Leishmania               | 2         |
| 3.290273362        | -0.70968        | E9B637            | tr E9B637 E9B637_LEIMU Uncharacterized protein OS=Leishmania mexicana (s              | 2         |
| 2.412946903        | -0.71055        | E9AL16            | tr E9AL16 E9AL16_LEIMU Putative cytochrome c1, heme protein, mitochondria             | 3         |
| 2.604660211        | -0.713          | E9AJH6            | tr E9AJH6 E9AJH6_LEIMU Uncharacterized protein OS=Leishmania mexicana (s              | 2         |
| <b>3.139858995</b> | <b>-0.71374</b> | <b>E9B4K3</b>     | <b>tr E9B4K3 E9B4K3_LEIMU Eukaryotic translation initiation factor 5,putative OS</b>  | <b>5</b>  |
| 2.570932086        | -0.71463        | E9AV43            | tr E9AV43 E9AV43_LEIMU Uncharacterized protein OS=Leishmania mexicana (               | 3         |
| 2.398334707        | -0.7161         | E9ATP9            | tr E9ATP9 E9ATP9_LEIMU Ribosome assembly factor mrt4 OS=Leishmania mex                | 4         |
| 2.445522667        | -0.71721        | E9ALS6            | tr E9ALS6 E9ALS6_LEIMU Uncharacterized protein OS=Leishmania mexicana (s              | 5         |
| 2.949913697        | -0.71744        | E9ATX7            | tr E9ATX7 E9ATX7_LEIMU Putative branch point binding protein OS=Leishmani             | 2         |
| 3.549314881        | -0.71909        | E9B428            | tr E9B428 E9B428_LEIMU Uncharacterized protein OS=Leishmania mexicana (s              | 4         |
| 3.473377874        | -0.72016        | E9ANZ0            | tr E9ANZ0 E9ANZ0_LEIMU Putative alanine aminotransferase OS=Leishmania r              | 4         |
| <b>3.034671818</b> | <b>-0.72031</b> | <b>E9B4Q3;E9E</b> | <b>tr E9B4Q3 E9B4Q3_LEIMU Elongation factor 1-beta OS=Leishmania mexicana (</b>       | <b>5</b>  |
| 2.995944325        | -0.72039        | E9ALS3            | tr E9ALS3 E9ALS3_LEIMU Uncharacterized protein OS=Leishmania mexicana (s              | 3         |
| 4.464797794        | -0.72111        | E9AJI9            | tr E9AJI9 E9AJI9_LEIMU Small GTP binding protein rab6-like protein OS=Leishr          | 2         |
| 3.1875335          | -0.72398        | E9B493            | tr E9B493 E9B493_LEIMU Putative carboxypeptidase OS=Leishmania mexicana               | 5         |
| 2.449674401        | -0.72405        | E9ANI7            | tr E9ANI7 E9ANI7_LEIMU Ribosome biogenesis protein BOP1 homolog OS=Leis               | 2         |
| 3.081789487        | -0.72603        | E9AL58            | tr E9AL58 E9AL58_LEIMU Uncharacterized protein OS=Leishmania mexicana (s              | 6         |
| 4.081638062        | -0.72622        | E9B6F2            | tr E9B6F2 E9B6F2_LEIMU Putative acyl-CoA dehydrogenase OS=Leishmania m                | 3         |
| 3.002945029        | -0.72922        | E9AR24            | tr E9AR24 E9AR24_LEIMU Putative RNA-binding protein OS=Leishmania mexic               | 3         |
| 3.210740015        | -0.73202        | E9AUC5            | tr E9AUC5 E9AUC5_LEIMU Putative nuclear pore complex protein (NUP155) O'              | 3         |
| <b>3.266057292</b> | <b>-0.73214</b> | <b>E9AJY2;AOA</b> | <b>tr E9AJY2 E9AJY2_LEIMU Elongation initiation factor 2 alpha subunit,putative C</b> | <b>12</b> |
| <b>3.178584181</b> | <b>-0.73749</b> | <b>E9B665</b>     | <b>tr E9B665 E9B665_LEIMU Putative 60S ribosomal protein L5 OS=Leishmania m</b>       | <b>8</b>  |
| 2.522741275        | -0.73763        | E9AQC4            | tr E9AQC4 E9AQC4_LEIMU Uncharacterized protein OS=Leishmania mexicana                 | 4         |

|             |          |            |                        |                                                       |    |
|-------------|----------|------------|------------------------|-------------------------------------------------------|----|
| 3.134314629 | -0.73841 | E9B307     | tr E9B307 E9B307_LEIMU | Uncharacterized protein OS=Leishmania mexicana (s     | 3  |
| 3.261750594 | -0.73868 | E9API5;E9A | tr E9API5 E9API5_LEIMU | Kinesin-like protein OS=Leishmania mexicana (strain I | 3  |
| 3.333822182 | -0.73954 | E9AZ89;A5J | tr E9AZ89 E9AZ89_LEIMU | Putative trypanothione synthetase OS=Leishmania n     | 4  |
| 3.621690033 | -0.74013 | E9B552     | tr E9B552 E9B552_LEIMU | RuvB-like helicase OS=Leishmania mexicana (strain M   | 3  |
| 3.252559319 | -0.74028 | E9AMI2     | tr E9AMI2 E9AMI2_LEIMU | Uncharacterized protein OS=Leishmania mexicana (      | 4  |
| 2.780060408 | -0.74058 | E9B5F7     | tr E9B5F7 E9B5F7_LEIMU | Transmembrane 9 superfamily member OS=Leishma         | 2  |
| 3.095051865 | -0.74264 | E9B5S0     | tr E9B5S0 E9B5S0_LEIMU | Putative serine palmitoyltransferase OS=Leishmania    | 3  |
| 3.224058202 | -0.74375 | E9API9     | tr E9API9 E9API9_LEIMU | Putative dynein heavy chain OS=Leishmania mexicana    | 43 |
| 2.512654782 | -0.74407 | E9AVX7     | tr E9AVX7 E9AVX7_LEIMU | Peptidyl-prolyl cis-trans isomerase OS=Leishmania r   | 2  |
| 3.583445153 | -0.74693 | E9APW9     | tr E9APW9 E9APW9_LEIMU | Uncharacterized protein OS=Leishmania mexicana        | 8  |
| 3.121316111 | -0.74956 | E9APE7;E9A | tr E9APE7 E9APE7_LEIMU | 40S ribosomal protein S4 OS=Leishmania mexicana (     | 10 |
| 2.839358031 | -0.75209 | E9B0G2     | tr E9B0G2 E9B0G2_LEIMU | Putative phosphatase 2C OS=Leishmania mexicana        | 6  |
| 2.788768164 | -0.75281 | E9AKE4     | tr E9AKE4 E9AKE4_LEIMU | Putative microtubule-associated protein (Fragment)    | 3  |
| 3.310235152 | -0.75354 | E9B2X4     | tr E9B2X4 E9B2X4_LEIMU | Putative 1-acyl-sn-glycerol-3-phosphateacyltransfer   | 3  |
| 3.092495791 | -0.75683 | Q9NGK2;E9  | tr Q9NGK2 Q9NGK2_LEIAM | 40S ribosomal protein S24 OS=Leishmania amazon        | 5  |
| 3.59500911  | -0.75707 | E9AX09     | tr E9AX09 E9AX09_LEIMU | Fatty acyl-CoA reductase OS=Leishmania mexicana (     | 3  |
| 3.418103293 | -0.75737 | E9ATK7     | tr E9ATK7 E9ATK7_LEIMU | Uncharacterized protein OS=Leishmania mexicana (s     | 10 |
| 3.041296608 | -0.75869 | E9ASA6     | tr E9ASA6 E9ASA6_LEIMU | Peptidylprolyl isomerase OS=Leishmania mexicana (     | 4  |
| 2.916991315 | -0.75902 | E9B0J1     | tr E9B0J1 E9B0J1_LEIMU | Uncharacterized protein OS=Leishmania mexicana (st    | 2  |
| 2.986501204 | -0.75992 | E9B3L9     | tr E9B3L9 E9B3L9_LEIMU | Putative DNA mismatch repair protein OS=Leishmani     | 2  |
| 3.183077617 | -0.76019 | E9B3H7     | tr E9B3H7 E9B3H7_LEIMU | Putative GIPL galf transferase OS=Leishmania mexic    | 9  |
| 2.669872924 | -0.76081 | E9AP43     | tr E9AP43 E9AP43_LEIMU | Putative carboxypeptidase (Metallo-peptidase, clan    | 5  |
| 2.893742885 | -0.76147 | E9AVR1     | tr E9AVR1 E9AVR1_LEIMU | Putative NADH-cytochrome b5 reductase OS=Leishr       | 6  |
| 2.957532247 | -0.76151 | E9AK37     | tr E9AK37 E9AK37_LEIMU | Uncharacterized protein OS=Leishmania mexicana (s     | 3  |
| 3.220804265 | -0.7625  | E9ARE6     | tr E9ARE6 E9ARE6_LEIMU | Putative alpha glucosidase II subunit OS=Leishmania   | 2  |
| 2.941212212 | -0.76556 | E9AQL0     | tr E9AQL0 E9AQL0_LEIMU | Uncharacterized protein OS=Leishmania mexicana (      | 4  |
| 3.079942665 | -0.7658  | E9ATK5     | tr E9ATK5 E9ATK5_LEIMU | Uncharacterized protein OS=Leishmania mexicana (s     | 8  |
| 3.318958302 | -0.7669  | E9AW71     | tr E9AW71 E9AW71_LEIMU | Kinesin-like protein OS=Leishmania mexicana (stra     | 7  |
| 2.832812522 | -0.76759 | E9ANV2     | tr E9ANV2 E9ANV2_LEIMU | Putative cysteinyl-tRNA synthetase OS=Leishmania      | 7  |
| 3.102746669 | -0.76779 | E9APJ0     | tr E9APJ0 E9APJ0_LEIMU | Putative chaperonin TCP20 OS=Leishmania mexicana      | 10 |
| 3.254527132 | -0.76894 | E9AWI0     | tr E9AWI0 E9AWI0_LEIMU | Pyridoxal phosphate homeostasis protein OS=Leish      | 7  |
| 3.057437971 | -0.77378 | E9B384     | tr E9B384 E9B384_LEIMU | Uncharacterized protein OS=Leishmania mexicana (s     | 15 |
| 2.460382837 | -0.77432 | Q9GRU2;E9  | tr Q9GRU2 Q9GRU2_LEIME | Mitogen-activated protein kinase OS=Leishmania r      | 3  |
| 2.760809845 | -0.77434 | E9ANC5     | tr E9ANC5 E9ANC5_LEIMU | Uncharacterized protein OS=Leishmania mexicana        | 4  |
| 3.163652653 | -0.77447 | E9B2C2     | tr E9B2C2 E9B2C2_LEIMU | Uncharacterized protein OS=Leishmania mexicana (s     | 13 |
| 3.227904514 | -0.77511 | E9AKE1;Q0C | tr E9AKE1 E9AKE1_LEIMU | Trypanothione reductase OS=Leishmania mexicana        | 7  |
| 3.625794962 | -0.77558 | E9AV44     | tr E9AV44 E9AV44_LEIMU | Proteasome regulatory non-ATP-ase subunit 5, putat    | 3  |
| 3.290933256 | -0.77782 | E9ANQ6     | tr E9ANQ6 E9ANQ6_LEIMU | Putative eukaryotic release factor 3 OS=Leishmani     | 7  |
| 3.451558202 | -0.77849 | E9B494     | tr E9B494 E9B494_LEIMU | Isocitrate dehydrogenase [NADP] OS=Leishmania m       | 4  |
| 2.95365532  | -0.78    | E9B078     | tr E9B078 E9B078_LEIMU | Putative 40S ribosomal protein S17 OS=Leishmania r    | 6  |
| 3.057792968 | -0.78447 | E9AQ51     | tr E9AQ51 E9AQ51_LEIMU | Uncharacterized protein OS=Leishmania mexicana        | 4  |
| 3.087215746 | -0.78455 | E9AY83     | tr E9AY83 E9AY83_LEIMU | Uncharacterized protein OS=Leishmania mexicana (s     | 5  |
| 2.550557858 | -0.78652 | E9AZ34     | tr E9AZ34 E9AZ34_LEIMU | Uncharacterized protein OS=Leishmania mexicana (s     | 2  |
| 3.136406286 | -0.78831 | E9B4L7     | tr E9B4L7 E9B4L7_LEIMU | Putative importin beta-1 subunit OS=Leishmania me     | 3  |
| 3.065862849 | -0.79199 | E9AZ49     | tr E9AZ49 E9AZ49_LEIMU | Uncharacterized protein OS=Leishmania mexicana (s     | 2  |
| 3.016364711 | -0.79258 | E9ALV8;A5J | tr E9ALV8 E9ALV8_LEIMU | Putative tryparedoxin OS=Leishmania mexicana (str     | 5  |
| 3.07236494  | -0.79324 | E9AVH4     | tr E9AVH4 E9AVH4_LEIMU | 40S ribosomal protein S6 OS=Leishmania mexicana       | 9  |
| 2.872624819 | -0.79496 | E9ARW5     | tr E9ARW5 E9ARW5_LEIMU | Uncharacterized protein OS=Leishmania mexicana        | 3  |
| 3.722846288 | -0.79655 | E9ARI8     | tr E9ARI8 E9ARI8_LEIMU | Aconitate hydratase OS=Leishmania mexicana (strain    | 19 |
| 2.751054266 | -0.7977  | E9B4J1     | tr E9B4J1 E9B4J1_LEIMU | Uncharacterized protein OS=Leishmania mexicana (st    | 5  |
| 2.883989012 | -0.79895 | E9B5Z0     | tr E9B5Z0 E9B5Z0_LEIMU | Uncharacterized protein OS=Leishmania mexicana (s     | 2  |
| 3.071828087 | -0.79911 | E9ASP5;E9A | tr E9ASP5 E9ASP5_LEIMU | Putative 40S ribosomal protein S9 OS=Leishmania m     | 6  |
| 3.171989961 | -0.80238 | E9AY41     | tr E9AY41 E9AY41_LEIMU | Putative 10 kDa heat shock protein OS=Leishmania r    | 4  |
| 3.255387805 | -0.80318 | E9AKW6     | tr E9AKW6 E9AKW6_LEIMU | Putative acyl-coenzyme a dehydrogenase OS=Leisl       | 3  |
| 3.187245219 | -0.80328 | E9AY45;A7Y | tr E9AY45 E9AY45_LEIMU | Uncharacterized protein OS=Leishmania mexicana (s     | 6  |
| 2.687600298 | -0.80476 | E9ALM8     | tr E9ALM8 E9ALM8_LEIMU | Putative fumarate hydratase (Fragment) OS=Leishr      | 2  |
| 2.919778112 | -0.8048  | E9APRO     | tr E9APRO E9APRO_LEIMU | Elongation of fatty acids protein OS=Leishmania me    | 3  |
| 3.04164485  | -0.80527 | E9AXX1     | tr E9AXX1 E9AXX1_LEIMU | Putative adenylate kinase OS=Leishmania mexicana      | 2  |
| 2.363387249 | -0.80562 | E9AWM1     | tr E9AWM1 E9AWM1_LEIMU | Putative fumarate hydratase OS=Leishmania me          | 12 |
| 3.863365268 | -0.80597 | E9AQS3     | tr E9AQS3 E9AQS3_LEIMU | Tyrosyl or methionyl-tRNA synthetase-like protein C   | 3  |
| 3.469857385 | -0.80712 | E9APD3     | tr E9APD3 E9APD3_LEIMU | Putative proteasome regulatory ATPase subunit 2 C     | 4  |
| 2.661633671 | -0.80926 | E9B6S6     | tr E9B6S6 E9B6S6_LEIMU | Uncharacterized protein OS=Leishmania mexicana (s     | 4  |
| 2.627943532 | -0.80996 | E9AQD9     | tr E9AQD9 E9AQD9_LEIMU | Putative glutaminyl-tRNA synthetase OS=Leishman       | 6  |



|             |          |               |                        |                                                       |    |
|-------------|----------|---------------|------------------------|-------------------------------------------------------|----|
| 2.982433365 | -0.8101  | E9B1S6;E9B tr | E9B1S6 E9B1S6_LEIMU    | Putative p-glycoprotein e OS=Leishmania mexicana (    | 2  |
| 2.864697431 | -0.81012 | E9B259        | tr E9B259 E9B259_LEIMU | Putative calreticulin OS=Leishmania mexicana (strain  | 2  |
| 3.463671036 | -0.81054 | E9B716        | tr E9B716 E9B716_LEIMU | Uncharacterized protein OS=Leishmania mexicana (s     | 3  |
| 3.749331231 | -0.81132 | E9ALE4        | tr E9ALE4 E9ALE4_LEIMU | Uncharacterized protein OS=Leishmania mexicana (s     | 3  |
| 3.417311568 | -0.81435 | E9AKP0        | tr E9AKP0 E9AKP0_LEIMU | Peptidyl-prolyl cis-trans isomerase OS=Leishmania n   | 3  |
| 3.223156582 | -0.81518 | E9AT73        | tr E9AT73 E9AT73_LEIMU | Succinate--CoA ligase [ADP-forming] subunit beta, r   | 10 |
| 3.049040398 | -0.81552 | E9B5P1;Q27 tr | E9B5P1 E9B5P1_LEIMU    | Pyruvate kinase OS=Leishmania mexicana (strain Mf     | 6  |
| 2.955630773 | -0.81575 | E9AS06        | tr E9AS06 E9AS06_LEIMU | Methionine aminopeptidase OS=Leishmania mexica        | 2  |
| 3.570970201 | -0.81625 | E9AJY1        | tr E9AJY1 E9AJY1_LEIMU | Uncharacterized protein OS=Leishmania mexicana (st    | 4  |
| 3.43613767  | -0.81641 | E9B378        | tr E9B378 E9B378_LEIMU | Tubulin-specific chaperone A OS=Leishmania mexica     | 2  |
| 2.858835589 | -0.81682 | E9B1R0        | tr E9B1R0 E9B1R0_LEIMU | Putative N-acyl-L-amino acid amidohydrolase OS=Le     | 2  |
| 2.41583887  | -0.81739 | E9B0K5        | tr E9B0K5 E9B0K5_LEIMU | Mitochondrial oligo_U binding protein TBRGG1,puta     | 2  |
| 3.343930006 | -0.82065 | E9AUZ2;E9A tr | E9AUZ2 E9AUZ2_LEIMU    | Phosphotransferase OS=Leishmania mexicana (strai      | 17 |
| 3.290684003 | -0.8218  | E9ALK3        | tr E9ALK3 E9ALK3_LEIMU | Putative GTP-binding protein OS=Leishmania mexica     | 13 |
| 2.217174701 | -0.82205 | E9ARD7;E9A tr | E9ARD7 E9ARD7_LEIMU    | Receptor-type adenylate cyclase a OS=Leishmania r     | 5  |
| 3.331668419 | -0.82297 | E9AVE1        | tr E9AVE1 E9AVE1_LEIMU | Putative RNA helicase OS=Leishmania mexicana (str     | 9  |
| 3.048548852 | -0.82525 | E9ANHO        | tr E9ANHO E9ANHO_LEIMU | Proteasome subunit alpha type OS=Leishmania me        | 2  |
| 4.131788758 | -0.826   | E9B4S6        | tr E9B4S6 E9B4S6_LEIMU | Putative uracil phosphoribosyltransferase OS=Leishn   | 3  |
| 3.273896884 | -0.82866 | E9B5Z9        | tr E9B5Z9 E9B5Z9_LEIMU | Putative pre-mRNA splicing factor ATP-dependent RI    | 2  |
| 3.083332162 | -0.8292  | E9B620        | tr E9B620 E9B620_LEIMU | Putative threonyl-tRNA synthetase OS=Leishmania n     | 6  |
| 3.673408034 | -0.82959 | E9AVB9        | tr E9AVB9 E9AVB9_LEIMU | V-type proton ATPase subunit H OS=Leishmania me       | 3  |
| 2.38762938  | -0.83189 | E9ARI3        | tr E9ARI3 E9ARI3_LEIMU | Putative tubulin-specific chaperone OS=Leishmania n   | 2  |
| 3.248275554 | -0.83733 | E9ALH7        | tr E9ALH7 E9ALH7_LEIMU | Putative 60S ribosomal protein L13 OS=Leishmania i    | 8  |
| 2.795395464 | -0.83733 | E9B0I8        | tr E9B0I8 E9B0I8_LEIMU | Putative histidyl-tRNA synthetase OS=Leishmania me    | 4  |
| 3.017856443 | -0.83966 | E9B6T5        | tr E9B6T5 E9B6T5_LEIMU | Uncharacterized protein OS=Leishmania mexicana (s     | 2  |
| 3.160364683 | -0.84388 | E9ALU9        | tr E9ALU9 E9ALU9_LEIMU | Uncharacterized protein OS=Leishmania mexicana (s     | 7  |
| 3.177107418 | -0.84412 | E9ARU2;Q6 tr  | E9ARU2 E9ARU2_LEIMU    | Nonspecific nucleoside hydrolase OS=Leishmania n      | 2  |
| 3.114915809 | -0.84692 | E9AUS9        | tr E9AUS9 E9AUS9_LEIMU | Putative axoneme central apparatus protein OS=Lei     | 8  |
| 2.791853704 | -0.84711 | E9B422        | tr E9B422 E9B422_LEIMU | Putative ABC transporter OS=Leishmania mexicana (     | 3  |
| 2.373935716 | -0.8479  | E9AVX8        | tr E9AVX8 E9AVX8_LEIMU | I/6 autoantigen-like protein OS=Leishmania mexica     | 5  |
| 4.242867557 | -0.84949 | E9B4A1        | tr E9B4A1 E9B4A1_LEIMU | Mitochondrial processing peptidase alpha subunit,p    | 2  |
| 3.592793146 | -0.85036 | E9AVE2        | tr E9AVE2 E9AVE2_LEIMU | Uncharacterized protein OS=Leishmania mexicana (s     | 7  |
| 2.778003583 | -0.85125 | E9ATM9        | tr E9ATM9 E9ATM9_LEIMU | Putative mitochondrial intermediate peptidase OS      | 6  |
| 3.035090015 | -0.85339 | E9AR04        | tr E9AR04 E9AR04_LEIMU | Uncharacterized protein OS=Leishmania mexicana (s     | 3  |
| 3.236433071 | -0.85434 | E9AJS7;E9A tr | E9AJS7 E9AJS7_LEIMU    | Putative 60S acidic ribosomal protein P2 OS=Leishma   | 6  |
| 3.33890329  | -0.85496 | E9ALV6        | tr E9ALV6 E9ALV6_LEIMU | Uncharacterized protein OS=Leishmania mexicana (s     | 3  |
| 3.057674631 | -0.85549 | E9B705        | tr E9B705 E9B705_LEIMU | Putative peptidyl-prolyl cis-trans isomerase (Cycloph | 4  |
| 3.421553961 | -0.85574 | E9B1W4;E9I tr | E9B1W4 E9B1W4_LEIMU    | Thiolase protein-like protein OS=Leishmania mexic     | 7  |
| 3.1028291   | -0.85777 | E9ARQ8;E9A tr | E9ARQ8 E9ARQ8_LEIMU    | Putative prolyl-tRNA synthetase OS=Leishmania me      | 7  |
| 2.95156582  | -0.8593  | E9B5S5        | tr E9B5S5 E9B5S5_LEIMU | Putative ATP-dependent DEAD-box RNA helicase OS:      | 9  |
| 3.143002737 | -0.86231 | E9ATM0        | tr E9ATM0 E9ATM0_LEIMU | Proteasome regulatory ATPase subunit OS=Leishm        | 3  |
| 3.691788674 | -0.86555 | E9B466        | tr E9B466 E9B466_LEIMU | Uncharacterized protein OS=Leishmania mexicana (s     | 3  |
| 2.679647354 | -0.86566 | E9AU12        | tr E9AU12 E9AU12_LEIMU | tRNA (adenine(58)-N(1))-methyltransferase non-cal     | 2  |
| 3.262070336 | -0.86578 | E9AW84        | tr E9AW84 E9AW84_LEIMU | 3-ketoacyl-CoA thiolase-like protein OS=Leishman      | 6  |
| 3.508953738 | -0.86723 | E9AK58        | tr E9AK58 E9AK58_LEIMU | Putative 60S ribosomal protein L10 OS=Leishmania i    | 5  |
| 3.028774689 | -0.86755 | E9AUC7        | tr E9AUC7 E9AUC7_LEIMU | Putative T-complex protein 1, theta subunit OS=Lei    | 7  |
| 3.043243807 | -0.86984 | E9AKJ5        | tr E9AKJ5 E9AKJ5_LEIMU | Uncharacterized protein OS=Leishmania mexicana (st    | 2  |
| 3.3024831   | -0.86986 | E9AW77        | tr E9AW77 E9AW77_LEIMU | Uncharacterized protein OS=Leishmania mexicana        | 2  |
| 3.806200723 | -0.86995 | E9AJN9        | tr E9AJN9 E9AJN9_LEIMU | D-3-phosphoglycerate dehydrogenase OS=Leishman        | 3  |
| 3.365083432 | -0.87152 | Q71PB4;E9E tr | Q71PB4 Q71PB4_LEIME    | Broad specificity aminotransferase (Fragment) OS=L    | 6  |
| 2.804657374 | -0.87257 | E9AK97        | tr E9AK97 E9AK97_LEIMU | Putative fructose-1,6-bisphosphatase, cytosolic OS=   | 2  |
| 3.51275574  | -0.87313 | E9AQ99;E9E tr | E9AQ99 E9AQ99_LEIMU    | 60S ribosomal protein L6 OS=Leishmania mexicana       | 4  |
| 2.823431743 | -0.87542 | E9AQS9        | tr E9AQS9 E9AQS9_LEIMU | Coatomer subunit delta OS=Leishmania mexicana (s      | 5  |
| 3.493887141 | -0.87582 | E9AXL3        | tr E9AXL3 E9AXL3_LEIMU | Uncharacterized protein OS=Leishmania mexicana (s     | 2  |
| 2.730072383 | -0.87855 | E9B0G6        | tr E9B0G6 E9B0G6_LEIMU | WD-40 repeat protein OS=Leishmania mexicana (str      | 2  |
| 3.373373457 | -0.88037 | E9ARI2        | tr E9ARI2 E9ARI2_LEIMU | Carboxypeptidase OS=Leishmania mexicana (strain M     | 2  |
| 3.238225828 | -0.88472 | E9B0D7        | tr E9B0D7 E9B0D7_LEIMU | Alkyl dihydroxyacetonephosphate synthase OS=Leis      | 4  |
| 3.349846025 | -0.88544 | E9B1B3        | tr E9B1B3 E9B1B3_LEIMU | Phosphoglycerate kinase OS=Leishmania mexicana (      | 4  |
| 2.134170981 | -0.88597 | E9AWD4        | tr E9AWD4 E9AWD4_LEIMU | Putative coronin OS=Leishmania mexicana (strain       | 2  |
| 3.424356292 | -0.88944 | E9B2N1        | tr E9B2N1 E9B2N1_LEIMU | Putative dynein OS=Leishmania mexicana (strain M      | 6  |
| 3.190282269 | -0.89035 | E9AVA9        | tr E9AVA9 E9AVA9_LEIMU | Putative adenylate kinase OS=Leishmania mexicana      | 4  |
| 2.370287399 | -0.89198 | E9B2P1        | tr E9B2P1 E9B2P1_LEIMU | Elongation of fatty acids protein OS=Leishmania me    | 2  |
| 3.018035205 | -0.89229 | E9AP13        | tr E9AP13 E9AP13_LEIMU | NADH:flavin oxidoreductase/NADH oxidase,putative      | 7  |

|             |          |            |                        |                                                       |    |
|-------------|----------|------------|------------------------|-------------------------------------------------------|----|
| 2.590595778 | -0.89323 | Q86PL7;E9A | tr Q86PL7 Q86PL7_LEIME | Putative small GTP-binding protein OS=Leishmania n    | 4  |
| 3.304611872 | -0.89528 | Q95NJ3;E8N | tr Q95NJ3 Q95NJ3_LEIAM | Activated C kinase protein OS=Leishmania amazone      | 11 |
| 2.849892963 | -0.89707 | E9ALD1     | tr E9ALD1 E9ALD1_LEIMU | Proteasome regulatory non-ATP-ase subunit,putativ     | 2  |
| 2.72868711  | -0.89857 | E9ATU8     | tr E9ATU8 E9ATU8_LEIMU | Uncharacterized protein OS=Leishmania mexicana (      | 2  |
| 3.338298294 | -0.89862 | E9ARF2     | tr E9ARF2 E9ARF2_LEIMU | Serine/threonine protein phosphatase type 5,putati    | 3  |
| 3.751666817 | -0.90047 | E8NH10     | tr E8NH10 E8NH10_LEIMU | 40S ribosomal protein S3a OS=Leishmania mexicana      | 9  |
| 3.504812424 | -0.90197 | E9AZV4     | tr E9AZV4 E9AZV4_LEIMU | Haloacid dehalogenase-like hydrolase-like protein O   | 2  |
| 3.548165627 | -0.9027  | E9AV93     | tr E9AV93 E9AV93_LEIMU | T-complex protein 1 subunit delta OS=Leishmania rr    | 14 |
| 3.968011574 | -0.90367 | V5RIA5;E9A | tr V5RIA5 V5RIA5_LEIAM | Calmodulin-like protein OS=Leishmania amazonensis     | 8  |
| 3.042399584 | -0.90446 | E9B3G5     | tr E9B3G5 E9B3G5_LEIMU | Putative myosin heavy chain OS=Leishmania mexica      | 6  |
| 3.268641779 | -0.90524 | E9ARW6     | tr E9ARW6 E9ARW6_LEIMU | Uncharacterized protein OS=Leishmania mexicana        | 3  |
| 3.529329671 | -0.90532 | E9AQL8;Q9F | tr E9AQL8 E9AQL8_LEIMU | Putative carbamoyl-phosphate synthase OS=Leishm       | 26 |
| 2.941353717 | -0.90589 | E9B4H4;Q8I | tr E9B4H4 E9B4H4_LEIMU | Glucose-6-phosphate 1-dehydrogenase OS=Leishma        | 3  |
| 3.719224335 | -0.90632 | E9APR4;E9A | tr E9APR4 E9APR4_LEIMU | Elongation of fatty acids protein OS=Leishmania me    | 2  |
| 4.135814176 | -0.91119 | E9AM00     | tr E9AM00 E9AM00_LEIMU | Putative U-box domain protein OS=Leishmania me        | 3  |
| 3.09657941  | -0.91192 | E9AU74     | tr E9AU74 E9AU74_LEIMU | Uncharacterized protein OS=Leishmania mexicana (      | 2  |
| 3.364003224 | -0.91225 | E9B1F7     | tr E9B1F7 E9B1F7_LEIMU | Uncharacterized protein OS=Leishmania mexicana (s     | 4  |
| 2.750587284 | -0.91368 | E9AT17     | tr E9AT17 E9AT17_LEIMU | Uncharacterized protein OS=Leishmania mexicana (st    | 6  |
| 2.939300053 | -0.9147  | E9AJN3     | tr E9AJN3 E9AJN3_LEIMU | Putative ATP-dependent Clp protease subunit, heat :   | 5  |
| 3.691795838 | -0.91517 | E9AZ73     | tr E9AZ73 E9AZ73_LEIMU | Putative eukaryotic translation release factor OS=Lei | 10 |
| 2.901030849 | -0.91562 | E9B584     | tr E9B584 E9B584_LEIMU | Uncharacterized protein OS=Leishmania mexicana (s     | 3  |
| 4.151347632 | -0.92194 | E9ATN5;E9A | tr E9ATN5 E9ATN5_LEIMU | Putative 60S ribosomal protein L18 OS=Leishmania      | 3  |
| 3.05079118  | -0.92199 | E9AWH3     | tr E9AWH3 E9AWH3_LEIMU | Uncharacterized protein OS=Leishmania mexicana        | 2  |
| 3.702740494 | -0.92325 | E9ANB8     | tr E9ANB8 E9ANB8_LEIMU | Uncharacterized protein OS=Leishmania mexicana        | 5  |
| 2.989584698 | -0.92399 | E9ATU0     | tr E9ATU0 E9ATU0_LEIMU | Uncharacterized protein OS=Leishmania mexicana (      | 2  |
| 3.60141388  | -0.92434 | E9AZR7     | tr E9AZR7 E9AZR7_LEIMU | Putative ribosomal protein S20 OS=Leishmania mexi     | 3  |
| 2.857571628 | -0.92472 | E9AQX3     | tr E9AQX3 E9AQX3_LEIMU | Uncharacterized protein OS=Leishmania mexicana        | 4  |
| 2.961644049 | -0.92571 | E9AJN6     | tr E9AJN6 E9AJN6_LEIMU | Putative peptidyl dipeptidase OS=Leishmania mexica    | 4  |
| 3.210250697 | -0.92601 | E9AJQ8     | tr E9AJQ8 E9AJQ8_LEIMU | Putative long chain fatty Acyl CoA synthetase OS=Le   | 3  |
| 3.544067558 | -0.92707 | E9AUB1     | tr E9AUB1 E9AUB1_LEIMU | Uncharacterized protein OS=Leishmania mexicana        | 7  |
| 3.268216352 | -0.92773 | E9AJV2     | tr E9AJV2 E9AJV2_LEIMU | Uncharacterized protein OS=Leishmania mexicana (s     | 12 |
| 3.121840783 | -0.92821 | E9AMD5     | tr E9AMD5 E9AMD5_LEIMU | Translation initiation factor-like protein OS=Leishr  | 3  |
| 3.451974193 | -0.92831 | E9AWK3     | tr E9AWK3 E9AWK3_LEIMU | Ankyrin/TPR repeat protein OS=Leishmania mexica       | 4  |
| 3.403088258 | -0.92997 | E9AQ24     | tr E9AQ24 E9AQ24_LEIMU | Lysine--tRNA ligase OS=Leishmania mexicana (strai     | 9  |
| 3.345778068 | -0.93419 | E9ATN0     | tr E9ATN0 E9ATN0_LEIMU | Uncharacterized protein OS=Leishmania mexicana (      | 3  |
| 3.557186738 | -0.93437 | E9APU4     | tr E9APU4 E9APU4_LEIMU | ADP/ATP mitochondrial carrier-like protein OS=Leis    | 3  |
| 3.619157585 | -0.93489 | E9B2Z5     | tr E9B2Z5 E9B2Z5_LEIMU | Uncharacterized protein OS=Leishmania mexicana (s     | 9  |
| 3.511043581 | -0.93494 | E9B3B4     | tr E9B3B4 E9B3B4_LEIMU | Dihydrolipoyl dehydrogenase OS=Leishmania mexica      | 11 |
| 3.076540455 | -0.93641 | E9ATV9     | tr E9ATV9 E9ATV9_LEIMU | Uncharacterized protein OS=Leishmania mexicana (:     | 2  |
| 2.8225642   | -0.93783 | E9B694     | tr E9B694 E9B694_LEIMU | Uncharacterized protein OS=Leishmania mexicana (s     | 4  |
| 3.160404726 | -0.9416  | E9B2L9     | tr E9B2L9 E9B2L9_LEIMU | Uncharacterized protein OS=Leishmania mexicana (s     | 10 |
| 3.471285753 | -0.94263 | E9B0V2     | tr E9B0V2 E9B0V2_LEIMU | Putative queuine tRNA-ribosyltransferase OS=Leishr    | 3  |
| 3.077134579 | -0.94395 | E9AXG0     | tr E9AXG0 E9AXG0_LEIMU | Prefoldin subunit 4 OS=Leishmania mexicana (strai     | 3  |
| 3.166927342 | -0.9443  | E9AJD6     | tr E9AJD6 E9AJD6_LEIMU | Putative long-chain-fatty-acid-CoA ligase OS=Leishm   | 4  |
| 2.926331248 | -0.94908 | E9ASZ2     | tr E9ASZ2 E9ASZ2_LEIMU | Putative COP-coated vesicle membrane protein erv2     | 2  |
| 3.273045502 | -0.95039 | E9AYF0     | tr E9AYF0 E9AYF0_LEIMU | Putative cytochrome c oxidase subunit V OS=Leishm     | 3  |
| 2.847204698 | -0.95232 | E9AJY0     | tr E9AJY0 E9AJY0_LEIMU | Uncharacterized protein OS=Leishmania mexicana (st    | 2  |
| 3.413591976 | -0.95234 | E9AXJ6;E9A | tr E9AXJ6 E9AXJ6_LEIMU | ATP synthase subunit beta OS=Leishmania mexicana      | 21 |
| 3.29516347  | -0.95393 | E9B1W8     | tr E9B1W8 E9B1W8_LEIMU | Uncharacterized protein OS=Leishmania mexicana        | 2  |
| 3.538406898 | -0.95417 | E9AX01     | tr E9AX01 E9AX01_LEIMU | Uncharacterized protein OS=Leishmania mexicana (:     | 9  |
| 3.187864878 | -0.95439 | E9ATU7     | tr E9ATU7 E9ATU7_LEIMU | Uncharacterized protein OS=Leishmania mexicana (      | 4  |
| 3.454239765 | -0.95448 | E9AST4     | tr E9AST4 E9AST4_LEIMU | Clathrin heavy chain OS=Leishmania mexicana (strai    | 29 |
| 3.965116735 | -0.95719 | E9AP55     | tr E9AP55 E9AP55_LEIMU | Uncharacterized protein OS=Leishmania mexicana (s     | 3  |
| 3.592093868 | -0.95773 | E9AT13     | tr E9AT13 E9AT13_LEIMU | Putative tyrosine aminotransferase OS=Leishmania r    | 9  |
| 3.453420337 | -0.9579  | E9AT36     | tr E9AT36 E9AT36_LEIMU | Putative membrane-bound acid phosphatase 2 OS=l       | 7  |
| 3.34726664  | -0.958   | E9B2A8     | tr E9B2A8 E9B2A8_LEIMU | Putative peptidase OS=Leishmania mexicana (strain     | 5  |
| 3.385323236 | -0.95838 | E9ALK7     | tr E9ALK7 E9ALK7_LEIMU | Rab GDP dissociation inhibitor OS=Leishmania mexic    | 4  |
| 3.919303703 | -0.95945 | E9AXM1     | tr E9AXM1 E9AXM1_LEIMU | GTP-binding nuclear protein OS=Leishmania mexic       | 6  |
| 3.203802945 | -0.96051 | E9B073     | tr E9B073 E9B073_LEIMU | Putative acyl-CoA dehydrogenase OS=Leishmania m       | 7  |
| 4.011858442 | -0.96152 | E9B1H5     | tr E9B1H5 E9B1H5_LEIMU | Putative ATP-dependent RNA helicase OS=Leishmar       | 4  |
| 3.400888201 | -0.96328 | E9B544     | tr E9B544 E9B544_LEIMU | Uncharacterized protein OS=Leishmania mexicana (s     | 3  |
| 3.021561046 | -0.96685 | E9ASF3     | tr E9ASF3 E9ASF3_LEIMU | ER membrane protein complex subunit 3 OS=Leishm       | 2  |
| 3.572358112 | -0.9669  | Q8MTW1;E1  | tr Q8MTW1 Q8MTW1_LEIAM | Meta 2 protein OS=Leishmania amazonensis OX:          | 3  |

|             |          |            |                                                                             |    |
|-------------|----------|------------|-----------------------------------------------------------------------------|----|
| 3.577778811 | -0.96829 | E9B146     | tr E9B146 E9B146_LEIMU Conserved TPR domain protein OS=Leishmania mexi      | 8  |
| 3.572405083 | -0.96881 | E9B473     | tr E9B473 E9B473_LEIMU Succinyl-CoA:3-ketoacid-coenzyme A transferase OS    | 5  |
| 3.457233998 | -0.96973 | E9AU22     | tr E9AU22 E9AU22_LEIMU Uncharacterized protein OS=Leishmania mexicana (     | 6  |
| 3.979712284 | -0.96975 | E9ALU2     | tr E9ALU2 E9ALU2_LEIMU Putative carnitine/choline acetyltransferase OS=Leis | 7  |
| 2.795584929 | -0.97198 | E9ALJ9     | tr E9ALJ9 E9ALJ9_LEIMU Aminopeptidase OS=Leishmania mexicana (strain MH     | 4  |
| 3.63666725  | -0.97209 | E9ARA1     | tr E9ARA1 E9ARA1_LEIMU Putative translation initiation factor OS=Leishmania | 8  |
| 3.535782139 | -0.97519 | E9B183     | tr E9B183 E9B183_LEIMU Uncharacterized protein OS=Leishmania mexicana (s    | 9  |
| 3.168053071 | -0.97542 | E9B011     | tr E9B011 E9B011_LEIMU Uncharacterized protein OS=Leishmania mexicana (st   | 3  |
| 3.955560257 | -0.97903 | E9AYK8     | tr E9AYK8 E9AYK8_LEIMU Putative nitrilase OS=Leishmania mexicana (strain M  | 2  |
| 3.487427008 | -0.98274 | E9B6N5     | tr E9B6N5 E9B6N5_LEIMU Uncharacterized protein OS=Leishmania mexicana (     | 3  |
| 3.232207588 | -0.98326 | E9AXK0     | tr E9AXK0 E9AXK0_LEIMU Uncharacterized protein OS=Leishmania mexicana (:    | 3  |
| 3.785060118 | -0.98665 | E9AVG6     | tr E9AVG6 E9AVG6_LEIMU Proteasome subunit alpha type OS=Leishmania me:      | 4  |
| 3.464590906 | -0.9889  | E9AYB7     | tr E9AYB7 E9AYB7_LEIMU Prefoldin subunit 3 OS=Leishmania mexicana (strain   | 2  |
| 3.39171761  | -0.99264 | E9AMV6     | tr E9AMV6 E9AMV6_LEIMU Phospholipid:diacylglycerol acyltransferase,putati   | 5  |
| 2.818002818 | -0.99369 | E9AK40;A0A | tr E9AK40 E9AK40_LEIMU Putative spermidine synthase OS=Leishmania mexic     | 2  |
| 3.958564008 | -0.99569 | E9AZX3     | tr E9AZX3 E9AZX3_LEIMU Putative DEAD box RNA helicase OS=Leishmania me:     | 2  |
| 3.009776356 | -0.99581 | E9B276     | tr E9B276 E9B276_LEIMU Uncharacterized protein OS=Leishmania mexicana (s    | 3  |
| 3.183974789 | -0.9963  | E9ANC1     | tr E9ANC1 E9ANC1_LEIMU Uncharacterized protein OS=Leishmania mexicana (     | 5  |
| 3.727862067 | -0.99701 | E9AQ01     | tr E9AQ01 E9AQ01_LEIMU Uncharacterized protein OS=Leishmania mexicana (     | 3  |
| 3.549176547 | -0.99757 | E9B476     | tr E9B476 E9B476_LEIMU Uncharacterized protein OS=Leishmania mexicana (s    | 4  |
| 2.937258144 | -1.00051 | E9AYM2     | tr E9AYM2 E9AYM2_LEIMU Uncharacterized protein OS=Leishmania mexicana       | 2  |
| 3.61774826  | -1.00253 | E9B187     | tr E9B187 E9B187_LEIMU Putative valyl-tRNA synthetase OS=Leishmania mexi    | 3  |
| 3.750685071 | -1.00434 | E9B5F8     | tr E9B5F8 E9B5F8_LEIMU Vacuolar ATP synthase catalytic subunit A,putative C | 13 |
| 3.529083694 | -1.00714 | E9B5Z7;E9B | tr E9B5Z7 E9B5Z7_LEIMU Putative NADH-dependent fumarate reductase OS=L      | 15 |
| 3.491633534 | -1.00831 | E9ASL3     | tr E9ASL3 E9ASL3_LEIMU Putative 40S ribosomal protein S18 OS=Leishmania n   | 8  |
| 3.563270617 | -1.01079 | E9AK51     | tr E9AK51 E9AK51_LEIMU Putative ubiquitin-conjugating enzyme e2 OS=Leishr   | 2  |
| 2.727808636 | -1.01241 | E9ASG7     | tr E9ASG7 E9ASG7_LEIMU Putative DNAJ domain protein OS=Leishmania mexi      | 2  |
| 3.855207768 | -1.01403 | E9AU41     | tr E9AU41 E9AU41_LEIMU Uncharacterized protein OS=Leishmania mexicana (     | 9  |
| 3.481139026 | -1.01927 | E9ATX3     | tr E9ATX3 E9ATX3_LEIMU Putative NADH dehydrogenase OS=Leishmania mexi       | 5  |
| 3.363973293 | -1.01999 | E9AUU5     | tr E9AUU5 E9AUU5_LEIMU Phosphatase-like protein OS=Leishmania mexicana      | 6  |
| 3.4388485   | -1.02676 | E9AW79     | tr E9AW79 E9AW79_LEIMU Uncharacterized protein OS=Leishmania mexicana       | 2  |
| 2.013182595 | -1.02797 | E9AZU7     | tr E9AZU7 E9AZU7_LEIMU Putative phenylalanine-4-hydroxylase OS=Leishman     | 2  |
| 4.18611656  | -1.02845 | E9AWN2     | tr E9AWN2 E9AWN2_LEIMU Ubiquitin carboxyl-terminal hydrolase OS=Leishm      | 2  |
| 3.87040637  | -1.02847 | E9ANM6     | tr E9ANM6 E9ANM6_LEIMU Uncharacterized protein OS=Leishmania mexicana;      | 8  |
| 3.496917442 | -1.03    | E9ANB6     | tr E9ANB6 E9ANB6_LEIMU Uncharacterized protein OS=Leishmania mexicana (     | 2  |
| 3.914680574 | -1.03019 | E9ALZ2     | tr E9ALZ2 E9ALZ2_LEIMU High mobility group protein homolog tdp-1,putative   | 3  |
| 3.015402825 | -1.03284 | E9AP30     | tr E9AP30 E9AP30_LEIMU Uncharacterized protein OS=Leishmania mexicana (:    | 2  |
| 3.101708531 | -1.03427 | E9ASS2     | tr E9ASS2 E9ASS2_LEIMU Uncharacterized protein OS=Leishmania mexicana (s    | 4  |
| 3.890786407 | -1.03493 | E9B189     | tr E9B189 E9B189_LEIMU Uncharacterized protein OS=Leishmania mexicana (s    | 3  |
| 3.932815306 | -1.03519 | E9AW40     | tr E9AW40 E9AW40_LEIMU Putative NADP-dependent alcohol dehydrogenase        | 8  |
| 4.143957865 | -1.03521 | E9ARM0     | tr E9ARM0 E9ARM0_LEIMU Periodic tryptophan protein 2-like protein OS=Leis   | 2  |
| 3.571408576 | -1.03568 | E9AXQ3     | tr E9AXQ3 E9AXQ3_LEIMU Pyruvate dehydrogenase E1 component subunit be       | 8  |
| 3.655471109 | -1.0362  | E9AQ06     | tr E9AQ06 E9AQ06_LEIMU Heat shock protein HslVU, ATPase subunit HslU,put    | 3  |
| 3.690253787 | -1.03817 | E9B3G8     | tr E9B3G8 E9B3G8_LEIMU Putative 60S ribosomal protein L2 OS=Leishmania r    | 5  |
| 3.892677191 | -1.04042 | E9ARJ0     | tr E9ARJ0 E9ARJ0_LEIMU Uncharacterized protein OS=Leishmania mexicana (s    | 2  |
| 3.138641212 | -1.04056 | E9AMD0     | tr E9AMD0 E9AMD0_LEIMU Putative ribose-phosphate pyrophosphokinase OS       | 2  |
| 3.603440154 | -1.04163 | E9AKL7     | tr E9AKL7 E9AKL7_LEIMU Uncharacterized protein OS=Leishmania mexicana (s    | 2  |
| 4.201873927 | -1.04179 | E9B1E9     | tr E9B1E9 E9B1E9_LEIMU Putative 5-methyltetrahydropteroyltriglutamate--ho   | 4  |
| 3.742907919 | -1.04238 | E9ASW8;Q8  | tr E9ASW8 E9ASW8_LEIMU Putative nucleoside transporter 1 OS=Leishmania r    | 2  |
| 3.461430488 | -1.04306 | E9ARX5     | tr E9ARX5 E9ARX5_LEIMU Uncharacterized protein OS=Leishmania mexicana (:    | 4  |
| 3.706949092 | -1.04384 | E9AZ37     | tr E9AZ37 E9AZ37_LEIMU Putative arginyl-tRNA synthetase OS=Leishmania me    | 19 |
| 3.390432137 | -1.04451 | E9B755     | tr E9B755 E9B755_LEIMU p21 antigen protein OS=Leishmania mexicana (strair   | 2  |
| 4.052930283 | -1.04694 | E9AZA7;E9A | tr E9AZA7 E9AZA7_LEIMU Branched-chain-amino-acid aminotransferase OS=L      | 6  |
| 3.51931464  | -1.04849 | E9B350;E9B | tr E9B350 E9B350_LEIMU Putative ribosomal protein L27 OS=Leishmania mexi    | 6  |
| 3.277159157 | -1.0494  | E9AWR7     | tr E9AWR7 E9AWR7_LEIMU Malic enzyme OS=Leishmania mexicana (strain Mf       | 7  |
| 3.402191843 | -1.05012 | E9AJJ4     | tr E9AJJ4 E9AJJ4_LEIMU Uncharacterized protein OS=Leishmania mexicana (str  | 7  |
| 3.327501188 | -1.05104 | E9AK26     | tr E9AK26 E9AK26_LEIMU Putative calpain-like cysteine peptidase OS=Leishma  | 2  |
| 3.705696213 | -1.05113 | E9ARL9     | tr E9ARL9 E9ARL9_LEIMU Uncharacterized protein OS=Leishmania mexicana (s    | 22 |
| 3.461294225 | -1.05155 | E9AQ39     | tr E9AQ39 E9AQ39_LEIMU Putative 60S acidic ribosomal protein OS=Leishman    | 2  |
| 3.982410778 | -1.05263 | E9AJV8     | tr E9AJV8 E9AJV8_LEIMU Uncharacterized protein OS=Leishmania mexicana (s    | 2  |
| 4.384735163 | -1.05365 | E9AYS6     | tr E9AYS6 E9AYS6_LEIMU Kinetoplast-associated protein-like protein OS=Leish | 3  |
| 3.796174915 | -1.05444 | E9AU26     | tr E9AU26 E9AU26_LEIMU Uncharacterized protein OS=Leishmania mexicana (     | 3  |
| 3.628965545 | -1.0568  | E9AVZ3     | tr E9AVZ3 E9AVZ3_LEIMU Uncharacterized protein OS=Leishmania mexicana (:    | 2  |



|                    |                 |                   |                               |                                                          |          |
|--------------------|-----------------|-------------------|-------------------------------|----------------------------------------------------------|----------|
| 3.303230999        | -1.05752        | E9B0P1            | tr E9B0P1 E9B0P1_LEIMU        | Importin subunit alpha OS=Leishmania mexicana (st        | 7        |
| 3.342026203        | -1.06015        | E9AV30            | tr E9AV30 E9AV30_LEIMU        | Putative phosphoglucomutase OS=Leishmania mexi           | 2        |
| 3.499892442        | -1.06367        | E9B687            | tr E9B687 E9B687_LEIMU        | Putative kinesin OS=Leishmania mexicana (strain Mf       | 6        |
| 3.10507818         | -1.06414        | E9ANI1            | tr E9ANI1 E9ANI1_LEIMU        | Putative 14-3-3 protein OS=Leishmania mexicana (st       | 6        |
| 2.98123483         | -1.06551        | E9B2X2            | tr E9B2X2 E9B2X2_LEIMU        | Putative heat shock protein-like protein OS=Leishma      | 2        |
| <b>3.456495441</b> | <b>-1.06699</b> | <b>E9ATF7</b>     | <b>tr E9ATF7 E9ATF7_LEIMU</b> | <b>Putative 40S ribosomal protein S27-1 OS=Leishmani</b> | <b>4</b> |
| 3.715439841        | -1.0676         | E9AMH0            | tr E9AMH0 E9AMH0_LEIMU        | Uncharacterized protein OS=Leishmania mexicana           | 3        |
| 3.61877565         | -1.06772        | E9ARK4            | tr E9ARK4 E9ARK4_LEIMU        | Uncharacterized protein OS=Leishmania mexicana (         | 6        |
| 3.49113934         | -1.07014        | E9AZE0            | tr E9AZE0 E9AZE0_LEIMU        | Obg-like ATPase 1 OS=Leishmania mexicana (strain M       | 4        |
| 3.386719267        | -1.07354        | E9APD4;A0         | tr E9APD4 E9APD4_LEIMU        | Putative leucyl-tRNA synthetase OS=Leishmania me         | 5        |
| 2.964556971        | -1.07421        | E9AZK7            | tr E9AZK7 E9AZK7_LEIMU        | Uncharacterized protein OS=Leishmania mexicana (s        | 2        |
| 3.247146437        | -1.07494        | E9B343            | tr E9B343 E9B343_LEIMU        | Putative cystathionine beta-lyase OS=Leishmania me       | 3        |
| 3.542392183        | -1.07897        | E9AT02;A0         | tr E9AT02 E9AT02_LEIMU        | Developmentally regulated GTP-binding protein 1,pu       | 7        |
| 4.868940803        | -1.08055        | E9ATC6            | tr E9ATC6 E9ATC6_LEIMU        | 2-oxoglutarate dehydrogenase E1 component,putat          | 6        |
| 3.830595979        | -1.08195        | E9ALX2            | tr E9ALX2 E9ALX2_LEIMU        | Uncharacterized protein OS=Leishmania mexicana (s        | 5        |
| 4.06702801         | -1.0851         | E9AV48            | tr E9AV48 E9AV48_LEIMU        | Uncharacterized protein OS=Leishmania mexicana (         | 15       |
| 3.20399899         | -1.08727        | E9AM02            | tr E9AM02 E9AM02_LEIMU        | Putative lipophosphoglycan biosynthetic protein C        | 9        |
| 4.056949533        | -1.08821        | E9AWI3            | tr E9AWI3 E9AWI3_LEIMU        | V-type proton ATPase subunit a OS=Leishmania me          | 3        |
| 4.071449505        | -1.08968        | E9AWB4            | tr E9AWB4 E9AWB4_LEIMU        | Uncharacterized protein OS=Leishmania mexicana           | 5        |
| 3.122671232        | -1.09053        | E9ASF4            | tr E9ASF4 E9ASF4_LEIMU        | Phosphatidylinositol-4-phosphate 5-kinase-like prote     | 2        |
| 3.289585207        | -1.09832        | E9AQW6            | tr E9AQW6 E9AQW6_LEIMU        | Putative endoplasmic reticulum oxidoreductin OS          | 2        |
| 3.664257185        | -1.10455        | E9APW3;Q3         | tr E9APW3 E9APW3_LEIMU        | Enolase OS=Leishmania mexicana (strain MHOM/C            | 17       |
| 3.386335124        | -1.1049         | E9AXC0            | tr E9AXC0 E9AXC0_LEIMU        | Uncharacterized protein OS=Leishmania mexicana (         | 5        |
| 3.801480869        | -1.10685        | E9AUL9            | tr E9AUL9 E9AUL9_LEIMU        | Putative vesicle-fusing ATPase OS=Leishmania mexi        | 6        |
| 3.40470862         | -1.10714        | E9AJD9            | tr E9AJD9 E9AJD9_LEIMU        | Putative long-chain-fatty-acid-CoA ligase OS=Leishm      | 6        |
| 3.779276353        | -1.1076         | E9AVY6            | tr E9AVY6 E9AVY6_LEIMU        | Alanine--tRNA ligase OS=Leishmania mexicana (strai       | 13       |
| <b>3.713769714</b> | <b>-1.10798</b> | <b>E9B713</b>     | <b>tr E9B713 E9B713_LEIMU</b> | <b>Proteasome subunit alpha type OS=Leishmania mex</b>   | <b>5</b> |
| 4.107362501        | -1.10877        | E9APZ6            | tr E9APZ6 E9APZ6_LEIMU        | Putative glutathione-S-transferase/glutaredoxin OS=      | 4        |
| 3.799023904        | -1.11051        | E9B297            | tr E9B297 E9B297_LEIMU        | Putative acetyl-CoA carboxylase OS=Leishmania me         | 27       |
| 3.525441875        | -1.11197        | E9AT43            | tr E9AT43 E9AT43_LEIMU        | Dihydrolipoamide acetyltransferase component of p        | 9        |
| 3.182108133        | -1.1142         | E9ALX8            | tr E9ALX8 E9ALX8_LEIMU        | Uncharacterized protein OS=Leishmania mexicana (s        | 2        |
| 3.609555068        | -1.11607        | E9APH2            | tr E9APH2 E9APH2_LEIMU        | Putative Ran-binding protein 1 OS=Leishmania mex         | 2        |
| 3.564625425        | -1.11718        | E9AWE0            | tr E9AWE0 E9AWE0_LEIMU        | T-complex protein 1 subunit gamma OS=Leishman            | 14       |
| 4.259858866        | -1.11923        | E9AM16            | tr E9AM16 E9AM16_LEIMU        | Putative ABC transporter OS=Leishmania mexicana          | 6        |
| <b>3.554326064</b> | <b>-1.11983</b> | <b>E9B578;E9B</b> | <b>tr E9B578 E9B578_LEIMU</b> | <b>Putative ribosomal protein L3 OS=Leishmania mexic</b> | <b>9</b> |
| 4.1573128          | -1.12368        | E9B4H8            | tr E9B4H8 E9B4H8_LEIMU        | Putative adenylate kinase OS=Leishmania mexicana         | 4        |
| 3.508131685        | -1.13183        | Q25319;E9         | tr Q25319 Q25319_LEIME        | Cathepsin B-like enzyme OS=Leishmania mexicana C         | 3        |
| 3.331893641        | -1.13519        | E9B215            | tr E9B215 E9B215_LEIMU        | Prostaglandin f2-alpha synthase OS=Leishmania me         | 6        |
| 3.606521756        | -1.13569        | E9B1X5            | tr E9B1X5 E9B1X5_LEIMU        | Nucleosome assembly protein-like protein OS=Leish        | 6        |
| 2.935362956        | -1.13633        | E9B733            | tr E9B733 E9B733_LEIMU        | Uncharacterized protein OS=Leishmania mexicana (s        | 2        |
| 3.994409109        | -1.1365         | E9AXP2            | tr E9AXP2 E9AXP2_LEIMU        | Uncharacterized protein OS=Leishmania mexicana (         | 5        |
| 3.04770704         | -1.13707        | E9AS55            | tr E9AS55 E9AS55_LEIMU        | Putative phenylalanyl-tRNA synthetase OS=Leishmar        | 2        |
| 3.628401677        | -1.13804        | E9AN99            | tr E9AN99 E9AN99_LEIMU        | Peptidylprolyl isomerase OS=Leishmania mexicana          | 2        |
| 2.217274808        | -1.14029        | E9AK63            | tr E9AK63 E9AK63_LEIMU        | Uncharacterized protein OS=Leishmania mexicana (         | 2        |
| 3.708145963        | -1.14065        | E9B6R4            | tr E9B6R4 E9B6R4_LEIMU        | T-complex protein 1 subunit eta OS=Leishmania me         | 11       |
| 3.21767906         | -1.14197        | E9AN31            | tr E9AN31 E9AN31_LEIMU        | Uncharacterized protein OS=Leishmania mexicana (         | 2        |
| 3.36716128         | -1.14251        | E9AZS3            | tr E9AZS3 E9AZS3_LEIMU        | Uncharacterized protein OS=Leishmania mexicana (s        | 4        |
| 3.679857192        | -1.14478        | E9B400            | tr E9B400 E9B400_LEIMU        | Peptidyl-prolyl cis-trans isomerase OS=Leishmania r      | 4        |
| <b>2.997514723</b> | <b>-1.14591</b> | <b>E9B6Q7</b>     | <b>tr E9B6Q7 E9B6Q7_LEIMU</b> | <b>Putative 60S ribosomal protein L23 OS=Leishmania</b>  | <b>4</b> |
| 3.49579952         | -1.14619        | E9AVS5;E9A        | tr E9AVS5 E9AVS5_LEIMU        | Uncharacterized protein OS=Leishmania mexicana (         | 2        |
| 3.527929595        | -1.14835        | E9APT8            | tr E9APT8 E9APT8_LEIMU        | Putative immunodominant antigen (Tc40 antigen-lik        | 7        |
| 3.876715408        | -1.15018        | E9ANP7            | tr E9ANP7 E9ANP7_LEIMU        | Uncharacterized protein OS=Leishmania mexicana (         | 6        |
| 4.112692685        | -1.15486        | O76285;E9A        | tr O76285 O76285_LEIAM        | Ribonucleotide reductase M2 subunit OS=Leishman          | 7        |
| 3.250100565        | -1.15489        | E9AR70            | tr E9AR70 E9AR70_LEIMU        | Uncharacterized protein OS=Leishmania mexicana (         | 4        |
| 2.513548199        | -1.15536        | E9ARF8            | tr E9ARF8 E9ARF8_LEIMU        | Uncharacterized protein OS=Leishmania mexicana (s        | 3        |
| 3.230108821        | -1.15701        | Q0QW09;E9         | tr Q0QW09 Q0QW09_LEIME        | Malate dehydrogenase OS=Leishmania mexicana              | 2        |
| 4.068462942        | -1.15834        | E9ANA1            | tr E9ANA1 E9ANA1_LEIMU        | Putative small GTP-binding protein Rab11 OS=Leish        | 4        |
| 3.175967319        | -1.16078        | E9AWJ4            | tr E9AWJ4 E9AWJ4_LEIMU        | Putative 60S ribosomal protein L17 OS=Leishmania         | 4        |
| 3.849268312        | -1.16176        | E9B6U3            | tr E9B6U3 E9B6U3_LEIMU        | Polyadenylate-binding protein OS=Leishmania mexi         | 15       |
| 2.756193399        | -1.16366        | E9B3U1            | tr E9B3U1 E9B3U1_LEIMU        | Uncharacterized protein OS=Leishmania mexicana (         | 2        |
| 3.836477571        | -1.16427        | E9AUG4            | tr E9AUG4 E9AUG4_LEIMU        | Uncharacterized protein OS=Leishmania mexicana           | 2        |
| 3.653941316        | -1.16469        | P16126;E9A        | sp P16126 DRTS_LEIAM          | Bifunctional dihydrofolate reductase-thymidylate synt    | 6        |
| 3.201462831        | -1.16726        | Q25318;E8         | tr Q25318 Q25318_LEIME        | LmCPb19 (Fragment) OS=Leishmania mexicana OX=            | 3        |

|             |          |            |                                                                                |    |
|-------------|----------|------------|--------------------------------------------------------------------------------|----|
| 3.208479934 | -1.16803 | E9AS32     | tr E9AS32 E9AS32_LEIMU Putative ABC transporter OS=Leishmania mexicana (       | 2  |
| 3.870524323 | -1.16974 | E9B0A4     | tr E9B0A4 E9B0A4_LEIMU Putative heat shock protein 70 OS=Leishmania mexi       | 3  |
| 3.912986381 | -1.17286 | E9AVH9     | tr E9AVH9 E9AVH9_LEIMU Proteasome subunit alpha type OS=Leishmania me:         | 4  |
| 4.33845807  | -1.17327 | E9B5Q7     | tr E9B5Q7 E9B5Q7_LEIMU Uncharacterized protein OS=Leishmania mexicana (        | 2  |
| 4.142818058 | -1.17611 | E9APG0     | tr E9APG0 E9APG0_LEIMU Uncharacterized protein OS=Leishmania mexicana (        | 12 |
| 4.083054983 | -1.17798 | E9AQY9     | tr E9AQY9 E9AQY9_LEIMU Putative peptidase t (Peptidase t, putative, metallo-   | 4  |
| 3.775678432 | -1.18167 | E9ALD8;E9B | tr E9ALD8 E9ALD8_LEIMU 40S ribosomal protein S19-like protein OS=Leishmar      | 4  |
| 3.20441203  | -1.18332 | E9AZE8     | tr E9AZE8 E9AZE8_LEIMU Putative TPR-repeat protein OS=Leishmania mexicar       | 3  |
| 4.071001735 | -1.18414 | E9ANK8;E9A | tr E9ANK8 E9ANK8_LEIMU Putative aminopeptidase (Metallo-peptidase, clan r      | 5  |
| 3.662475176 | -1.18613 | E9AW01     | tr E9AW01 E9AW01_LEIMU Uncharacterized protein OS=Leishmania mexicana          | 4  |
| 3.754671878 | -1.18958 | E9API2     | tr E9API2 E9API2_LEIMU Ubiquitin-conjugating enzyme-like protein OS=Leishrr    | 3  |
| 4.078401722 | -1.19094 | E9ALA2     | tr E9ALA2 E9ALA2_LEIMU Putative ubiquitin-conjugating enzyme e2 (Putative      | 2  |
| 3.115726183 | -1.19326 | E9AM67     | tr E9AM67 E9AM67_LEIMU Proteasome regulatory non-ATPase subunit,putati         | 8  |
| 3.046112434 | -1.19603 | E9APY0     | tr E9APY0 E9APY0_LEIMU Serine hydroxymethyltransferase OS=Leishmania m         | 2  |
| 3.658288343 | -1.19685 | Q9GU60;E9  | tr Q9GU60 Q9GU60_LEIAM Kinetoplast membrane protein 11 OS=Leishmania           | 4  |
| 4.262391184 | -1.20156 | E9B2G0     | tr E9B2G0 E9B2G0_LEIMU Proteasome regulatory non-ATP-ase subunit 8,puta        | 4  |
| 3.995297872 | -1.202   | E9AZ29     | tr E9AZ29 E9AZ29_LEIMU Putative T-complex protein 1, beta subunit OS=Leish     | 9  |
| 3.232597518 | -1.20597 | E9B430     | tr E9B430 E9B430_LEIMU Putative phosphoribosylpyrophosphate synthetase (       | 2  |
| 4.339269374 | -1.20736 | E9B6J0     | tr E9B6J0 E9B6J0_LEIMU Uncharacterized protein OS=Leishmania mexicana (st      | 3  |
| 3.738727466 | -1.20759 | E9AMI1     | tr E9AMI1 E9AMI1_LEIMU Stress-induced protein sti1 OS=Leishmania mexican       | 7  |
| 3.869450671 | -1.21159 | E9B0J8     | tr E9B0J8 E9B0J8_LEIMU GrpE protein homolog OS=Leishmania mexicana (stra       | 6  |
| 4.485869819 | -1.21954 | E9AV05     | tr E9AV05 E9AV05_LEIMU Uncharacterized protein OS=Leishmania mexicana (        | 2  |
| 3.534347814 | -1.22753 | E9AJK0     | tr E9AJK0 E9AJK0_LEIMU Proteasome regulatory non-ATPase subunit 6,putativ      | 5  |
| 3.237571577 | -1.22884 | Q7Z031;E9A | tr Q7Z031 Q7Z031_LEIAM Acidocalcisomal pyrophosphatase OS=Leishmania a         | 3  |
| 3.870530563 | -1.22931 | E9ASM3     | tr E9ASM3 E9ASM3_LEIMU Uncharacterized protein OS=Leishmania mexicana          | 2  |
| 3.35626686  | -1.23065 | E9ATH0     | tr E9ATH0 E9ATH0_LEIMU Eukaryotic translation initiation factor 3 subunit I O' | 6  |
| 3.905378894 | -1.23193 | Q5QHV5;E9  | tr Q5QHV5 Q5QHV5_LEIAM Rbp38p OS=Leishmania amazonensis OX=5659 PE             | 5  |
| 3.699268868 | -1.23197 | E9ALY7     | tr E9ALY7 E9ALY7_LEIMU Uncharacterized protein OS=Leishmania mexicana (s       | 3  |
| 3.639921181 | -1.23383 | E9ATR2     | tr E9ATR2 E9ATR2_LEIMU Uncharacterized protein OS=Leishmania mexicana (        | 2  |
| 4.478035991 | -1.23532 | E9B6X2     | tr E9B6X2 E9B6X2_LEIMU Putative mitochondrial phosphate transporter OS=Lu      | 5  |
| 3.371229352 | -1.23805 | E9ALW3     | tr E9ALW3 E9ALW3_LEIMU Uncharacterized protein OS=Leishmania mexicana          | 3  |
| 3.866464041 | -1.23893 | E9AV49     | tr E9AV49 E9AV49_LEIMU Putative methionyl-tRNA synthetase OS=Leishmanic        | 3  |
| 3.926417093 | -1.24161 | E9ARZ1     | tr E9ARZ1 E9ARZ1_LEIMU Putative 40S ribosomal protein S13 OS=Leishmania r      | 4  |
| 3.560997187 | -1.24593 | Q9BLW4;E9  | tr Q9BLW4 Q9BLW4_LEIME GDP-mannose pyrophosphorylase OS=Leishmania             | 3  |
| 4.527564113 | -1.2463  | Q95ZD7;E9A | tr Q95ZD7 Q95ZD7_LEIME Phosphomannomutase OS=Leishmania mexicana O'            | 4  |
| 4.272262353 | -1.24706 | E9ALE8     | tr E9ALE8 E9ALE8_LEIMU Uncharacterized protein OS=Leishmania mexicana (s       | 2  |
| 3.868706441 | -1.24833 | E9B228     | tr E9B228 E9B228_LEIMU Uncharacterized protein OS=Leishmania mexicana (s       | 2  |
| 3.918068118 | -1.24936 | E9ATT5;E9A | tr E9ATT5 E9ATT5_LEIMU 40S ribosomal protein SA OS=Leishmania mexicana (       | 8  |
| 3.75528803  | -1.25163 | E9B3B0     | tr E9B3B0 E9B3B0_LEIMU Putative chaperonin alpha subunit OS=Leishmania n       | 11 |
| 3.294222872 | -1.2553  | E9APB1     | tr E9APB1 E9APB1_LEIMU Mitochondrial processing peptidase alpha subunit,p      | 3  |
| 3.76140115  | -1.25576 | E9ATA6     | tr E9ATA6 E9ATA6_LEIMU Putative 60S ribosomal protein L22 OS=Leishmania r      | 3  |
| 3.925559401 | -1.26101 | E9AM03     | tr E9AM03 E9AM03_LEIMU Putative U3 small nucleolar ribonucleoprotein pro'      | 3  |
| 3.562573571 | -1.26455 | E9B110     | tr E9B110 E9B110_LEIMU ADP-ribosylation factor-like protein OS=Leishmania r    | 3  |
| 3.964633525 | -1.26757 | E9AL77     | tr E9AL77 E9AL77_LEIMU Uncharacterized protein OS=Leishmania mexicana (s       | 3  |
| 4.081421532 | -1.2697  | E9AWH9     | tr E9AWH9 E9AWH9_LEIMU Uncharacterized protein OS=Leishmania mexicana;         | 3  |
| 3.90945519  | -1.27069 | E9ASQ6     | tr E9ASQ6 E9ASQ6_LEIMU Transitional endoplasmic reticulum ATPase,putative      | 14 |
| 3.835376396 | -1.2741  | E9B5M9     | tr E9B5M9 E9B5M9_LEIMU Proteasome subunit beta OS=Leishmania mexicana;         | 2  |
| 4.089637153 | -1.28373 | E9B6Z8     | tr E9B6Z8 E9B6Z8_LEIMU Uncharacterized protein OS=Leishmania mexicana (s       | 2  |
| 4.099214945 | -1.28603 | E9B5D9     | tr E9B5D9 E9B5D9_LEIMU RuvB-like helicase OS=Leishmania mexicana (strain       | 4  |
| 3.960556994 | -1.28814 | E9B3W9     | tr E9B3W9 E9B3W9_LEIMU Cysteine conjugate beta-lyase,aminotransferase-li       | 7  |
| 3.947017338 | -1.28923 | E9B4N4     | tr E9B4N4 E9B4N4_LEIMU Proteasome regulatory non-ATP-ase subunit 11,put        | 2  |
| 5.24809209  | -1.28999 | E9AK60;E9A | tr E9AK60 E9AK60_LEIMU Uncharacterized protein OS=Leishmania mexicana (        | 3  |
| 4.234343271 | -1.29284 | E9AVJ3     | tr E9AVJ3 E9AVJ3_LEIMU Putative heat shock protein DNAJ OS=Leishmania me       | 2  |
| 3.494803774 | -1.29314 | E9B001;Q5M | tr E9B001 E9B001_LEIMU Replication protein A subunit OS=Leishmania mexic       | 7  |
| 4.061064701 | -1.29348 | E8NHJ5;E9A | tr E8NHJ5 E8NHJ5_LEIMU WGS CADB00000000 data, contig 43 OS=Leishmania          | 5  |
| 3.588941047 | -1.2966  | E9AN84     | tr E9AN84 E9AN84_LEIMU Uncharacterized protein OS=Leishmania mexicana (        | 2  |
| 3.799766945 | -1.29792 | E9AZQ5     | tr E9AZQ5 E9AZQ5_LEIMU Ribonucleoside-diphosphate reductase OS=Leishma         | 3  |
| 3.262120875 | -1.30034 | E9AW05     | tr E9AW05 E9AW05_LEIMU Peptidyl-prolyl cis-trans isomerase OS=Leishmania       | 3  |
| 5.08274601  | -1.30178 | E9B2Q1     | tr E9B2Q1 E9B2Q1_LEIMU Uncharacterized protein OS=Leishmania mexicana (        | 2  |
| 3.084294424 | -1.31503 | E9AQ80     | tr E9AQ80 E9AQ80_LEIMU Uncharacterized protein OS=Leishmania mexicana          | 2  |
| 4.881682014 | -1.32179 | E9AXI7     | tr E9AXI7 E9AXI7_LEIMU Uncharacterized protein OS=Leishmania mexicana (st      | 2  |
| 3.773948626 | -1.32445 | E9B6B5     | tr E9B6B5 E9B6B5_LEIMU Putative aminopeptidase P OS=Leishmania mexican;        | 3  |
| 3.718820844 | -1.32464 | E9AQE0     | tr E9AQE0 E9AQE0_LEIMU Proliferating cell nuclear antigen OS=Leishmania m      | 5  |



|             |          |            |                                                                              |    |
|-------------|----------|------------|------------------------------------------------------------------------------|----|
| 3.868458525 | -1.33018 | E9B5M6     | tr E9B5M6 E9B5M6_LEIMU Coatomer subunit alpha OS=Leishmania mexicana         | 8  |
| 3.607560899 | -1.33215 | E9AKK2     | tr E9AKK2 E9AKK2_LEIMU Dipeptidyl peptidase 3 OS=Leishmania mexicana (str    | 11 |
| 3.459012413 | -1.33275 | E9B2C5     | tr E9B2C5 E9B2C5_LEIMU Uncharacterized protein OS=Leishmania mexicana (s     | 3  |
| 2.992868611 | -1.33377 | E9AM51     | tr E9AM51 E9AM51_LEIMU Uncharacterized protein OS=Leishmania mexicana        | 2  |
| 2.980523204 | -1.33775 | E9B2R2     | tr E9B2R2 E9B2R2_LEIMU Uncharacterized protein OS=Leishmania mexicana (s     | 3  |
| 3.911236204 | -1.33974 | E9ASD6     | tr E9ASD6 E9ASD6_LEIMU Elongation factor 2 OS=Leishmania mexicana (strain    | 31 |
| 4.338912657 | -1.34343 | E9AZN6     | tr E9AZN6 E9AZN6_LEIMU Uncharacterized protein OS=Leishmania mexicana (      | 2  |
| 4.30923025  | -1.3479  | E9AZN0     | tr E9AZN0 E9AZN0_LEIMU Serine/threonine-protein phosphatase OS=Leishma       | 2  |
| 4.066817693 | -1.35372 | E9B4G0     | tr E9B4G0 E9B4G0_LEIMU Coatomer subunit beta OS=Leishmania mexicana (s       | 4  |
| 3.487871616 | -1.35916 | E9AVP4     | tr E9AVP4 E9AVP4_LEIMU Putative proteasome regulatory ATPase subunit 5 O     | 6  |
| 3.358743008 | -1.35949 | E9APP0     | tr E9APP0 E9APP0_LEIMU Uncharacterized protein OS=Leishmania mexicana (s     | 5  |
| 3.684131842 | -1.36809 | E9ARC2     | tr E9ARC2 E9ARC2_LEIMU Uncharacterized protein OS=Leishmania mexicana (      | 12 |
| 4.065523885 | -1.36964 | E9APQ1     | tr E9APQ1 E9APQ1_LEIMU Uncharacterized protein OS=Leishmania mexicana (      | 2  |
| 4.331747372 | -1.37065 | E8NHJ8;E8N | tr E8NHJ8 E8NHJ8_LEIMU 60S acidic ribosomal protein P0 OS=Leishmania mex     | 7  |
| 3.883168115 | -1.37148 | E9AW86;E9  | tr E9AW86 E9AW86_LEIMU Acetyl-coenzyme A synthetase OS=Leishmania me         | 12 |
| 4.000227034 | -1.38074 | E9AST1     | tr E9AST1 E9AST1_LEIMU Proteasome subunit alpha type OS=Leishmania mexi      | 4  |
| 3.545972088 | -1.38296 | E9ATG0     | tr E9ATG0 E9ATG0_LEIMU Uncharacterized protein OS=Leishmania mexicana (      | 2  |
| 3.748757394 | -1.38733 | E9ANS8     | tr E9ANS8 E9ANS8_LEIMU Proteasome subunit beta OS=Leishmania mexicana        | 4  |
| 4.264179554 | -1.38877 | E9APT0     | tr E9APT0 E9APT0_LEIMU Putative calpain-like cysteine peptidase (Putative cy | 4  |
| 4.155956572 | -1.39616 | E9AYS1     | tr E9AYS1 E9AYS1_LEIMU Proteasome endopeptidase complex OS=Leishmania        | 3  |
| 4.449784424 | -1.39902 | E9AL33     | tr E9AL33 E9AL33_LEIMU Fe-S cluster assembly protein DRE2 OS=Leishmania r    | 2  |
| 3.86341608  | -1.39923 | E9ANW2     | tr E9ANW2 E9ANW2_LEIMU Uncharacterized protein OS=Leishmania mexicana;       | 2  |
| 3.739918128 | -1.40352 | E9AS20;E9A | tr E9AS20 E9AS20_LEIMU Putative kinesin OS=Leishmania mexicana (strain MH    | 3  |
| 4.291936077 | -1.40869 | E9AXF0     | sp E9AXF0 IF5A_LEIMU Eukaryotic translation initiation factor 5A OS=Leishmar | 6  |
| 3.65097177  | -1.41293 | E9B4B4     | tr E9B4B4 E9B4B4_LEIMU Putative translation initiation factor IF-2 OS=Leishm | 3  |
| 4.587904969 | -1.41859 | E9B5G5     | tr E9B5G5 E9B5G5_LEIMU Serine palmitoyltransferase-like protein OS=Leishm    | 2  |
| 3.777972675 | -1.42121 | E9AKN1;Q6  | tr E9AKN1 E9AKN1_LEIMU Uncharacterized protein OS=Leishmania mexicana (      | 9  |
| 3.971390801 | -1.42456 | E9AJK8     | tr E9AJK8 E9AJK8_LEIMU Uncharacterized protein OS=Leishmania mexicana (s     | 2  |
| 3.365545254 | -1.42933 | E9B085     | tr E9B085 E9B085_LEIMU Coatomer subunit gamma OS=Leishmania mexicana         | 3  |
| 5.229502631 | -1.43078 | E9AQZ5     | tr E9AQZ5 E9AQZ5_LEIMU Uncharacterized protein OS=Leishmania mexicana (      | 2  |
| 4.357432327 | -1.43121 | E9AZI2     | tr E9AZI2 E9AZI2_LEIMU Histone H2B OS=Leishmania mexicana (strain MHOM,      | 2  |
| 3.6050811   | -1.43281 | E9B609     | tr E9B609 E9B609_LEIMU Putative ubiquitin-conjugating enzyme e2 OS=Leishr    | 2  |
| 4.229286681 | -1.43439 | E9B2W9     | tr E9B2W9 E9B2W9_LEIMU Uncharacterized protein OS=Leishmania mexicana        | 4  |
| 3.68904346  | -1.45103 | E9B2J9     | tr E9B2J9 E9B2J9_LEIMU Putative RNA binding protein OS=Leishmania mexicar    | 6  |
| 4.226519684 | -1.45292 | E9B714     | tr E9B714 E9B714_LEIMU Uncharacterized protein OS=Leishmania mexicana (s     | 2  |
| 4.027673738 | -1.46063 | E9ATD8     | tr E9ATD8 E9ATD8_LEIMU Putative cysteine synthase OS=Leishmania mexican      | 6  |
| 3.477876935 | -1.46133 | E9AKI9     | tr E9AKI9 E9AKI9_LEIMU S-methyl-5-thioadenosine phosphorylase OS=Leishm      | 2  |
| 4.137593232 | -1.46401 | E9AXT3     | tr E9AXT3 E9AXT3_LEIMU Uncharacterized protein OS=Leishmania mexicana (s     | 2  |
| 4.095830023 | -1.46732 | E9AV90;Q8  | tr E9AV90 E9AV90_LEIMU Putative 40S ribosomal protein S23 OS=Leishmania      | 2  |
| 4.167742501 | -1.4728  | E9B2H5     | tr E9B2H5 E9B2H5_LEIMU Profilin OS=Leishmania mexicana (strain MHOM/GT       | 5  |
| 4.071874818 | -1.47389 | E9AKN6;E9  | tr E9AKN6 E9AKN6_LEIMU Putative ATP-binding cassette protein subfamily G,    | 2  |
| 3.802459022 | -1.47735 | E9AQ94     | tr E9AQ94 E9AQ94_LEIMU Putative 40S ribosomal protein S3 OS=Leishmania r     | 7  |
| 5.013432587 | -1.48527 | E9B6I5     | tr E9B6I5 E9B6I5_LEIMU Putative ubiquitin-activating enzyme e1 OS=Leishmar   | 4  |
| 4.218324409 | -1.48761 | E9AXZ5     | tr E9AXZ5 E9AXZ5_LEIMU Adenine phosphoribosyltransferase OS=Leishmania       | 2  |
| 3.987452461 | -1.50694 | E9B226     | tr E9B226 E9B226_LEIMU Putative 3,2-trans-enoyl-CoA isomerase, mitochondi    | 5  |
| 4.130174372 | -1.51784 | E9AQB1     | tr E9AQB1 E9AQB1_LEIMU 60S acidic ribosomal protein P2 OS=Leishmania me      | 5  |
| 4.114964527 | -1.53904 | E9AQI0     | tr E9AQI0 E9AQI0_LEIMU Protein tyrosine phosphatase-like protein OS=Leishn   | 3  |
| 3.534382306 | -1.54963 | O61059;E9  | tr O61059 O61059_LEIME Glucose transporter OS=Leishmania mexicana OX=5       | 3  |
| 4.218224844 | -1.55213 | E9AQV4     | tr E9AQV4 E9AQV4_LEIMU Uncharacterized protein OS=Leishmania mexicana        | 5  |
| 3.732425156 | -1.55384 | E9B730     | tr E9B730 E9B730_LEIMU Polyadenylate-binding protein OS=Leishmania mexic     | 10 |
| 3.798084581 | -1.55847 | E9AVM6     | tr E9AVM6 E9AVM6_LEIMU Putative 40S ribosomal protein S15 OS=Leishmani       | 2  |
| 3.448509225 | -1.57037 | E9B2Z9     | tr E9B2Z9 E9B2Z9_LEIMU Uncharacterized protein OS=Leishmania mexicana (s     | 6  |
| 3.856100067 | -1.58519 | E9B669;E9  | tr E9B669 E9B669_LEIMU Putative 60S Ribosomal protein L36 OS=Leishmania      | 3  |
| 4.409368639 | -1.5938  | E9B3L1     | tr E9B3L1 E9B3L1_LEIMU Putative ATP-binding cassette protein OS=Leishmani    | 2  |
| 4.077745935 | -1.60274 | E9ARG7     | tr E9ARG7 E9ARG7_LEIMU Uncharacterized protein OS=Leishmania mexicana (      | 4  |
| 4.397982956 | -1.61128 | E9ALW5;E9  | tr E9ALW5 E9ALW5_LEIMU Putative ribosomal protein L1a OS=Leishmania me       | 9  |
| 3.324012676 | -1.6195  | E9B2A6;E9  | tr E9B2A6 E9B2A6_LEIMU Iron/zinc transporter protein-like protein OS=Leishn  | 3  |
| 4.548176512 | -1.62209 | E9B4X7     | tr E9B4X7 E9B4X7_LEIMU Uncharacterized protein OS=Leishmania mexicana (s     | 3  |
| 4.267852827 | -1.62722 | E9AV22     | tr E9AV22 E9AV22_LEIMU Dihydrolipoamide acetyltransferaselike protein OS=    | 2  |
| 3.899527077 | -1.63223 | E9AUK0     | tr E9AUK0 E9AUK0_LEIMU CTP synthase OS=Leishmania mexicana (strain MHC       | 6  |
| 3.64564411  | -1.64671 | E9AZ74     | tr E9AZ74 E9AZ74_LEIMU Uncharacterized protein OS=Leishmania mexicana (s     | 2  |
| 4.044260604 | -1.65235 | E9B6X6     | tr E9B6X6 E9B6X6_LEIMU Uncharacterized protein OS=Leishmania mexicana (s     | 2  |
| 3.200683635 | -1.65985 | E9ATF9     | tr E9ATF9 E9ATF9_LEIMU Nascent polypeptide-associated complex subunit be     | 2  |

|             |          |            |                                                                               |   |
|-------------|----------|------------|-------------------------------------------------------------------------------|---|
| 4.14615152  | -1.6701  | E9ASR3     | tr E9ASR3 E9ASR3_LEIMU Putative translation elongation factor 1-beta OS=Lei   | 4 |
| 4.587616628 | -1.70519 | E9B547     | tr E9B547 E9B547_LEIMU Uncharacterized protein OS=Leishmania mexicana (s      | 5 |
| 3.334627316 | -1.75256 | E9AXI8     | tr E9AXI8 E9AXI8_LEIMU Uncharacterized protein OS=Leishmania mexicana (st     | 2 |
| 4.232135021 | -1.75652 | E9ANR0     | tr E9ANR0 E9ANR0_LEIMU Putative S-phase kinase-associated protein (Putativ    | 2 |
| 4.084118809 | -1.78819 | E9AUR8     | tr E9AUR8 E9AUR8_LEIMU Putative calpain-like cysteine peptidase OS=Leishm     | 3 |
| 4.593450888 | -1.7954  | E9B1E7;E9B | tr E9B1E7 E9B1E7_LEIMU Putative 60S acidic ribosomal protein P2 OS=Leishm;    | 5 |
| 4.20057321  | -1.81028 | E9B6Q4     | tr E9B6Q4 E9B6Q4_LEIMU Putative 60S ribosomal protein L27A/L29 OS=Leishr      | 3 |
| 4.132660887 | -1.88545 | E9AUQ8;E9  | tr E9AUQ8 E9AUQ8_LEIMU Putative calpain-like cysteine peptidase OS=Leishr     | 5 |
| 4.813952387 | -1.90777 | E9B072     | tr E9B072 E9B072_LEIMU Eukaryotic translation initiation factor,putative OS=l | 2 |
| 4.307801667 | -2.02918 | E9B533;E9A | tr E9B533 E9B533_LEIMU Putative ribosomal protein l35a OS=Leishmania mex      | 2 |
| 3.954283814 | -2.03819 | O46368;E9E | tr O46368 O46368_LEIME Surface protein amastin OS=Leishmania mexicana O       | 2 |
| 4.376294359 | -2.16828 | Q9NL78;Q9I | tr Q9NL78 Q9NL78_LEIAM Histone H3 OS=Leishmania amazonensis OX=5659 C         | 2 |
| 4.150676902 | -2.33644 | E8NHK6;E8I | tr E8NHK6 E8NHK6_LEIMU WGS CADB00000000 data, contig 52 (Fragment) OS         | 2 |

Table S8. High-confidence tanespimycin affected RBPs of *L.mexicana* amastigote.

| [-Log(P-value)] | Log2 FC | Protein IDs | Fasta headers                                                          | Unique peptides |
|-----------------|---------|-------------|------------------------------------------------------------------------|-----------------|
| 4.121399371     | 1.12651 | E9B4I0      | tr E9B4I0 E9B4I0_LEIMU Malate dehydrogenase OS=Leishmania mexicana     | 4               |
| 3.540031701     | 1.06091 | E9ALE3      | tr E9ALE3 E9ALE3_LEIMU Uncharacterized protein OS=Leishmania mexican   | 2               |
| 2.938793625     | 0.83964 | E9AUQ1      | tr E9AUQ1 E9AUQ1_LEIMU Putative phosphatidylinositol 3-kinase OS=Leisl | 2               |
| 2.930543953     | 0.82965 | E9AUW3      | tr E9AUW3 E9AUW3_LEIMU Uncharacterized protein OS=Leishmania mexi      | 2               |
| 2.896650685     | 0.82755 | E9AY81      | tr E9AY81 E9AY81_LEIMU Putative dynein heavy chain OS=Leishmania mex   | 2               |
| 2.865852205     | 0.75888 | E9ATU9      | tr E9ATU9 E9ATU9_LEIMU Uncharacterized protein OS=Leishmania mexica    | 2               |
| 2.198287548     | 0.65356 | E9AR86      | tr E9AR86 E9AR86_LEIMU Uncharacterized protein OS=Leishmania mexica    | 2               |
| 2.495171932     | 0.64891 | Q95PT4;E9   | tr Q95PT4 Q95PT4_LEIME Myo-inositol-1-phosphate synthase OS=Leishma    | 2               |
| 1.119272661     | 0.61108 | E9AMS5      | tr E9AMS5 E9AMS5_LEIMU Putative ubiquitin ligase OS=Leishmania mexica  | 2               |
| 2.562821094     | 0.60033 | E9AKA3      | tr E9AKA3 E9AKA3_LEIMU Uncharacterized protein OS=Leishmania mexica    | 2               |
| 1.745011307     | 0.48098 | E9AMC2      | tr E9AMC2 E9AMC2_LEIMU Uncharacterized protein OS=Leishmania mexic     | 2               |
| 2.19097214      | 0.4708  | E9B5Z0      | tr E9B5Z0 E9B5Z0_LEIMU Uncharacterized protein OS=Leishmania mexicar   | 2               |
| 2.137301507     | 0.46352 | E9AQY7      | tr E9AQY7 E9AQY7_LEIMU Uncharacterized protein OS=Leishmania mexica    | 2               |
| 1.884222345     | 0.45042 | E9AVX0      | tr E9AVX0 E9AVX0_LEIMU Protein MAK16 homolog OS=Leishmania mexica      | 2               |
| 2.305341613     | 0.43973 | E9AL32      | tr E9AL32 E9AL32_LEIMU Uncharacterized protein OS=Leishmania mexicar   | 3               |
| 1.444573131     | 0.43296 | E9AT88      | tr E9AT88 E9AT88_LEIMU Putative ATP synthase OS=Leishmania mexicana    | 2               |
| 1.805043111     | 0.40824 | E9B5V1      | tr E9B5V1 E9B5V1_LEIMU Uncharacterized protein OS=Leishmania mexica    | 2               |
| 1.843792585     | 0.39522 | E9B552      | tr E9B552 E9B552_LEIMU RuvB-like helicase OS=Leishmania mexicana (str  | 4               |
| 1.771679273     | 0.35515 | E9B028      | tr E9B028 E9B028_LEIMU Putative mitochondrial DEAD box protein OS=Lei  | 6               |
| 1.915049112     | -0.3448 | E9AZ84      | tr E9AZ84 E9AZ84_LEIMU Uncharacterized protein OS=Leishmania mexicar   | 8               |
| 1.89636695      | -0.3456 | E9B2N1      | tr E9B2N1 E9B2N1_LEIMU Putative dynein OS=Leishmania mexicana (strai   | 3               |
| 2.154104548     | -0.3463 | E9B2Z9      | tr E9B2Z9 E9B2Z9_LEIMU Uncharacterized protein OS=Leishmania mexicar   | 3               |
| 1.827549658     | -0.3482 | E9AV16      | tr E9AV16 E9AV16_LEIMU Putative DnaJ protein OS=Leishmania mexicana    | 4               |
| 1.773323485     | -0.3504 | E9AXQ3      | tr E9AXQ3 E9AXQ3_LEIMU Pyruvate dehydrogenase E1 component subuni      | 6               |
| 1.664253881     | -0.3505 | E9APF9      | tr E9APF9 E9APF9_LEIMU Uncharacterized protein OS=Leishmania mexicar   | 4               |
| 2.15416224      | -0.3511 | E9B677      | tr E9B677 E9B677_LEIMU Uncharacterized protein OS=Leishmania mexicar   | 8               |
| 2.572185919     | -0.3523 | E9B3G3      | tr E9B3G3 E9B3G3_LEIMU Uncharacterized protein OS=Leishmania mexica    | 2               |
| 1.640081017     | -0.3524 | E9AUS9      | tr E9AUS9 E9AUS9_LEIMU Putative axoneme central apparatus protein OS=  | 6               |
| 2.081947748     | -0.3524 | E9ASZ0      | tr E9ASZ0 E9ASZ0_LEIMU Putative DEAD box RNA helicase OS=Leishmania    | 7               |
| 2.173498831     | -0.3527 | E9B2F7      | tr E9B2F7 E9B2F7_LEIMU Uncharacterized protein OS=Leishmania mexicar   | 4               |
| 1.545839131     | -0.3528 | E9AVE3      | tr E9AVE3 E9AVE3_LEIMU Uncharacterized protein OS=Leishmania mexica    | 2               |
| 1.680211342     | -0.3532 | E9AKL0;Q8   | tr E9AKL0 E9AKL0_LEIMU Stomatin-like protein OS=Leishmania mexicana (  | 2               |
| 3.23319966      | -0.354  | E9AN22      | tr E9AN22 E9AN22_LEIMU Uncharacterized protein OS=Leishmania mexica    | 2               |
| 1.531524072     | -0.3555 | E9AS50;E9   | tr E9AS50 E9AS50_LEIMU 4-coumarate:coa ligase-like protein OS=Leishma  | 2               |
| 1.790662306     | -0.3563 | E9AWI7      | tr E9AWI7 E9AWI7_LEIMU Uncharacterized protein OS=Leishmania mexica    | 2               |
| 1.792264487     | -0.3567 | E9B478      | tr E9B478 E9B478_LEIMU Putative heat shock protein OS=Leishmania mex   | 17              |
| 1.466089739     | -0.3569 | E9AT87      | tr E9AT87 E9AT87_LEIMU Uncharacterized protein OS=Leishmania mexicar   | 2               |
| 1.814827489     | -0.3571 | E9ALK3      | tr E9ALK3 E9ALK3_LEIMU Putative GTP-binding protein OS=Leishmania me   | 16              |
| 1.862434676     | -0.3571 | E9B6L3;Q8   | tr E9B6L3 E9B6L3_LEIMU 6-phosphogluconate dehydrogenase, decarboxyl    | 2               |
| 2.672765154     | -0.3575 | E9AJM8      | tr E9AJM8 E9AJM8_LEIMU Uncharacterized protein OS=Leishmania mexica    | 4               |
| 1.707037313     | -0.3577 | E9B099;QC   | tr E9B099 E9B099_LEIMU Putative heat-shock protein hsp70 OS=Leishman   | 22              |
| 1.962319981     | -0.3593 | E9B5Q7      | tr E9B5Q7 E9B5Q7_LEIMU Uncharacterized protein OS=Leishmania mexica    | 4               |
| 1.52532595      | -0.3593 | E9B4E9      | tr E9B4E9 E9B4E9_LEIMU Uncharacterized protein OS=Leishmania mexicar   | 5               |
| 1.765286769     | -0.3597 | E9ATT5;E9   | tr E9ATT5 E9ATT5_LEIMU 40S ribosomal protein SA OS=Leishmania mexica   | 9               |
| 1.643608096     | -0.3609 | E9AS67      | tr E9AS67 E9AS67_LEIMU Uncharacterized protein OS=Leishmania mexicar   | 5               |
| 2.116021901     | -0.3614 | E9AVL4      | tr E9AVL4 E9AVL4_LEIMU Uncharacterized protein OS=Leishmania mexicar   | 8               |
| 1.402744716     | -0.3617 | E9B226      | tr E9B226 E9B226_LEIMU Putative 3,2-trans-enoyl-CoA isomerase, mitoch  | 2               |
| 1.705562638     | -0.3618 | E9B1G1      | tr E9B1G1 E9B1G1_LEIMU Uncharacterized protein OS=Leishmania mexica    | 2               |
| 1.416708995     | -0.3624 | E9B3P7      | tr E9B3P7 E9B3P7_LEIMU Uncharacterized protein OS=Leishmania mexicar   | 3               |
| 1.663534207     | -0.3626 | E9B620      | tr E9B620 E9B620_LEIMU Putative threonyl-tRNA synthetase OS=Leishmar   | 9               |
| 1.811150265     | -0.3626 | E9AKR8      | tr E9AKR8 E9AKR8_LEIMU Putative 60S ribosomal protein L19 OS=Leishma   | 3               |
| 1.854888435     | -0.3628 | E9AVB8      | tr E9AVB8 E9AVB8_LEIMU Structural maintenance of chromosomes protei    | 2               |
| 1.815613012     | -0.3632 | E9B422      | tr E9B422 E9B422_LEIMU Putative ABC transporter OS=Leishmania mexica   | 3               |

|                    |                |                                         |                                                         |          |
|--------------------|----------------|-----------------------------------------|---------------------------------------------------------|----------|
| 1.238760631        | -0.3641        | E9AW22;E9 tr E9AW22 E9AW22_LEIMU        | Putative ATP-binding cassette protein subfam            | 2        |
| <b>2.104600108</b> | <b>-0.3647</b> | <b>E9AP81 tr E9AP81 E9AP81_LEIMU</b>    | <b>40S ribosomal protein S12 OS=Leishmania mexi</b>     | <b>6</b> |
| 1.515354636        | -0.3647        | E9AJK7 tr E9AJK7 E9AJK7_LEIMU           | Uncharacterized protein OS=Leishmania mexican           | 4        |
| 1.319079318        | -0.3647        | E9AMI1 tr E9AMI1 E9AMI1_LEIMU           | Stress-induced protein sti1 OS=Leishmania mexi          | 3        |
| 1.633972478        | -0.3647        | E9AZQ5 tr E9AZQ5 E9AZQ5_LEIMU           | Ribonucleoside-diphosphate reductase OS=Leisi           | 3        |
| 1.832107105        | -0.3652        | E9B085 tr E9B085 E9B085_LEIMU           | Coatomer subunit gamma OS=Leishmania mexic              | 4        |
| 2.269371878        | -0.3655        | E9AYZ5 tr E9AYZ5 E9AYZ5_LEIMU           | Putative isovaleryl-coA dehydrogenase OS=Leish          | 4        |
| <b>2.09971106</b>  | <b>-0.3656</b> | <b>E9ATM0 tr E9ATM0 E9ATM0_LEIMU</b>    | <b>Proteasome regulatory ATPase subunit OS=Lei:</b>     | <b>2</b> |
| 1.408910828        | -0.3664        | E9ATL1 tr E9ATL1 E9ATL1_LEIMU           | Uncharacterized protein OS=Leishmania mexican           | 4        |
| 1.543530567        | -0.3671        | E9B1A6 tr E9B1A6 E9B1A6_LEIMU           | Uncharacterized protein OS=Leishmania mexica            | 4        |
| 2.107568945        | -0.3679        | P16126;E9 sp P16126 DRTS_LEIAM          | Bifunctional dihydrofolate reductase-thymidylate s      | 7        |
| 1.355158093        | -0.3684        | E9B2B7 tr E9B2B7 E9B2B7_LEIMU           | Uncharacterized protein OS=Leishmania mexica            | 2        |
| 1.928182159        | -0.3687        | E9AVY6 tr E9AVY6 E9AVY6_LEIMU           | Alanine--tRNA ligase OS=Leishmania mexicana (s          | 16       |
| 1.396063457        | -0.3687        | E9B760 tr E9B760 E9B760_LEIMU           | Uncharacterized protein OS=Leishmania mexica            | 6        |
| 1.952197357        | -0.3689        | E9AQV6;H tr E9AQV6 E9AQV6_LEIMU         | Paraflagellar rod protein 2C OS=Leishmania me           | 2        |
| 1.76262146         | -0.369         | E9ARS1 tr E9ARS1 E9ARS1_LEIMU           | Putative heat shock protein OS=Leishmania mex           | 27       |
| 1.856091594        | -0.3691        | E9B430 tr E9B430 E9B430_LEIMU           | Putative phosphoribosylpyrophosphate syntheta           | 3        |
| 1.699823524        | -0.3697        | A0A0R6YB tr A0A0R6YBU4 A0A0R6YBU4_LEIME | Thiamine biosynthesis-like protein (Fr                  | 6        |
| 1.722422275        | -0.37          | E9AZ36 tr E9AZ36 E9AZ36_LEIMU           | Uncharacterized protein OS=Leishmania mexica            | 9        |
| 1.804425065        | -0.3704        | E9B3B0 tr E9B3B0 E9B3B0_LEIMU           | Putative chaperonin alpha subunit OS=Leishman           | 12       |
| 2.09864229         | -0.3712        | E9ANM5 tr E9ANM5 E9ANM5_LEIMU           | Uncharacterized protein OS=Leishmania mexi              | 2        |
| 2.261413127        | -0.372         | E9AL41 tr E9AL41 E9AL41_LEIMU           | Uncharacterized protein OS=Leishmania mexica            | 3        |
| 1.924750278        | -0.3725        | E9ATW8 tr E9ATW8 E9ATW8_LEIMU           | Uncharacterized protein OS=Leishmania mexic             | 8        |
| 1.652463486        | -0.3725        | E9B0L7 tr E9B0L7 E9B0L7_LEIMU           | Putative adenosine kinase OS=Leishmania mexic           | 7        |
| 1.658760464        | -0.3726        | E9B074 tr E9B074 E9B074_LEIMU           | Uncharacterized protein OS=Leishmania mexica            | 2        |
| 1.329856808        | -0.3728        | E9B6S2 tr E9B6S2 E9B6S2_LEIMU           | Uncharacterized protein OS=Leishmania mexica            | 2        |
| 1.294032687        | -0.3731        | E9ALL7 tr E9ALL7 E9ALL7_LEIMU           | Uncharacterized protein OS=Leishmania mexican           | 3        |
| <b>1.921006889</b> | <b>-0.3735</b> | <b>E9ARK0 tr E9ARK0 E9ARK0_LEIMU</b>    | <b>Putative 60S ribosomal protein L10a OS=Leishm</b>    | <b>4</b> |
| 1.659249062        | -0.3742        | E9AWK3 tr E9AWK3 E9AWK3_LEIMU           | Ankyrin/TPR repeat protein OS=Leishmania m              | 4        |
| 1.794161876        | -0.3753        | E9ATK7 tr E9ATK7 E9ATK7_LEIMU           | Uncharacterized protein OS=Leishmania mexica            | 14       |
| 1.498014614        | -0.3753        | E9ANI7 tr E9ANI7 E9ANI7_LEIMU           | Ribosome biogenesis protein BOP1 homolog OS=            | 3        |
| 1.60726501         | -0.3758        | E9AZU7 tr E9AZU7 E9AZU7_LEIMU           | Putative phenylalanine-4-hydroxylase OS=Leishi          | 3        |
| 1.565655863        | -0.3762        | E9B1J0 tr E9B1J0 E9B1J0_LEIMU           | Putative calpain-like cysteine peptidase OS=Leishi      | 2        |
| 1.582704213        | -0.3775        | E9AMX3 tr E9AMX3 E9AMX3_LEIMU           | Putative AAA family ATPase OS=Leishmania m              | 10       |
| 1.759494943        | -0.3776        | E9APJ0 tr E9APJ0 E9APJ0_LEIMU           | Putative chaperonin TCP20 OS=Leishmania mexic           | 10       |
| <b>1.585396934</b> | <b>-0.3779</b> | <b>E9ASH6;O tr E9ASH6 E9ASH6_LEIMU</b>  | <b>Elongation factor G, mitochondrial OS=Leishmar</b>   | <b>7</b> |
| 2.147832464        | -0.3796        | Q4KXA7;E9 tr Q4KXA7 Q4KXA7_LEIME        | Cytoplasmic dynein heavy chain 2.2 OS=Leishma           | 4        |
| 1.426423631        | -0.3797        | E9ARZ6 tr E9ARZ6 E9ARZ6_LEIMU           | Putative nucleosome assembly protein OS=Leish           | 4        |
| 2.230489179        | -0.3799        | E9AZA2 tr E9AZA2 E9AZA2_LEIMU           | Putative rRNA methyltransferase OS=Leishmani            | 3        |
| 1.643620298        | -0.3808        | E9API9 tr E9API9 E9API9_LEIMU           | Putative dynein heavy chain OS=Leishmania mexi          | 38       |
| 1.289449376        | -0.3809        | E9AL69 tr E9AL69 E9AL69_LEIMU           | Uncharacterized protein OS=Leishmania mexica            | 3        |
| 2.190279014        | -0.381         | E9AJZ0 tr E9AJZ0 E9AJZ0_LEIMU           | DNA topoisomerase type IB small subunit OS=Leis         | 3        |
| 2.162105353        | -0.3815        | E9AU29 tr E9AU29 E9AU29_LEIMU           | Uncharacterized protein OS=Leishmania mexica            | 2        |
| 1.560771331        | -0.3816        | E9AZB9 tr E9AZB9 E9AZB9_LEIMU           | Uncharacterized protein OS=Leishmania mexica            | 2        |
| 1.811192571        | -0.3817        | E9ATD8 tr E9ATD8 E9ATD8_LEIMU           | Putative cysteine synthase OS=Leishmania mexi           | 5        |
| 2.862305743        | -0.3823        | E9AQW0;E9 tr E9AQW0 E9AQW0_LEIMU        | Putative kinesin OS=Leishmania mexicana (str            | 2        |
| 1.227398924        | -0.3829        | E9APH6 tr E9APH6 E9APH6_LEIMU           | Uncharacterized protein OS=Leishmania mexica            | 2        |
| 1.778770582        | -0.3831        | E9B1L5 tr E9B1L5 E9B1L5_LEIMU           | Uncharacterized protein OS=Leishmania mexican           | 2        |
| 1.679561733        | -0.3842        | E9B2V1 tr E9B2V1 E9B2V1_LEIMU           | Uncharacterized protein OS=Leishmania mexica            | 6        |
| 1.556065107        | -0.3843        | E9AQV1 tr E9AQV1 E9AQV1_LEIMU           | Uncharacterized protein OS=Leishmania mexic             | 2        |
| 1.685382259        | -0.3844        | E9B2C5 tr E9B2C5 E9B2C5_LEIMU           | Uncharacterized protein OS=Leishmania mexica            | 3        |
| 2.475911134        | -0.3847        | E9B1B7 tr E9B1B7 E9B1B7_LEIMU           | Uncharacterized protein OS=Leishmania mexica            | 3        |
| 2.054036985        | -0.3857        | E9B6I5 tr E9B6I5 E9B6I5_LEIMU           | Putative ubiquitin-activating enzyme e1 OS=Leishi       | 7        |
| <b>2.154003631</b> | <b>-0.3865</b> | <b>E9ASE2 tr E9ASE2 E9ASE2_LEIMU</b>    | <b>eIF3-interacting protein-like protein OS=Leishma</b> | <b>4</b> |
| 2.231280665        | -0.3866        | E9B038 tr E9B038 E9B038_LEIMU           | Uncharacterized protein OS=Leishmania mexica            | 10       |
| 1.952908261        | -0.3871        | E9APW3;Q tr E9APW3 E9APW3_LEIMU         | Enolase OS=Leishmania mexicana (strain MHO              | 11       |
| 1.552040097        | -0.3876        | E9AWL4 tr E9AWL4 E9AWL4_LEIMU           | Putative ATP-dependent RNA helicase OS=Leisl            | 2        |



|             |         |           |                        |                                                     |    |
|-------------|---------|-----------|------------------------|-----------------------------------------------------|----|
| 2.247789261 | -0.3879 | E9AZZ2    | tr E9AZZ2 E9AZZ2_LEIMU | Proteasome regulatory non-ATP-ase subunit 2,pu      | 4  |
| 1.836934335 | -0.3886 | E9AL37    | tr E9AL37 E9AL37_LEIMU | Acetylornithine deacetylase-like protein OS=Leisl   | 4  |
| 1.2685231   | -0.3887 | E9B6S3    | tr E9B6S3 E9B6S3_LEIMU | Putative PRP8 protein homologue (U5 snrna-assc      | 2  |
| 1.552398064 | -0.3895 | E9AV82    | tr E9AV82 E9AV82_LEIMU | Uncharacterized protein OS=Leishmania mexica        | 8  |
| 1.519890473 | -0.39   | E9ALG1    | tr E9ALG1 E9ALG1_LEIMU | Uncharacterized protein OS=Leishmania mexica        | 11 |
| 1.957719176 | -0.3901 | E9AJQ5;F5 | tr E9AJQ5 E9AJQ5_LEIMU | Delta-1-pyrroline-5-carboxylate dehydrogenase,      | 12 |
| 1.946101004 | -0.3903 | E9AQ24    | tr E9AQ24 E9AQ24_LEIMU | Lysine--tRNA ligase OS=Leishmania mexicana (s       | 7  |
| 1.996981963 | -0.3904 | E9B1E2    | tr E9B1E2 E9B1E2_LEIMU | Uncharacterized protein OS=Leishmania mexicar       | 12 |
| 1.904474236 | -0.3906 | E9B4B4    | tr E9B4B4 E9B4B4_LEIMU | Putative translation initiation factor IF-2 OS=Leis | 4  |
| 1.334028013 | -0.3913 | E9B235    | tr E9B235 E9B235_LEIMU | Uncharacterized protein OS=Leishmania mexicar       | 4  |
| 1.662673496 | -0.3922 | E9B1K4    | tr E9B1K4 E9B1K4_LEIMU | Putative ATP-binding cassette protein subfamily     | 3  |
| 1.292464451 | -0.3927 | E9AQP7    | tr E9AQP7 E9AQP7_LEIMU | Uncharacterized protein OS=Leishmania mexica        | 2  |
| 2.023648749 | -0.393  | E9AVE1    | tr E9AVE1 E9AVE1_LEIMU | Putative RNA helicase OS=Leishmania mexicana        | 7  |
| 1.840995874 | -0.393  | E9B5J1    | tr E9B5J1 E9B5J1_LEIMU | Uncharacterized protein OS=Leishmania mexican       | 2  |
| 1.878083131 | -0.3931 | E9AV50    | tr E9AV50 E9AV50_LEIMU | Uncharacterized protein OS=Leishmania mexica        | 2  |
| 2.147167062 | -0.3939 | E9AXJ1    | tr E9AXJ1 E9AXJ1_LEIMU | Aldehyde dehydrogenase, mitochondrial OS=Leis       | 2  |
| 2.154969792 | -0.3971 | E9B2L3    | tr E9B2L3 E9B2L3_LEIMU | Ethanolamine-phosphate cytidyltransferase,pu        | 2  |
| 1.358134418 | -0.3977 | E9AUA1    | tr E9AUA1 E9AUA1_LEIMU | 2,3-bisphosphoglycerate-independent phospho         | 2  |
| 1.94764322  | -0.3978 | E9B0H1;E9 | tr E9B0H1 E9B0H1_LEIMU | Putative aspartyl-tRNA synthetase OS=Leishmar       | 6  |
| 1.18593249  | -0.398  | E9AXD9    | tr E9AXD9 E9AXD9_LEIMU | DNA-directed RNA polymerase subunit beta OS:        | 3  |
| 2.34467571  | -0.3995 | E9B4H8    | tr E9B4H8 E9B4H8_LEIMU | Putative adenylate kinase OS=Leishmania mexic       | 3  |
| 1.591723176 | -0.3996 | E9AMIO    | tr E9AMIO E9AMIO_LEIMU | Uncharacterized protein OS=Leishmania mexica        | 5  |
| 1.74968361  | -0.3999 | E9AUF0;E9 | tr E9AUF0 E9AUF0_LEIMU | Phosphoglycerate kinase OS=Leishmania mexica        | 9  |
| 1.806155654 | -0.4004 | E9AY14    | tr E9AY14 E9AY14_LEIMU | C-1-tetrahydrofolate synthase, cytoplasmic,puta     | 3  |
| 2.598989687 | -0.401  | E9B4I7    | tr E9B4I7 E9B4I7_LEIMU | Uncharacterized protein OS=Leishmania mexican       | 2  |
| 1.845974558 | -0.4011 | E9ALV8;A5 | tr E9ALV8 E9ALV8_LEIMU | Putative tryparedoxin OS=Leishmania mexicana        | 2  |
| 1.767789404 | -0.4011 | E9AW84    | tr E9AW84 E9AW84_LEIMU | 3-ketoacyl-CoA thiolase-like protein OS=Leishr      | 9  |
| 1.841356866 | -0.402  | E9ATZ6    | tr E9ATZ6 E9ATZ6_LEIMU | Putative isoleucyl-tRNA synthetase OS=Leishmar      | 7  |
| 1.729680746 | -0.4021 | E9AT13    | tr E9AT13 E9AT13_LEIMU | Putative tyrosine aminotransferase OS=Leishma       | 11 |
| 2.098210386 | -0.4023 | E9AQX9    | tr E9AQX9 E9AQX9_LEIMU | Uncharacterized protein OS=Leishmania mexica        | 6  |
| 1.84140246  | -0.4037 | E9B2B3    | tr E9B2B3 E9B2B3_LEIMU | Methylcrotonoyl-coa carboxylase biotinylated su     | 5  |
| 2.03505178  | -0.4037 | E9AZ73    | tr E9AZ73 E9AZ73_LEIMU | Putative eukaryotic translation release factor OS   | 12 |
| 2.075247966 | -0.4046 | E9ASQ6    | tr E9ASQ6 E9ASQ6_LEIMU | Transitional endoplasmic reticulum ATPase,put       | 13 |
| 1.325059704 | -0.4051 | E9AZA7;E9 | tr E9AZA7 E9AZA7_LEIMU | Branched-chain-amino-acid aminotransferase O        | 2  |
| 2.056526362 | -0.4058 | E9AVZ4    | tr E9AVZ4 E9AVZ4_LEIMU | Uncharacterized protein OS=Leishmania mexica        | 3  |
| 1.825295095 | -0.4073 | E9B5X5    | tr E9B5X5 E9B5X5_LEIMU | Uncharacterized protein OS=Leishmania mexicar       | 2  |
| 1.691728553 | -0.4076 | E9ARA9    | tr E9ARA9 E9ARA9_LEIMU | Putative L-gulonolactone oxidase OS=Leishmani       | 2  |
| 1.864282969 | -0.4082 | E9AQD3    | tr E9AQD3 E9AQD3_LEIMU | Putative nucleolar RNA binding protein OS=Leis      | 13 |
| 1.432211642 | -0.409  | E9AXL3    | tr E9AXL3 E9AXL3_LEIMU | Uncharacterized protein OS=Leishmania mexicar       | 2  |
| 1.977867099 | -0.4092 | E9AZT2    | tr E9AZT2 E9AZT2_LEIMU | Putative electron-transfer-flavoprotein, alpha po   | 4  |
| 2.040910603 | -0.4095 | E9AWL7    | tr E9AWL7 E9AWL7_LEIMU | Dynein intermediate-chain-like protein OS=Leis      | 3  |
| 2.57903217  | -0.4095 | E9B0V3    | tr E9B0V3 E9B0V3_LEIMU | Uncharacterized protein OS=Leishmania mexica        | 2  |
| 2.000701799 | -0.4098 | E9AQL8;Q5 | tr E9AQL8 E9AQL8_LEIMU | Putative carbamoyl-phosphate synthase OS=Lei:       | 30 |
| 2.635182373 | -0.4102 | E9AL58    | tr E9AL58 E9AL58_LEIMU | Uncharacterized protein OS=Leishmania mexicar       | 5  |
| 1.620338573 | -0.4109 | E9ALW5;E5 | tr E9ALW5 E9ALW5_LEIMU | Putative ribosomal protein L1a OS=Leishmania        | 9  |
| 1.782256039 | -0.4113 | E9AZK7    | tr E9AZK7 E9AZK7_LEIMU | Uncharacterized protein OS=Leishmania mexicar       | 2  |
| 1.419998163 | -0.4146 | E9AV49    | tr E9AV49 E9AV49_LEIMU | Putative methionyl-tRNA synthetase OS=Leishm        | 3  |
| 1.965473146 | -0.4156 | E9B473    | tr E9B473 E9B473_LEIMU | Succinyl-CoA:3-ketoacid-coenzyme A transferase      | 8  |
| 1.705057189 | -0.4163 | E9AM02    | tr E9AM02 E9AM02_LEIMU | Putative lipophosphoglycan biosynthetic prote       | 4  |
| 2.03240035  | -0.4164 | E9AZ25    | tr E9AZ25 E9AZ25_LEIMU | Uncharacterized protein OS=Leishmania mexicar       | 5  |
| 2.088199151 | -0.4167 | E9B6I9    | tr E9B6I9 E9B6I9_LEIMU | Putative ATP-dependent RNA helicase OS=Leishm       | 23 |
| 1.918356361 | -0.4169 | E9AXM1    | tr E9AXM1 E9AXM1_LEIMU | GTP-binding nuclear protein OS=Leishmania m         | 7  |
| 1.490442231 | -0.4175 | E9AMH0    | tr E9AMH0 E9AMH0_LEIMU | Uncharacterized protein OS=Leishmania mexic         | 3  |
| 2.078742255 | -0.4188 | E9AK58    | tr E9AK58 E9AK58_LEIMU | Putative 60S ribosomal protein L10 OS=Leishma       | 7  |
| 2.380684405 | -0.4193 | E9AM77    | tr E9AM77 E9AM77_LEIMU | Transcription factor-like protein OS=Leishmani      | 10 |
| 1.908821284 | -0.4194 | E9B296    | tr E9B296 E9B296_LEIMU | Putative serine/threonine-protein kinase OS=Lei:    | 2  |
| 1.319108248 | -0.4194 | E9ASK9    | tr E9ASK9 E9ASK9_LEIMU | Eukaryotic translation initiation factor 6 OS=Leis  | 2  |

|             |         |           |                        |                                                     |    |
|-------------|---------|-----------|------------------------|-----------------------------------------------------|----|
| 1.977874253 | -0.4195 | E9AJV2    | tr E9AJV2 E9AJV2_LEIMU | Uncharacterized protein OS=Leishmania mexican       | 11 |
| 1.814039246 | -0.4202 | E9AV10    | tr E9AV10 E9AV10_LEIMU | Uncharacterized protein OS=Leishmania mexica        | 8  |
| 2.285151832 | -0.4213 | E9ANZ0    | tr E9ANZ0 E9ANZ0_LEIMU | Putative alanine aminotransferase OS=Leishmar       | 4  |
| 1.208157027 | -0.4217 | E9B6P8    | tr E9B6P8 E9B6P8_LEIMU | Putative Gim5A protein (Glycosomal membrane         | 4  |
| 1.796583897 | -0.4219 | E9B2M5    | tr E9B2M5 E9B2M5_LEIMU | Chaperonin containing t-complex protein,puta        | 5  |
| 2.355470388 | -0.4234 | E9AJX2    | tr E9AJX2 E9AJX2_LEIMU | Uncharacterized protein OS=Leishmania mexican       | 2  |
| 2.352508603 | -0.4238 | E9AWE0    | tr E9AWE0 E9AWE0_LEIMU | T-complex protein 1 subunit gamma OS=Leishr         | 14 |
| 2.062494743 | -0.4249 | E9AZ29    | tr E9AZ29 E9AZ29_LEIMU | Putative T-complex protein 1, beta subunit OS=L     | 8  |
| 1.839186303 | -0.425  | E9AKA4;C6 | tr E9AKA4 E9AKA4_LEIMU | Actin OS=Leishmania mexicana (strain MHOM/C         | 7  |
| 2.015696358 | -0.4252 | E9AR10    | tr E9AR10 E9AR10_LEIMU | Uncharacterized protein OS=Leishmania mexica        | 2  |
| 1.917651807 | -0.4254 | E9AYU4    | tr E9AYU4 E9AYU4_LEIMU | Ribokinase OS=Leishmania mexicana (strain MH        | 2  |
| 2.188761201 | -0.4264 | E9AX84    | tr E9AX84 E9AX84_LEIMU | Putative poly(A)-binding protein OS=Leishmania      | 9  |
| 1.786883408 | -0.4269 | E9B5U7    | tr E9B5U7 E9B5U7_LEIMU | Uncharacterized protein OS=Leishmania mexica        | 8  |
| 1.870730518 | -0.4275 | E9AQG7    | tr E9AQG7 E9AQG7_LEIMU | Uncharacterized protein OS=Leishmania mexic         | 4  |
| 2.106055502 | -0.428  | E9AJY2;A0 | tr E9AJY2 E9AJY2_LEIMU | Elongation initiation factor 2 alpha subunit,putati | 7  |
| 1.737237694 | -0.4281 | E9APS7    | tr E9APS7 E9APS7_LEIMU | Uncharacterized protein OS=Leishmania mexicar       | 2  |
| 1.73536773  | -0.4283 | E9B2Z5    | tr E9B2Z5 E9B2Z5_LEIMU | Uncharacterized protein OS=Leishmania mexicar       | 5  |
| 1.886602311 | -0.4286 | E9AX01    | tr E9AX01 E9AX01_LEIMU | Uncharacterized protein OS=Leishmania mexica        | 7  |
| 1.638941551 | -0.4289 | E9AY42    | tr E9AY42 E9AY42_LEIMU | Uncharacterized protein OS=Leishmania mexicar       | 3  |
| 2.039929481 | -0.4291 | E9AMY4    | tr E9AMY4 E9AMY4_LEIMU | Putative paraflagellar rod component OS=Leish       | 5  |
| 1.992424012 | -0.4294 | E9AXI8    | tr E9AXI8 E9AXI8_LEIMU | Uncharacterized protein OS=Leishmania mexican       | 2  |
| 2.032429416 | -0.4296 | E9B170;A0 | tr E9B170 E9B170_LEIMU | Glyceraldehyde-3-phosphate dehydrogenase OS         | 7  |
| 1.852298444 | -0.4305 | E9ALU2    | tr E9ALU2 E9ALU2_LEIMU | Putative carnitine/choline acetyltransferase OS=    | 3  |
| 1.575635804 | -0.4307 | E9B5Z9    | tr E9B5Z9 E9B5Z9_LEIMU | Putative pre-mRNA splicing factor ATP-depender      | 3  |
| 2.56978477  | -0.4309 | E9B549    | tr E9B549 E9B549_LEIMU | Uncharacterized protein OS=Leishmania mexicar       | 5  |
| 2.115036757 | -0.4316 | E9AUD1;A  | tr E9AUD1 E9AUD1_LEIMU | Protein disulfide-isomerase OS=Leishmania me        | 11 |
| 2.289335738 | -0.4319 | E9AZ08    | tr E9AZ08 E9AZ08_LEIMU | Putative cysteine desulfurase OS=Leishmania me      | 6  |
| 1.998446883 | -0.4335 | E9AV48    | tr E9AV48 E9AV48_LEIMU | Uncharacterized protein OS=Leishmania mexica        | 8  |
| 2.291308854 | -0.4339 | E9B2C2    | tr E9B2C2 E9B2C2_LEIMU | Uncharacterized protein OS=Leishmania mexica        | 9  |
| 1.741549294 | -0.4341 | E9AZ50    | tr E9AZ50 E9AZ50_LEIMU | Uncharacterized protein OS=Leishmania mexicar       | 5  |
| 1.660609949 | -0.4355 | E9B4N7    | tr E9B4N7 E9B4N7_LEIMU | Uncharacterized protein OS=Leishmania mexica        | 2  |
| 2.481699444 | -0.4368 | E9ATM4    | tr E9ATM4 E9ATM4_LEIMU | ATP-dependent RNA helicase-like protein OS=L        | 3  |
| 2.685860097 | -0.4374 | E8NHK6;E8 | tr E8NHK6 E8NHK6_LEIMU | WGS CABD00000000 data, contig 52 (Fragment          | 2  |
| 1.438666405 | -0.4377 | E9ALW3    | tr E9ALW3 E9ALW3_LEIMU | Uncharacterized protein OS=Leishmania mexic         | 3  |
| 1.742526206 | -0.4379 | E9AYA3;Q2 | tr E9AYA3 E9AYA3_LEIMU | Heat shock protein 70-related protein OS=Leishr     | 11 |
| 1.203497554 | -0.4392 | E9ALIO    | tr E9ALIO E9ALIO_LEIMU | Phosphodiesterase OS=Leishmania mexicana (stra      | 2  |
| 2.110721198 | -0.4399 | E9ATX3    | tr E9ATX3 E9ATX3_LEIMU | Putative NADH dehydrogenase OS=Leishmania n         | 8  |
| 1.918672914 | -0.4403 | E9ATU8    | tr E9ATU8 E9ATU8_LEIMU | Uncharacterized protein OS=Leishmania mexica        | 2  |
| 2.217863972 | -0.4407 | E9ARW1    | tr E9ARW1 E9ARW1_LEIMU | Putative fibrillarin OS=Leishmania mexicana (s      | 5  |
| 2.392084199 | -0.4407 | E9AZE9    | tr E9AZE9 E9AZE9_LEIMU | Putative heat shock protein DNAJ OS=Leishmani       | 7  |
| 1.78843203  | -0.4412 | E8NHG6;E8 | tr E8NHG6 E8NHG6_LEIMU | Uncharacterized protein LmxM_30_0440_1 OS           | 14 |
| 1.698365288 | -0.4414 | E9ALH0    | tr E9ALH0 E9ALH0_LEIMU | Uncharacterized protein OS=Leishmania mexica        | 2  |
| 1.729939874 | -0.442  | E9AUC7    | tr E9AUC7 E9AUC7_LEIMU | Putative T-complex protein 1, theta subunit OS=     | 8  |
| 2.264306637 | -0.4428 | E9B1C6    | tr E9B1C6 E9B1C6_LEIMU | S-adenosylmethionine synthase OS=Leishmania         | 9  |
| 1.820190241 | -0.4428 | E9AQ77    | tr E9AQ77 E9AQ77_LEIMU | Uncharacterized protein OS=Leishmania mexica        | 3  |
| 2.588998072 | -0.4452 | E9B5D2    | tr E9B5D2 E9B5D2_LEIMU | Cleavage and polyadenylation specificity factor,    | 2  |
| 2.221899377 | -0.4455 | E9AQA3    | tr E9AQA3 E9AQA3_LEIMU | Tryparedoxin peroxidase OS=Leishmania mexic         | 2  |
| 1.368315708 | -0.446  | E9ATR2    | tr E9ATR2 E9ATR2_LEIMU | Uncharacterized protein OS=Leishmania mexica        | 2  |
| 1.957812016 | -0.446  | E9ANP4    | tr E9ANP4 E9ANP4_LEIMU | Pyruvate, phosphate dikinase OS=Leishmania m        | 24 |
| 2.701480672 | -0.4461 | E9AQS3    | tr E9AQS3 E9AQS3_LEIMU | Tyrosyl or methionyl-tRNA synthetase-like prote     | 3  |
| 2.012227369 | -0.4467 | E9ANQ5    | tr E9ANQ5 E9ANQ5_LEIMU | Uncharacterized protein OS=Leishmania mexic         | 4  |
| 1.989886349 | -0.447  | E9AKB8    | tr E9AKB8 E9AKB8_LEIMU | Putative nucleolar RNA helicase II OS=Leishmani     | 9  |
| 1.668500129 | -0.4473 | E9AQ03    | tr E9AQ03 E9AQ03_LEIMU | Uncharacterized protein OS=Leishmania mexica        | 2  |
| 2.187068835 | -0.4487 | E9AN73    | tr E9AN73 E9AN73_LEIMU | Flagellar glycoprotein-like protein OS=Leishman     | 2  |
| 1.466267042 | -0.4489 | E9B163    | tr E9B163 E9B163_LEIMU | Putative aldehyde dehydrogenase OS=Leishmani        | 2  |
| 2.130701837 | -0.4492 | E9AX53    | tr E9AX53 E9AX53_LEIMU | 40S ribosomal protein S8 OS=Leishmania mexica       | 4  |
| 1.682874962 | -0.4496 | Q2TUW2;E  | tr Q2TUW2 Q2TUW2_LEIAM | Inosine-5-monophosphate dehydrogenase OS            | 4  |

|             |         |             |                        |                                                                   |    |
|-------------|---------|-------------|------------------------|-------------------------------------------------------------------|----|
| 1.999049372 | -0.45   | E9ATU4      | tr E9ATU4 E9ATU4_LEIMU | Uncharacterized protein OS=Leishmania mexicana                    | 12 |
| 1.964436622 | -0.4503 | E9B6K5      | tr E9B6K5 E9B6K5_LEIMU | Uncharacterized protein OS=Leishmania mexicana                    | 2  |
| 1.680750804 | -0.4508 | E9B0H0      | tr E9B0H0 E9B0H0_LEIMU | Eukaryotic translation initiation factor 4e,putative              | 2  |
| 1.905752562 | -0.451  | E9AU22      | tr E9AU22 E9AU22_LEIMU | Uncharacterized protein OS=Leishmania mexicana                    | 6  |
| 2.266006879 | -0.4512 | E9AUD5      | tr E9AUD5 E9AUD5_LEIMU | Putative eukaryotic translation initiation factor                 | 15 |
| 1.931200101 | -0.4518 | E9ANA0      | tr E9ANA0 E9ANA0_LEIMU | Uncharacterized protein OS=Leishmania mexicana                    | 2  |
| 2.087406424 | -0.4522 | E9AT85      | tr E9AT85 E9AT85_LEIMU | Fibrillarin OS=Leishmania mexicana (strain MHO)                   | 3  |
| 1.891540473 | -0.4524 | E9ASC2      | tr E9ASC2 E9ASC2_LEIMU | Putative PUF1 OS=Leishmania mexicana (strain MHO)                 | 3  |
| 2.013892852 | -0.453  | E9ALH3      | tr E9ALH3 E9ALH3_LEIMU | ATP-dependent 6-phosphofructokinase OS=Leishmania mexicana        | 6  |
| 2.407981893 | -0.4549 | E9APT8      | tr E9APT8 E9APT8_LEIMU | Putative immunodominant antigen (Tc40 antigen)                    | 6  |
| 1.959697779 | -0.4554 | Q95NJ3;E8tr | Q95NJ3 Q95NJ3_LEIAM    | Activated C kinase protein OS=Leishmania amazonensis              | 10 |
| 2.340272519 | -0.4554 | E9B178      | tr E9B178 E9B178_LEIMU | Eukaryotic translation initiation factor 3 subunit                | 3  |
| 2.1435827   | -0.4565 | E9B3L2;P2tr | E9B3L2 E9B3L2_LEIMU    | Heat shock protein 83-1 OS=Leishmania mexicana                    | 32 |
| 1.976592231 | -0.4565 | E9B474;E9tr | E9B474 E9B474_LEIMU    | Uncharacterized protein OS=Leishmania mexicana                    | 2  |
| 1.702866967 | -0.4567 | E9AV88      | tr E9AV88 E9AV88_LEIMU | Putative kinesin OS=Leishmania mexicana (strain MHO)              | 2  |
| 1.99323355  | -0.4573 | E9AS32      | tr E9AS32 E9AS32_LEIMU | Putative ABC transporter OS=Leishmania mexicana                   | 4  |
| 2.296517644 | -0.4578 | E9B4K3      | tr E9B4K3 E9B4K3_LEIMU | Eukaryotic translation initiation factor 5,putative               | 4  |
| 2.044453967 | -0.4588 | E9B492      | tr E9B492 E9B492_LEIMU | Uncharacterized protein OS=Leishmania mexicana                    | 4  |
| 2.038054041 | -0.4589 | E9AZ37      | tr E9AZ37 E9AZ37_LEIMU | Putative arginyl-tRNA synthetase OS=Leishmania mexicana           | 16 |
| 2.155037347 | -0.4589 | E9AKB4      | tr E9AKB4 E9AKB4_LEIMU | Serine/threonine-protein phosphatase OS=Leishmania mexicana       | 5  |
| 1.96887799  | -0.4591 | E9B544      | tr E9B544 E9B544_LEIMU | Uncharacterized protein OS=Leishmania mexicana                    | 2  |
| 2.209220126 | -0.4594 | E9B699      | tr E9B699 E9B699_LEIMU | Putative RNA-binding protein OS=Leishmania mexicana               | 6  |
| 2.223853809 | -0.4601 | E9ARK6;E9tr | E9ARK6 E9ARK6_LEIMU    | Citrate synthase OS=Leishmania mexicana (strain MHO)              | 8  |
| 1.73713183  | -0.4616 | E9B5Y1      | tr E9B5Y1 E9B5Y1_LEIMU | Putative casein kinase OS=Leishmania mexicana                     | 3  |
| 2.466055516 | -0.4618 | E9AUS4      | tr E9AUS4 E9AUS4_LEIMU | Coatomer subunit beta OS=Leishmania mexicana                      | 9  |
| 2.161893223 | -0.4632 | E9ALR5      | tr E9ALR5 E9ALR5_LEIMU | Uncharacterized protein OS=Leishmania mexicana                    | 2  |
| 1.679563477 | -0.4637 | E9AN72      | tr E9AN72 E9AN72_LEIMU | Uncharacterized protein OS=Leishmania mexicana                    | 2  |
| 1.533900136 | -0.4637 | E9AM65      | tr E9AM65 E9AM65_LEIMU | DNA-directed RNA polymerase I-like protein OS=Leishmania mexicana | 2  |
| 1.699218057 | -0.4641 | E9AR96      | tr E9AR96 E9AR96_LEIMU | Uncharacterized protein OS=Leishmania mexicana                    | 3  |
| 1.601873126 | -0.4641 | E9AJW0;E9tr | E9AJW0 E9AJW0_LEIMU    | Uncharacterized protein OS=Leishmania mexicana                    | 3  |
| 1.30663076  | -0.4646 | E9ARB0      | tr E9ARB0 E9ARB0_LEIMU | Protein SDA1 OS=Leishmania mexicana (strain MHO)                  | 3  |
| 2.247077379 | -0.4662 | E9ALV7      | tr E9ALV7 E9ALV7_LEIMU | Tryparedoxin OS=Leishmania mexicana (strain MHO)                  | 3  |
| 1.642346789 | -0.4662 | E9AUZ2;Q4tr | E9AUZ2 E9AUZ2_LEIMU    | Phosphotransferase OS=Leishmania mexicana (strain MHO)            | 13 |
| 1.525915639 | -0.4663 | E9AZQ1      | tr E9AZQ1 E9AZQ1_LEIMU | DNA helicase OS=Leishmania mexicana (strain MHO)                  | 2  |
| 1.776451006 | -0.4664 | E9ASM7      | tr E9ASM7 E9ASM7_LEIMU | Putative ribosomal protein L24 OS=Leishmania mexicana             | 4  |
| 2.261220414 | -0.4671 | E9AV93      | tr E9AV93 E9AV93_LEIMU | T-complex protein 1 subunit delta OS=Leishmania mexicana          | 13 |
| 1.830831313 | -0.4674 | E9B4Q3;E9tr | E9B4Q3 E9B4Q3_LEIMU    | Elongation factor 1-beta OS=Leishmania mexicana                   | 3  |
| 1.388738679 | -0.4682 | E9AV20      | tr E9AV20 E9AV20_LEIMU | Uncharacterized protein OS=Leishmania mexicana                    | 2  |
| 2.00470166  | -0.4688 | E9AZ83;E9tr | E9AZ83 E9AZ83_LEIMU    | Glycosomal phosphoenolpyruvate carboxykinase                      | 10 |
| 1.863807148 | -0.4694 | E9AQ94      | tr E9AQ94 E9AQ94_LEIMU | Putative 40S ribosomal protein S3 OS=Leishmania mexicana          | 8  |
| 2.530691614 | -0.47   | E9ANY1;P4tr | E9ANY1 E9ANY1_LEIMU    | Glucose-6-phosphate isomerase OS=Leishmania mexicana              | 3  |
| 2.332902829 | -0.4703 | E9AJC9      | tr E9AJC9 E9AJC9_LEIMU | 40S ribosomal protein S7 OS=Leishmania mexicana                   | 7  |
| 1.846696818 | -0.4706 | E9ANQ6      | tr E9ANQ6 E9ANQ6_LEIMU | Putative eukaryotic release factor 3 OS=Leishmania mexicana       | 6  |
| 2.103536869 | -0.4709 | E9AYX8;E9tr | E9AYX8 E9AYX8_LEIMU    | Putative small GTP-binding protein Rab1 OS=Leishmania mexicana    | 7  |
| 1.963434616 | -0.4713 | E9B258      | tr E9B258 E9B258_LEIMU | Uncharacterized protein OS=Leishmania mexicana                    | 2  |
| 1.952709983 | -0.4714 | E9B1K6      | tr E9B1K6 E9B1K6_LEIMU | Mevalonate kinase OS=Leishmania mexicana (strain MHO)             | 3  |
| 2.005169465 | -0.4719 | E9AM37      | tr E9AM37 E9AM37_LEIMU | Uncharacterized protein OS=Leishmania mexicana                    | 2  |
| 2.831819408 | -0.4739 | E9AMU6      | tr E9AMU6 E9AMU6_LEIMU | Uncharacterized protein OS=Leishmania mexicana                    | 2  |
| 1.987487643 | -0.4742 | E9AS17      | tr E9AS17 E9AS17_LEIMU | Uncharacterized protein OS=Leishmania mexicana                    | 5  |
| 2.144273486 | -0.4742 | E9B4G7      | tr E9B4G7 E9B4G7_LEIMU | Uncharacterized protein OS=Leishmania mexicana                    | 10 |
| 2.129645918 | -0.4756 | E9AMV9;E9tr | E9AMV9 E9AMV9_LEIMU    | Putative eukaryotic translation initiation factor                 | 10 |
| 2.247387511 | -0.4761 | E9AYH6      | tr E9AYH6 E9AYH6_LEIMU | Uncharacterized protein OS=Leishmania mexicana                    | 20 |
| 2.228282427 | -0.4785 | E9AP13      | tr E9AP13 E9AP13_LEIMU | NADH:flavin oxidoreductase/NADH oxidase,putative                  | 3  |
| 1.931117212 | -0.4788 | E9B3H7      | tr E9B3H7 E9B3H7_LEIMU | Putative GIPL gal transferase OS=Leishmania mexicana              | 2  |
| 2.124537101 | -0.479  | E9B384      | tr E9B384 E9B384_LEIMU | Uncharacterized protein OS=Leishmania mexicana                    | 15 |
| 2.076635889 | -0.4805 | E9B5R2      | tr E9B5R2 E9B5R2_LEIMU | 60S ribosomal protein L30 OS=Leishmania mexicana                  | 4  |
| 1.860908777 | -0.4814 | E9AXE4      | tr E9AXE4 E9AXE4_LEIMU | Putative epsin OS=Leishmania mexicana (strain MHO)                | 2  |

|             |         |           |                        |                                                   |    |
|-------------|---------|-----------|------------------------|---------------------------------------------------|----|
| 2.476046265 | -0.482  | W6A238;E  | tr W6A238 W6A238_LEIME | Elongation factor 1-alpha (Fragment) OS=Leish     | 20 |
| 2.047673584 | -0.4822 | E9ARI8    | tr E9ARI8 E9ARI8_LEIMU | Aconitate hydratase OS=Leishmania mexicana (st    | 13 |
| 2.633877882 | -0.4835 | E9B1B3    | tr E9B1B3 E9B1B3_LEIMU | Phosphoglycerate kinase OS=Leishmania mexica      | 3  |
| 2.293190128 | -0.484  | E9AT73    | tr E9AT73 E9AT73_LEIMU | Succinate--CoA ligase [ADP-forming] subunit bet   | 13 |
| 1.970324929 | -0.4853 | E9AZX3    | tr E9AZX3 E9AZX3_LEIMU | Putative DEAD box RNA helicase OS=Leishmania      | 5  |
| 2.463736519 | -0.4858 | E9AV28    | tr E9AV28 E9AV28_LEIMU | Putative RNA helicase OS=Leishmania mexicana      | 5  |
| 2.036853763 | -0.4872 | E9B1G4    | tr E9B1G4 E9B1G4_LEIMU | DNA-directed RNA polymerase subunit beta OS-      | 5  |
| 1.776317052 | -0.4879 | E9B423    | tr E9B423 E9B423_LEIMU | Nucleolar GTP-binding protein 1 OS=Leishmania     | 6  |
| 1.914971276 | -0.488  | E9B3U9    | tr E9B3U9 E9B3U9_LEIMU | Putative pumilio protein OS=Leishmania mexica     | 3  |
| 2.212540456 | -0.4886 | E9B193    | tr E9B193 E9B193_LEIMU | 3-hydroxy-3-methylglutaryl coenzyme A reducta     | 4  |
| 2.262235372 | -0.4897 | E9AQA0    | tr E9AQA0 E9AQA0_LEIMU | NAD-specific glutamate dehydrogenase OS=Lei       | 23 |
| 1.834883151 | -0.4907 | E9B0K3    | tr E9B0K3 E9B0K3_LEIMU | Uncharacterized protein OS=Leishmania mexicar     | 4  |
| 2.620033107 | -0.4909 | E9AT99    | tr E9AT99 E9AT99_LEIMU | 14-3-3 protein-like protein OS=Leishmania mexic   | 2  |
| 1.709667122 | -0.491  | E9AZV5    | tr E9AZV5 E9AZV5_LEIMU | Haloacid dehalogenase-like hydrolase-like prote   | 2  |
| 2.276528537 | -0.4918 | E9AST4    | tr E9AST4 E9AST4_LEIMU | Clathrin heavy chain OS=Leishmania mexicana (s    | 35 |
| 1.762578368 | -0.4918 | E9B215    | tr E9B215 E9B215_LEIMU | Prostaglandin f2-alpha synthase OS=Leishmania     | 3  |
| 1.877062464 | -0.492  | E9AV21    | tr E9AV21 E9AV21_LEIMU | Putative la RNA binding protein OS=Leishmania     | 2  |
| 2.037865943 | -0.4922 | E9AMW3    | tr E9AMW3 E9AMW3_LEIMU | Mitochondrial RNA binding protein 2 OS=Leis       | 2  |
| 2.233995652 | -0.4922 | E9B494    | tr E9B494 E9B494_LEIMU | Isocitrate dehydrogenase [NADP] OS=Leishmani      | 3  |
| 2.160781169 | -0.4924 | E9AP62;E8 | tr E9AP62 E9AP62_LEIMU | Tubulin alpha chain OS=Leishmania mexicana (st    | 18 |
| 1.964146752 | -0.4927 | E9B6F3    | tr E9B6F3 E9B6F3_LEIMU | Galactokinase-like protein OS=Leishmania mexic    | 3  |
| 2.18818493  | -0.4931 | E9ARA1    | tr E9ARA1 E9ARA1_LEIMU | Putative translation initiation factor OS=Leishm  | 11 |
| 3.316516831 | -0.4935 | E9B1T6    | tr E9B1T6 E9B1T6_LEIMU | Uncharacterized protein OS=Leishmania mexicar     | 4  |
| 2.239750078 | -0.494  | E9AX88    | tr E9AX88 E9AX88_LEIMU | Putative electron transfer flavoprotein OS=Leish  | 5  |
| 2.312056136 | -0.4947 | E9AZE0    | tr E9AZE0 E9AZE0_LEIMU | Obg-like ATPase 1 OS=Leishmania mexicana (stra    | 3  |
| 2.049587323 | -0.4951 | E9B297    | tr E9B297 E9B297_LEIMU | Putative acetyl-CoA carboxylase OS=Leishmania     | 36 |
| 1.458304005 | -0.4952 | E9AXC0    | tr E9AXC0 E9AXC0_LEIMU | Uncharacterized protein OS=Leishmania mexica      | 2  |
| 1.824894004 | -0.4952 | Q9NGJ9;O  | tr Q9NGJ9 Q9NGJ9_LEIAM | Ribonucleotide reductase small subunit M2 OS-     | 2  |
| 1.658003892 | -0.4952 | E9AVH3    | tr E9AVH3 E9AVH3_LEIMU | Putative ATP synthase F1 subunit gamma prote      | 4  |
| 3.032507542 | -0.496  | E9ALK4    | tr E9ALK4 E9ALK4_LEIMU | Uncharacterized protein OS=Leishmania mexicar     | 5  |
| 2.800176269 | -0.4962 | E9AY75    | tr E9AY75 E9AY75_LEIMU | 60S ribosomal export protein NMD3 OS=Leishm       | 5  |
| 2.430941868 | -0.4962 | Q9BLW4;E  | tr Q9BLW4 Q9BLW4_LEIME | GDP-mannose pyrophosphorylase OS=Leishma          | 2  |
| 2.02753642  | -0.4967 | E9AUQ7;E  | tr E9AUQ7 E9AUQ7_LEIMU | Calpain-like cysteine peptidase OS=Leishmania     | 5  |
| 2.255609432 | -0.4971 | E9AN04    | tr E9AN04 E9AN04_LEIMU | Uncharacterized protein OS=Leishmania mexica      | 5  |
| 1.969101954 | -0.498  | E9ASG1    | tr E9ASG1 E9ASG1_LEIMU | Uncharacterized protein OS=Leishmania mexica      | 3  |
| 2.043521532 | -0.4981 | E9AR24    | tr E9AR24 E9AR24_LEIMU | Putative RNA-binding protein OS=Leishmania m      | 3  |
| 2.531439631 | -0.4981 | E9AZA6    | tr E9AZA6 E9AZA6_LEIMU | D-lactate dehydrogenase-like protein OS=Leishn    | 4  |
| 1.814635672 | -0.4989 | E9AVW4    | tr E9AVW4 E9AVW4_LEIMU | Uncharacterized protein OS=Leishmania mexic       | 4  |
| 2.12932197  | -0.4994 | E9AVR1    | tr E9AVR1 E9AVR1_LEIMU | Putative NADH-cytochrome b5 reductase OS=Le       | 3  |
| 2.44133857  | -0.4996 | E9AQY9    | tr E9AQY9 E9AQY9_LEIMU | Putative peptidase t (Peptidase t, putative, met  | 7  |
| 2.290867239 | -0.4998 | Q86PL4;E9 | tr Q86PL4 Q86PL4_LEIME | Paraflagellar rod protein 1D OS=Leishmania mex    | 15 |
| 2.227762844 | -0.5001 | E9B3W9    | tr E9B3W9 E9B3W9_LEIMU | Cysteine conjugate beta-lyase,aminotransferas     | 3  |
| 1.860647421 | -0.5017 | E9B007    | tr E9B007 E9B007_LEIMU | Uncharacterized protein OS=Leishmania mexicar     | 4  |
| 2.235649985 | -0.5028 | E9AMU9    | tr E9AMU9 E9AMU9_LEIMU | Elongation factor-1 gamma OS=Leishmania m         | 7  |
| 2.461380759 | -0.5029 | E9ASR3    | tr E9ASR3 E9ASR3_LEIMU | Putative translation elongation factor 1-beta OS- | 4  |
| 2.134949711 | -0.5047 | E9B6R4    | tr E9B6R4 E9B6R4_LEIMU | T-complex protein 1 subunit eta OS=Leishmania     | 10 |
| 1.754151643 | -0.5051 | E9B5P3    | tr E9B5P3 E9B5P3_LEIMU | Putative 2-oxoisovalerate dehydrogenase beta s    | 2  |
| 2.322345937 | -0.5056 | E9ASD6    | tr E9ASD6 E9ASD6_LEIMU | Elongation factor 2 OS=Leishmania mexicana (st    | 27 |
| 2.330591046 | -0.5058 | E9AMV3    | tr E9AMV3 E9AMV3_LEIMU | Uncharacterized protein OS=Leishmania mexic       | 11 |
| 2.2039599   | -0.5061 | E9AV90;Q  | tr E9AV90 E9AV90_LEIMU | Putative 40S ribosomal protein S23 OS=Leishma     | 2  |
| 2.553642915 | -0.5065 | Q8I911;E9 | tr Q8I911 Q8I911_LEIAM | Glucose-6-phosphate 1-dehydrogenase OS=Leish      | 2  |
| 1.89430832  | -0.5071 | E9B5M6    | tr E9B5M6 E9B5M6_LEIMU | Coatomer subunit alpha OS=Leishmania mexic        | 11 |
| 2.166161316 | -0.5142 | E9B578;E9 | tr E9B578 E9B578_LEIMU | Putative ribosomal protein L3 OS=Leishmania m     | 11 |
| 2.070776165 | -0.5147 | E9ANI6    | tr E9ANI6 E9ANI6_LEIMU | Tubulin-tyrsoine ligase-like protein OS=Leishman  | 4  |
| 2.428978349 | -0.515  | E9AYS6    | tr E9AYS6 E9AYS6_LEIMU | Kinetoplast-associated protein-like protein OS=L  | 2  |
| 1.937011002 | -0.5166 | E9B5Z7;E9 | tr E9B5Z7 E9B5Z7_LEIMU | Putative NADH-dependent fumarate reductase C      | 18 |
| 2.310477749 | -0.5173 | E9AJD9;E9 | tr E9AJD9 E9AJD9_LEIMU | Putative long-chain-fatty-acid-CoA ligase OS=Leis | 4  |



|             |         |           |                          |                                                   |    |
|-------------|---------|-----------|--------------------------|---------------------------------------------------|----|
| 2.411264447 | -0.5174 | E9AJJ4    | tr E9AJJ4 E9AJJ4_LEIMU   | Uncharacterized protein OS=Leishmania mexicana    | 7  |
| 2.277228256 | -0.5176 | E9B573    | tr E9B573 E9B573_LEIMU   | Regulatory subunit of protein kinase a-like prote | 12 |
| 2.15944296  | -0.5177 | Q25327;E9 | tr Q25327 Q25327_LEIME   | Membrane-bound acid phosphatase OS=Leishm         | 3  |
| 1.588160005 | -0.518  | E9B511    | tr E9B511 E9B511_LEIMU   | Putative dynein heavy chain OS=Leishmania mexi    | 5  |
| 1.945805921 | -0.5195 | E9B1L9    | tr E9B1L9 E9B1L9_LEIMU   | Uncharacterized protein OS=Leishmania mexican     | 3  |
| 2.350152326 | -0.5211 | E9AXX5    | tr E9AXX5 E9AXX5_LEIMU   | Uncharacterized protein OS=Leishmania mexica      | 8  |
| 1.563188721 | -0.5242 | E9B2J9    | tr E9B2J9 E9B2J9_LEIMU   | Putative RNA binding protein OS=Leishmania me>    | 3  |
| 2.435432666 | -0.5248 | E9B638    | tr E9B638 E9B638_LEIMU   | Uncharacterized protein OS=Leishmania mexicar     | 2  |
| 1.821574683 | -0.5248 | E9B5S5    | tr E9B5S5 E9B5S5_LEIMU   | Putative ATP-dependent DEAD-box RNA helicase      | 8  |
| 2.686448563 | -0.5278 | E9AL95    | tr E9AL95 E9AL95_LEIMU   | Flavoprotein subunit-like protein OS=Leishmania   | 2  |
| 2.123334266 | -0.5281 | E9ANJ4    | tr E9ANJ4 E9ANJ4_LEIMU   | Uncharacterized protein OS=Leishmania mexicar     | 3  |
| 2.761960008 | -0.5293 | E9AL83    | tr E9AL83 E9AL83_LEIMU   | Topoisomerase-related function protein-like proi  | 2  |
| 2.213187142 | -0.5305 | E9AW86;E9 | tr E9AW86 E9AW86_LEIMU   | Acetyl-coenzyme A synthetase OS=Leishmania        | 9  |
| 1.64336472  | -0.5308 | E9AZN4    | tr E9AZN4 E9AZN4_LEIMU   | Uncharacterized protein OS=Leishmania mexica      | 3  |
| 2.145343857 | -0.5317 | E9AQM8    | tr E9AQM8 E9AQM8_LEIMU   | Uncharacterized protein OS=Leishmania mexi        | 3  |
| 3.022342787 | -0.5343 | E9ALD8;E9 | tr E9ALD8 E9ALD8_LEIMU   | 40S ribosomal protein S19-like protein OS=Leish   | 2  |
| 1.846561866 | -0.5344 | E9B0C5    | tr E9B0C5 E9B0C5_LEIMU   | Uncharacterized protein LMXM_28_3030 OS=Le        | 2  |
| 1.93180057  | -0.5345 | E9AP69    | tr E9AP69 E9AP69_LEIMU   | Uncharacterized protein OS=Leishmania mexica      | 6  |
| 2.295594214 | -0.5366 | E9AUZ5    | tr E9AUZ5 E9AUZ5_LEIMU   | Uncharacterized protein OS=Leishmania mexica      | 2  |
| 2.010000105 | -0.5366 | E9B5Y8    | tr E9B5Y8 E9B5Y8_LEIMU   | Uncharacterized protein OS=Leishmania mexicar     | 3  |
| 1.73409018  | -0.5375 | E9ARW5    | tr E9ARW5 E9ARW5_LEIMU   | Uncharacterized protein OS=Leishmania mexic       | 3  |
| 1.55952177  | -0.5381 | E9ARX0    | tr E9ARX0 E9ARX0_LEIMU   | Uncharacterized protein OS=Leishmania mexica      | 2  |
| 2.633686486 | -0.5392 | E9AVQ7    | tr E9AVQ7 E9AVQ7_LEIMU   | Uncharacterized protein OS=Leishmania mexica      | 11 |
| 2.202272878 | -0.5392 | E9AM00    | tr E9AM00 E9AM00_LEIMU   | Putative U-box domain protein OS=Leishmania       | 2  |
| 2.107992159 | -0.5398 | Q8MPPM3;I | tr Q8MPPM3 Q8MPPM3_LEIME | Transketolase OS=Leishmania mexicana mex          | 5  |
| 2.471528628 | -0.5398 | E9B3G8    | tr E9B3G8 E9B3G8_LEIMU   | Putative 60S ribosomal protein L2 OS=Leishman     | 3  |
| 2.480940049 | -0.5415 | E9B520    | tr E9B520 E9B520_LEIMU   | Putative asparaginyl-tRNA synthetase OS=Leishn    | 5  |
| 2.671845993 | -0.5437 | E9B001;Q5 | tr E9B001 E9B001_LEIMU   | Replication protein A subunit OS=Leishmania me    | 5  |
| 3.137654551 | -0.544  | E9AX57    | tr E9AX57 E9AX57_LEIMU   | Uncharacterized protein OS=Leishmania mexica      | 2  |
| 1.963091246 | -0.5444 | E9AQ78    | tr E9AQ78 E9AQ78_LEIMU   | Peroxisomal membrane protein PEX16 OS=Leish       | 2  |
| 1.845409075 | -0.5459 | E9ARW7    | tr E9ARW7 E9ARW7_LEIMU   | Putative aminopeptidase OS=Leishmania mexi        | 3  |
| 2.051448301 | -0.5463 | E9AS66    | tr E9AS66 E9AS66_LEIMU   | Uncharacterized protein OS=Leishmania mexicar     | 3  |
| 2.35963711  | -0.5468 | E9B2G1    | tr E9B2G1 E9B2G1_LEIMU   | Putative ATP-dependent RNA helicase OS=Leish      | 20 |
| 2.256244261 | -0.5479 | E9AKX3    | tr E9AKX3 E9AKX3_LEIMU   | Putative glucosamine-fructose-6-phosphate ami     | 3  |
| 1.901028694 | -0.5497 | E9AZK8    | tr E9AZK8 E9AZK8_LEIMU   | Carbonic anhydrase-like protein OS=Leishmania     | 2  |
| 1.726491419 | -0.5516 | E9B6T5    | tr E9B6T5 E9B6T5_LEIMU   | Uncharacterized protein OS=Leishmania mexicar     | 2  |
| 2.558114035 | -0.5517 | E9B3C2    | tr E9B3C2 E9B3C2_LEIMU   | Uncharacterized protein OS=Leishmania mexica      | 2  |
| 2.20409899  | -0.5521 | E9B4J8    | tr E9B4J8 E9B4J8_LEIMU   | Uncharacterized protein OS=Leishmania mexican     | 5  |
| 2.321027105 | -0.5559 | E9AQL3;Q5 | tr E9AQL3 E9AQL3_LEIMU   | Putative orotidine-5-phosphate decarboxylase/(    | 16 |
| 1.744022443 | -0.5564 | E9AXG9    | tr E9AXG9 E9AXG9_LEIMU   | Peptidyl-prolyl cis-trans isomerase OS=Leishma    | 6  |
| 2.913780804 | -0.5572 | E9B5X7;E9 | tr E9B5X7 E9B5X7_LEIMU   | Putative aldose 1-epimerase OS=Leishmania me;     | 2  |
| 1.98330424  | -0.5574 | E9AXU0    | tr E9AXU0 E9AXU0_LEIMU   | Elongation factor 2-like protein OS=Leishmania    | 2  |
| 2.443076837 | -0.5598 | E9ASP5;E9 | tr E9ASP5 E9ASP5_LEIMU   | Putative 40S ribosomal protein S9 OS=Leishmani    | 6  |
| 1.696596057 | -0.5604 | E9AJR6    | tr E9AJR6 E9AJR6_LEIMU   | Uncharacterized protein OS=Leishmania mexican     | 3  |
| 2.308591287 | -0.5636 | E9APE7;E9 | tr E9APE7 E9APE7_LEIMU   | 40S ribosomal protein S4 OS=Leishmania mexica     | 11 |
| 2.016828375 | -0.5652 | E9AKK2    | tr E9AKK2 E9AKK2_LEIMU   | Dipeptidyl peptidase 3 OS=Leishmania mexicana     | 3  |
| 2.240642273 | -0.5687 | E9B466    | tr E9B466 E9B466_LEIMU   | Uncharacterized protein OS=Leishmania mexicar     | 2  |
| 1.926148836 | -0.5706 | E9ASB9;E9 | tr E9ASB9 E9ASB9_LEIMU   | Histone H4 OS=Leishmania mexicana (strain MH      | 3  |
| 2.32866607  | -0.5711 | E9AZJ4    | tr E9AZJ4 E9AZJ4_LEIMU   | Putative rrp44p homologue OS=Leishmania mexic     | 2  |
| 2.374996131 | -0.5716 | E9AWU0    | tr E9AWU0 E9AWU0_LEIMU   | Putative replication factor C, subunit 1 OS=Lei   | 3  |
| 1.810645973 | -0.5741 | E9AUG6    | tr E9AUG6 E9AUG6_LEIMU   | Midasin OS=Leishmania mexicana (strain MHO        | 7  |
| 2.769189154 | -0.5748 | E9AY66;Q8 | tr E9AY66 E9AY66_LEIMU   | Putative 40S ribosomal protein S16 OS=Leishma     | 4  |
| 2.269540182 | -0.5764 | E9AMR1    | tr E9AMR1 E9AMR1_LEIMU   | Putative cyclin 1 OS=Leishmania mexicana (str.    | 3  |
| 1.79453863  | -0.5787 | E9B3L1    | tr E9B3L1 E9B3L1_LEIMU   | Putative ATP-binding cassette protein OS=Leishr   | 2  |
| 1.826839053 | -0.5806 | E9AWQ4    | tr E9AWQ4 E9AWQ4_LEIMU   | Kinesin-like protein OS=Leishmania mexicana       | 4  |
| 2.39283348  | -0.581  | E9B545    | tr E9B545 E9B545_LEIMU   | Uncharacterized protein OS=Leishmania mexicar     | 8  |
| 2.268127118 | -0.583  | E9AVH4    | tr E9AVH4 E9AVH4_LEIMU   | 40S ribosomal protein S6 OS=Leishmania mexic      | 3  |

|                             |                         |                           |                                        |                                                                                   |                    |
|-----------------------------|-------------------------|---------------------------|----------------------------------------|-----------------------------------------------------------------------------------|--------------------|
| 2.674957419                 | -0.5841                 | E9B4N8                    | tr E9B4N8 E9B4N8_LEIMU                 | Uncharacterized protein OS=Leishmania mexicana                                    | 4                  |
| 2.316396299                 | -0.5847                 | E9B700                    | tr E9B700 E9B700_LEIMU                 | Uncharacterized protein OS=Leishmania mexicana                                    | 9                  |
| <a href="#">2.8817374</a>   | <a href="#">-0.5883</a> | <a href="#">E9AZH2</a>    | <a href="#">tr E9AZH2 E9AZH2_LEIMU</a> | <a href="#">Proteasome subunit beta OS=Leishmania mexicana</a>                    | <a href="#">2</a>  |
| 2.512802479                 | -0.591                  | E9AR70                    | tr E9AR70 E9AR70_LEIMU                 | Uncharacterized protein OS=Leishmania mexicana                                    | 2                  |
| 2.747267103                 | -0.5945                 | E9AQU5                    | tr E9AQU5 E9AQU5_LEIMU                 | Uncharacterized protein OS=Leishmania mexicana                                    | 2                  |
| <a href="#">2.426579341</a> | <a href="#">-0.5954</a> | <a href="#">E9AV89</a>    | <a href="#">tr E9AV89 E9AV89_LEIMU</a> | <a href="#">Putative 60S ribosomal protein L9 OS=Leishmania mexicana</a>          | <a href="#">8</a>  |
| 2.676830399                 | -0.5963                 | E9AMM1                    | tr E9AMM1 E9AMM1_LEIMU                 | Uncharacterized protein OS=Leishmania mexicana                                    | 2                  |
| 2.312373413                 | -0.6029                 | E9B4X4                    | tr E9B4X4 E9B4X4_LEIMU                 | Uncharacterized protein OS=Leishmania mexicana                                    | 2                  |
| 1.798888126                 | -0.603                  | E9AYA4                    | tr E9AYA4 E9AYA4_LEIMU                 | Uncharacterized protein OS=Leishmania mexicana                                    | 2                  |
| 2.656122977                 | -0.6046                 | E9AKP0                    | tr E9AKP0 E9AKP0_LEIMU                 | Peptidyl-prolyl cis-trans isomerase OS=Leishmania mexicana                        | 2                  |
| 2.271558915                 | -0.6154                 | E9AQE5;E9                 | tr E9AQE5 E9AQE5_LEIMU                 | Phosphodiesterase OS=Leishmania mexicana (si                                      | 10                 |
| 1.923715346                 | -0.6159                 | E9AK98                    | tr E9AK98 E9AK98_LEIMU                 | Putative RNA-binding protein OS=Leishmania mexicana                               | 4                  |
| 2.396942366                 | -0.6174                 | E9AK64                    | tr E9AK64 E9AK64_LEIMU                 | Pescadillo homolog OS=Leishmania mexicana (st                                     | 4                  |
| <a href="#">2.536082083</a> | <a href="#">-0.619</a>  | <a href="#">E9AZL5</a>    | <a href="#">tr E9AZL5 E9AZL5_LEIMU</a> | <a href="#">40S ribosomal protein S26 OS=Leishmania mexicana</a>                  | <a href="#">2</a>  |
| 2.15966167                  | -0.6214                 | E9ARS2                    | tr E9ARS2 E9ARS2_LEIMU                 | Putative pyruvate dehydrogenase E1 component                                      | 4                  |
| <a href="#">2.655887816</a> | <a href="#">-0.6216</a> | <a href="#">E9AQK4</a>    | <a href="#">tr E9AQK4 E9AQK4_LEIMU</a> | <a href="#">Putative 60S ribosomal protein L21 OS=Leishmania mexicana</a>         | <a href="#">4</a>  |
| 2.810070213                 | -0.6249                 | E9AYV1;E9                 | tr E9AYV1 E9AYV1_LEIMU                 | Putative calpain-like cysteine peptidase (Fragme                                  | 4                  |
| <a href="#">2.632820856</a> | <a href="#">-0.6252</a> | <a href="#">E9AK29</a>    | <a href="#">tr E9AK29 E9AK29_LEIMU</a> | <a href="#">60S ribosomal protein L11 (L5, L16) OS=Leishmania mexicana</a>        | <a href="#">6</a>  |
| 2.397180923                 | -0.6266                 | E9AZU1                    | tr E9AZU1 E9AZU1_LEIMU                 | Uncharacterized protein OS=Leishmania mexicana                                    | 2                  |
| 2.042329103                 | -0.6273                 | E9AN41                    | tr E9AN41 E9AN41_LEIMU                 | Protein transport protein SEC23 OS=Leishmania mexicana                            | 2                  |
| <a href="#">2.683062915</a> | <a href="#">-0.6291</a> | <a href="#">E9B350;E9</a> | <a href="#">tr E9B350 E9B350_LEIMU</a> | <a href="#">Putative ribosomal protein L27 OS=Leishmania mexicana</a>             | <a href="#">5</a>  |
| 2.244838157                 | -0.6348                 | E9ANK8                    | tr E9ANK8 E9ANK8_LEIMU                 | Putative aminopeptidase (Metallo-peptidase, cl                                    | 2                  |
| 2.694756695                 | -0.6363                 | E9AJQ8                    | tr E9AJQ8 E9AJQ8_LEIMU                 | Putative long chain fatty Acyl CoA synthetase OS                                  | 3                  |
| 1.832485833                 | -0.6371                 | E9AMS7                    | tr E9AMS7 E9AMS7_LEIMU                 | Uncharacterized protein OS=Leishmania mexicana                                    | 2                  |
| 2.104452134                 | -0.6373                 | E9AZX7                    | tr E9AZX7 E9AZX7_LEIMU                 | Putative hydrolase, alpha/beta fold family OS=Le                                  | 2                  |
| 3.065744437                 | -0.64                   | E9B722                    | tr E9B722 E9B722_LEIMU                 | Uncharacterized protein OS=Leishmania mexicana                                    | 2                  |
| <a href="#">2.088917307</a> | <a href="#">-0.6431</a> | <a href="#">E9AUU6</a>    | <a href="#">tr E9AUU6 E9AUU6_LEIMU</a> | <a href="#">Putative 40S ribosomal protein S11 OS=Leishmania mexicana</a>         | <a href="#">5</a>  |
| 2.764636548                 | -0.646                  | E9B547                    | tr E9B547 E9B547_LEIMU                 | Uncharacterized protein OS=Leishmania mexicana                                    | 5                  |
| 2.894539653                 | -0.6472                 | E9AVH2                    | tr E9AVH2 E9AVH2_LEIMU                 | Centromere/microtubule binding protein cbf5, r                                    | 4                  |
| 2.255832537                 | -0.6496                 | E9B483                    | tr E9B483 E9B483_LEIMU                 | Uncharacterized protein OS=Leishmania mexicana                                    | 5                  |
| <a href="#">2.604107604</a> | <a href="#">-0.6519</a> | <a href="#">E9ANP0</a>    | <a href="#">tr E9ANP0 E9ANP0_LEIMU</a> | <a href="#">40S ribosomal protein S5 OS=Leishmania mexicana</a>                   | <a href="#">2</a>  |
| 2.228104749                 | -0.6544                 | E9B1X5                    | tr E9B1X5 E9B1X5_LEIMU                 | Nucleosome assembly protein-like protein OS=Le                                    | 3                  |
| <a href="#">2.576865079</a> | <a href="#">-0.6558</a> | <a href="#">E9ARL1</a>    | <a href="#">tr E9ARL1 E9ARL1_LEIMU</a> | <a href="#">Putative elongation factor Tu OS=Leishmania mexicana</a>              | <a href="#">12</a> |
| 2.770320883                 | -0.6604                 | E9B183                    | tr E9B183 E9B183_LEIMU                 | Uncharacterized protein OS=Leishmania mexicana                                    | 2                  |
| <a href="#">2.639049249</a> | <a href="#">-0.6637</a> | <a href="#">E9AXZ8;E9</a> | <a href="#">tr E9AXZ8 E9AXZ8_LEIMU</a> | <a href="#">Putative 60S ribosomal protein L7 OS=Leishmania mexicana</a>          | <a href="#">6</a>  |
| 2.409655197                 | -0.6713                 | E9AQ75                    | tr E9AQ75 E9AQ75_LEIMU                 | Uncharacterized protein OS=Leishmania mexicana                                    | 2                  |
| 2.143752764                 | -0.6713                 | E9AUQ0                    | tr E9AUQ0 E9AUQ0_LEIMU                 | Uncharacterized protein OS=Leishmania mexicana                                    | 3                  |
| 3.589261353                 | -0.6745                 | E9AKN1;Q                  | tr E9AKN1 E9AKN1_LEIMU                 | Uncharacterized protein OS=Leishmania mexicana                                    | 4                  |
| 2.839542445                 | -0.6757                 | E9AU20                    | tr E9AU20 E9AU20_LEIMU                 | Uncharacterized protein OS=Leishmania mexicana                                    | 5                  |
| 2.412920123                 | -0.6779                 | E9AW79                    | tr E9AW79 E9AW79_LEIMU                 | Uncharacterized protein OS=Leishmania mexicana                                    | 2                  |
| <a href="#">2.968603918</a> | <a href="#">-0.6785</a> | <a href="#">E9B6K7</a>    | <a href="#">tr E9B6K7 E9B6K7_LEIMU</a> | <a href="#">Putative 60S ribosomal subunit protein L31 OS=Leishmania mexicana</a> | <a href="#">2</a>  |
| 2.237888504                 | -0.6787                 | E9AXM2                    | tr E9AXM2 E9AXM2_LEIMU                 | Uncharacterized protein OS=Leishmania mexicana                                    | 2                  |
| <a href="#">3.226201619</a> | <a href="#">-0.6788</a> | <a href="#">E9ATF7</a>    | <a href="#">tr E9ATF7 E9ATF7_LEIMU</a> | <a href="#">Putative 40S ribosomal protein S27-1 OS=Leishmania mexicana</a>       | <a href="#">3</a>  |
| 3.018653281                 | -0.684                  | E9AKC3                    | tr E9AKC3 E9AKC3_LEIMU                 | Uncharacterized protein OS=Leishmania mexicana                                    | 2                  |
| 2.739512058                 | -0.6849                 | E9B3B4                    | tr E9B3B4 E9B3B4_LEIMU                 | Dihydrolipoyl dehydrogenase OS=Leishmania mexicana                                | 4                  |
| 3.226097339                 | -0.6876                 | E9AMC1                    | tr E9AMC1 E9AMC1_LEIMU                 | Uncharacterized protein OS=Leishmania mexicana                                    | 2                  |
| <a href="#">4.149994056</a> | <a href="#">-0.6898</a> | <a href="#">E9ATA6</a>    | <a href="#">tr E9ATA6 E9ATA6_LEIMU</a> | <a href="#">Putative 60S ribosomal protein L22 OS=Leishmania mexicana</a>         | <a href="#">2</a>  |
| <a href="#">2.31575226</a>  | <a href="#">-0.6902</a> | <a href="#">E9ANHO</a>    | <a href="#">tr E9ANHO E9ANHO_LEIMU</a> | <a href="#">Proteasome subunit alpha type OS=Leishmania mexicana</a>              | <a href="#">2</a>  |
| <a href="#">3.010727622</a> | <a href="#">-0.6953</a> | <a href="#">E9ASL3</a>    | <a href="#">tr E9ASL3 E9ASL3_LEIMU</a> | <a href="#">Putative 40S ribosomal protein S18 OS=Leishmania mexicana</a>         | <a href="#">5</a>  |
| 2.981559008                 | -0.6988                 | E9APZ2                    | tr E9APZ2 E9APZ2_LEIMU                 | Uncharacterized protein OS=Leishmania mexicana                                    | 12                 |
| 3.077808522                 | -0.7004                 | E9ARG5                    | tr E9ARG5 E9ARG5_LEIMU                 | Uncharacterized protein OS=Leishmania mexicana                                    | 2                  |
| <a href="#">2.69540737</a>  | <a href="#">-0.708</a>  | <a href="#">E8NHIO</a>    | <a href="#">tr E8NHIO E8NHIO_LEIMU</a> | <a href="#">40S ribosomal protein S3a OS=Leishmania mexicana</a>                  | <a href="#">7</a>  |
| 1.968427351                 | -0.7094                 | Q9GU60;E                  | tr Q9GU60 Q9GU60_LEIAM                 | Kinetoplast membrane protein 11 OS=Leishmania mexicana                            | 2                  |
| 1.687094262                 | -0.7122                 | E9B303                    | tr E9B303 E9B303_LEIMU                 | Uncharacterized protein OS=Leishmania mexicana                                    | 2                  |
| <a href="#">3.208044268</a> | <a href="#">-0.718</a>  | <a href="#">E9B6Q4</a>    | <a href="#">tr E9B6Q4 E9B6Q4_LEIMU</a> | <a href="#">Putative 60S ribosomal protein L27A/L29 OS=Leishmania mexicana</a>    | <a href="#">3</a>  |
| <a href="#">2.963277625</a> | <a href="#">-0.7199</a> | <a href="#">E9B078</a>    | <a href="#">tr E9B078 E9B078_LEIMU</a> | <a href="#">Putative 40S ribosomal protein S17 OS=Leishmania mexicana</a>         | <a href="#">4</a>  |
| 2.763260098                 | -0.7228                 | E9AQ29                    | tr E9AQ29 E9AQ29_LEIMU                 | Ribonucleoprotein p18, mitochondrial, putative                                    | 5                  |

|             |         |           |                        |                                                      |   |
|-------------|---------|-----------|------------------------|------------------------------------------------------|---|
| 2.794542651 | -0.7242 | E9ART6    | tr E9ART6 E9ART6_LEIMU | Plasma membrane ATPase OS=Leishmania mexi            | 6 |
| 0.5922187   | -0.733  | E9B3Y5    | tr E9B3Y5 E9B3Y5_LEIMU | Uncharacterized protein OS=Leishmania mexicar        | 2 |
| 2.408716407 | -0.7389 | E9APV6    | tr E9APV6 E9APV6_LEIMU | Putative kinesin K39 OS=Leishmania mexicana (s       | 3 |
| 2.771166667 | -0.739  | E9AXF0    | sp E9AXF0 IF5A_LEIMU   | Eukaryotic translation initiation factor 5A OS=Leish | 3 |
| 3.242759286 | -0.7463 | E9B665    | tr E9B665 E9B665_LEIMU | Putative 60S ribosomal protein L5 OS=Leishmani       | 5 |
| 2.049888327 | -0.7515 | E9ARW8    | tr E9ARW8 E9ARW8_LEIMU | Uncharacterized protein OS=Leishmania mexi           | 3 |
| 2.579853419 | -0.7532 | E9AK86    | tr E9AK86 E9AK86_LEIMU | Acyltransferase-like protein, copy 2 OS=Leishma      | 3 |
| 3.081333764 | -0.759  | E9AW42    | tr E9AW42 E9AW42_LEIMU | ABC transporter-like protein OS=Leishmania m         | 2 |
| 3.513532775 | -0.7731 | V5RIA5;E9 | tr V5RIA5 V5RIA5_LEIAM | Calmodulin-like protein OS=Leishmania amazone        | 3 |
| 2.2647001   | -0.7804 | E9B012    | tr E9B012 E9B012_LEIMU | Putative zinc transporter OS=Leishmania mexica       | 2 |
| 2.849177434 | -0.7848 | E9ALH7    | tr E9ALH7 E9ALH7_LEIMU | Putative 60S ribosomal protein L13 OS=Leishma        | 6 |
| 2.710283511 | -0.7965 | E9APB2    | tr E9APB2 E9APB2_LEIMU | Uncharacterized protein OS=Leishmania mexica         | 4 |
| 1.932135395 | -0.7993 | E9ANG1    | tr E9ANG1 E9ANG1_LEIMU | Uncharacterized protein OS=Leishmania mexi           | 2 |
| 2.786816701 | -0.8065 | E8NHE3    | tr E8NHE3 E8NHE3_LEIMU | Putative 60S ribosomal protein L28 OS=Leishma        | 3 |
| 3.105880367 | -0.8066 | E9ANF3    | tr E9ANF3 E9ANF3_LEIMU | Uncharacterized protein OS=Leishmania mexica         | 6 |
| 2.515170467 | -0.8117 | E9AXX0    | tr E9AXX0 E9AXX0_LEIMU | Uncharacterized protein OS=Leishmania mexica         | 2 |
| 2.579168861 | -0.8181 | E9AQ99;E9 | tr E9AQ99 E9AQ99_LEIMU | 60S ribosomal protein L6 OS=Leishmania mexi          | 3 |
| 2.496890037 | -0.8264 | E9B1D2    | tr E9B1D2 E9B1D2_LEIMU | Putative serine/threonine-protein kinase OS=Lei      | 4 |
| 2.381457864 | -0.8271 | E9B6Q7    | tr E9B6Q7 E9B6Q7_LEIMU | Putative 60S ribosomal protein L23 OS=Leishma        | 4 |
| 2.569812272 | -0.828  | E9AY41    | tr E9AY41 E9AY41_LEIMU | Putative 10 kDa heat shock protein OS=Leishmar       | 3 |
| 3.107465515 | -0.8382 | E9AXD1    | tr E9AXD1 E9AXD1_LEIMU | Uncharacterized protein OS=Leishmania mexica         | 4 |
| 3.243822995 | -0.8445 | E9AVK9    | tr E9AVK9 E9AVK9_LEIMU | Uncharacterized protein OS=Leishmania mexica         | 2 |
| 3.03016063  | -0.8636 | E9AVK4    | tr E9AVK4 E9AVK4_LEIMU | Uncharacterized protein OS=Leishmania mexica         | 6 |
| 3.485903733 | -0.8675 | Q9NGK2;E9 | tr Q9NGK2 Q9NGK2_LEIAM | 40S ribosomal protein S24 OS=Leishmania ama          | 5 |
| 3.337043348 | -0.8948 | E9ALB6    | tr E9ALB6 E9ALB6_LEIMU | Putative nucleolar RNA-binding protein OS=Leish      | 3 |
| 2.343149798 | -0.8965 | E9AWJ4    | tr E9AWJ4 E9AWJ4_LEIMU | Putative 60S ribosomal protein L17 OS=Leishma        | 3 |
| 2.828047642 | -0.9207 | E9B047    | tr E9B047 E9B047_LEIMU | Putative glycosomal membrane protein OS=Leish        | 2 |
| 3.187440576 | -0.9354 | E9AQB1    | tr E9AQB1 E9AQB1_LEIMU | 60S acidic ribosomal protein P2 OS=Leishmania        | 2 |
| 2.886106385 | -0.9542 | E9B1H5    | tr E9B1H5 E9B1H5_LEIMU | Putative ATP-dependent RNA helicase OS=Leish         | 2 |
| 2.852072816 | -0.9899 | E9AQ19    | tr E9AQ19 E9AQ19_LEIMU | Putative 60S ribosomal protein L13a OS=Leishr        | 5 |
| 3.330694102 | -1.0339 | E9B376;A0 | tr E9B376 E9B376_LEIMU | Nucleoside diphosphate kinase OS=Leishmania n        | 2 |
| 3.189458665 | -1.0367 | E9B2E2    | tr E9B2E2 E9B2E2_LEIMU | Uncharacterized protein OS=Leishmania mexicar        | 7 |
| 2.960857464 | -1.053  | E9AK81    | tr E9AK81 E9AK81_LEIMU | Uncharacterized protein OS=Leishmania mexica         | 5 |
| 2.924042385 | -1.0652 | E9AXC7;E9 | tr E9AXC7 E9AXC7_LEIMU | RNA-binding protein, putative, UPB2 OS=Leishm        | 3 |
| 3.700379913 | -1.0759 | E9AYA9    | tr E9AYA9 E9AYA9_LEIMU | Uncharacterized protein OS=Leishmania mexica         | 3 |
| 2.730545714 | -1.0897 | E9AKU9    | tr E9AKU9 E9AKU9_LEIMU | Uncharacterized protein OS=Leishmania mexica         | 2 |
| 2.613171777 | -1.0988 | E9AM28    | tr E9AM28 E9AM28_LEIMU | Cofilin-like protein OS=Leishmania mexicana (s       | 2 |
| 2.560763147 | -1.1032 | E9B1E7;E9 | tr E9B1E7 E9B1E7_LEIMU | Putative 60S acidic ribosomal protein P2 OS=Leis     | 2 |
| 3.979739454 | -1.1132 | E9ANM6    | tr E9ANM6 E9ANM6_LEIMU | Uncharacterized protein OS=Leishmania mexi           | 3 |
| 2.842654209 | -1.1285 | E9B5U1;E9 | tr E9B5U1 E9B5U1_LEIMU | 60S ribosomal protein L18a OS=Leishmania mex         | 3 |
| 3.303875053 | -1.2193 | E9ALB7    | tr E9ALB7 E9ALB7_LEIMU | RNA binding protein-like protein OS=Leishmania       | 3 |
| 3.243615272 | -1.2429 | E9B2E8    | tr E9B2E8 E9B2E8_LEIMU | Uncharacterized protein OS=Leishmania mexicar        | 6 |
| 3.299144753 | -1.4505 | E9ALA4    | tr E9ALA4 E9ALA4_LEIMU | Splicing factor pstr1-like protein OS=Leishmania     | 7 |
| 1.562636673 | -1.5019 | E9AKF9    | tr E9AKF9 E9AKF9_LEIMU | Kinetoplast-associated protein-like protein OS=L     | 2 |

Table S9. GO Terms enriched in the tanespimycin-affected *L. mexicana* RBPs

Top10 MF GO-Terms; Tanespimycin-affected RBPs of *L. mexicana* promastigotes

| ID         | Name                                         | Result count | P-value  | Benjamini |
|------------|----------------------------------------------|--------------|----------|-----------|
| GO:0003735 | structural constituent of ribosome           | 98           | 1.14E-37 | 3.46E-35  |
| GO:1901363 | heterocyclic compound binding                | 313          | 1.88E-14 | 2.28E-12  |
| GO:0097159 | organic cyclic compound binding              | 313          | 1.88E-14 | 2.28E-12  |
| GO:0003723 | RNA binding                                  | 119          | 3.60E-13 | 3.11E-11  |
| GO:0016875 | ligase activity, forming carbon-oxygen bonds | 18           | 3.27E-10 | 2.20E-08  |
| GO:0004812 | aminoacyl-tRNA ligase activity               | 18           | 3.27E-10 | 2.20E-08  |
| GO:0003729 | mRNA binding                                 | 45           | 2.12E-09 | 1.29E-07  |
| GO:0051082 | unfolded protein binding                     | 20           | 2.46E-09 | 1.36E-07  |
| GO:0003676 | nucleic acid binding                         | 155          | 3.97E-09 | 2.00E-07  |
| GO:0016874 | ligase activity                              | 39           | 5.82E-07 | 2.71E-05  |

Top10 CC GO-Terms; Tanespimycin-affected RBPs of *L. mexicana* promastigotes

| ID         | Name                                         | Result count | P-value  | Benjamini |
|------------|----------------------------------------------|--------------|----------|-----------|
| GO:0005840 | ribosome                                     | 125          | 4.00E-23 | 6.56E-21  |
| GO:0043232 | intracellular non-membrane-bounded organelle | 270          | 7.51E-21 | 4.93E-19  |
| GO:0032991 | protein-containing complex                   | 192          | 1.46E-16 | 6.85E-15  |
| GO:0005730 | nucleolus                                    | 90           | 3.00E-14 | 1.23E-12  |
| GO:0031981 | nuclear lumen                                | 201          | 3.83E-10 | 1.25E-08  |
| GO:0005737 | cytoplasm                                    | 527          | 9.56E-10 | 2.85E-08  |
| GO:0005634 | nucleus                                      | 283          | 5.18E-09 | 1.42E-07  |
| GO:0000502 | proteasome complex                           | 20           | 9.67E-09 | 2.44E-07  |
| GO:0044428 | obsolete nuclear part                        | 134          | 9.29E-08 | 2.18E-06  |
| GO:1905369 | endopeptidase complex                        | 20           | 1.02E-07 | 2.24E-06  |

Top10 BP GO-Terms; Tanespimycin-affected RBPs of *L. mexicana* promastigotes

| ID         | Name                                         | Result count | P-value  | Benjamini |
|------------|----------------------------------------------|--------------|----------|-----------|
| GO:0006412 | translation                                  | 130          | 2.94E-47 | 1.44E-44  |
| GO:0043043 | peptide biosynthetic process                 | 130          | 9.76E-47 | 3.19E-44  |
| GO:0043603 | cellular amide metabolic process             | 136          | 1.39E-46 | 3.42E-44  |
| GO:0006518 | peptide metabolic process                    | 132          | 6.45E-46 | 1.26E-43  |
| GO:1901566 | organonitrogen compound biosynthetic process | 167          | 1.70E-41 | 2.78E-39  |
| GO:0009058 | biosynthetic process                         | 200          | 1.45E-31 | 1.42E-29  |
| GO:0010467 | gene expression                              | 173          | 2.90E-29 | 2.03E-27  |
| GO:0034645 | cellular macromolecule biosynthetic process  | 141          | 6.73E-29 | 4.40E-27  |
| GO:1901564 | organonitrogen compound metabolic process    | 260          | 3.03E-28 | 1.86E-26  |
| GO:0008152 | metabolic process                            | 399          | 7.00E-22 | 3.81E-20  |

Top10 MF GO-Terms; Tanespimycin-affected RBPs of *L. mexicana* amastigotes

| ID         | Name                                                 | Result count | P-value  | Benjamini |
|------------|------------------------------------------------------|--------------|----------|-----------|
| GO:0003735 | structural constituent of ribosome                   | 82           | 4.50E-42 | 9.45E-40  |
| GO:1901363 | heterocyclic compound binding                        | 235          | 1.39E-26 | 1.17E-24  |
| GO:0097159 | organic cyclic compound binding                      | 235          | 1.39E-26 | 1.17E-24  |
| GO:0003723 | RNA binding                                          | 104          | 2.43E-24 | 1.70E-22  |
| GO:0003676 | nucleic acid binding                                 | 132          | 6.53E-21 | 3.92E-19  |
| GO:0003729 | mRNA binding                                         | 44           | 4.65E-17 | 2.17E-15  |
| GO:0036094 | small molecule binding                               | 137          | 1.14E-11 | 4.81E-10  |
| GO:0008135 | translation factor activity, RNA binding             | 26           | 1.61E-11 | 5.20E-10  |
| GO:0090079 | translation regulator activity, nucleic acid binding | 26           | 1.61E-11 | 5.20E-10  |
| GO:0043168 | anion binding                                        | 130          | 4.17E-11 | 1.25E-09  |

Top10 CC GO-Terms; Tanespimycin-affected RBPs of *L. mexicana* amastigotes

| ID         | Name     | Result count | P-value  | Benjamini |
|------------|----------|--------------|----------|-----------|
| GO:0005840 | ribosome | 92           | 1.43E-23 | 1.24E-21  |

|            |                                    |     |          |          |
|------------|------------------------------------|-----|----------|----------|
| GO:0005622 | intracellular anatomical structure | 431 | 1.48E-20 | 9.61E-19 |
| GO:0005730 | nucleolus                          | 75  | 2.30E-20 | 1.20E-18 |
| GO:0031981 | nuclear lumen                      | 136 | 2.08E-11 | 6.77E-10 |
| GO:0022626 | cytosolic ribosome                 | 11  | 1.45E-09 | 3.78E-08 |
| GO:0005829 | cytosol                            | 28  | 1.99E-09 | 4.70E-08 |
| GO:0005634 | nucleus                            | 179 | 1.45E-08 | 3.15E-07 |
| GO:0031974 | membrane-enclosed lumen            | 141 | 2.36E-08 | 4.10E-07 |
| GO:0043233 | organelle lumen                    | 141 | 2.36E-08 | 4.10E-07 |
| GO:0070013 | intracellular organelle lumen      | 141 | 2.36E-08 | 4.10E-07 |

Top10 BP GO-Terms; Tanespimycin-affected RBPs of *L. mexicana* amastigotes

| ID         | Name                                            | Result count | P-value  | Benjamini |
|------------|-------------------------------------------------|--------------|----------|-----------|
| GO:0006412 | translation                                     | 105          | 4.08E-50 | 1.11E-47  |
| GO:0043043 | peptide biosynthetic process                    | 105          | 1.05E-49 | 2.14E-47  |
| GO:0006518 | peptide metabolic process                       | 106          | 1.13E-48 | 1.84E-46  |
| GO:0044271 | cellular nitrogen compound biosynthetic process | 121          | 8.28E-40 | 1.12E-37  |
| GO:0034645 | cellular macromolecule biosynthetic process     | 113          | 2.84E-35 | 2.89E-33  |
| GO:0009058 | biosynthetic process                            | 149          | 4.11E-35 | 3.34E-33  |
| GO:0010467 | gene expression                                 | 132          | 9.59E-34 | 7.10E-32  |
| GO:0034641 | cellular nitrogen compound metabolic process    | 165          | 1.34E-29 | 7.81E-28  |
| GO:0044267 | cellular protein metabolic process              | 126          | 1.04E-18 | 4.48E-17  |
| GO:0044237 | cellular metabolic process                      | 217          | 6.49E-18 | 2.52E-16  |

Table S10. Effect of tanespimycin on the RBPs of *L. mexicana* positively (highlighted in blue) and negatively (highlighted in orange) correlated with the synthesis of the proteins.

| Log2 FC (Tan-noTan) | Protein IDs   | Protein name                                                                   |
|---------------------|---------------|--------------------------------------------------------------------------------|
| -0.900472641        | E8NH10        | 40S ribosomal protein S3a                                                      |
| -0.572738647        | E9AJ91        | Putative carboxylase                                                           |
| -0.867225011        | E9AK58        | Putative 60S ribosomal protein L10                                             |
| -0.872570038        | E9AK97        | Putative fructose-1,6-bisphosphatase, cytosolic                                |
| -0.752810796        | E9AKE4        | Putative microtubule-associated protein (Fragment)                             |
| -0.666592916        | E9AL62;E9AL63 | Putative 60S ribosomal protein L7a                                             |
| -1.181669235        | E9ALD8;E9B569 | 40S ribosomal protein S19-like protein                                         |
| -0.549959819        | E9ALG7        | Putative serine/threonine-protein kinase                                       |
| -0.837327321        | E9ALH7        | Putative 60S ribosomal protein L13                                             |
| -0.65726916         | E9ALL3        | Uncharacterized protein                                                        |
| -1.193260829        | E9AM67        | Proteasome regulatory non-ATPase subunit,putative                              |
| -0.435370763        | E9AP62;E8NHR0 | Tubulin alpha chain                                                            |
| 1.602411906         | E9AP69        | Uncharacterized protein                                                        |
| 0.581494013         | E9APB2        | Uncharacterized protein                                                        |
| -0.74956131         | E9APE7;E9APE6 | 40S ribosomal protein S4                                                       |
| -1.189582825        | E9API2        | Ubiquitin-conjugating enzyme-like protein                                      |
| -0.767786662        | E9APJ0        | Putative chaperonin TCP20                                                      |
| -1.388770421        | E9APT0        | Putative calpain-like cysteine peptidase                                       |
| -0.691284815        | E9AQ19        | Putative 60S ribosomal protein L13a                                            |
| 0.741272608         | E9AQ29        | Ribonucleoprotein p18, mitochondrial,putative                                  |
| -1.477350871        | E9AQ94        | Putative 40S ribosomal protein S3                                              |
| -0.873127619        | E9AQ99;E9B3Q4 | 60S ribosomal protein L6                                                       |
| -1.517837524        | E9AQB1        | 60S acidic ribosomal protein P2                                                |
| 0.956509908         | E9AQB4        | Putative 60S ribosomal protein L21                                             |
| -0.972090403        | E9ARA1        | Putative translation initiation factor                                         |
| -1.24161466         | E9ARZ1        | Putative 40S ribosomal protein S13                                             |
| -0.429400126        | E9AS67        | Uncharacterized protein                                                        |
| -0.500628153        | E9ASB9        | Histone H4                                                                     |
| -1.339741389        | E9ASD6        | Elongation factor 2                                                            |
| -1.008309682        | E9ASL3        | Putative 40S ribosomal protein S18                                             |
| -0.536635717        | E9ASM7        | Putative ribosomal protein L24                                                 |
| -0.799114863        | E9ASP5;E9AL81 | Putative 40S ribosomal protein S9                                              |
| -0.954479853        | E9AST4        | Clathrin heavy chain                                                           |
| -0.957728068        | E9AT13        | Putative tyrosine aminotransferase                                             |
| -1.111968358        | E9AT43        | Dihydrolipoamide acetyltransferase component of pyruvate dehydrogenase complex |
| -0.815184911        | E9AT73        | Succinate--CoA ligase [ADP-forming] subunit beta, mitochondrial                |
| -0.428725561        | E9AT99        | 14-3-3 protein-like protein                                                    |
| -1.460632324        | E9ATD8        | Putative cysteine synthase                                                     |
| -0.757368088        | E9ATK7        | Uncharacterized protein                                                        |
| -0.934185028        | E9ATNO        | Uncharacterized protein                                                        |
| -0.921944936        | E9ATN5;E9AP80 | Putative 60S ribosomal protein L18                                             |
| 0.74280866          | E9ATU4        | Uncharacterized protein                                                        |
| -0.441877365        | E9ATZ6        | Putative isoleucyl-tRNA synthetase                                             |
| -0.902696609        | E9AV93        | T-complex protein 1 subunit delta                                              |
| -0.822966894        | E9AVE1        | Putative RNA helicase                                                          |
| -0.850364685        | E9AVE2        | Uncharacterized protein                                                        |
| -0.986647924        | E9AVG6        | Proteasome subunit alpha type                                                  |
| -0.793238958        | E9AVH4        | 40S ribosomal protein S6                                                       |
| 0.622889837         | E9AVQ7        | Uncharacterized protein                                                        |
| -0.761469523        | E9AVR1        | Putative NADH-cytochrome b5 reductase                                          |
| -0.847902298        | E9AVX8        | I/6 autoantigen-like protein                                                   |
| -1.10760053         | E9AVY6        | Alanine--tRNA ligase                                                           |
| -0.61144956         | E9AW08        | Uncharacterized protein                                                        |
| -0.865780512        | E9AW84        | 3-ketoacyl-CoA thiolase-like protein                                           |
| -1.117176692        | E9AWE0        | T-complex protein 1 subunit gamma                                              |
| -1.088214874        | E9AWI3        | V-type proton ATPase subunit a                                                 |
| -1.049395879        | E9AWR7        | Malic enzyme                                                                   |
| -0.954166412        | E9AX01        | Uncharacterized protein                                                        |
| -0.425351461        | E9AXD1        | Uncharacterized protein                                                        |
| -0.489401499        | E9AXF3        | Uncharacterized protein                                                        |
| 0.462238948         | E9AXG9        | Peptidyl-prolyl cis-trans isomerase                                            |
| -1.46401151         | E9AXT3        | Uncharacterized protein                                                        |
| -1.487605413        | E9AXZ5        | Adenine phosphoribosyltransferase                                              |



|              |                      |                                                                                |
|--------------|----------------------|--------------------------------------------------------------------------------|
| -0.64060084  | E9AY60;E9AY59        | Glutathione peroxidase                                                         |
| -1.05365181  | E9AYS6               | Kinetoplast-associated protein-like protein                                    |
| -1.070138295 | E9AZE0               | Obg-like ATPase 1                                                              |
| -0.960509618 | E9B073               | Putative acyl-CoA dehydrogenase                                                |
| -0.779999415 | E9B078               | Putative 40S ribosomal protein S17                                             |
| -1.041792552 | E9B1E9               | Putative 5-methyltetrahydropteroyltriglutamate--homocysteine methyltransferase |
| -0.675694784 | E9B150               | Putative vacuolar-type proton translocating pyrophosphatase 1                  |
| -0.855739594 | E9B1W4;E9B1W3        | Thiolase protein-like protein                                                  |
| -1.110507965 | E9B297               | Putative acetyl-CoA carboxylase                                                |
| -0.941595713 | E9B2L9               | Uncharacterized protein                                                        |
| -1.301782608 | E9B2Q1               | Uncharacterized protein                                                        |
| -1.048489253 | E9B350;E9B348        | Putative ribosomal protein L27                                                 |
| -0.773775736 | E9B384               | Uncharacterized protein                                                        |
| -0.93494161  | E9B3B4               | Dihydrolipoyl dehydrogenase                                                    |
| -0.904457728 | E9B3G5               | Putative myosin heavy chain                                                    |
| 0.418612162  | E9B3L2;P27741        | Heat shock protein 83-1                                                        |
| 0.415847143  | E9B3P3               | Uncharacterized protein                                                        |
| -1.288141886 | E9B3W9               | Cysteine conjugate beta-lyase,aminotransferase-like protein                    |
| 1.074305216  | E9B3Z3               | Ribulose-phosphate 3-epimerase                                                 |
| -0.599527359 | E9B478               | Putative heat shock protein                                                    |
| -0.723982493 | E9B493               | Putative carboxypeptidase                                                      |
| -0.963277817 | E9B544               | Uncharacterized protein                                                        |
| -1.119827906 | E9B578;E9B396        | Putative ribosomal protein L3                                                  |
| -0.740579605 | E9B5F7               | Transmembrane 9 superfamily member                                             |
| -0.815516154 | E9B5P1;Q27686        | Pyruvate kinase                                                                |
| -0.859295527 | E9B555               | Putative ATP-dependent DEAD-box RNA helicase                                   |
| -1.007140477 | E9B5Z7               | Putative NADH-dependent fumarate reductase                                     |
| -0.737489065 | E9B665               | Putative 60S ribosomal protein L5                                              |
| -1.585186005 | E9B669;E9AV40        | Putative 60S Ribosomal protein L36                                             |
| -0.93783315  | E9B694               | Uncharacterized protein                                                        |
| -0.544847488 | E9B6K2               | Putative cystathione gamma lyase                                               |
| -1.810284932 | E9B6Q4               | Putative 60S ribosomal protein L27A/L29                                        |
| -1.145910263 | E9B6Q7               | Putative 60S ribosomal protein L23                                             |
| -1.161759059 | E9B6U3               | Polyadenylate-binding protein                                                  |
| -1.235321681 | E9B6X2               | Putative mitochondrial phosphate transporter                                   |
| -0.488818487 | Q8MPM3;E9AX52        | Transketolase                                                                  |
| -1.245927175 | Q9BLW4;E9AW11        | GDP-mannose pyrophosphorylase                                                  |
| -0.756830215 | Q9NGK2;E9AT64        | 40S ribosomal protein S24                                                      |
| -0.431416194 | E8NHE3               | Putative 60S ribosomal protein L28                                             |
| -1.293479284 | E8NHJ5;E9AWZ6        | IgE-dependent histamine-releasing factor,putative                              |
| 1.556575139  | E9AJC9               | 40S ribosomal protein S7                                                       |
| -1.424559911 | E9AJK8               | Uncharacterized protein                                                        |
| -0.63649559  | E9AKA4;C6KJE2;C6KJD6 | Actin                                                                          |
| -1.332153956 | E9AKK2               | Dipeptidyl peptidase 3                                                         |
| -0.814347585 | E9AKP0               | Peptidyl-prolyl cis-trans isomerase                                            |
| 1.156283696  | E9ALA4               | Splicing factor ptsr1-like protein                                             |
| -0.958375295 | E9ALK7               | Rab GDP dissociation inhibitor                                                 |
| -0.804760615 | E9ALM8               | Putative fumarate hydratase (Fragment)                                         |
| -0.969751994 | E9ALU2               | Putative carnitine/choline acetyltransferase                                   |
| -1.61127917  | E9ALW5;E9ALW4        | Putative ribosomal protein L1a                                                 |
| -0.456759771 | E9ALY6;Q9U4E3        | Putative ADP ribosylation factor 3                                             |
| 1.952315648  | E9AM47               | Uncharacterized protein                                                        |
| 2.419125239  | E9AMA8               | Superoxide dismutase                                                           |
| -1.158338547 | E9ANA1               | Putative small GTP-binding protein Rab11                                       |
| -0.825245539 | E9ANH0               | Proteasome subunit alpha type                                                  |
| -1.064140956 | E9ANI1               | Putative 14-3-3 protein                                                        |
| -1.150180817 | E9ANP7               | Uncharacterized protein                                                        |
| -0.767587026 | E9ANV2               | Putative cysteinyl-tRNA synthetase                                             |
| -0.720156988 | E9ANZ0               | Putative alanine aminotransferase                                              |
| 0.57394282   | E9APL2               | Uncharacterized protein                                                        |
| -1.104552587 | E9APW3;Q3HL75        | Enolase                                                                        |
| 0.999807358  | E9APZ2               | Uncharacterized protein                                                        |
| -0.53196907  | E9AQA0               | NAD-specific glutamate dehydrogenase                                           |
| -0.528673808 | E9AQN5               | Transaldolase                                                                  |
| -1.368091583 | E9ARC2               | Uncharacterized protein                                                        |
| -0.796550115 | E9ARI8               | Aconitate hydratase                                                            |
| -0.704473495 | E9ARN6               | UTP--glucose-1-phosphate uridylyltransferase                                   |

|              |                     |                                                             |
|--------------|---------------------|-------------------------------------------------------------|
| -0.679398855 | E9ASC5              | Stress-inducible protein ST11 homolog                       |
| -1.270690918 | E9ASQ6              | Transitional endoplasmic reticulum ATPase,putative          |
| -1.034269969 | E9ASS2              | Uncharacterized protein                                     |
| 1.659996033  | E9AT16;E9AT15;C9E26 | Methyltransferase                                           |
| 0.976696014  | E9ATF6;E9ARS4       | Putative 60S ribosomal protein L34                          |
| -0.525150935 | E9ATH3              | Adenosylhomocysteinase                                      |
| 1.634650548  | E9AU20              | Uncharacterized protein                                     |
| -1.054442088 | E9AU26              | Uncharacterized protein                                     |
| -0.619620641 | E9AUA1              | 2,3-bisphosphoglycerate-independent phosphoglycerate mutase |
| 1.099084218  | E9AUU6              | Putative 40S ribosomal protein S11                          |
| -0.820654551 | E9AUZ2;E9AUZ1;Q4VT6 | Phosphotransferase                                          |
| -1.627217611 | E9AV22              | Dihydrolipoamide acetyltransferaselike protein              |
| -0.775581996 | E9AV44              | Proteasome regulatory non-ATP-ase subunit 5,putative        |
| -0.63511912  | E9AVH3              | Putative ATP synthase F1 subunit gamma protein              |
| -0.559890111 | E9AW21              | Putative endoribonuclease L-PSP (Pb5)                       |
| -1.37147967  | E9AW86;E9AW57       | Acetyl-coenzyme A synthetase                                |
| 0.434722265  | E9AWR8              | Putative malic enzyme                                       |
| 0.593442917  | E9AX53              | 40S ribosomal protein S8                                    |
| -0.604983648 | E9AX57              | Uncharacterized protein                                     |
| -0.575230281 | E9AXJ1              | Aldehyde dehydrogenase, mitochondria                        |
| -0.959449132 | E9AXM1              | GTP-binding nuclear protein                                 |
| -1.035684586 | E9AXQ3              | Pyruvate dehydrogenase E1 component subunit beta            |
| -0.688212713 | E9AYD6              | Putative thimet oligopeptidase                              |
| -0.474522273 | E9AZ67              | Uncharacterized protein                                     |
| -0.739544551 | E9AZ89;A5JV94       | Putative trypanothione synthetase                           |
| -0.924343109 | E9AZR7              | Putative ribosomal protein S20                              |
| -0.588586807 | E9B047              | Putative glycosomal membrane protein                        |
| -0.510678609 | E9B1C6              | S-adenosylmethionine synthase                               |
| -1.135185877 | E9B215              | Prostaglandin f2-alpha synthase                             |
| -1.45102946  | E9B2J9              | Putative RNA binding protein                                |
| -0.479981105 | E9B2V9;E9B2W0       | Superoxide dismutase                                        |
| -0.738406499 | E9B307              | Uncharacterized protein                                     |
| -0.48428599  | E9B376              | Nucleoside diphosphate kinase                               |
| -1.251626968 | E9B3B0              | Putative chaperonin alpha subunit                           |
| -0.968808492 | E9B473              | Succinyl-CoA:3-ketoacid-coenzyme A transferase              |
| -1.622092565 | E9B4X7              | Uncharacterized protein                                     |
| -1.324446996 | E9B6B5              | Putative aminopeptidase                                     |
| 2.924128215  | E9B6K7              | Putative 60S ribosomal subunit protein L31                  |
| -0.982737223 | E9B6N5              | Uncharacterized protein                                     |
| -1.14064916  | E9B6R4              | T-complex protein 1 subunit eta                             |
| -1.107983271 | E9B713              | Proteasome subunit alpha type                               |
| -0.966897329 | E9AR60              | Uncharacterized protein                                     |
| -0.591276169 | E9APY4              | Myo-inositol-1-phosphate synthase                           |
